# Supplementary material for: The tissue-specific effects of glucose-lowering drug targets on aging mediated through DNA methylation: a multi-omics genetic study
Source: Research Square preprint supplement (doi:10.21203/rs.3.rs-7798894/v1), 2025-10-21
Supplement: Supplementary file 1 [file 1ed419292a56a34814658482.xlsx]

## Sheet: Sheet1
Table 1. Characteristics of the participants involved in the outcome GWAS
GWAS Catlog ID	Trait	Sample size (N cases/ N controls)	Platform [SNPs passing QC]	Mean age	Range of age	Female percentage	Ancestry	Cohort
GCST006700	Father's age at death	317652	Affymetrix [11,535,925]	56.66	40 - 73	54.7	European(white British)	UK biobank
GCST006699	Mother's age at death	246941	Affymetrix [11,535,925]	56.66	40 - 73	54.7	European(white British)	UK biobank
GCST006702	Combined parental age at death	208118	Affymetrix [11,535,925]	56.66	40 - 73	54.7	European(white British)	UK biobank
GCST90014289	Hannum Age	34449	Affymetrix, Illumina [7,565,493]	54.8	27-79	57.3	European	28 cohorts
GCST90014290	Intrinsic Horvath Age	34461	Affymetrix, Illumina [7,567,980]	54.8	27-79	57.3	European	28 cohorts
GCST90014292	PhenoAge	34463	Affymetrix, Illumina [7,568,033]	54.8	27-79	57.3	European	28 cohorts
GCST90014288	Grimage	34467	Affymetrix, Illumina [7,568,149]	54.8	27-79	57.3	European	28 cohorts
GCST90165257	Leukocyte telomere length	418401	Affymetrix, Illumina [63,064,759]	62.0 from UKB/73.0 from GHS	NA	54.0 from UKB/55.2 from GHS	European	UK biobank\Geisinger MyCode Community Health Initiative
GCST007406	Healthspan	300,447 (84,949/215,528)	Affymetrix [11,309,218]	NA	37-73	NA	European	UK biobank
GCST90295968	Frailty	386565	Affymetrix [8,883,488]	57	40-69	54.0	European	UK biobank
