# Supplementary material for: The tissue-specific effects of glucose-lowering drug targets on aging mediated through DNA methylation: a multi-omics genetic study
Source: Research Square preprint supplement (doi:10.21203/rs.3.rs-7798894/v1), 2025-10-21
Supplement: Supplementary file 2 [file 78a645b2796e2fc7533d60c8.xlsx]

## Sheet: Sheet1
Table 2. Characteristics of the participants involved in the glycaemic traits GWAS
Trait	Sample size(N cases/N controls)	Platform [SNPs passing QC]	Ancestry	Cohort
Two-hour glucose	63396	Affymetrix, Illumina [30,098,705]	European	91 cohorts
Fasting glucose	200622	Affymetrix, Illumina [34,064,007]	European	91 cohorts
Fasting insulin	151013	Affymetrix, Illumina [32,635,793]	European	91 cohorts
HbA1c	146806	Affymetrix, Illumina [33,811,881]	European	91 cohorts
Type 2 diabetes	1,812,017(242,283/1,569,734)	Various[NA]	European	36 cohorts
