# Supplementary material for: The tissue-specific effects of glucose-lowering drug targets on aging mediated through DNA methylation: a multi-omics genetic study
Source: Research Square preprint supplement (doi:10.21203/rs.3.rs-7798894/v1), 2025-10-21
Supplement: Supplementary file 3 [file a02a6551127a7fb720b44bba.docx]

**ESM Method 1. GWAS of the aging outcomes**

Parental longevity is a strong indicator of chronological age. Inherited combination of parental genetic variants enables offspring individuals to live longer and have lower incidence of several cardiovascular diseases [1], cancers [2] and slower cognitive decline [3]. Here we collected GWAS summary statistics of three parental longevity traits from European descent participants in UK Biobank, including: father’s age at death (N = 317,652), mother’s age at death (N = 246,941), combined parental age at death (N = 208,118) [4]. Epigenetic clocks are another estimator for chronological age, morbidity and mortality based on DNA methylation-level data at different Cytosine-phosphate-Guanine sites (CpG sites) [5]. We selected two first-generation epigenetic aging clocks including Hannum Age (NCpG = 71) [6] and Intrinsic Horvath Age (NCpG = 353) [6], and two second generation clocks including PhenoAge (NCpG = 513) [7] and GrimAge (NCpG = 1,030) [8]. The GWAS summary data of the acceleration of these four epigenetic clocks are obtained from a study involving 34,710 European descent participants from 28 cohorts [5]. Telomere length is a proposed marker of biomedical age for strong association with cellular proliferation and senescence. In this study, we used the latest public GWAS Summary statistics about leukocyte telomere length (LTL) in blood samples of European descent from UK Biobank (N = 418,401) [9]. The LTL quantification is consistent with Codd et.al. [10].

Considering the extension of lifespan is not necessarily followed by a matching improvement of life quality or health state in one’s old age [11], we included healthspan and frailty as two supplementary aging biomarkers that mainly reflect functional and disease-free survival. Here, healthspan is defined as the age of the onset of the first disease from the selected “Gompertzian” diseases or death list, including top eight morbidities (Congestive Heart Failure (CHF), Myocardial Infarction (MI), Chronic Obstructive Pulmonary Disease (COPD), stroke, dementia, diabetes, cancer, and death) strongly associated with age after the age of 40 [12]. In this study, we used the GWAS summary statistics collected from British ancestry individuals in UK Biobank (N = 300,447, N cases = 84,949, N controls = 215,528) [12]. It applied the Cox-Gompertz proportional hazards model to predict the age of end of the healthspan, with β representing the regression coefficient estimate (units of measurement is log(hazard ratio) per allele). Frailty is an aging-related clinical phenotype defined as a state in which there is an increase in a person’s vulnerability for dependency and/or mortality when exposed to a stressor [13]. We extracted the GWAS summary statistics of frailty from European descent participants enrolled in UK Biobank (N = 386,565) [14], whose frailty state was measured as an ordinal variable using Fried Frailty Score [15].

**ESM Method 2. Simplified algorithm from the Human Protein Atlas (HPA)**

Tissue-specific gene classification was adapted from the Human Protein Atlas (HPA) framework (Uhlén et al., 2015). For simplification, fold-change thresholds were calculated against the average expression of other tissues. Genes were categorized based on median TPM expression across tissues as follows:

1. Not detected: Genes with expression <1 TPM in all tissues.
2. Tissue enriched: Genes showing markedly higher expression in a single tissue compared to others.
3. Group enriched: Genes with elevated expression in 2–7 tissues relative to others.
4. Tissue enhanced: Genes expressed higher in a particular tissue compared to the average of other tissues, but not meeting the criteria for tissue- or group-enrichment.
5. Low tissue specificity: Genes that did not fit any of the above categories.

**References for ESM Method**

[1] Atkins JL, Pilling LC, Ble A, et al. (2016) Longer-Lived Parents and Cardiovascular Outcomes: 8-Year Follow-Up In 186,000 U.K. Biobank Participants. J Am Coll Cardiol 68(8): 874-875. 10.1016/j.jacc.2016.05.072

[2] Dutta A, Henley W, Robine JM, Langa KM, Wallace RB, Melzer D (2013) Longer lived parents: protective associations with cancer incidence and overall mortality. J Gerontol A Biol Sci Med Sci 68(11): 1409-1418. 10.1093/gerona/glt061

[3] Dutta A, Henley W, Robine JM, et al. (2014) Aging children of long-lived parents experience slower cognitive decline. Alzheimers Dement 10(5 Suppl): S315-322. 10.1016/j.jalz.2013.07.002

[4] Pilling LC, Kuo CL, Sicinski K, et al. (2017) Human longevity: 25 genetic loci associated in 389,166 UK biobank participants. Aging (Albany NY) 9(12): 2504-2520. 10.18632/aging.101334

[5] McCartney DL, Min JL, Richmond RC, et al. (2021) Genome-wide association studies identify 137 genetic loci for DNA methylation biomarkers of aging. Genome Biol 22(1): 194. 10.1186/s13059-021-02398-9

[6] Hannum G, Guinney J, Zhao L, et al. (2013) Genome-wide methylation profiles reveal quantitative views of human aging rates. Mol Cell 49(2): 359-367. 10.1016/j.molcel.2012.10.016

[7] Levine ME, Lu AT, Quach A, et al. (2018) An epigenetic biomarker of aging for lifespan and healthspan. Aging (Albany NY) 10(4): 573-591. 10.18632/aging.101414

[8] Lu AT, Quach A, Wilson JG, et al. (2019) DNA methylation GrimAge strongly predicts lifespan and healthspan. Aging (Albany NY) 11(2): 303-327. 10.18632/aging.101684

[9] Kessler MD, Damask A, O'Keeffe S, et al. (2022) Common and rare variant associations with clonal haematopoiesis phenotypes. Nature 612(7939): 301-309. 10.1038/s41586-022-05448-9

[10] Codd V, Wang Q, Allara E, et al. (2021) Polygenic basis and biomedical consequences of telomere length variation. Nat Genet 53(10): 1425-1433. 10.1038/s41588-021-00944-6

[11] Jagger C, Gillies C, Moscone F, et al. (2008) Inequalities in healthy life years in the 25 countries of the European Union in 2005: a cross-national meta-regression analysis. Lancet 372(9656): 2124-2131. 10.1016/S0140-6736(08)61594-9

[12] Zenin A, Tsepilov Y, Sharapov S, et al. (2019) Identification of 12 genetic loci associated with human healthspan. Commun Biol 2: 41. 10.1038/s42003-019-0290-0

[13] Cesari M, Calvani R, Marzetti E (2017) Frailty in Older Persons. Clin Geriatr Med 33(3): 293-303. 10.1016/j.cger.2017.02.002

[14] Ye Y, Noche RB, Szejko N, et al. (2023) A genome-wide association study of frailty identifies significant genetic correlation with neuropsychiatric, cardiovascular, and inflammation pathways. Geroscience 45(4): 2511-2523. 10.1007/s11357-023-00771-z

[15] Fried LP, Tangen CM, Walston J, et al. (2001) Frailty in older adults: evidence for a phenotype. J Gerontol A Biol Sci Med Sci 56(3): M146-156. 10.1093/gerona/56.3.m146

**ESM Method 2. Strobe-MR checklist**

| **Item** | **Complete/location** |
| --- | --- |
| 1. **Title and Abstract:** "Mendelian randomization" is named both in the title and the abstract | Completed. |
| **Introduction** |  |
| 1. **Background:** Explain the scientific background and rationale for the reported study. Is causality between exposure and outcome plausible? Justify why MR is a helpful method to address the study question. | Concept of Mendelian randomization and specific request for Mendelian randomization are explained in the third paragraph of the introduction. |
| 1. **Objectives:** State specific objectives clearly, including pre-specified causal hypotheses (if any). | The aim of this study has been stated in the fourth paragraph of the introduction. |
| **Methods** |  |
| 1. **Study design and data sources:** Present key elements of study design early in the paper. Consider including a table listing sources of data for all phases of the study. For each data source contributing to the analysis, describe the following:   a) Describe the study design and the underlying population from which it was drawn. Describe also the setting, locations, and relevant dates, including periods of recruitment, exposure, follow-up, and data collection, if available.  b) Give the eligibility criteria, and the sources and methods of selection of participants.  c) Explain how the analyzed sample size was arrived at.  d) Describe measurement, quality and selection of genetic variants.  e) For each exposure, outcome and other relevant variables, describe methods of assessment and, in the case of diseases, the diagnostic criteria used.  f) Provide details of ethics committee approval and participant informed consent, if relevant. | All necessary information about the GWAS studies used in this study have been described in the Methods section.  The study design is presented in Figure 1.  Population involved in this study is described in Supplementary Table 1 and Supplementary Table 2.  The genetic predictor selection process has been described in the Methods section "Selection of genetic instruments for glucose-lowering drug targets".  For outcomes, positive controls and mediator, detailed information is provided in the Methods section "Selection of aging proxy indicators", "Selection of positive controls", "Selection of DNAm mediators" and ESM Method 1. |
| 1. **Assumptions:** Explicitly state assumptions for the main analysis (e.g. relevance, exclusion, independence, homogeneity) as well assumptions for any additional or sensitivity analysis. | The Mendelian randomization assumptions have been described in Methods section "Validation of MR assumptions". |
| 1. **Statistical methods main analysis**   Describe statistical methods and statistics used.  a) Describe how quantitative variables were handled in the analyses (i.e., scale, units, model).  b) Describe the process for identifying genetic variants and weights to be included in the  analyses (i.e, independence and model). Consider a flow diagram.  c) Describe the MR estimator, e.g. two-stage least squares, Wald ratio, and related statistics.  Detail the included covariates and, in case of two-sample MR, whether the same covariate set was used for adjustment in the two samples.  d) Explain how missing data were addressed.  e) If applicable, say how multiple testing was dealt with. | a) Described in the "Mendelian randomization analyses" section within Methods;  b) Described in the section "Selection of genetic instruments for glucose-lowering drug targets" within Methods;  c) Described in the section "Mendelian randomization analyses s" within Methods. |
| 1. **Assessment of assumptions: Describe any methods used to assess the assumptions or justify their validity.** | Described in "Validation of MR assumptions" section within Methods. |
| 1. **Sensitivity analyses:** Describe any sensitivity analyses or additional analyses performed. | The Mendelian randomization sensitivity analyses have been described in "Mendelian randomization analyses", "Validation of MR assumptions". Additional analyses have been described in "Genetic correlation analysis", "Enrichment analyses", "Triangulation of evidence" section. |
| 1. **Software and pre-registration**   a) Name statistical software and package(s), including version and settings used.  b) State whether the study protocol and details were pre-registered (as well as when and  where). | All statistical software and settings used are described in the "Data availability" section. |
| **Results** |  |
| 1. **Descriptive data**   a) Report the numbers of individuals at each stage of included studies and reasons for exclusion. Consider use of a flow-diagram.  b) Report summary statistics for phenotypic exposure(s), outcome(s) and other relevant variables (e.g. means, standard deviations, proportions).  c) If the data sources include meta-analyses of previous studies, provide the number of studies, their reported ancestry, if available, and assessments of heterogeneity across these studies. Consider using a supplementary table for each data source.  d) For two-sample Mendelian randomization:  i. Provide information on the similarity of the genetic variant-exposure associations between the exposure and outcome samples.  ii. Provide information on extent of sample overlap between the exposure and outcome data sources. | a) Information is given in the Methods and Figure 1;  b) We described the detailed information of the summary statistics for our instruments in ESM Tables 2 and 7. Summary statistics from each GWAS are described in the "Selection of aging proxy indicators" section of the Methods and ESM Method 1;  c) We provide this information in Supplementary Table 1 and Supplementary Table 2;  d) We provide this information in Supplementary Table 1 and Supplementary Table 2. |
| 1. **Main results**   a) Report the associations between genetic variant and exposure, and between genetic variant and outcome, preferably on an interpretable scale (e.g. comparing 25th and 75th percentile of allele count or genetic risk score, if individual-level data available).  b) Report causal effect estimate between exposure and outcome, and the measures of uncertainty from the MR analysis. Use an intuitive scale, such as odds ratio, or relative  risk, per standard deviation difference.  c) If relevant, consider translating estimates of relative risk into absolute risk for a meaningful time-period.  d) Consider any plots to visualize results (e.g. forest plot, scatterplot of associations between genetic variants and outcome versus between genetic variants and exposure). | a) Genetic exposure and mediator associations have been reported in ESM Tables 2 and 7;  b) The causal effect estimates between exposures, mediators and outcomes are reported in ESM Tables 3, 5, 8, 9 and 10;  d) We visualized the results in Figure 3, Figure 4, Figure 5, Supplementary Figure 4 using forest plot and circular plot. |
| 1. **Assessment of assumptions**   a) Assess the validity of the assumptions.  b) Report any additional statistics (e.g., assessments of heterogeneity, such as I2, Q statistic). | a) We assessed the validity using sensitivity analyses, weighted median approach and mode estimate approach. |
| 1. **Sensitivity and additional analyses**   a) Use sensitivity analyses to assess the robustness of the main results to violations of the assumptions.  b) Report results from other sensitivity analyses (e.g., replication study with different dataset, analyses of subgroups, validation of instrument(s), simulations, etc.).  c) Report any assessment of direction of causality (e.g., bidirectional MR).  d) When relevant, report and compare with estimates from non-MR analyses.  e) Consider any additional plots to visualize results (e.g., leave-one-out analyses). | a) we have reported the use of LD check method as additional approach to test for Mendelian randomization. Results are listed in ESM Tables 6, 8 and 9;  b) Validation of instruments and positive control results are reported in ESM Table 3;  c) Steiger filtering results are listed in ESM Tables 6, 8 and 9;  d) EWAS and TWAS results are listed in ESM Tables 10 and 11;  e) Results of positive control is visualized in Supplementary Figure 1. |
| **Discussion** |  |
| 1. **Key results** | Discussion paragraph 1 Discussion section. |
| 1. **Limitations**   Discuss limitations of the study, taking into account the validity of the MR assumptions, other sources of potential bias, and imprecision. Discuss both direction and magnitude of any potential bias, and any efforts to address them. | Discussed in paragraph 6 of Discussion section. |
| 1. **Interpretations**   a) Give a cautious overall interpretation of results considering objectives and limitations.  Compare with results from other relevant studies.  b) Discuss underlying biological mechanisms that could be modelled by using the genetic  variants to assess the relationship between the exposure and the outcome.  c) Discuss whether the results have clinical or policy relevance, and whether interventions  could have the same size effect. | a) Interpretation: Discussion paragraphs 1, 2, 3, 4, 5, 6; Comparison with other studies: Discussion paragraphs 2, 3, 4  b) Discussion paragraphs 2, 3, 4;  c) Discussion paragraphs 1, 2, 3, 4, 5. |
| 1. **Generalizability:** | Discussed in Discussion paragraph 5, 6. |
| 1. **Funding:** | We have reported all sources of funding in the “Funding” section. |
| 1. **Data and data sharing:** | We have provided the link/approach to access genetic data used in this study in the “Data availability” section. |
| 1. **Conflicts of Interest:** | All authors have declared conflicts of interest. |
