# Supplementary material for: The tissue-specific effects of glucose-lowering drug targets on aging mediated through DNA methylation: a multi-omics genetic study
Source: Research Square preprint supplement (doi:10.21203/rs.3.rs-7798894/v1), 2025-10-21
Supplement: Supplementary file 4 [file a9eb96fd9ad95ef0dc18e1a0.xlsx]

## Sheet: ESM T1.Anti-diabetics and Genes
ESM Table 1. Anti-diabetic candidates and target genes
Drug category	Drug	Gene	Tier
α-glucosidase inhibitors	Acarbose	LPL	tier 2
α-glucosidase inhibitors	Acarbose	SI	tier 1
α-glucosidase inhibitors	Acarbose	AMY2A	tier 1
α-glucosidase inhibitors	Acarbose	GAA	tier 2
α-glucosidase inhibitors	Acarbose	SLC2A4	tier 2
α-glucosidase inhibitors	Acarbose	MGAM	tier 1
α-glucosidase inhibitors	Miglitol	MGAM	tier 1
α-glucosidase inhibitors	Miglitol	GAA	tier 2
α-glucosidase inhibitors	Miglitol	GAPDHP69	tier 2
α-glucosidase inhibitors	Miglitol	GATA6	tier 2
α-glucosidase inhibitors	Voglibose	MGAM	tier 1
α-glucosidase inhibitors	Voglibose	MGAM2	tier 1
α-glucosidase inhibitors	Voglibose	GAA	tier 2
α-glucosidase inhibitors	Voglibose	SI	tier 1
thiazolidinedione	Rosiglitazone	NFE2L2	tier 2
thiazolidinedione	Rosiglitazone	CD40LG	tier 2
thiazolidinedione	Rosiglitazone	HNF4A	tier 2
thiazolidinedione	Rosiglitazone	PIK3CG	tier 2
thiazolidinedione	Rosiglitazone	ATP2B1	tier 2
thiazolidinedione	Rosiglitazone	MAP2K3	tier 2
thiazolidinedione	Rosiglitazone	ABCD2	tier 2
thiazolidinedione	Rosiglitazone	RBP4	tier 2
thiazolidinedione	Rosiglitazone	SLCO2B1	tier 2
thiazolidinedione	Rosiglitazone	SCD	tier 2
thiazolidinedione	Rosiglitazone	PPARG	tier 1
thiazolidinedione	Rosiglitazone	CYP2C9	tier 2
thiazolidinedione	Rosiglitazone	NOS1	tier 2
thiazolidinedione	Rosiglitazone	TG	tier 2
thiazolidinedione	Rosiglitazone	CCND1	tier 2
thiazolidinedione	Rosiglitazone	AGTR2	tier 2
thiazolidinedione	Rosiglitazone	NPY	tier 2
thiazolidinedione	Rosiglitazone	NR1I2	tier 2
thiazolidinedione	Rosiglitazone	ATP4A	tier 2
thiazolidinedione	Rosiglitazone	HSD17B10	tier 2
thiazolidinedione	Rosiglitazone	CRH	tier 2
thiazolidinedione	Rosiglitazone	SLC2A1	tier 2
thiazolidinedione	Pioglitazone	CYP3A4	tier 2
thiazolidinedione	Pioglitazone	CCND1	tier 2
thiazolidinedione	Pioglitazone	HSPA4	tier 2
thiazolidinedione	Pioglitazone	LPL	tier 2
thiazolidinedione	Pioglitazone	ATP4A	tier 2
thiazolidinedione	Pioglitazone	CYP2C9	tier 2
thiazolidinedione	Pioglitazone	NFE2L2	tier 2
thiazolidinedione	Pioglitazone	GHRL	tier 2
thiazolidinedione	Pioglitazone	NR1I2	tier 2
thiazolidinedione	Pioglitazone	SLC2A1	tier 2
thiazolidinedione	Pioglitazone	THBS1	tier 2
thiazolidinedione	Pioglitazone	PPARG	tier 1
thiazolidinedione	Pioglitazone	G6PD	tier 2
thiazolidinedione	Pioglitazone	PTPRD	tier 2
thiazolidinedione	Pioglitazone	GFAP	tier 2
thiazolidinedione	Pioglitazone	TGFB1	tier 2
thiazolidinedione	Pioglitazone	YES1	tier 2
thiazolidinedione	Troglitazone	SLCO1B1	tier 2
thiazolidinedione	Troglitazone	CCND1	tier 2
thiazolidinedione	Troglitazone	XIAP	tier 2
thiazolidinedione	Troglitazone	GSTM1	tier 2
thiazolidinedione	Troglitazone	CYP1A2	tier 2
thiazolidinedione	Troglitazone	NR1I2	tier 2
thiazolidinedione	Troglitazone	VCAM1	tier 2
thiazolidinedione	Troglitazone	PIK3CG	tier 2
thiazolidinedione	Troglitazone	BDNF	tier 2
thiazolidinedione	Troglitazone	GADD45A	tier 2
thiazolidinedione	Troglitazone	UGT1A10	tier 2
thiazolidinedione	Troglitazone	CYP3A4	tier 2
thiazolidinedione	Troglitazone	ATP4A	tier 2
thiazolidinedione	Troglitazone	SLC2A4	tier 2
thiazolidinedione	Troglitazone	NFE2L2	tier 2
thiazolidinedione	Troglitazone	CYP2C19	tier 2
thiazolidinedione	Troglitazone	LEP	tier 2
thiazolidinedione	Troglitazone	PIK3CB	tier 2
thiazolidinedione	Troglitazone	APOE	tier 2
thiazolidinedione	Troglitazone	CYP2D6	tier 2
thiazolidinedione	Troglitazone	CYP2C9	tier 2
thiazolidinedione	Troglitazone	MYC	tier 2
thiazolidinedione	Troglitazone	GSTT1	tier 2
thiazolidinedione	Troglitazone	PPARG	tier 1
thiazolidinedione	Troglitazone	CXCL8	tier 2
thiazolidinedione	Troglitazone	ALOX15B	tier 2
sulfonylurea	Acetohexamide	KCNJ1	tier 1
sulfonylurea	Acetohexamide	KCNJ11	tier 1
sulfonylurea	Acetohexamide	ABCC8	tier 1
sulfonylurea	Tolbutamide	ABCC8	tier 1
sulfonylurea	Tolbutamide	ABCC9	tier 2
sulfonylurea	Tolbutamide	KCNJ1	tier 1
sulfonylurea	Tolbutamide	KCNJ11	tier 1
sulfonylurea	Tolbutamide	CYP2C19	tier 2
sulfonylurea	Tolbutamide	KCNJ8	tier 1
sulfonylurea	Tolbutamide	ASNSP2	tier 2
sulfonylurea	Tolbutamide	G6PD	tier 2
sulfonylurea	Tolazamide	ABCC8	tier 1
sulfonylurea	Tolazamide	EHMT2	tier 2
sulfonylurea	Tolazamide	KCNJ1	tier 1
sulfonylurea	Tolazamide	G6PD	tier 2
sulfonylurea	Tolazamide	KDM4A	tier 2
sulfonylurea	Tolazamide	KCNJ10	tier 2
sulfonylurea	Tolazamide	KCNJ11	tier 1
sulfonylurea	Chlorpropamide	KCNJ1	tier 1
sulfonylurea	Chlorpropamide	CYP2C19	tier 2
sulfonylurea	Chlorpropamide	CYP3A4	tier 2
sulfonylurea	Chlorpropamide	CYP1A2	tier 2
sulfonylurea	Chlorpropamide	NFKB1	tier 2
sulfonylurea	Chlorpropamide	CYP2D6	tier 2
sulfonylurea	Chlorpropamide	CYP2C9	tier 2
sulfonylurea	Chlorpropamide	ABCC8	tier 1
sulfonylurea	Chlorpropamide	KCNJ11	tier 1
sulfonylurea	Chlorpropamide	KCNJ10	tier 2
sulfonylurea	Chlorpropamide	G6PD	tier 2
sulfonylurea	Glipizide	SLC2A4	tier 2
sulfonylurea	Glipizide	KCNJ1	tier 1
sulfonylurea	Glipizide	KCNJ11	tier 1
sulfonylurea	Glipizide	ABCC8	tier 1
sulfonylurea	Glipizide	G6PD	tier 2
sulfonylurea	Glipizide	NOS1AP	tier 2
sulfonylurea	Glipizide	KCNJ10	tier 2
sulfonylurea	Glyburide	CYP2C9	tier 2
sulfonylurea	Glyburide	CYP2D6	tier 2
sulfonylurea	Glyburide	ABCB11	tier 2
sulfonylurea	Glyburide	PPARG	tier 1
sulfonylurea	Glyburide	FMO2	tier 2
sulfonylurea	Glyburide	AQP1	tier 2
sulfonylurea	Glyburide	ESR1	tier 2
sulfonylurea	Glyburide	MAPK1	tier 2
sulfonylurea	Glyburide	KCNJ1	tier 1
sulfonylurea	Glyburide	ABCC8	tier 1
sulfonylurea	Glyburide	ASNSP2	tier 2
sulfonylurea	Glyburide	KCNJ11	tier 1
sulfonylurea	Glyburide	NR1I2	tier 2
sulfonylurea	Glyburide	CFTR	tier 2
sulfonylurea	Glyburide	SCNN1B	tier 2
sulfonylurea	Glyburide	UGT2B15	tier 2
sulfonylurea	Glyburide	G6PD	tier 2
sulfonylurea	Glyburide	SLCO2B1	tier 2
sulfonylurea	Glyburide	KCNJ8	tier 1
sulfonylurea	Glyburide	CHST13	tier 2
sulfonylurea	Glyburide	CYP2C19	tier 2
sulfonylurea	Glyburide	BDKRB2	tier 2
sulfonylurea	Glyburide	SPINK5	tier 2
sulfonylurea	Glyburide	IL2	tier 2
sulfonylurea	Glyburide	NOS1AP	tier 2
sulfonylurea	Glyburide	CYP51A1	tier 2
sulfonylurea	Glyburide	CYP3A4	tier 2
sulfonylurea	Glyburide	SLC2A4	tier 2
sulfonylurea	Glyburide	ABCC5	tier 2
sulfonylurea	Glimepiride	ABCC9	tier 2
sulfonylurea	Glimepiride	KCNJ1	tier 1
sulfonylurea	Glimepiride	KCNJ11	tier 1
sulfonylurea	Glimepiride	G6PD	tier 2
sulfonylurea	Glimepiride	IRS1	tier 2
sulfonylurea	Glimepiride	ABCC8	tier 1
sulfonylurea	Glimepiride	NOS1AP	tier 2
sulfonylurea	Glimepiride	TNF	tier 2
sulfonylurea	Gliclazide	KCNJ1	tier 1
sulfonylurea	Gliclazide	KDM4A	tier 2
sulfonylurea	Gliclazide	ABCC8	tier 1
sulfonylurea	Gliclazide	KCNJ11	tier 1
sulfonylurea	Gliclazide	G6PD	tier 2
sulfonylurea	Gliquidone	KCNJ11	tier 1
sulfonylurea	Gliquidone	KDM4E	tier 2
sulfonylurea	Gliquidone	CYP3A4	tier 2
sulfonylurea	Gliquidone	HSD17B10	tier 2
sulfonylurea	Gliquidone	CYP2C9	tier 2
sulfonylurea	Gliquidone	ABCC8	tier 1
sulfonylurea	Gliquidone	KCNJ10	tier 2
SGLT2 inhibitor	Dapagliflozin	CD3D	tier 2
SGLT2 inhibitor	Dapagliflozin	CD3E	tier 2
SGLT2 inhibitor	Dapagliflozin	SLC5A4	tier 2
SGLT2 inhibitor	Dapagliflozin	SLC5A2	tier 1
SGLT2 inhibitor	Canagliflozin	SLC5A4	tier 2
SGLT2 inhibitor	Canagliflozin	CD3E	tier 2
SGLT2 inhibitor	Canagliflozin	CD3D	tier 2
SGLT2 inhibitor	Canagliflozin	SLC5A2	tier 1
SGLT2 inhibitor	Empagliflozin	SLC5A2	tier 1
SGLT2 inhibitor	Empagliflozin	SLC5A4	tier 2
SGLT2 inhibitor	Empagliflozin	CD3E	tier 2
SGLT2 inhibitor	Empagliflozin	CD3D	tier 2
SGLT2 inhibitor	Remogliflozin	CD3E	tier 2
SGLT2 inhibitor	Remogliflozin	CD3D	tier 2
meglitinide	Repaglinide	KCNJ11	tier 1
meglitinide	Repaglinide	NOS1AP	tier 2
meglitinide	Repaglinide	ABCC8	tier 1
meglitinide	Repaglinide	SLC30A8	tier 2
meglitinide	Repaglinide	CYP2C8	tier 2
meglitinide	Repaglinide	IGF2BP2	tier 2
meglitinide	Repaglinide	KCNQ1	tier 2
meglitinide	Repaglinide	NR1I2	tier 2
meglitinide	Repaglinide	TCF7L2	tier 2
meglitinide	Repaglinide	KCNJ1	tier 1
meglitinide	Repaglinide	AR	tier 2
meglitinide	Repaglinide	NEUROD1	tier 2
meglitinide	Repaglinide	CYP3A4	tier 2
meglitinide	Repaglinide	ABCC9	tier 2
meglitinide	Nateglinide	CALCA	tier 2
meglitinide	Nateglinide	CYP2C19	tier 2
meglitinide	Nateglinide	ABCC8	tier 1
meglitinide	Nateglinide	CYP1A2	tier 2
meglitinide	Nateglinide	KCNJ1	tier 1
meglitinide	Nateglinide	CYP2C9	tier 2
meglitinide	Nateglinide	CYP3A4	tier 2
meglitinide	Nateglinide	CYP2D6	tier 2
meglitinide	Nateglinide	KCNJ11	tier 1
LYN kinase activator	Tolimidone	LYN	tier 1
LYN kinase activator	Tolimidone	EPS15	tier 2
GLP1-R agonist	Exenatide	KCNQ1	tier 2
GLP1-R agonist	Exenatide	GLP1R	tier 1
GLP1-R agonist	Exenatide	ALPL	tier 2
GLP1-R agonist	Dulaglutide	GLP1R	tier 1
GLP1-R agonist	Dulaglutide	SLCO1B1	tier 2
GLP1-R agonist	Semaglutide	ALPL	tier 2
GLP1-R agonist	Semaglutide	GLP1R	tier 1
GLP1-R agonist	Liraglutide	ALPL	tier 2
GLP1-R agonist	Liraglutide	GLP1R	tier 1
GLP1-R agonist	Lixisenatide	GLP1R	tier 1
GLP1-R agonist	Lixisenatide	ALPL	tier 2
GLP1-R agonist	Albiglutide	GLP1R	tier 1
DDP4 inhibitor	Vildagliptin	FPGS	tier 2
DDP4 inhibitor	Vildagliptin	DPP4	tier 1
DDP4 inhibitor	Vildagliptin	DAPK1	tier 2
DDP4 inhibitor	Vildagliptin	GLP1R	tier 1
DDP4 inhibitor	Vildagliptin	KCNQ1	tier 2
DDP4 inhibitor	Vildagliptin	TRPV4	tier 2
DDP4 inhibitor	Vildagliptin	FPR1	tier 2
DDP4 inhibitor	Sitagliptin	GPR119	tier 2
DDP4 inhibitor	Sitagliptin	GLP1R	tier 1
DDP4 inhibitor	Sitagliptin	DAPK1	tier 2
DDP4 inhibitor	Sitagliptin	KCNQ1	tier 2
DDP4 inhibitor	Sitagliptin	DPP4	tier 1
DDP4 inhibitor	Saxagliptin	DAPK1	tier 2
DDP4 inhibitor	Saxagliptin	DPP4	tier 1
DDP4 inhibitor	Linagliptin	DPP4	tier 1
DDP4 inhibitor	Linagliptin	DAPK1	tier 2
DDP4 inhibitor	Linagliptin	POU2F2	tier 2
DDP4 inhibitor	Alogliptin	DPP4	tier 1
DDP4 inhibitor	Alogliptin	DAPK1	tier 2
DDP4 inhibitor	Teneligliptin	FPGS	tier 2
DDP4 inhibitor	Teneligliptin	FMO3	tier 2
DDP4 inhibitor	Teneligliptin	FPR1	tier 2
DDP4 inhibitor	Teneligliptin	DPP4	tier 1
DDP4 inhibitor	Teneligliptin	DAPK1	tier 2
DDP4 inhibitor	Teneligliptin	CYP3A4	tier 2
DDP4 inhibitor	Gemigliptin	DPP4	tier 1
biguanide	Metformin	PRKAB2	tier 2
biguanide	Metformin	PRKAG2	tier 2
biguanide	Metformin	PPARA	tier 1
biguanide	Metformin	PRKAA2	tier 2
biguanide	Metformin	SLC2A2	tier 2
biguanide	Metformin	SRR	tier 2
biguanide	Metformin	HRAS	tier 2
biguanide	Metformin	PRKAG3	tier 2
biguanide	Metformin	PRKAB1	tier 1
biguanide	Metformin	PRKAA1	tier 2
biguanide	Metformin	IDH1	tier 2
biguanide	Metformin	NR1I2	tier 2
biguanide	Metformin	SLC47A1	tier 2
biguanide	Metformin	CPA6	tier 2
biguanide	Metformin	SLC29A4	tier 2
biguanide	Metformin	PPARG	tier 1
biguanide	Metformin	NRAS	tier 2
biguanide	Metformin	PRPF31	tier 2
biguanide	Metformin	PIK3CA	tier 2
biguanide	Metformin	CSMD1	tier 2
biguanide	Metformin	MAP2K1	tier 2
biguanide	Metformin	TCF7L2	tier 2
biguanide	Metformin	FMO5	tier 2
biguanide	Metformin	KRAS	tier 2
biguanide	Metformin	KCNJ11	tier 1
biguanide	Metformin	CAPN10	tier 2
biguanide	Metformin	NBEA	tier 2
biguanide	Metformin	PTEN	tier 2
biguanide	Metformin	SLC47A2	tier 2
biguanide	Metformin	SLC22A3	tier 2
biguanide	Metformin	IL1B	tier 2
biguanide	Metformin	STK11	tier 2
biguanide	Metformin	IGF1R	tier 2
biguanide	Metformin	ACACB	tier 2
biguanide	Metformin	MTOR	tier 2
biguanide	Metformin	SLC19A3	tier 2
biguanide	Metformin	BDNF	tier 2
biguanide	Metformin	PRKAG1	tier 2
biguanide	Metformin	HNF1B	tier 2
biguanide	Metformin	NDUFA4	tier 2
biguanide	Metformin	NDUFB6	tier 2
biguanide	Metformin	NDUFA9	tier 2
biguanide	Metformin	NDUFB2	tier 2
biguanide	Metformin	NDUFA13	tier 2
biguanide	Metformin	NDUFA3	tier 2
biguanide	Metformin	NDUFV1	tier 2
biguanide	Metformin	NDUFS2	tier 2
biguanide	Metformin	MT-ND4L	tier 2
biguanide	Metformin	MT-ND5	tier 2
biguanide	Metformin	NDUFC1	tier 2
biguanide	Metformin	NDUFA5	tier 2
biguanide	Metformin	NDUFB4	tier 2
biguanide	Metformin	MT-ND3	tier 2
biguanide	Metformin	NDUFS5	tier 2
biguanide	Metformin	GPD2	tier 2
biguanide	Metformin	NDUFC2	tier 2
biguanide	Metformin	NDUFS1	tier 2
biguanide	Metformin	NDUFB5	tier 2
biguanide	Metformin	NDUFA7	tier 2
biguanide	Metformin	NDUFA1	tier 2
biguanide	Metformin	MT-ND4	tier 2
biguanide	Metformin	MT-ND1	tier 2
biguanide	Metformin	NDUFAF4	tier 2
biguanide	Metformin	NDUFB7	tier 2
biguanide	Metformin	NDUFS8	tier 2
biguanide	Metformin	NDUFB8	tier 2
biguanide	Metformin	NDUFS3	tier 2
biguanide	Metformin	NDUFAF2	tier 2
biguanide	Metformin	NDUFA4L2	tier 2
biguanide	Metformin	NDUFB11	tier 2
biguanide	Metformin	MT-ND2	tier 2
biguanide	Metformin	NDUFA6	tier 2
biguanide	Metformin	AR	tier 2
biguanide	Metformin	NDUFV2	tier 2
biguanide	Metformin	NDUFS4	tier 2
biguanide	Metformin	MT-ND6	tier 2
biguanide	Metformin	NDUFA8	tier 2
biguanide	Metformin	NDUFAF3	tier 2
biguanide	Metformin	NDUFB9	tier 2
biguanide	Metformin	NDUFAB1	tier 2
biguanide	Metformin	NDUFB1	tier 2
biguanide	Metformin	NDUFA10	tier 2
biguanide	Metformin	NDUFS6	tier 2
biguanide	Metformin	NDUFAF1	tier 2
biguanide	Metformin	NDUFB3	tier 2
biguanide	Metformin	NDUFA2	tier 2
biguanide	Metformin	NDUFV3	tier 2
biguanide	Metformin	NDUFB10	tier 2
biguanide	Metformin	NDUFS7	tier 2
biguanide	Metformin	NDUFA12	tier 2
biguanide	Metformin	NDUFA11	tier 2

## Sheet: ESM T2. Drug_target_IVs
ESM Table 2. Instrument variables of anti-diabetic drug target genes from GTEx eQTLs
Tissue	Gene_id	Gene_name	Gene_chr	Gene_start	Gene_end	strand	num_var	beta_shape1	beta_shape2	true_df	pval_true_df	variant_id	tss_distance	chr	variant_pos	ref	alt	num_alt_per_site	rs_id_dbSNP151_GRCh38p7	minor_allele_samples	minor_allele_count	maf	ref_factor	pval_nominal	slope	slope_se	pval_perm	pval_beta	qval	pval_nominal_threshold	log2_aFC	log2_aFC_lower	log2_aFC_upper
Adipose_Subcutaneous	ENSG00000168653.10	NDUFS5	chr1	39026318	39034636	+	6847	1.05027	994.344	458.39	8.57649e-66	chr1_39028109_C_T_b38	1791	chr1	39028109	C	T	1	rs76289224	292	347	0.298623	1	3.86904e-73	-0.410959	0.0191814	9.999e-05	6.32724e-66	7.64489e-65	0.000157452	-0.343132	-0.377328	-0.318983
Adipose_Subcutaneous	ENSG00000085832.16	EPS15	chr1	51354263	51519328	-	4443	1.02986	238.778	434.624	1.18888e-71	chr1_51370670_G_A_b38	-148658	chr1	51370670	G	A	1	rs148648502	59	60	0.0516351	1	6.32577e-84	1.21817	0.0515763	9.999e-05	2.51798e-71	3.69956e-70	0.000623497	0.608517	0.559557	0.677466
Adipose_Subcutaneous	ENSG00000243480.7	AMY2A	chr1	103616811	103625780	+	8055	1.04927	470.963	439.178	5.75062e-10	chr1_103489757_T_C_b38	-127054	chr1	103489757	T	C	1	rs78200622	98	102	0.0877797	1	2.30609e-11	0.653632	0.0955946	9.999e-05	1.25827e-07	1.17325e-07	0.000331589	2.09864	1.77763	2.50738
Adipose_Subcutaneous	ENSG00000134184.12	GSTM1	chr1	109687814	109693745	+	6623	1.05496	973.134	452.04	1.36092e-18	chr1_109675302_G_A_b38	-12512	chr1	109675302	G	A	1	rs611951	157	168	0.144578	-1	8.16228e-21	-0.771918	0.0789426	9.999e-05	1.96717e-16	3.52619e-16	0.000162708	-4.85107	-5.45081	-4.27556
Adipose_Subcutaneous	ENSG00000158864.12	NDUFS2	chr1	161197104	161214395	+	7456	1.03677	844.014	449.433	1.04703e-08	chr1_161216523_C_T_b38	19419	chr1	161216523	C	T	1	rs4379692	287	327	0.281411	1	1.04262e-09	-0.1464	0.0235416	9.999e-05	5.66955e-06	4.49917e-06	0.000179486	-0.087791	-0.106528	-0.060669
Adipose_Subcutaneous	ENSG00000007933.12	FMO3	chr1	171090877	171117819	+	7905	1.03268	641.938	446.663	2.15017e-07	chr1_171089111_A_G_b38	-1766	chr1	171089111	A	G	1	rs1736555	305	360	0.309811	1	2.90326e-08	0.232242	0.0412174	0.00029997	0.000101777	7.106e-05	0.000233605	0.426786	0.339097	0.578296
Adipose_Subcutaneous	ENSG00000094963.13	FMO2	chr1	171185208	171211230	+	7658	1.05139	634.193	443.944	1.79102e-10	chr1_171185820_A_G_b38	612	chr1	171185820	A	G	1	rs2020870	82	88	0.0757315	1	7.72571e-12	-0.463251	0.066113	9.999e-05	4.88264e-08	4.74266e-08	0.00024752	-0.847397	-1.24477	-0.662975
Adipose_Subcutaneous	ENSG00000115159.15	GPD2	chr2	156435290	156613735	+	5908	1.03367	594.801	454.748	1.14896e-13	chr2_156464828_C_G_b38	29538	chr2	156464828	C	G	1	rs298253	371	461	0.39673	1	3.58305e-15	0.247666	0.0305106	9.999e-05	3.06261e-11	3.86632e-11	0.000252734	0.181229	0.153147	0.209499
Adipose_Subcutaneous	ENSG00000023228.13	NDUFS1	chr2	206114817	206159584	-	6870	1.03856	979.428	454.972	8.66037e-12	chr2_206145834_G_T_b38	-13750	chr2	206145834	G	T	1	rs6435330	417	560	0.481928	1	4.62884e-13	-0.144772	0.0194877	9.999e-05	4.07349e-09	4.34582e-09	0.000155356	-0.092279	-0.1108	-0.077321
Adipose_Subcutaneous	ENSG00000169047.5	IRS1	chr2	226731317	226799759	-	8539	1.03719	942.277	457.392	1.67236e-15	chr2_226226608_A_ATC_b38	-573151	chr2	226226608	A	ATC	1	rs113832271	309	367	0.315835	-1	3.83866e-17	-0.320739	0.0367707	9.999e-05	5.64427e-13	8.00906e-13	0.000160937	-0.289051	-0.340524	-0.221427
Adipose_Subcutaneous	ENSG00000135917.13	SLC19A3	chr2	227685210	227718012	-	8882	1.04055	940.641	453.138	1.54289e-10	chr2_227718030_G_A_b38	18	chr2	227718030	G	A	1	rs4972919	291	354	0.304647	-1	1.06155e-11	0.135976	0.0195422	9.999e-05	7.52976e-08	7.17911e-08	0.000162553	0.39477	0.299914	0.495367
Adipose_Subcutaneous	ENSG00000130414.11	NDUFA10	chr2	239892450	240025402	-	10077	1.03202	1740.03	463.431	4.25449e-69	chr2_240022777_C_A_b38	-2625	chr2	240022777	C	A	1	rs11679609	325	400	0.344234	1	5.25608e-76	-0.554706	0.0252046	9.999e-05	5.99454e-68	7.7869e-67	8.6049e-05	-0.253127	-0.273891	-0.228637
Adipose_Subcutaneous	ENSG00000142330.19	CAPN10	chr2	240586716	240617705	+	9651	1.04014	1407.71	455.222	3.39553e-19	chr2_240597630_C_T_b38	10914	chr2	240597630	C	T	1	rs56960757	156	166	0.142857	1	2.34601e-21	-0.360554	0.0363195	9.999e-05	1.13991e-16	2.0678e-16	0.000108514	-0.20452	-0.240524	-0.166231
Adipose_Subcutaneous	ENSG00000180767.9	CHST13	chr3	126524283	126543291	+	9352	1.07683	759.671	437.569	2.02483e-45	chr3_126530422_G_A_b38	6139	chr3	126530422	G	A	1	rs744233	293	337	0.290017	1	9.43039e-53	-0.673785	0.0391224	9.999e-05	9.11565e-46	5.87647e-45	0.000219444	-2.63432	-3.04624	-2.22722
Adipose_Subcutaneous	ENSG00000051382.8	PIK3CB	chr3	138652699	138834938	-	5811	1.03843	611.421	454.847	8.99125e-10	chr3_138843468_A_C_b38	8530	chr3	138843468	A	C	1	rs17484361	418	571	0.491394	1	8.36379e-11	-0.159852	0.0240975	9.999e-05	3.10689e-07	2.78953e-07	0.000248769	-0.124744	-0.157759	-0.082515
Adipose_Subcutaneous	ENSG00000109390.11	NDUFC1	chr4	139289917	139302551	-	6947	1.0414	993.756	452.577	4.79459e-12	chr4_139277955_C_T_b38	-24596	chr4	139277955	C	T	1	rs1843943	280	327	0.281411	1	2.06442e-13	0.194547	0.0257795	9.999e-05	2.11687e-09	2.30636e-09	0.000154186	0.08743	0.061206	0.111804
Adipose_Subcutaneous	ENSG00000164258.11	NDUFS4	chr5	53560633	53683340	+	8298	1.03308	739.935	445.254	1.1709e-08	chr5_53608616_GA_G_b38	47983	chr5	53608616	GA	G	1	rs35385197	297	338	0.290878	1	9.90241e-10	-0.167723	0.0269328	9.999e-05	5.80844e-06	4.60335e-06	0.000202871	-0.084022	-0.104314	-0.064384
Adipose_Subcutaneous	ENSG00000164182.10	NDUFAF2	chr5	60945129	61153037	+	6093	1.02453	488.632	445.84	1.66349e-11	chr5_61191495_G_A_b38	246366	chr5	61191495	G	A	1	rs76684719	45	45	0.0387263	1	5.65232e-13	-0.457279	0.0617978	9.999e-05	5.09305e-09	5.38044e-09	0.000300705	-0.364126	-0.447387	-0.278946
Adipose_Subcutaneous	ENSG00000170606.14	HSPA4	chr5	133051962	133106449	+	6836	1.04029	955.952	456.469	2.83322e-14	chr5_133091159_GTT_G_b38	39197	chr5	133091159	GTT	G	1	rs147133967	80	83	0.0714286	1	8.43852e-16	-0.343926	0.041368	9.999e-05	9.98479e-12	1.30093e-11	0.000159848	-0.197788	-0.241383	-0.149981
Adipose_Subcutaneous	ENSG00000133710.15	SPINK5	chr5	148025683	148137289	+	7805	1.01259	890.87	456.918	7.2824e-40	chr5_148089408_G_C_b38	63725	chr5	148089408	G	C	1	rs4529181	347	427	0.37066	-1	2.21633e-44	-0.717008	0.0464633	9.999e-05	2.2597e-37	1.06449e-36	0.000160026	-1.67153	-1.85364	-1.45191
Adipose_Subcutaneous	ENSG00000123545.5	NDUFAF4	chr6	96889313	96897881	-	7110	1.03509	539.557	446.277	9.29337e-27	chr6_96837445_C_G_b38	-60436	chr6	96837445	C	G	1	rs1467687	140	144	0.123924	-1	2.10839e-30	-0.39927	0.0326113	9.999e-05	7.51517e-25	2.05473e-24	0.000279586	-0.329145	-0.379562	-0.282203
Adipose_Subcutaneous	ENSG00000146477.5	SLC22A3	chr6	160348268	160452581	+	8277	1.05283	804.176	441.723	2.65158e-15	chr6_160432254_G_A_b38	83986	chr6	160432254	G	A	1	rs388170	301	393	0.33821	1	1.82606e-17	0.270316	0.0306519	9.999e-05	5.03764e-13	7.17349e-13	0.000195885	0.48556	0.412811	0.59831
Adipose_Subcutaneous	ENSG00000240583.11	AQP1	chr7	30911694	30925516	+	7383	1.02184	981.853	451.205	1.06353e-10	chr7_30896133_T_C_b38	-15561	chr7	30896133	T	C	1	rs1465216	190	237	0.203959	1	6.30144e-12	-0.233883	0.0332306	9.999e-05	7.28229e-08	6.95521e-08	0.000148653	-0.346675	-0.421601	-0.284514
Adipose_Subcutaneous	ENSG00000175445.14	LPL	chr8	19901717	19967258	+	10336	1.0691	1139.25	437.307	4.02234e-07	chr8_19958045_A_G_b38	56328	chr8	19958045	A	G	1	rs287	282	326	0.280551	1	4.28361e-08	0.0984876	0.0177041	9.999e-05	0.000261175	0.000173182	0.000143723	0.255973	0.173654	0.339506
Adipose_Subcutaneous	ENSG00000165264.10	NDUFB6	chr9	32553011	32573184	-	8951	1.05129	819.237	446.801	1.03393e-15	chr9_32573149_C_G_b38	-35	chr9	32573149	C	G	1	rs631678	14	14	0.0120482	1	9.45412e-18	1.04605	0.117486	9.999e-05	1.99065e-13	2.92548e-13	0.000191573	0.539842	0.40187	0.660532
Adipose_Subcutaneous	ENSG00000196730.12	DAPK1	chr9	87497228	87708633	+	8691	1.04503	1003.82	446.002	4.80413e-09	chr9_87544416_A_C_b38	47188	chr9	87544416	A	C	1	rs62562130	97	100	0.0860585	1	3.69701e-10	0.456589	0.0714328	9.999e-05	2.72471e-06	2.22796e-06	0.000153998	0.377248	0.2817	0.457561
Adipose_Subcutaneous	ENSG00000138207.13	RBP4	chr10	93591687	93601744	-	7289	1.03554	808.775	453.026	4.83131e-09	chr10_93598161_A_G_b38	-3583	chr10	93598161	A	G	1	rs7070492	280	335	0.288296	1	5.08383e-10	0.105684	0.0166718	9.999e-05	2.47159e-06	2.02674e-06	0.000186738	0.239243	0.155435	0.345053
Adipose_Subcutaneous	ENSG00000138109.9	CYP2C9	chr10	94938658	94989390	+	7020	1.02078	469.603	443.744	4.23274e-12	chr10_94989863_G_A_b38	51205	chr10	94989863	G	A	1	rs112428369	81	83	0.0714286	1	1.03528e-13	0.731936	0.0957277	9.999e-05	1.2992e-09	1.43644e-09	0.000309946	1.89725	1.52764	2.23824
Adipose_Subcutaneous	ENSG00000099194.5	SCD	chr10	100347124	100364834	+	6191	1.05239	733.59	445.428	5.63048e-09	chr10_100315722_G_A_b38	-31402	chr10	100315722	G	A	1	rs603424	238	290	0.24957	1	4.31928e-10	-0.244574	0.0384179	9.999e-05	2.1085e-06	1.74055e-06	0.000214503	-1.42796	-1.79326	-1.12357
Adipose_Subcutaneous	ENSG00000174775.16	HRAS	chr11	532242	537287	-	6400	1.04811	865.778	452.315	7.07419e-20	chr11_531224_A_G_b38	-6063	chr11	531224	A	G	1	rs12785860	324	396	0.340792	1	2.98199e-22	-0.220649	0.0216944	9.999e-05	9.95266e-18	1.93161e-17	0.000179889	-0.167789	-0.191133	-0.140215
Adipose_Subcutaneous	ENSG00000006071.12	ABCC8	chr11	17392885	17476845	-	6843	1.03561	798.811	453.999	1.66855e-27	chr11_17476510_G_A_b38	-335	chr11	17476510	G	A	1	rs77889556	170	186	0.160069	1	9.4273e-31	0.663932	0.0538572	9.999e-05	1.85253e-25	5.19888e-25	0.0001891	1.5315	1.27262	1.65649
Adipose_Subcutaneous	ENSG00000167792.11	NDUFV1	chr11	67606852	67612535	+	6269	1.0492	557.118	440.812	2.75757e-20	chr11_67592247_A_G_b38	-14605	chr11	67592247	A	G	1	rs6591259	387	491	0.422547	1	2.89424e-23	0.223665	0.0214204	9.999e-05	2.2384e-18	4.49711e-18	0.000280273	0.092886	0.076073	0.107913
Adipose_Subcutaneous	ENSG00000110717.12	NDUFS8	chr11	68030627	68036644	+	7034	1.05379	567.992	432.628	4.64868e-16	chr11_68018929_T_C_b38	-11698	chr11	68018929	T	C	1	rs4244839	260	299	0.257315	1	1.08458e-18	0.172553	0.0188005	9.999e-05	5.43107e-14	8.24582e-14	0.000277963	0.16149	0.133102	0.192444
Adipose_Subcutaneous	ENSG00000151366.12	NDUFC2	chr11	78068352	78080219	-	7061	1.02556	675.495	443.32	1.00197e-17	chr11_78112511_G_A_b38	32292	chr11	78112511	G	A	1	rs624350	307	373	0.320998	-1	3.39708e-20	0.150543	0.0156721	9.999e-05	2.90798e-15	4.83864e-15	0.000218094	0.120521	0.100064	0.139444
Adipose_Subcutaneous	ENSG00000184752.12	NDUFA12	chr12	94897055	95003770	-	8936	1.05063	1104.71	451.741	4.26158e-08	chr12_94995067_T_C_b38	-8703	chr12	94995067	T	C	1	rs11107851	235	265	0.228055	1	5.59738e-09	0.163354	0.0275491	0.00019998	2.78037e-05	2.05777e-05	0.000141847	0.101186	0.074847	0.121696
Adipose_Subcutaneous	ENSG00000111199.10	TRPV4	chr12	109783085	109832735	-	5509	1.04589	525.711	443.856	6.72407e-10	chr12_109839109_C_T_b38	6374	chr12	109839109	C	T	1	rs4766635	369	478	0.41136	-1	3.51118e-11	-0.207731	0.0306772	9.999e-05	1.75234e-07	1.61503e-07	0.000294641	-0.371191	-0.455554	-0.276971
Adipose_Subcutaneous	ENSG00000111725.10	PRKAB1	chr12	119667753	119681630	+	6702	1.0343	887.77	455.022	1.82347e-19	chr12_119671479_AGGCACCTCTTCACAGGAC_A_b38	3726	chr12	119671479	AGGCACCTCTTCACAGGAC	A	1	rs138621699	81	83	0.0714286	1	1.14493e-21	0.548107	0.0547428	9.999e-05	4.58227e-17	8.50337e-17	0.000169603	0.344905	0.282959	0.391021
Adipose_Subcutaneous	ENSG00000172915.18	NBEA	chr13	34942287	35673022	+	7098	1.03476	841.275	455.284	2.99122e-08	chr13_34904903_T_C_b38	-37384	chr13	34904903	T	C	1	rs79575711	26	26	0.0223752	1	4.31565e-09	0.539678	0.0903217	9.999e-05	1.71534e-05	1.29891e-05	0.000179179	0.516681	0.389136	0.60626
Adipose_Subcutaneous	ENSG00000183648.9	NDUFB1	chr14	92116122	92121917	-	8455	1.05376	1131.5	453.974	1.57187e-17	chr14_92121460_A_C_b38	-457	chr14	92121460	A	C	1	rs7143338	330	398	0.342513	1	1.54285e-19	-0.187777	0.0199327	9.999e-05	3.16625e-15	5.25538e-15	0.000139535	-0.166925	-0.194418	-0.133522
Adipose_Subcutaneous	ENSG00000137806.8	NDUFAF1	chr15	41387349	41402519	-	6332	1.04736	543.791	445.528	2.3218e-08	chr15_41402441_G_A_b38	-78	chr15	41402441	G	A	1	rs146883891	44	46	0.0395869	1	2.19134e-09	0.381907	0.0626865	9.999e-05	7.24887e-06	5.69276e-06	0.000285864	0.26598	0.205353	0.34691
Adipose_Subcutaneous	ENSG00000140990.14	NDUFB10	chr16	1959508	1961975	+	8673	1.02675	1352.96	455.771	4.4966e-13	chr16_1960180_G_C_b38	672	chr16	1960180	G	C	1	rs397460	186	211	0.181583	-1	1.7708e-14	0.171956	0.0217773	9.999e-05	3.40902e-10	3.94795e-10	0.000109221	0.116376	0.099577	0.142639
Adipose_Subcutaneous	ENSG00000168447.10	SCNN1B	chr16	23278231	23381299	+	6242	1.02351	1026.77	464.254	1.44388e-07	chr16_23303530_A_C_b38	25299	chr16	23303530	A	C	1	rs1004749	234	249	0.214286	1	3.42311e-08	-0.193969	0.0346105	0.00019998	0.000119283	8.24457e-05	0.00014275	-0.404519	-0.531394	-0.254748
Adipose_Subcutaneous	ENSG00000167720.12	SRR	chr17	2303383	2325260	+	8461	1.0226	1561.17	464.029	3.50921e-68	chr17_2304032_G_A_b38	649	chr17	2304032	G	A	1	rs3744270	298	360	0.309811	1	6.68856e-75	-0.77212	0.0354452	9.999e-05	1.91429e-66	2.36005e-65	9.36733e-05	-0.610906	-0.66314	-0.553481
Adipose_Subcutaneous	ENSG00000171298.12	GAA	chr17	80101556	80119879	+	9997	1.04301	1866.09	463.343	9.48162e-56	chr17_80101663_G_C_b38	107	chr17	80101663	G	C	1	rs2304849	224	248	0.213425	1	2.65501e-61	-0.546348	0.028751	9.999e-05	1.03197e-54	8.83573e-54	8.24368e-05	-0.53562	-0.592407	-0.484892
Adipose_Subcutaneous	ENSG00000174886.12	NDUFA11	chr19	5891276	5904006	-	8886	1.04257	1480	455.446	5.68315e-21	chr19_5895347_C_T_b38	-8659	chr19	5895347	C	T	1	rs72989070	171	183	0.157487	1	2.4508e-23	-0.279871	0.0267543	9.999e-05	1.54858e-18	3.13514e-18	0.000103829	-0.157141	-0.194089	-0.135304
Adipose_Subcutaneous	ENSG00000267855.5	NDUFA7	chr19	8308768	8321396	-	9066	1.03969	1400.83	454.773	8.08451e-08	chr19_8319345_A_G_b38	-2051	chr19	8319345	A	G	1	rs3097182	311	376	0.32358	-1	1.28848e-08	0.119909	0.0207394	9.999e-05	7.76092e-05	5.49146e-05	0.000108926	0.102669	0.069185	0.127677
Adipose_Subcutaneous	ENSG00000105329.9	TGFB1	chr19	41301705	41353911	-	6467	1.03767	876.86	454.947	2.5125e-14	chr19_41319286_C_T_b38	-34625	chr19	41319286	C	T	1	rs73045269	136	148	0.127367	1	6.60623e-16	0.272615	0.0326613	9.999e-05	8.60054e-12	1.12688e-11	0.000173147	0.236261	0.173399	0.307497
Adipose_Subcutaneous	ENSG00000171051.8	FPR1	chr19	51745172	51804110	-	10609	1.01653	1848.13	465.838	4.03089e-11	chr19_51751943_A_G_b38	-52167	chr19	51751943	A	G	1	rs4802859	325	384	0.330465	-1	4.64811e-12	0.184901	0.0260991	9.999e-05	5.63981e-08	5.44145e-08	7.79221e-05	0.556911	0.387807	0.705397
Adipose_Subcutaneous	ENSG00000170906.15	NDUFA3	chr19	54102728	54109257	+	12746	1.03357	2605.76	466.886	1.01578e-41	chr19_54108427_A_G_b38	5699	chr19	54108427	A	G	1	rs75622830	122	129	0.111015	1	1.68513e-45	0.484203	0.0308905	9.999e-05	1.42839e-39	7.38388e-39	5.76826e-05	0.388756	0.338826	0.425916
Adipose_Subcutaneous	ENSG00000105618.13	PRPF31	chr19	54115676	54131719	+	12708	1.03967	2703.96	467.922	4.37696e-08	chr19_54128561_A_G_b38	12885	chr19	54128561	A	G	1	rs667324	441	576	0.495697	1	1.05493e-08	0.16389	0.0281721	9.999e-05	8.12589e-05	5.7383e-05	5.64301e-05	0.06357	0.046051	0.084367
Adipose_Subcutaneous	ENSG00000160194.17	NDUFV3	chr21	42879644	42913304	+	8344	1.04841	1249.53	453.774	9.214e-61	chr21_42903610_C_T_b38	23966	chr21	42903610	C	T	1	rs4148974	59	62	0.0533563	1	3.35651e-68	-0.964444	0.047235	9.999e-05	1.97618e-60	2.00713e-59	0.000124737	-0.673394	-0.7526	-0.596964
Adipose_Subcutaneous	ENSG00000100191.5	SLC5A4	chr22	32218476	32255341	-	8455	1.06037	801.767	442.022	1.70019e-26	chr22_32365481_G_A_b38	110140	chr22	32365481	G	A	1	rs16990269	66	67	0.0576592	1	2.23929e-30	1.12741	0.0921311	9.999e-05	5.52702e-25	1.52562e-24	0.000200046	1.76411	1.59924	1.9432
Adipose_Subcutaneous	ENSG00000184983.9	NDUFA6	chr22	42085525	42090930	-	7183	1.04886	556.223	436.371	1.09401e-70	chr22_42084417_G_A_b38	-6513	chr22	42084417	G	A	1	rs139043947	44	46	0.0395869	1	1.81202e-82	1.20992	0.051878	9.999e-05	3.09386e-71	4.50196e-70	0.000280493	0.876028	0.827022	0.934098
Adipose_Subcutaneous	ENSG00000100197.20	CYP2D6	chr22	42126499	42130906	-	7271	1.04837	562.436	432.928	5.94615e-45	chr22_42115818_G_C_b38	-15088	chr22	42115818	G	C	1	rs2413670	401	519	0.447414	-1	9.54081e-53	0.71372	0.0414437	9.999e-05	3.22742e-44	1.98745e-43	0.000277066	0.985016	0.858611	1.08954
Adipose_Subcutaneous	ENSG00000147123.10	NDUFB11	chrX	47142216	47144868	-	3948	1.03286	535.801	463.318	2.37259e-15	chrX_47222850_G_T_b38	77982	chrX	47222850	G	T	1	rs5953014	214	358	0.308089	-1	8.93759e-17	0.150266	0.0174479	9.999e-05	5.09467e-13	7.24959e-13	0.000279997	0.094684	0.077534	0.115235
Adipose_Subcutaneous	ENSG00000072506.12	HSD17B10	chrX	53431258	53434373	-	2292	1.04676	324.065	452.714	1.04047e-13	chrX_53480223_A_G_b38	45850	chrX	53480223	A	G	1	rs6638394	326	551	0.474182	-1	2.78173e-15	-0.11295	0.0138555	9.999e-05	1.06989e-11	1.39218e-11	0.000478932	-0.089016	-0.105622	-0.066895
Adipose_Subcutaneous	ENSG00000125356.6	NDUFA1	chrX	119871828	119876662	+	4918	1.02499	727.637	458.815	1.73656e-08	chrX_119882436_A_G_b38	10608	chrX	119882436	A	G	1	rs2245167	257	420	0.361446	-1	2.70405e-09	0.0790035	0.0130451	9.999e-05	9.43037e-06	7.33083e-06	0.000202178	0.067458	0.05011	0.082984
Adipose_Visceral_Omentum	ENSG00000168653.10	NDUFS5	chr1	39026318	39034636	+	6847	1.06573	901.976	352.086	4.03875e-56	chr1_39026790_C_T_b38	472	chr1	39026790	C	T	1	rs3768324	217	254	0.270789	1	2.29953e-63	-0.379908	0.0187316	9.999e-05	1.26546e-56	2.82488e-55	0.000110743	-0.379292	-0.421759	-0.347649
Adipose_Visceral_Omentum	ENSG00000085832.16	EPS15	chr1	51354263	51519328	-	4443	1.01416	251.937	345.774	6.60638e-15	chr1_51346258_G_A_b38	-173070	chr1	51346258	G	A	1	rs2185592	43	44	0.0469083	1	5.72087e-17	0.509481	0.0581728	9.999e-05	1.12697e-12	2.96908e-12	0.000341943	0.235196	0.184675	0.288548
Adipose_Visceral_Omentum	ENSG00000134184.12	GSTM1	chr1	109687814	109693745	+	6623	1.05054	965.251	355.496	2.39647e-14	chr1_109675302_G_A_b38	-12512	chr1	109675302	G	A	1	rs611951	116	124	0.132196	-1	6.41391e-16	-0.771149	0.091487	9.999e-05	6.56216e-12	1.62968e-11	9.92007e-05	-4.77048	-5.48573	-3.70754
Adipose_Visceral_Omentum	ENSG00000007933.12	FMO3	chr1	171090877	171117819	+	7905	1.04276	685.975	353.041	1.50375e-24	chr1_171115021_G_A_b38	24144	chr1	171115021	G	A	1	rs2236872	205	238	0.253731	1	1.55031e-27	0.513584	0.0437514	9.999e-05	1.28215e-22	6.40262e-22	0.000136539	0.974563	0.787118	1.11024
Adipose_Visceral_Omentum	ENSG00000094963.13	FMO2	chr1	171185208	171211230	+	7658	1.05383	584.058	343.085	6.68378e-13	chr1_171167180_G_A_b38	-18028	chr1	171167180	G	A	1	rs78893152	64	68	0.0724947	1	9.18969e-15	-0.496615	0.0616424	9.999e-05	1.18782e-10	2.65759e-10	0.000165459	-1.37037	-1.95994	-1.13275
Adipose_Visceral_Omentum	ENSG00000023228.13	NDUFS1	chr2	206114817	206159584	-	6870	1.02475	894.537	352.983	1.02521e-08	chr2_206128409_A_G_b38	-31175	chr2	206128409	A	G	1	rs7570646	340	452	0.481876	1	1.1373e-09	-0.109373	0.0175359	9.999e-05	6.80954e-06	9.26596e-06	9.93889e-05	-0.128023	-0.15918	-0.101739
Adipose_Visceral_Omentum	ENSG00000169047.5	IRS1	chr2	226731317	226799759	-	8539	1.04905	958.638	356.723	4.28337e-11	chr2_226234818_A_G_b38	-564941	chr2	226234818	A	G	1	rs2943646	283	347	0.369936	-1	3.07525e-12	-0.225014	0.0312649	9.999e-05	1.74503e-08	3.16257e-08	9.94661e-05	-0.301863	-0.352291	-0.239788
Adipose_Visceral_Omentum	ENSG00000130414.11	NDUFA10	chr2	239892450	240025402	-	10077	1.0085	1736.02	365.042	2.07349e-42	chr2_240022777_C_A_b38	-2625	chr2	240022777	C	A	1	rs11679609	250	301	0.320896	1	3.38828e-46	-0.360661	0.0221104	9.999e-05	1.68958e-39	1.86469e-38	4.87955e-05	-0.238062	-0.26493	-0.214979
Adipose_Visceral_Omentum	ENSG00000142330.19	CAPN10	chr2	240586716	240617705	+	9651	1.04959	1285.23	351.112	7.64216e-10	chr2_240597630_C_T_b38	10914	chr2	240597630	C	T	1	rs56960757	131	138	0.147122	1	5.42127e-11	-0.243188	0.0360592	9.999e-05	4.84002e-07	7.52701e-07	7.43052e-05	-0.163116	-0.200853	-0.117539
Adipose_Visceral_Omentum	ENSG00000157017.15	GHRL	chr3	10285747	10291451	-	7468	1.01334	1179.16	359.217	1.02778e-11	chr3_10334157_C_G_b38	42706	chr3	10334157	C	G	1	rs35676	264	312	0.332623	-1	7.50795e-13	0.414992	0.0559892	9.999e-05	9.44971e-09	1.76204e-08	7.28912e-05	0.60551	0.431547	0.728104
Adipose_Visceral_Omentum	ENSG00000180767.9	CHST13	chr3	126524283	126543291	+	9352	1.02558	845.734	354.911	1.469e-41	chr3_126530422_G_A_b38	6139	chr3	126530422	G	A	1	rs744233	245	281	0.299574	1	1.64297e-46	-0.697579	0.0425731	9.999e-05	1.31782e-39	1.45849e-38	0.00010538	-2.80597	-3.11516	-2.37957
Adipose_Visceral_Omentum	ENSG00000109390.11	NDUFC1	chr4	139289917	139302551	-	6947	1.03793	944.317	352.028	2.3949e-10	chr4_139498770_G_A_b38	196219	chr4	139498770	G	A	1	rs36109015	173	196	0.208955	1	1.54618e-11	0.237054	0.0341338	9.999e-05	1.24498e-07	2.06492e-07	9.78257e-05	0.117859	0.085576	0.147242
Adipose_Visceral_Omentum	ENSG00000164258.11	NDUFS4	chr5	53560633	53683340	+	8298	1.03378	750.768	350.956	2.233e-09	chr5_53688348_G_A_b38	127715	chr5	53688348	G	A	1	rs56402244	326	437	0.465885	1	1.81058e-10	0.142216	0.0217228	9.999e-05	1.05425e-06	1.56834e-06	0.000121579	0.082738	0.056479	0.104432
Adipose_Visceral_Omentum	ENSG00000164182.10	NDUFAF2	chr5	60945129	61153037	+	6093	1.06025	478.322	345.794	1.94431e-09	chr5_60899792_C_A_b38	-45337	chr5	60899792	C	A	2	rs4647120	33	34	0.0380313	1	1.13126e-10	-0.376553	0.056844	9.999e-05	3.9223e-07	6.16183e-07	0.000205677	-0.373655	-0.451436	-0.250764
Adipose_Visceral_Omentum	ENSG00000133710.15	SPINK5	chr5	148025683	148137289	+	7805	1.04503	903.859	356.996	2.23846e-45	chr5_148086066_T_C_b38	60383	chr5	148086066	T	C	1	rs1363724	277	343	0.365672	-1	1.63227e-50	-0.881396	0.0508932	9.999e-05	2.63046e-44	3.59238e-43	0.000104299	-2.38663	-2.54688	-2.11883
Adipose_Visceral_Omentum	ENSG00000123545.5	NDUFAF4	chr6	96889313	96897881	-	7110	1.04647	538.875	349.047	4.59411e-14	chr6_96822328_C_G_b38	-75553	chr6	96822328	C	G	1	rs75638678	129	130	0.138593	1	7.30082e-16	0.232648	0.0276594	9.999e-05	7.79832e-12	1.92034e-11	0.000175649	0.261039	0.219032	0.299602
Adipose_Visceral_Omentum	ENSG00000146477.5	SLC22A3	chr6	160348268	160452581	+	8277	1.05291	829.505	349.106	1.47502e-16	chr6_160428108_A_T_b38	79840	chr6	160428108	A	T	1	rs2661839	231	288	0.307036	1	1.04917e-18	0.274623	0.0295757	9.999e-05	2.47924e-14	7.34452e-14	0.000116205	0.568241	0.457747	0.654028
Adipose_Visceral_Omentum	ENSG00000090266.12	NDUFB2	chr7	140696821	140706646	+	6210	1.03063	889.494	360.269	1.93589e-09	chr7_140696918_G_A_b38	97	chr7	140696918	G	A	1	rs113951414	18	18	0.0191898	1	2.65026e-10	-0.464461	0.0716367	9.999e-05	1.13175e-06	1.67919e-06	0.000101685	-0.33773	-0.463699	-0.229211
Adipose_Visceral_Omentum	ENSG00000138207.13	RBP4	chr10	93591687	93601744	-	7289	1.02865	822.599	357.191	5.70878e-09	chr10_93600639_G_C_b38	-1105	chr10	93600639	G	C	1	rs116736522	71	74	0.0788913	1	7.41348e-10	-0.211106	0.0334543	9.999e-05	3.26362e-06	4.59156e-06	0.000109321	-0.797691	-1.24578	-0.513167
Adipose_Visceral_Omentum	ENSG00000138115.13	CYP2C8	chr10	95036772	95069497	-	7085	1.05844	448.736	340.475	2.83527e-09	chr10_95241720_T_C_b38	172223	chr10	95241720	T	C	1	rs11188247	140	148	0.157783	1	1.26012e-10	-0.457471	0.0692446	9.999e-05	5.60871e-07	8.64059e-07	0.000218136	-0.979077	-1.82263	-0.693804
Adipose_Visceral_Omentum	ENSG00000099194.5	SCD	chr10	100347124	100364834	+	6191	1.04063	738.648	350.723	3.62164e-09	chr10_100315722_G_A_b38	-31402	chr10	100315722	G	A	1	rs603424	189	221	0.235608	1	3.09048e-10	-0.241342	0.0373716	9.999e-05	1.5605e-06	2.27802e-06	0.000126034	-1.22111	-1.56037	-0.876503
Adipose_Visceral_Omentum	ENSG00000174775.16	HRAS	chr11	532242	537287	-	6400	1.03577	828.432	352.905	1.17707e-09	chr11_545276_G_T_b38	7989	chr11	545276	G	T	1	rs12421239	188	212	0.226013	1	9.86756e-11	-0.181212	0.0272634	9.999e-05	5.85198e-07	8.99251e-07	0.000110818	-0.141562	-0.178584	-0.104406
Adipose_Visceral_Omentum	ENSG00000006071.12	ABCC8	chr11	17392885	17476845	-	6843	1.0194	728.717	351.288	1.37313e-22	chr11_17476510_G_A_b38	-335	chr11	17476510	G	A	1	rs77889556	145	161	0.171642	1	1.93051e-25	0.632654	0.0565716	9.999e-05	4.24659e-20	1.83964e-19	0.000120093	1.38866	1.17002	1.51128
Adipose_Visceral_Omentum	ENSG00000167792.11	NDUFV1	chr11	67606852	67612535	+	6269	1.04869	539.138	342.462	2.70385e-09	chr11_67592247_A_G_b38	-14605	chr11	67592247	A	G	1	rs6591259	313	387	0.41258	1	1.34863e-10	0.153114	0.0232152	9.999e-05	7.41804e-07	1.1239e-06	0.00017667	0.085149	0.060461	0.106201
Adipose_Visceral_Omentum	ENSG00000110717.12	NDUFS8	chr11	68030627	68036644	+	7034	1.04691	563.259	338.799	8.13302e-12	chr11_68029165_T_C_b38	-1462	chr11	68029165	T	C	1	rs15518	192	211	0.224947	1	1.17531e-13	0.134115	0.0174446	9.999e-05	1.8232e-09	3.65011e-09	0.000168256	0.157138	0.129322	0.188239
Adipose_Visceral_Omentum	ENSG00000110092.3	CCND1	chr11	69641087	69654474	+	8325	1.03339	1199.1	358.554	7.3188e-08	chr11_69333804_G_A_b38	-307283	chr11	69333804	G	A	1	rs6606672	265	333	0.355011	-1	1.35432e-08	0.204119	0.0351957	9.999e-05	6.33178e-05	7.65722e-05	7.60383e-05	0.543762	0.392193	0.700028
Adipose_Visceral_Omentum	ENSG00000151366.12	NDUFC2	chr11	78068352	78080219	-	7061	1.06768	639.61	343.144	1.11039e-07	chr11_78057105_A_G_b38	-23114	chr11	78057105	A	G	1	rs6592763	127	140	0.149254	-1	1.04077e-08	0.121799	0.02083	9.999e-05	3.61032e-05	4.49863e-05	0.000157002	0.105205	0.04117	0.13606
Adipose_Visceral_Omentum	ENSG00000184752.12	NDUFA12	chr12	94897055	95003770	-	8936	1.04375	1000.1	349.261	4.23743e-20	chr12_95003776_T_C_b38	6	chr12	95003776	T	C	1	rs835044	273	323	0.34435	-1	9.72756e-23	-0.272696	0.0261072	9.999e-05	7.99125e-18	3.00148e-17	9.39206e-05	-0.186069	-0.22443	-0.151506
Adipose_Visceral_Omentum	ENSG00000111199.10	TRPV4	chr12	109783085	109832735	-	5509	1.03482	526.375	347.411	1.58741e-07	chr12_109833546_A_G_b38	811	chr12	109833546	A	G	1	rs7303725	305	392	0.41791	-1	1.92741e-08	-0.186379	0.032498	9.999e-05	5.93525e-05	7.20422e-05	0.000173924	-0.330566	-0.41925	-0.236943
Adipose_Visceral_Omentum	ENSG00000183648.9	NDUFB1	chr14	92116122	92121917	-	8455	1.04673	1021.53	349.904	6.22071e-13	chr14_92114776_GT_G_b38	-7141	chr14	92114776	GT	G	1	rs35937758	265	312	0.332623	1	1.53634e-14	-0.160967	0.0201636	9.999e-05	2.31427e-10	5.05865e-10	9.27322e-05	-0.135473	-0.169978	-0.114446
Adipose_Visceral_Omentum	ENSG00000137806.8	NDUFAF1	chr15	41387349	41402519	-	6332	1.04063	484.757	342.54	4.78063e-15	chr15_41402441_G_A_b38	-78	chr15	41402441	G	A	1	rs146883891	33	34	0.0362473	1	2.80734e-17	0.582586	0.0658036	9.999e-05	7.66576e-13	2.03525e-12	0.000192035	0.434933	0.353263	0.524575
Adipose_Visceral_Omentum	ENSG00000167720.12	SRR	chr17	2303383	2325260	+	8461	1.03557	1471.95	359.996	2.3565e-56	chr17_2304032_G_A_b38	649	chr17	2304032	G	A	1	rs3744270	236	283	0.301706	1	2.8583e-62	-0.733575	0.0366239	9.999e-05	4.65191e-55	9.69763e-54	6.23356e-05	-0.703684	-0.765475	-0.652921
Adipose_Visceral_Omentum	ENSG00000142494.13	SLC47A1	chr17	19495385	19579034	+	4687	1.05097	481.582	349.943	6.50523e-12	chr17_19524529_CG_C_b38	29144	chr17	19524529	CG	C	1	rs35416333	282	344	0.366738	1	2.22751e-13	-0.453571	0.0597299	9.999e-05	1.12934e-09	2.31629e-09	0.000199057	-0.948997	-1.11481	-0.658422
Adipose_Visceral_Omentum	ENSG00000180638.17	SLC47A2	chr17	19678288	19718979	-	4848	1.05817	469.171	344.449	4.74622e-10	chr17_19716128_G_C_b38	-2851	chr17	19716128	G	C	1	rs4925045	227	259	0.276119	1	2.04286e-11	0.381326	0.0552594	9.999e-05	8.90347e-08	1.50041e-07	0.00020848	0.76975	0.532097	0.965336
Adipose_Visceral_Omentum	ENSG00000171298.12	GAA	chr17	80101556	80119879	+	9997	1.05706	1733.84	356.002	1.15743e-49	chr17_80101663_G_C_b38	107	chr17	80101663	G	C	1	rs2304849	180	201	0.214286	1	1.8802e-55	-0.611001	0.0330973	9.999e-05	4.83116e-49	7.75347e-48	5.62465e-05	-0.64587	-0.715418	-0.575084
Adipose_Visceral_Omentum	ENSG00000174886.12	NDUFA11	chr19	5891276	5904006	-	8886	1.03316	1649.14	364.36	3.24472e-08	chr19_5911957_C_G_b38	7951	chr19	5911957	C	G	1	rs274789	349	459	0.489339	-1	7.25867e-09	0.122824	0.0207751	0.00029997	3.80668e-05	4.72611e-05	5.52519e-05	0.07976	0.056149	0.093464
Adipose_Visceral_Omentum	ENSG00000105329.9	TGFB1	chr19	41301705	41353911	-	6467	1.03866	814.762	352.008	2.32474e-13	chr19_41319286_C_T_b38	-34625	chr19	41319286	C	T	1	rs73045269	116	126	0.134328	1	6.03798e-15	0.295333	0.0363892	9.999e-05	7.8383e-11	1.78207e-10	0.000113618	0.268398	0.213516	0.346209
Adipose_Visceral_Omentum	ENSG00000171051.8	FPR1	chr19	51745172	51804110	-	10609	1.03386	1613.29	357.191	9.65682e-11	chr19_51755312_C_T_b38	-48798	chr19	51755312	C	T	1	rs4802862	254	299	0.318763	-1	7.86239e-12	0.129061	0.0183032	9.999e-05	9.03031e-08	1.52114e-07	5.65943e-05	0.497039	0.358373	0.639713
Adipose_Visceral_Omentum	ENSG00000170906.15	NDUFA3	chr19	54102728	54109257	+	12746	1.05593	2315.68	358.223	2.02174e-26	chr19_54108427_A_G_b38	5699	chr19	54108427	A	G	1	rs75622830	109	116	0.123667	1	3.03768e-29	0.387018	0.0317688	9.999e-05	2.57484e-24	1.42484e-23	4.19819e-05	0.331411	0.287062	0.384328
Adipose_Visceral_Omentum	ENSG00000160194.17	NDUFV3	chr21	42879644	42913304	+	8344	1.04453	1158.08	351.073	7.9551e-50	chr21_42903610_C_T_b38	23966	chr21	42903610	C	T	1	rs4148974	44	45	0.0479744	1	2.16281e-56	-0.946332	0.0506677	9.999e-05	8.05593e-49	1.28244e-47	8.12894e-05	-0.995283	-1.1508	-0.749425
Adipose_Visceral_Omentum	ENSG00000100191.5	SLC5A4	chr22	32218476	32255341	-	8455	1.04379	800.098	348.463	8.60132e-27	chr22_32355018_A_G_b38	99677	chr22	32355018	A	G	1	rs72620407	56	57	0.0607676	1	1.92493e-30	1.23358	0.0987713	9.999e-05	6.53285e-25	3.73306e-24	0.00011741	1.89881	1.72309	2.05552
Adipose_Visceral_Omentum	ENSG00000184983.9	NDUFA6	chr22	42085525	42090930	-	7183	1.04179	500.429	336.578	1.83557e-57	chr22_42090076_G_A_b38	-854	chr22	42090076	G	A	1	rs1989202	36	38	0.0405117	1	8.55372e-68	0.959437	0.0450409	9.999e-05	4.98056e-57	1.1409e-55	0.00018664	0.822665	0.762306	0.910469
Adipose_Visceral_Omentum	ENSG00000100197.20	CYP2D6	chr22	42126499	42130906	-	7271	1.04631	528.615	336.578	3.62085e-30	chr22_42142093_C_T_b38	11187	chr22	42142093	C	T	1	rs3021083	315	408	0.434968	-1	1.86005e-35	0.652717	0.0474959	9.999e-05	1.08581e-28	7.44663e-28	0.000178977	0.939122	0.807986	1.06602
Adipose_Visceral_Omentum	ENSG00000147123.10	NDUFB11	chrX	47142216	47144868	-	3948	1.04799	499.385	357.035	1.73775e-10	chrX_47116835_C_T_b38	-28033	chrX	47116835	C	T	1	rs35801894	204	350	0.373134	-1	1.49813e-11	0.123021	0.0177013	9.999e-05	3.89438e-08	6.82101e-08	0.000190355	0.094539	0.073517	0.115582
Adrenal_Gland	ENSG00000168653.10	NDUFS5	chr1	39026318	39034636	+	6847	1.02152	940.354	175.434	1.34752e-38	chr1_39026790_C_T_b38	472	chr1	39026790	C	T	1	rs3768324	122	143	0.306867	1	2.6855e-42	-0.602194	0.034013	9.999e-05	2.22806e-36	1.22624e-34	4.7092e-05	-0.439139	-0.505045	-0.382491
Adrenal_Gland	ENSG00000134184.12	GSTM1	chr1	109687814	109693745	+	6623	1.04015	992.072	174.755	8.9116e-10	chr1_109675302_G_A_b38	-12512	chr1	109675302	G	A	1	rs611951	64	71	0.152361	-1	1.19031e-10	-0.806803	0.118434	9.999e-05	4.96415e-07	1.83535e-06	4.76537e-05	-5.7917	-6.64386	-4.57474
Adrenal_Gland	ENSG00000131781.12	FMO5	chr1	147175351	147243050	-	6443	1.05048	697.044	173.097	1.02879e-17	chr1_147236081_T_C_b38	-6969	chr1	147236081	T	C	1	rs11239950	169	230	0.493562	-1	1.41262e-19	0.411866	0.0407063	9.999e-05	1.35524e-15	1.32063e-14	7.02644e-05	0.48593	0.430291	0.584005
Adrenal_Gland	ENSG00000198929.12	NOS1AP	chr1	162069774	162370475	+	7637	1.04072	992.436	174.906	8.1348e-12	chr1_162282496_A_AAAT_b38	212722	chr1	162282496	A	AAAT	1	rs144027207	115	137	0.293991	1	6.8705e-13	0.386934	0.0502461	9.999e-05	3.71385e-09	1.81773e-08	4.77301e-05	0.964635	0.805274	1.15769
Adrenal_Gland	ENSG00000094963.13	FMO2	chr1	171185208	171211230	+	7658	1.04166	624.92	169.742	7.95639e-09	chr1_171167180_G_A_b38	-18028	chr1	171167180	G	A	1	rs78893152	34	36	0.0772532	1	7.60171e-10	-0.7377	0.113903	9.999e-05	2.93594e-06	9.63425e-06	7.60443e-05	-2.11261	-3.06018	-1.12238
Adrenal_Gland	ENSG00000197635.9	DPP4	chr2	161992241	162074542	-	5554	1.03223	488.608	173.775	1.75138e-16	chr2_162115829_A_G_b38	41287	chr2	162115829	A	G	1	rs10185053	135	169	0.362661	1	3.8575e-18	0.576539	0.0599396	9.999e-05	3.20001e-14	2.73464e-13	9.41236e-05	1.53968	1.23299	1.77454
Adrenal_Gland	ENSG00000023228.13	NDUFS1	chr2	206114817	206159584	-	6870	1.03615	923.342	172.965	3.95682e-08	chr2_206136541_C_T_b38	-23043	chr2	206136541	C	T	1	rs6435325	163	213	0.457082	1	6.51256e-09	-0.165569	0.0272584	9.999e-05	2.48598e-05	7.08348e-05	5.04956e-05	-0.136859	-0.173796	-0.0983
Adrenal_Gland	ENSG00000130414.11	NDUFA10	chr2	239892450	240025402	-	10077	1.0432	1459.75	172.004	9.81084e-23	chr2_239950974_C_T_b38	-74428	chr2	239950974	C	T	1	rs11684940	54	59	0.126609	1	2.55317e-25	-0.722221	0.0598974	9.999e-05	2.15673e-20	3.33952e-19	3.2729e-05	-0.471611	-0.567654	-0.42926
Adrenal_Gland	ENSG00000180767.9	CHST13	chr3	126524283	126543291	+	9352	1.05467	877.215	173.813	2.41692e-17	chr3_126529005_C_T_b38	4722	chr3	126529005	C	T	1	rs11718493	145	193	0.414163	-1	4.32383e-19	0.700672	0.0704197	9.999e-05	3.70184e-15	3.44869e-14	5.66308e-05	1.82456	1.59214	2.1786
Adrenal_Gland	ENSG00000123545.5	NDUFAF4	chr6	96889313	96897881	-	7110	1.03581	540.034	172.381	8.71299e-08	chr6_96737692_C_T_b38	-160189	chr6	96737692	C	T	1	rs9480900	63	69	0.148069	1	1.48227e-08	0.328287	0.0554962	9.999e-05	3.24247e-05	9.04806e-05	8.62319e-05	0.208527	0.167561	0.25768
Adrenal_Gland	ENSG00000174775.16	HRAS	chr11	532242	537287	-	6400	1.04024	854.279	173.059	3.34754e-10	chr11_524371_C_T_b38	-12916	chr11	524371	C	T	1	rs12418264	42	46	0.0987124	1	3.24988e-11	-0.415654	0.0590274	9.999e-05	1.53263e-07	6.13213e-07	5.53569e-05	-0.232823	-0.337636	-0.162733
Adrenal_Gland	ENSG00000069431.11	ABCC9	chr12	21797401	21942529	-	7905	1.04972	707.975	170.194	1.85195e-14	chr12_21852069_T_G_b38	-90460	chr12	21852069	T	G	1	rs2307024	150	188	0.403433	1	3.37805e-16	-0.639324	0.0716001	9.999e-05	3.69082e-12	2.56173e-11	6.90013e-05	-0.898063	-1.0521	-0.742366
Adrenal_Gland	ENSG00000172915.18	NBEA	chr13	34942287	35673022	+	7098	1.06511	727.16	168.818	1.35052e-11	chr13_35055927_A_G_b38	113640	chr13	35055927	A	G	1	rs9530108	64	71	0.152361	1	4.73832e-13	-0.436728	0.0562596	9.999e-05	2.8725e-09	1.42592e-08	7.07423e-05	-0.397402	-0.493073	-0.313141
Adrenal_Gland	ENSG00000167720.12	SRR	chr17	2303383	2325260	+	8461	1.05047	1391.66	174.02	1.06441e-38	chr17_2304032_G_A_b38	649	chr17	2304032	G	A	1	rs3744270	118	142	0.304721	1	9.6652e-43	-0.633303	0.0354673	9.999e-05	2.53093e-37	1.55333e-35	3.51936e-05	-0.772096	-0.846808	-0.693541
Adrenal_Gland	ENSG00000171298.12	GAA	chr17	80101556	80119879	+	9997	1.03175	1832.75	176.81	3.64215e-24	chr17_80096472_G_GCTA_b38	-5084	chr17	80096472	G	GCTA	1	rs35306116	104	120	0.257511	1	3.10722e-26	-0.499429	0.0404023	9.999e-05	1.50643e-21	2.57253e-20	2.50525e-05	-0.447797	-0.509851	-0.38824
Adrenal_Gland	ENSG00000105329.9	TGFB1	chr19	41301705	41353911	-	6467	1.02842	894.233	175.246	2.29378e-20	chr19_41313919_T_C_b38	-39992	chr19	41313919	T	C	1	rs34945449	74	83	0.178112	1	2.84073e-22	-0.776647	0.0703638	9.999e-05	6.79708e-18	8.23346e-17	5.07471e-05	-0.654734	-0.793384	-0.526681
Adrenal_Gland	ENSG00000171051.8	FPR1	chr19	51745172	51804110	-	10609	1.03707	1785.64	177.564	3.76686e-11	chr19_51755312_C_T_b38	-48798	chr19	51755312	C	T	1	rs4802862	121	147	0.315451	-1	5.37949e-12	0.311264	0.0423317	9.999e-05	3.5882e-08	1.55019e-07	2.61951e-05	0.759769	0.555935	0.917434
Adrenal_Gland	ENSG00000170906.15	NDUFA3	chr19	54102728	54109257	+	12746	1.03612	2453.28	176.866	3.02669e-11	chr19_54109321_G_A_b38	6593	chr19	54109321	G	A	1	rs254262	118	134	0.287554	1	3.85102e-12	0.371631	0.0501524	9.999e-05	4.04001e-08	1.73502e-07	1.90036e-05	0.257317	0.193133	0.29878
Adrenal_Gland	ENSG00000160194.17	NDUFV3	chr21	42879644	42913304	+	8344	1.05194	1121.92	170.666	6.0871e-27	chr21_42903610_C_T_b38	23966	chr21	42903610	C	T	1	rs4148974	24	25	0.0536481	1	2.92756e-30	-1.64221	0.119943	9.999e-05	4.18083e-25	9.20389e-24	4.38729e-05	-0.779162	-0.966712	-0.655394
Adrenal_Gland	ENSG00000184983.9	NDUFA6	chr22	42085525	42090930	-	7183	1.05155	525.765	166.142	9.48745e-26	chr22_42084417_G_A_b38	-6513	chr22	42084417	G	A	1	rs139043947	15	16	0.0343348	1	1.17616e-29	1.10962	0.0822403	9.999e-05	3.45524e-24	7.0687e-23	9.34911e-05	0.740288	0.690377	0.839622
Adrenal_Gland	ENSG00000100197.20	CYP2D6	chr22	42126499	42130906	-	7271	1.04941	508.193	163.993	3.22144e-20	chr22_42138673_C_T_b38	7767	chr22	42138673	C	T	1	rs2743451	165	212	0.454936	-1	1.60303e-23	0.632042	0.055164	9.999e-05	2.37295e-18	3.00752e-17	9.60233e-05	0.924006	0.78691	1.07752
Adrenal_Gland	ENSG00000072506.12	HSD17B10	chrX	53431258	53434373	-	2292	1.02637	346.942	181.183	9.29935e-08	chrX_53504132_C_A_b38	69759	chrX	53504132	C	A	1	rs4830377	132	215	0.461373	-1	3.55257e-08	-0.168777	0.0293838	9.999e-05	2.42844e-05	6.92928e-05	0.000129848	-0.079928	-0.106819	-0.047665
Adrenal_Gland	ENSG00000180772.6	AGTR2	chrX	116170722	116174972	+	5438	1.03188	584.33	176.734	1.75991e-09	chrX_116287912_A_G_b38	117190	chrX	116287912	A	G	1	rs4824319	99	159	0.341202	1	3.17175e-10	-0.440449	0.0663721	9.999e-05	6.53548e-07	2.37129e-06	7.86093e-05	-2.29055	-2.62994	-1.83782
Artery_Aorta	ENSG00000168653.10	NDUFS5	chr1	39026318	39034636	+	6847	1.01691	972.775	287.359	8.99001e-70	chr1_39026790_C_T_b38	472	chr1	39026790	C	T	1	rs3768324	172	198	0.255814	1	8.67288e-77	-0.609782	0.0244361	9.999e-05	6.63501e-68	3.49414e-66	8.97372e-05	-0.490797	-0.541328	-0.45545
Artery_Aorta	ENSG00000085832.16	EPS15	chr1	51354263	51519328	-	4443	1.04119	240.821	271.818	8.10967e-39	chr1_51370670_G_A_b38	-148658	chr1	51370670	G	A	1	rs148648502	42	43	0.0555556	1	5.44215e-45	1.15578	0.0696036	9.999e-05	6.48727e-38	7.22035e-37	0.000388968	0.535399	0.486661	0.59772
Artery_Aorta	ENSG00000134184.12	GSTM1	chr1	109687814	109693745	+	6623	1.05081	955.977	282.823	5.51226e-15	chr1_109675302_G_A_b38	-12512	chr1	109675302	G	A	1	rs611951	100	111	0.143411	-1	1.29419e-16	-0.807371	0.0922801	9.999e-05	1.37738e-12	3.48191e-12	0.000100714	-4.59323	-5.25503	-3.86983
Artery_Aorta	ENSG00000131781.12	FMO5	chr1	147175351	147243050	-	6443	1.0143	643.718	280.656	1.00355e-35	chr1_147225363_C_G_b38	-17687	chr1	147225363	C	G	1	rs2289575	276	359	0.463824	1	3.89764e-40	0.483181	0.0314848	9.999e-05	2.22435e-33	2.03661e-32	0.000134556	0.508882	0.46385	0.573819
Artery_Aorta	ENSG00000007933.12	FMO3	chr1	171090877	171117819	+	7905	1.03112	708.43	284.371	1.53296e-11	chr1_171087103_G_C_b38	-3774	chr1	171087103	G	C	1	rs12401323	116	131	0.169251	1	1.0651e-12	0.472561	0.0636645	9.999e-05	6.05495e-09	1.10723e-08	0.00012847	0.982271	0.766726	1.21691
Artery_Aorta	ENSG00000094963.13	FMO2	chr1	171185208	171211230	+	7658	1.07343	559.608	269.713	1.96316e-10	chr1_171188330_A_C_b38	3122	chr1	171188330	A	C	1	rs12085225	185	216	0.27907	1	5.18151e-12	-0.308582	0.0430141	9.999e-05	3.27828e-08	5.58116e-08	0.000183128	-0.484521	-0.604896	-0.363952
Artery_Aorta	ENSG00000023228.13	NDUFS1	chr2	206114817	206159584	-	6870	1.07414	851.392	276.756	1.93076e-09	chr2_206136541_C_T_b38	-23043	chr2	206136541	C	T	1	rs6435325	283	371	0.479328	1	1.31053e-10	-0.155302	0.0233659	9.999e-05	5.92463e-07	8.79633e-07	0.000120606	-0.102004	-0.124902	-0.079058
Artery_Aorta	ENSG00000130414.11	NDUFA10	chr2	239892450	240025402	-	10077	1.05052	1498.06	282.421	1.07081e-35	chr2_240022777_C_A_b38	-2625	chr2	240022777	C	A	1	rs11679609	216	261	0.337209	1	7.29022e-40	-0.654899	0.0428721	9.999e-05	3.8846e-34	3.7263e-33	6.42194e-05	-0.221553	-0.252414	-0.193128
Artery_Aorta	ENSG00000178057.14	NDUFAF3	chr3	49020459	49023495	+	3237	1.04755	206.198	275.564	2.04121e-07	chr3_48947075_TGG_T_b38	-73384	chr3	48947075	TGG	T	1	rs10541099	223	263	0.339793	-1	2.50177e-08	0.176116	0.0308047	9.999e-05	2.55335e-05	3.16763e-05	0.000462534	0.090157	0.065581	0.112901
Artery_Aorta	ENSG00000180767.9	CHST13	chr3	126524283	126543291	+	9352	1.07053	775.298	276.245	3.50027e-34	chr3_126526007_T_C_b38	1724	chr3	126526007	T	C	1	rs12496524	264	348	0.449612	1	5.56684e-39	-0.63118	0.0419519	9.999e-05	1.83642e-33	1.69527e-32	0.000131149	-2.22138	-2.41947	-1.95415
Artery_Aorta	ENSG00000109390.11	NDUFC1	chr4	139289917	139302551	-	6947	1.04322	1049.46	284.356	2.53639e-09	chr4_139355419_G_C_b38	52868	chr4	139355419	G	C	1	rs13137219	128	141	0.193151	1	3.12552e-10	0.186475	0.0286906	9.999e-05	1.49982e-06	2.13625e-06	8.97945e-05	0.112418	0.08629	0.131893
Artery_Aorta	ENSG00000164258.11	NDUFS4	chr5	53560633	53683340	+	8298	1.04485	734.397	277.731	2.72066e-08	chr5_53731156_A_G_b38	170523	chr5	53731156	A	G	1	rs256092	192	217	0.280362	1	2.86489e-09	-0.178295	0.029165	9.999e-05	1.206e-05	1.55694e-05	0.000128909	-0.113171	-0.138759	-0.071826
Artery_Aorta	ENSG00000133710.15	SPINK5	chr5	148025683	148137289	+	7805	1.03574	786.13	278.722	4.36085e-08	chr5_148074074_T_G_b38	48391	chr5	148074074	T	G	1	rs4472254	229	291	0.375969	-1	5.21668e-09	-0.368604	0.0613754	9.999e-05	2.33759e-05	2.9124e-05	0.00011733	-0.728543	-0.995425	-0.505093
Artery_Aorta	ENSG00000123545.5	NDUFAF4	chr6	96889313	96897881	-	7110	1.05592	538.723	277.623	5.8633e-20	chr6_96887862_A_ATAGAG_b38	-10019	chr6	96887862	A	ATAGAG	1	rs146178235	89	92	0.127778	-1	1.44061e-22	-0.42223	0.039948	9.999e-05	3.68278e-18	1.42282e-17	0.000181284	-0.369157	-0.411591	-0.32823
Artery_Aorta	ENSG00000189043.9	NDUFA4	chr7	10931951	10940256	-	10380	1.04697	873.608	273.026	1.46779e-07	chr7_10935384_T_C_b38	-4872	chr7	10935384	T	C	1	rs218979	142	166	0.21447	1	1.47204e-08	-0.193395	0.0332522	9.999e-05	8.24531e-05	9.52004e-05	0.000109022	-0.141048	-0.167342	-0.106613
Artery_Aorta	ENSG00000254087.7	LYN	chr8	55879813	56014168	+	7973	1.04554	654.315	276.617	2.84093e-10	chr8_55882672_T_C_b38	2859	chr8	55882672	T	C	1	rs1450739	156	175	0.226098	1	1.45112e-11	0.216625	0.0309074	9.999e-05	8.99764e-08	1.4554e-07	0.000144969	0.250815	0.186655	0.304294
Artery_Aorta	ENSG00000196730.12	DAPK1	chr9	87497228	87708633	+	8691	1.04603	1114.36	284.124	9.95512e-09	chr9_87568625_C_T_b38	71397	chr9	87568625	C	T	1	rs9314767	170	200	0.258398	1	1.40799e-09	0.213978	0.0342965	9.999e-05	6.43101e-06	8.5674e-06	8.52427e-05	0.301931	0.227346	0.368491
Artery_Aorta	ENSG00000136877.14	FPGS	chr9	127794597	127814327	+	5342	1.02589	623.921	278.598	7.76276e-12	chr9_127793005_A_G_b38	-1592	chr9	127793005	A	G	1	rs1054775	247	305	0.394057	1	2.87692e-13	-0.219416	0.0287785	9.999e-05	2.91746e-09	5.48451e-09	0.000143663	-0.113264	-0.135871	-0.087109
Artery_Aorta	ENSG00000138115.13	CYP2C8	chr10	95036772	95069497	-	7085	1.03555	457.512	274.573	4.23003e-14	chr10_95237913_A_G_b38	168416	chr10	95237913	A	G	1	rs1049921	140	150	0.193798	1	4.7655e-16	-0.657303	0.0767399	9.999e-05	7.92827e-12	1.88917e-11	0.000201483	-1.14796	-1.53662	-0.899867
Artery_Aorta	ENSG00000148737.16	TCF7L2	chr10	112950250	113167678	+	6250	1.01669	1089.88	288.442	6.91074e-17	chr10_113008850_A_G_b38	58600	chr10	113008850	A	G	1	rs6585200	282	382	0.49354	-1	2.08219e-18	-0.339368	0.0364234	9.999e-05	4.51636e-14	1.29196e-13	8.00432e-05	-0.196974	-0.22465	-0.16355
Artery_Aorta	ENSG00000174775.16	HRAS	chr11	532242	537287	-	6400	1.03896	892.826	284.712	1.71324e-30	chr11_539646_G_T_b38	2359	chr11	539646	G	T	1	rs1870725	200	239	0.308786	1	9.14753e-34	-0.367868	0.0269088	9.999e-05	1.35647e-28	9.75597e-28	0.00010427	-0.243474	-0.275724	-0.2109
Artery_Aorta	ENSG00000187486.5	KCNJ11	chr11	17385859	17389331	-	6662	1.05148	688.473	277.808	9.35859e-27	chr11_17386478_A_G_b38	-2853	chr11	17386478	A	G	1	rs2285676	241	296	0.382429	1	2.65756e-30	0.511034	0.0401129	9.999e-05	4.03045e-25	2.38684e-24	0.000140105	1.1045	0.981552	1.23806
Artery_Aorta	ENSG00000006071.12	ABCC8	chr11	17392885	17476845	-	6843	1.02737	745.931	283.257	3.0378e-47	chr11_17476510_G_A_b38	-335	chr11	17476510	G	A	1	rs77889556	121	132	0.170543	1	1.14286e-52	1.2037	0.0647643	9.999e-05	1.43069e-45	2.43517e-44	0.000120687	3.88894	3.59161	4.17498
Artery_Aorta	ENSG00000167792.11	NDUFV1	chr11	67606852	67612535	+	6269	1.04159	569.447	275.533	1.28614e-08	chr11_67638652_T_C_b38	31800	chr11	67638652	T	C	1	rs10896190	283	376	0.485788	-1	1.04996e-09	-0.192424	0.0305899	9.999e-05	4.39873e-06	5.97669e-06	0.000164711	-0.069741	-0.0876	-0.052646
Artery_Aorta	ENSG00000151366.12	NDUFC2	chr11	78068352	78080219	-	7061	1.05739	659.963	275.301	7.17592e-08	chr11_78117779_T_A_b38	37560	chr11	78117779	T	A	1	rs7111745	111	122	0.157623	1	7.42706e-09	-0.180549	0.0303872	9.999e-05	2.60738e-05	3.23058e-05	0.000148592	-0.107779	-0.146784	-0.072959
Artery_Aorta	ENSG00000172915.18	NBEA	chr13	34942287	35673022	+	7098	1.03822	799.397	280.3	2.7459e-11	chr13_34152461_G_A_b38	-789826	chr13	34152461	G	A	1	rs9539871	37	37	0.0478036	1	1.41194e-12	-0.741439	0.100483	9.999e-05	1.10024e-08	1.96791e-08	0.000116209	-0.719321	-0.972053	-0.470575
Artery_Aorta	ENSG00000137806.8	NDUFAF1	chr15	41387349	41402519	-	6332	1.05245	474.968	271.122	1.0811e-12	chr15_41402441_G_A_b38	-78	chr15	41402441	G	A	1	rs146883891	38	39	0.0503876	1	1.36452e-14	0.520708	0.0644366	9.999e-05	1.63425e-10	3.45551e-10	0.000203629	0.394928	0.298844	0.46001
Artery_Aorta	ENSG00000167720.12	SRR	chr17	2303383	2325260	+	8461	1.02658	1476.93	288.164	1.6895e-63	chr17_2304032_G_A_b38	649	chr17	2304032	G	A	1	rs3744270	194	233	0.301034	1	1.11785e-69	-0.777195	0.0337388	9.999e-05	6.42804e-62	2.39965e-60	6.08154e-05	-0.975719	-1.04527	-0.887659
Artery_Aorta	ENSG00000142494.13	SLC47A1	chr17	19495385	19579034	+	4687	1.03342	481.746	281.632	8.33259e-12	chr17_19524529_CG_C_b38	29144	chr17	19524529	CG	C	1	rs35416333	220	269	0.347545	1	4.17477e-13	-0.410506	0.0542473	9.999e-05	2.07345e-09	3.95567e-09	0.000190177	-0.672362	-0.867508	-0.527053
Artery_Aorta	ENSG00000171298.12	GAA	chr17	80101556	80119879	+	9997	1.04414	1666.73	283.118	1.57176e-24	chr17_80101663_G_C_b38	107	chr17	80101663	G	C	1	rs2304849	164	181	0.23385	1	2.83067e-27	-0.547803	0.0460012	9.999e-05	3.17327e-22	1.59715e-21	5.66888e-05	-0.439967	-0.552857	-0.385655
Artery_Aorta	ENSG00000171051.8	FPR1	chr19	51745172	51804110	-	10609	1.03706	1522.86	281.972	1.44675e-09	chr19_51753248_A_G_b38	-50862	chr19	51753248	A	G	1	rs4801892	210	252	0.325581	-1	1.40265e-10	0.176557	0.0266095	9.999e-05	1.33795e-06	1.91558e-06	6.08012e-05	0.5178	0.378726	0.679844
Artery_Aorta	ENSG00000170906.15	NDUFA3	chr19	54102728	54109257	+	12746	1.0383	2440.89	288.628	3.89774e-20	chr19_54108427_A_G_b38	5699	chr19	54108427	A	G	1	rs75622830	79	84	0.108527	1	5.81721e-22	0.49308	0.0474491	9.999e-05	2.27807e-17	8.35683e-17	3.80695e-05	0.325631	0.289131	0.3781
Artery_Aorta	ENSG00000160194.17	NDUFV3	chr21	42879644	42913304	+	8344	1.0364	1346.49	288.535	5.72025e-64	chr21_42903610_C_T_b38	23966	chr21	42903610	C	T	1	rs4148974	48	51	0.0658915	1	4.16094e-70	-1.33218	0.0575451	9.999e-05	4.91791e-63	1.99497e-61	6.86344e-05	-1.04789	-1.20749	-0.911666
Artery_Aorta	ENSG00000100191.5	SLC5A4	chr22	32218476	32255341	-	8455	1.0412	774.428	277.731	8.45373e-10	chr22_32357826_T_A_b38	102485	chr22	32357826	T	A	1	rs2899185	53	56	0.0723514	1	5.51394e-11	0.655707	0.0965597	9.999e-05	3.57646e-07	5.44812e-07	0.000120983	1.15468	0.888117	1.41656
Artery_Aorta	ENSG00000184983.9	NDUFA6	chr22	42085525	42090930	-	7183	1.04698	487.125	266.942	1.96363e-62	chr22_42155833_T_C_b38	64903	chr22	42155833	T	C	1	rs4822094	30	30	0.0388601	-1	8.18459e-74	-1.55712	0.0644879	9.999e-05	1.58142e-62	6.17357e-61	0.000195513	-0.921912	-0.986628	-0.880653
Artery_Aorta	ENSG00000100197.20	CYP2D6	chr22	42126499	42130906	-	7271	1.07211	485.402	263.228	2.78397e-26	chr22_42094288_A_C_b38	-36618	chr22	42094288	A	C	1	rs5758578	262	330	0.426357	-1	2.54427e-31	0.661997	0.0508611	9.999e-05	2.93557e-25	1.74901e-24	0.000210363	1.05404	0.925746	1.20084
Artery_Aorta	ENSG00000147123.10	NDUFB11	chrX	47142216	47144868	-	3948	1.05675	472.612	284.603	5.27124e-11	chrX_47112223_T_C_b38	-32645	chrX	47112223	T	C	1	rs13440535	161	264	0.341085	1	4.29392e-12	-0.152383	0.0211532	9.999e-05	8.99598e-09	1.62459e-08	0.000207117	-0.083541	-0.102618	-0.059411
Artery_Aorta	ENSG00000180772.6	AGTR2	chrX	116170722	116174972	+	5438	1.02291	656.217	291.739	3.9285e-13	chrX_116306981_G_T_b38	136259	chrX	116306981	G	T	1	rs2145200	163	258	0.333333	1	3.84259e-14	-0.365724	0.0461321	9.999e-05	1.53939e-10	3.26197e-10	0.000135404	-1.52523	-1.85291	-1.22635
Artery_Coronary	ENSG00000168653.10	NDUFS5	chr1	39026318	39034636	+	6847	1.04025	931.701	156.562	4.01851e-21	chr1_38993209_C_G_b38	-33109	chr1	38993209	C	G	1	rs11205515	155	203	0.476526	-1	3.53364e-23	0.399866	0.0346856	9.999e-05	7.31582e-19	1.55338e-17	3.6362e-05	0.368319	0.314685	0.438324
Artery_Coronary	ENSG00000085832.16	EPS15	chr1	51354263	51519328	-	4443	1.05953	243.545	149.263	1.76662e-11	chr1_51370670_G_A_b38	-148658	chr1	51370670	G	A	1	rs148648502	28	28	0.0657277	1	4.46453e-13	0.841862	0.107404	9.999e-05	1.33132e-09	1.04644e-08	0.000149351	0.382746	0.275927	0.45882
Artery_Coronary	ENSG00000134184.12	GSTM1	chr1	109687814	109693745	+	6623	1.05369	966.602	155.801	2.04061e-09	chr1_109675302_G_A_b38	-12512	chr1	109675302	G	A	1	rs611951	47	51	0.119718	-1	2.65428e-10	-0.932631	0.138972	9.999e-05	9.51681e-07	4.88929e-06	3.68419e-05	-5.17221	-5.99563	-4.18293
Artery_Coronary	ENSG00000131781.12	FMO5	chr1	147175351	147243050	-	6443	1.05173	680.333	154.129	4.96276e-09	chr1_147242631_G_C_b38	-419	chr1	147242631	G	C	1	rs1890041	153	202	0.474178	-1	5.74801e-10	0.347505	0.0529092	9.999e-05	1.72016e-06	8.50815e-06	5.19674e-05	0.405478	0.305002	0.503283
Artery_Coronary	ENSG00000023228.13	NDUFS1	chr2	206114817	206159584	-	6870	1.01926	917.769	156.646	4.63569e-10	chr2_206171593_C_T_b38	12009	chr2	206171593	C	T	1	rs59621362	157	210	0.492958	-1	5.78781e-11	-0.235247	0.0336647	9.999e-05	3.181e-07	1.76509e-06	3.40674e-05	-0.179943	-0.213031	-0.137919
Artery_Coronary	ENSG00000130414.11	NDUFA10	chr2	239892450	240025402	-	10077	1.04417	1738.55	159.501	4.58459e-16	chr2_240022777_C_A_b38	-2625	chr2	240022777	C	A	1	rs11679609	121	147	0.34507	1	2.67988e-17	-0.51819	0.0549454	9.999e-05	2.28416e-13	2.79994e-12	1.9775e-05	-0.226348	-0.269496	-0.176321
Artery_Coronary	ENSG00000180767.9	CHST13	chr3	126524283	126543291	+	9352	1.0587	774.213	152.625	2.87354e-15	chr3_126529005_C_T_b38	4722	chr3	126529005	C	T	1	rs11718493	138	186	0.43662	-1	4.15645e-17	0.587362	0.0627442	9.999e-05	4.48712e-13	5.3342e-12	4.68462e-05	1.99966	1.7604	2.38829
Artery_Coronary	ENSG00000133710.15	SPINK5	chr5	148025683	148137289	+	7805	1.05716	846.393	154.72	3.35872e-11	chr5_148089408_G_C_b38	63725	chr5	148089408	G	C	1	rs4529181	128	157	0.372038	-1	2.35252e-12	-0.65234	0.0863681	9.999e-05	1.02672e-08	7.13396e-08	4.26116e-05	-1.48855	-1.78115	-1.12715
Artery_Coronary	ENSG00000123545.5	NDUFAF4	chr6	96889313	96897881	-	7110	1.0467	536.857	153.183	7.18117e-09	chr6_96840127_A_G_b38	-57754	chr6	96840127	A	G	1	rs6568631	52	54	0.126761	-1	7.71473e-10	-0.317143	0.0486935	9.999e-05	2.11048e-06	1.02501e-05	6.46414e-05	-0.348374	-0.406745	-0.239073
Artery_Coronary	ENSG00000174775.16	HRAS	chr11	532242	537287	-	6400	1.04603	883.134	156.021	1.21121e-12	chr11_524397_T_C_b38	-12890	chr11	524397	T	C	1	rs4963184	110	137	0.321596	1	7.33103e-14	-0.316813	0.0389049	9.999e-05	4.05125e-10	3.38988e-09	3.9199e-05	-0.241133	-0.296023	-0.189347
Artery_Coronary	ENSG00000006071.12	ABCC8	chr11	17392885	17476845	-	6843	1.06023	744.721	154.061	5.12558e-21	chr11_17476510_G_A_b38	-335	chr11	17476510	G	A	1	rs77889556	67	70	0.164319	1	2.06885e-23	1.07385	0.0924947	9.999e-05	3.31926e-19	7.30105e-18	4.89728e-05	3.16041	2.73449	3.58124
Artery_Coronary	ENSG00000167792.11	NDUFV1	chr11	67606852	67612535	+	6269	1.06479	561.518	151.172	9.62537e-09	chr11_67607713_T_G_b38	861	chr11	67607713	T	G	1	rs7948073	150	191	0.448357	1	8.32022e-10	0.301311	0.0463632	9.999e-05	2.39368e-06	1.15543e-05	6.60289e-05	0.126788	0.092311	0.17207
Artery_Coronary	ENSG00000167720.12	SRR	chr17	2303383	2325260	+	8461	1.07124	1354.6	155.227	3.36754e-27	chr17_2246131_A_C_b38	-57252	chr17	2246131	A	C	1	rs1555569	110	129	0.302817	1	3.92868e-30	-0.783984	0.0561859	9.999e-05	9.60385e-26	3.97874e-24	2.80121e-05	-0.937767	-1.07245	-0.81675
Artery_Coronary	ENSG00000171298.12	GAA	chr17	80101556	80119879	+	9997	1.03899	1849.35	158.994	9.45962e-15	chr17_80102793_A_C_b38	1237	chr17	80102793	A	C	1	rs12450199	126	163	0.382629	1	6.40833e-16	-0.403223	0.0451918	9.999e-05	6.5473e-12	6.81959e-11	1.8233e-05	-0.387526	-0.472831	-0.307635
Artery_Coronary	ENSG00000170906.15	NDUFA3	chr19	54102728	54109257	+	12746	1.03035	2616.35	159.62	6.04427e-12	chr19_54108427_A_G_b38	5699	chr19	54108427	A	G	1	rs75622830	44	47	0.110329	1	7.95351e-13	0.502127	0.0648767	9.999e-05	9.04838e-09	6.34711e-08	1.24726e-05	0.34273	0.274382	0.415911
Artery_Coronary	ENSG00000160194.17	NDUFV3	chr21	42879644	42913304	+	8344	1.06073	1320.67	157.423	2.63199e-21	chr21_42903610_C_T_b38	23966	chr21	42903610	C	T	1	rs4148974	20	20	0.0469484	1	2.91604e-23	-1.1494	0.0994496	9.999e-05	2.94496e-19	6.51676e-18	2.76665e-05	-0.938367	-1.11369	-0.746065
Artery_Coronary	ENSG00000100191.5	SLC5A4	chr22	32218476	32255341	-	8455	1.04015	855.978	155.295	1.70329e-07	chr22_32359006_C_T_b38	103665	chr22	32359006	C	T	1	rs5754009	28	30	0.0704225	1	3.38899e-08	0.649851	0.112407	9.999e-05	0.00010049	0.000361895	3.95638e-05	1.4514	1.15713	1.74899
Artery_Coronary	ENSG00000184983.9	NDUFA6	chr22	42085525	42090930	-	7183	1.07224	528.282	148.385	1.81829e-16	chr22_42084417_G_A_b38	-6513	chr22	42084417	G	A	1	rs139043947	10	10	0.0234742	1	5.98705e-19	1.05892	0.105581	9.999e-05	1.06702e-14	1.51528e-13	7.20791e-05	0.780165	0.650047	0.902657
Artery_Coronary	ENSG00000100197.20	CYP2D6	chr22	42126499	42130906	-	7271	1.06049	555.341	148.638	4.76833e-14	chr22_42142093_C_T_b38	11187	chr22	42142093	C	T	1	rs3021083	151	195	0.457746	-1	4.14337e-16	0.589971	0.0656042	9.999e-05	5.90908e-12	6.17818e-11	6.57338e-05	1.01183	0.839108	1.23577
Artery_Tibial	ENSG00000168653.10	NDUFS5	chr1	39026318	39034636	+	6847	1.05114	951.002	458.697	3.07082e-88	chr1_39031147_G_A_b38	4829	chr1	39031147	G	A	1	rs10888639	281	322	0.275685	1	1.17427e-98	-0.457879	0.0172168	9.999e-05	1.35762e-89	3.17687e-88	0.00016478	-0.407837	-0.449115	-0.384662
Artery_Tibial	ENSG00000085832.16	EPS15	chr1	51354263	51519328	-	4443	1.02161	242.536	439.598	4.72919e-47	chr1_51370670_G_A_b38	-148658	chr1	51370670	G	A	1	rs148648502	62	63	0.0539384	1	1.01215e-54	0.940883	0.0533903	9.999e-05	1.27662e-45	7.2288e-45	0.000600563	0.464815	0.412282	0.526568
Artery_Tibial	ENSG00000243480.7	AMY2A	chr1	103616811	103625780	+	8055	1.05331	454.109	438.193	2.48751e-07	chr1_103489757_T_C_b38	-127054	chr1	103489757	T	C	1	rs78200622	102	107	0.0916096	1	2.3031e-08	0.51886	0.0914081	9.999e-05	6.79734e-05	4.60694e-05	0.000346851	1.77823	1.41294	2.1688
Artery_Tibial	ENSG00000134184.12	GSTM1	chr1	109687814	109693745	+	6623	1.05451	1022.71	457.794	1.4796e-25	chr1_109675302_G_A_b38	-12512	chr1	109675302	G	A	1	rs611951	155	169	0.144692	-1	1.70371e-28	-0.865308	0.0734981	9.999e-05	9.55291e-24	2.3173e-23	0.000154475	-4.63305	-5.17087	-3.99897
Artery_Tibial	ENSG00000131791.7	PRKAB2	chr1	147155106	147172550	-	6380	1.02954	691.483	454.857	5.67614e-09	chr1_147322367_G_A_b38	149817	chr1	147322367	G	A	1	rs374811282	206	231	0.197774	1	5.88011e-10	-0.18062	0.0286055	9.999e-05	2.68302e-06	2.11773e-06	0.000214927	-0.174685	-0.212848	-0.132607
Artery_Tibial	ENSG00000131781.12	FMO5	chr1	147175351	147243050	-	6443	1.02998	719.23	455.347	2.57168e-11	chr1_147225879_T_C_b38	-17171	chr1	147225879	T	C	1	rs2354431	425	559	0.478596	1	1.37861e-12	0.220095	0.030289	9.999e-05	1.07055e-08	1.03703e-08	0.000206863	0.278923	0.224031	0.351424
Artery_Tibial	ENSG00000158864.12	NDUFS2	chr1	161197104	161214395	+	7456	1.04565	831.402	451.319	1.05796e-07	chr1_161196933_G_T_b38	-171	chr1	161196933	G	T	1	rs35630547	121	125	0.107021	1	1.39462e-08	-0.253671	0.0439871	9.999e-05	5.6295e-05	3.85579e-05	0.000185993	-0.121673	-0.168824	-0.052645
Artery_Tibial	ENSG00000094963.13	FMO2	chr1	171185208	171211230	+	7658	1.03974	685.421	454.832	1.5082e-18	chr1_171198018_C_T_b38	12810	chr1	171198018	C	T	1	rs10912542	407	529	0.452911	1	9.29036e-21	-0.386198	0.039569	9.999e-05	2.57868e-16	4.30149e-16	0.000222367	-0.753953	-0.893227	-0.550799
Artery_Tibial	ENSG00000115159.15	GPD2	chr2	156435290	156613735	+	5908	1.04081	527.843	446.324	2.38912e-13	chr2_156437479_A_G_b38	2189	chr2	156437479	A	G	1	rs298305	371	457	0.391267	1	3.80119e-15	0.215402	0.0265673	9.999e-05	4.88696e-11	5.73277e-11	0.000289497	0.147164	0.107249	0.183882
Artery_Tibial	ENSG00000023228.13	NDUFS1	chr2	206114817	206159584	-	6870	1.05922	921.341	451.657	3.0759e-28	chr2_206128713_T_A_b38	-30871	chr2	206128713	T	A	1	rs7558619	416	557	0.498211	1	6.55711e-32	-0.236862	0.0187993	9.999e-05	9.71176e-27	2.70752e-26	0.000173409	-0.1254	-0.138982	-0.106186
Artery_Tibial	ENSG00000138413.13	IDH1	chr2	208236227	208266074	-	7541	1.02483	702.575	451.657	8.31759e-08	chr2_208259669_T_G_b38	-6405	chr2	208259669	T	G	1	rs59522113	134	143	0.122432	1	1.07496e-08	0.225807	0.0388417	9.999e-05	4.53851e-05	3.14365e-05	0.000209056	0.212446	0.135995	0.27201
Artery_Tibial	ENSG00000135917.13	SLC19A3	chr2	227685210	227718012	-	8882	1.0258	968.679	458.082	5.71701e-15	chr2_227715251_C_CGCA_b38	-2761	chr2	227715251	C	CGCA	1	rs146692568	167	185	0.167269	1	1.301e-16	-0.408669	0.0477354	9.999e-05	2.80592e-12	3.57906e-12	0.000152001	-1.038	-1.53445	-0.722681
Artery_Tibial	ENSG00000130414.11	NDUFA10	chr2	239892450	240025402	-	10077	1.02932	1615.42	458.911	9.27762e-50	chr2_240027895_G_A_b38	2493	chr2	240027895	G	A	1	rs10166776	346	432	0.369863	1	1.5979e-55	-0.543821	0.0305688	9.999e-05	6.70651e-48	4.10038e-47	9.19561e-05	-0.201317	-0.238532	-0.180807
Artery_Tibial	ENSG00000142330.19	CAPN10	chr2	240586716	240617705	+	9651	1.0326	1414.91	458.647	5.4593e-14	chr2_240598644_T_C_b38	11928	chr2	240598644	T	C	1	rs55878652	161	174	0.148973	1	1.69571e-15	-0.280692	0.0341562	9.999e-05	3.56479e-11	4.22086e-11	0.000105847	-0.17942	-0.219852	-0.151248
Artery_Tibial	ENSG00000157017.15	GHRL	chr3	10285747	10291451	-	7468	1.04075	1146.24	455.133	1.38193e-10	chr3_10306023_G_A_b38	14572	chr3	10306023	G	A	1	rs154235	311	373	0.319349	-1	9.05845e-12	0.319768	0.0458019	9.999e-05	8.22157e-08	7.42243e-08	0.000133307	0.504476	0.37864	0.608007
Artery_Tibial	ENSG00000180767.9	CHST13	chr3	126524283	126543291	+	9352	1.04884	783.446	445.496	6.4774e-47	chr3_126529005_C_T_b38	4722	chr3	126529005	C	T	1	rs11718493	381	501	0.428938	-1	7.31376e-54	0.640362	0.0367116	9.999e-05	3.81634e-46	2.19946e-45	0.000198909	2.24174	2.05389	2.52904
Artery_Tibial	ENSG00000114770.16	ABCC5	chr3	183919934	184018015	-	7604	1.04276	1160.92	464.194	2.11367e-07	chr3_183938321_C_T_b38	-79694	chr3	183938321	C	T	1	rs11714326	188	203	0.173801	1	4.74456e-08	0.120196	0.0216822	0.00019998	0.000168776	0.000109364	0.00013227	0.130204	0.088719	0.161018
Artery_Tibial	ENSG00000109390.11	NDUFC1	chr4	139289917	139302551	-	6947	1.04366	1097.94	460.68	5.87842e-10	chr4_139488766_T_C_b38	186215	chr4	139488766	T	C	1	rs12644042	384	484	0.414384	1	6.04407e-11	-0.102522	0.015337	9.999e-05	3.39865e-07	2.91132e-07	0.000140164	-0.070123	-0.091422	-0.050175
Artery_Tibial	ENSG00000164258.11	NDUFS4	chr5	53560633	53683340	+	8298	1.03835	762.642	451.959	3.49978e-10	chr5_53633966_G_A_b38	73333	chr5	53633966	G	A	1	rs2636993	298	340	0.291096	1	2.1995e-11	-0.151226	0.022096	9.999e-05	1.46898e-07	1.30139e-07	0.000199173	-0.119932	-0.146092	-0.097781
Artery_Tibial	ENSG00000164182.10	NDUFAF2	chr5	60945129	61153037	+	6093	1.04156	480.756	444.555	2.86899e-07	chr5_61043176_C_T_b38	98047	chr5	61043176	C	T	1	rs111907940	43	44	0.0376712	1	3.41778e-08	-0.327451	0.0584305	0.00019998	9.36141e-05	6.25167e-05	0.00031843	-0.277948	-0.368912	-0.2088
Artery_Tibial	ENSG00000112164.5	GLP1R	chr6	39048798	39087743	+	7753	1.04974	842.725	450.39	4.35989e-16	chr6_39088374_C_A_b38	39576	chr6	39088374	C	A	1	rs10305525	85	93	0.0796233	1	3.82956e-18	0.61086	0.0677466	9.999e-05	8.65461e-14	1.22397e-13	0.000185322	2.03731	1.66975	2.38268
Artery_Tibial	ENSG00000123545.5	NDUFAF4	chr6	96889313	96897881	-	7110	1.02577	566.49	453.264	8.67681e-46	chr6_96856559_C_G_b38	-41322	chr6	96856559	C	G	1	rs1359930	146	151	0.129281	-1	1.08324e-51	-0.482971	0.0284321	9.999e-05	3.94946e-44	2.14067e-43	0.000259881	-0.422719	-0.455321	-0.379579
Artery_Tibial	ENSG00000146477.5	SLC22A3	chr6	160348268	160452581	+	8277	1.03714	890.177	453.402	2.31245e-13	chr6_160456608_G_A_b38	108340	chr6	160456608	G	A	1	rs2457564	365	455	0.389555	1	5.98298e-15	-0.25907	0.0322009	9.999e-05	8.8476e-11	1.0166e-10	0.000170133	-0.318777	-0.386525	-0.255637
Artery_Tibial	ENSG00000240583.11	AQP1	chr7	30911694	30925516	+	7383	1.0554	1001.81	452.523	1.09633e-07	chr7_30752232_G_A_b38	-159462	chr7	30752232	G	A	1	rs4723010	347	416	0.356164	1	1.51756e-08	0.138502	0.0240799	9.999e-05	6.46823e-05	4.3941e-05	0.000158034	0.221635	0.157376	0.288345
Artery_Tibial	ENSG00000257743.8	MGAM2	chr7	142111749	142222324	+	6778	1.02484	884.029	465.963	1.01567e-10	chr7_141827647_T_TGCACA_b38	-284102	chr7	141827647	T	TGCACA	1	rs71522159	403	534	0.457192	1	1.12141e-11	-0.2926	0.0421089	9.999e-05	5.93626e-08	5.43078e-08	0.000166154	-0.686982	-0.877099	-0.538717
Artery_Tibial	ENSG00000254087.7	LYN	chr8	55879813	56014168	+	7973	1.03912	742.034	452.737	2.06351e-39	chr8_55880934_T_C_b38	1121	chr8	55880934	T	C	1	rs6474026	228	251	0.214897	1	1.62935e-44	0.490668	0.0317553	9.999e-05	5.98053e-38	2.63192e-37	0.000205092	0.520934	0.467104	0.568953
Artery_Tibial	ENSG00000165264.10	NDUFB6	chr9	32553011	32573184	-	8951	1.04029	851.156	452.109	2.55212e-16	chr9_32573149_C_G_b38	-35	chr9	32573149	C	G	1	rs631678	15	15	0.0128425	1	2.41152e-18	0.84123	0.0926933	9.999e-05	6.5926e-14	9.3988e-14	0.000179315	0.612172	0.477169	0.758674
Artery_Tibial	ENSG00000138115.13	CYP2C8	chr10	95036772	95069497	-	7085	1.04657	478.985	444.919	2.59721e-16	chr10_95237913_A_G_b38	168416	chr10	95237913	A	G	1	rs1049921	203	221	0.189212	1	1.31682e-18	-0.584023	0.0638163	9.999e-05	3.05477e-14	4.4409e-14	0.000323532	-0.989668	-1.18671	-0.675241
Artery_Tibial	ENSG00000174775.16	HRAS	chr11	532242	537287	-	6400	1.02742	846.494	454.732	2.82627e-40	chr11_534242_A_G_b38	-3045	chr11	534242	A	G	1	rs12628	313	374	0.320205	1	2.65712e-45	-0.282508	0.0180835	9.999e-05	2.34206e-38	1.0457e-37	0.000174646	-0.233801	-0.268401	-0.208633
Artery_Tibial	ENSG00000187486.5	KCNJ11	chr11	17385859	17389331	-	6662	1.03898	743.357	452.686	1.2237e-43	chr11_17386478_A_G_b38	-2853	chr11	17386478	A	G	1	rs2285676	367	453	0.387842	1	2.5722e-49	0.501543	0.0304267	9.999e-05	2.45836e-42	1.2521e-41	0.000204656	1.17879	1.04389	1.32993
Artery_Tibial	ENSG00000006071.12	ABCC8	chr11	17392885	17476845	-	6843	1.04931	789.843	454.631	3.53591e-43	chr11_17476510_G_A_b38	-335	chr11	17476510	G	A	1	rs77889556	174	189	0.161815	1	1.36349e-48	0.802305	0.0491328	9.999e-05	3.06462e-42	1.55274e-41	0.000197523	2.27362	2.04771	2.50136
Artery_Tibial	ENSG00000167792.11	NDUFV1	chr11	67606852	67612535	+	6269	1.07205	549.934	437.54	6.34321e-08	chr11_67607110_T_C_b38	258	chr11	67607110	T	C	1	rs1871043	376	477	0.40839	1	4.54796e-09	0.139742	0.0234258	9.999e-05	1.61271e-05	1.17312e-05	0.000299423	0.05988	0.04461	0.075144
Artery_Tibial	ENSG00000151366.12	NDUFC2	chr11	78068352	78080219	-	7061	1.02677	749.543	455.209	4.09048e-08	chr11_78100748_G_GT_b38	20529	chr11	78100748	G	GT	1	rs3841745	194	221	0.189212	1	5.5152e-09	-0.122293	0.0206173	9.999e-05	2.29486e-05	1.64046e-05	0.000196913	-0.078991	-0.11372	-0.050961
Artery_Tibial	ENSG00000069431.11	ABCC9	chr12	21797401	21942529	-	7905	1.03065	821.804	456.752	3.42904e-08	chr12_21884168_T_C_b38	-58361	chr12	21884168	T	C	1	rs1283808	381	489	0.418664	-1	4.80062e-09	0.144548	0.0242699	9.999e-05	2.01699e-05	1.45126e-05	0.000181349	0.215019	0.167134	0.269586
Artery_Tibial	ENSG00000070961.15	ATP2B1	chr12	89588049	89708831	-	5326	1.06723	564.819	448.357	2.34242e-16	chr12_89615182_A_G_b38	-93649	chr12	89615182	A	G	1	rs2681472	185	202	0.172945	1	1.58148e-18	0.349967	0.0383374	9.999e-05	1.74926e-14	2.58165e-14	0.000288259	0.225977	0.17974	0.271459
Artery_Tibial	ENSG00000184752.12	NDUFA12	chr12	94897055	95003770	-	8936	1.03834	1017.13	448.997	1.68685e-07	chr12_94993760_A_C_b38	-10010	chr12	94993760	A	C	1	rs9739952	392	491	0.420377	1	2.17906e-08	0.0950729	0.0167195	9.999e-05	0.000121011	7.97343e-05	0.000149341	0.067901	0.045561	0.088276
Artery_Tibial	ENSG00000076555.15	ACACB	chr12	109116595	109268226	+	6984	1.03966	819.976	451.055	3.36824e-08	chr12_109184435_C_G_b38	67840	chr12	109184435	C	G	1	rs10849921	98	100	0.0856164	-1	3.76523e-09	-0.228635	0.0381172	9.999e-05	1.79017e-05	1.2943e-05	0.000185845	-0.270348	-0.39244	-0.148031
Artery_Tibial	ENSG00000111725.10	PRKAB1	chr12	119667753	119681630	+	6702	1.02791	840.247	454.481	5.03285e-10	chr12_119671479_AGGCACCTCTTCACAGGAC_A_b38	3726	chr12	119671479	AGGCACCTCTTCACAGGAC	A	1	rs138621699	87	91	0.077911	1	3.76269e-11	0.306187	0.0452958	9.999e-05	2.77394e-07	2.39201e-07	0.00017616	0.180884	0.145763	0.220092
Artery_Tibial	ENSG00000172915.18	NBEA	chr13	34942287	35673022	+	7098	1.05695	849.013	456.075	5.95634e-13	chr13_34904903_T_C_b38	-37384	chr13	34904903	T	C	1	rs79575711	26	26	0.0222603	1	2.07966e-14	0.723124	0.0918576	9.999e-05	1.45734e-10	1.64722e-10	0.000187164	0.597338	0.462967	0.728126
Artery_Tibial	ENSG00000137806.8	NDUFAF1	chr15	41387349	41402519	-	6332	1.04008	503.227	440.351	4.88976e-12	chr15_41491616_A_G_b38	89097	chr15	41491616	A	G	1	rs1757463	307	363	0.310788	1	8.34502e-14	-0.222241	0.0289542	9.999e-05	1.0926e-09	1.15393e-09	0.000303113	-0.136254	-0.16812	-0.101223
Artery_Tibial	ENSG00000169032.9	MAP2K1	chr15	66386817	66492312	+	6979	1.03623	922.998	459.952	7.77366e-10	chr15_66351925_T_TA_b38	-34892	chr15	66351925	T	TA	1	rs62627278	219	255	0.218322	1	7.97227e-11	-0.188482	0.0283841	9.999e-05	4.23062e-07	3.59545e-07	0.000163716	-0.143935	-0.175792	-0.104389
Artery_Tibial	ENSG00000140675.12	SLC5A2	chr16	31483002	31489338	+	3566	1.0501	365.47	446.676	3.72469e-12	chr16_31484350_G_C_b38	1348	chr16	31484350	G	C	1	rs11646054	380	484	0.414384	1	9.12533e-14	-0.368385	0.0480742	9.999e-05	4.78927e-10	5.21405e-10	0.000427632	-0.706626	-0.914757	-0.522177
Artery_Tibial	ENSG00000167720.12	SRR	chr17	2303383	2325260	+	8461	1.03264	1559.53	465.674	5.24475e-78	chr17_2304032_G_A_b38	649	chr17	2304032	G	A	1	rs3744270	300	352	0.30137	1	6.50045e-86	-0.783476	0.0326531	9.999e-05	3.0808e-77	4.93154e-76	9.60415e-05	-0.827353	-0.893879	-0.746472
Artery_Tibial	ENSG00000142494.13	SLC47A1	chr17	19495385	19579034	+	4687	1.03199	523.896	458.722	5.00731e-25	chr17_19529080_C_T_b38	33695	chr17	19529080	C	T	1	rs11871125	358	440	0.376712	1	7.56032e-28	-0.404522	0.0348335	9.999e-05	5.27674e-23	1.23626e-22	0.000285402	-0.778725	-0.890036	-0.638302
Artery_Tibial	ENSG00000171298.12	GAA	chr17	80101556	80119879	+	9997	1.02432	1871.9	467.005	1.02238e-56	chr17_80102793_A_C_b38	1237	chr17	80102793	A	C	1	rs12450199	338	423	0.362158	1	3.01827e-62	-0.485215	0.025297	9.999e-05	9.89494e-55	7.59612e-54	7.83697e-05	-0.514857	-0.563494	-0.453048
Artery_Tibial	ENSG00000174886.12	NDUFA11	chr19	5891276	5904006	-	8886	1.04661	1542.51	459.802	2.87104e-16	chr19_5911957_C_G_b38	7951	chr19	5911957	C	G	1	rs274789	417	544	0.465753	-1	5.2543e-18	0.130797	0.0145709	9.999e-05	1.15234e-13	1.6179e-13	0.000100489	0.115944	0.09534	0.139011
Artery_Tibial	ENSG00000171051.8	FPR1	chr19	51745172	51804110	-	10609	1.0453	1781.5	462.788	8.29335e-15	chr19_51751943_A_G_b38	-52167	chr19	51751943	A	G	1	rs4802859	324	383	0.327911	-1	2.79848e-16	0.243148	0.0287416	9.999e-05	4.68008e-12	5.8808e-12	8.67322e-05	0.562003	0.404963	0.762593
Artery_Tibial	ENSG00000170906.15	NDUFA3	chr19	54102728	54109257	+	12746	1.02673	2482.58	466.038	2.31505e-42	chr19_54108427_A_G_b38	5699	chr19	54108427	A	G	1	rs75622830	123	130	0.111301	1	1.51858e-46	0.427816	0.0269224	9.999e-05	5.40086e-40	2.53374e-39	5.9451e-05	0.352169	0.308726	0.392417
Artery_Tibial	ENSG00000105618.13	PRPF31	chr19	54115676	54131719	+	12708	1.04127	2556.86	466.202	2.2802e-09	chr19_54109096_C_T_b38	-6580	chr19	54109096	C	T	1	rs11667012	134	142	0.121575	1	3.48096e-10	0.247848	0.0387199	9.999e-05	3.48196e-06	2.71741e-06	5.98404e-05	0.110231	0.08144	0.137688
Artery_Tibial	ENSG00000160194.17	NDUFV3	chr21	42879644	42913304	+	8344	1.03597	1280.13	458.283	1.44148e-66	chr21_42903610_C_T_b38	23966	chr21	42903610	C	T	1	rs4148974	51	52	0.0445205	1	1.92115e-74	-1.2497	0.0576769	9.999e-05	1.00623e-65	1.09588e-64	0.00011797	-0.913836	-1.00972	-0.776247
Artery_Tibial	ENSG00000100191.5	SLC5A4	chr22	32218476	32255341	-	8455	1.04086	820.277	449.838	1.67205e-12	chr22_32371551_A_G_b38	116210	chr22	32371551	A	G	1	rs5754035	74	75	0.0642123	1	4.46721e-14	0.572705	0.0737592	9.999e-05	5.85232e-10	6.32996e-10	0.000186324	1.33419	1.0467	1.54836
Artery_Tibial	ENSG00000184983.9	NDUFA6	chr22	42085525	42090930	-	7183	1.04737	560.959	440.251	1.1582e-84	chr22_42090076_G_A_b38	-854	chr22	42090076	G	A	1	rs1989202	43	44	0.0376712	1	1.54051e-98	1.4022	0.0527726	9.999e-05	9.08173e-86	1.91033e-84	0.000276799	0.987877	0.931228	1.02451
Artery_Tibial	ENSG00000100197.20	CYP2D6	chr22	42126499	42130906	-	7271	1.06734	581.229	437.678	1.2776e-39	chr22_42138673_C_T_b38	7767	chr22	42138673	C	T	1	rs2743451	411	542	0.464041	-1	3.12676e-46	0.630093	0.039821	9.999e-05	2.65967e-39	1.22603e-38	0.000280195	1.06448	0.928613	1.18091
Artery_Tibial	ENSG00000186951.16	PPARA	chr22	46150521	46243756	+	9539	1.05693	1604.82	461.358	9.78266e-11	chr22_46242231_C_G_b38	91710	chr22	46242231	C	G	1	rs45550937	112	119	0.101884	1	8.50222e-12	-0.168161	0.0240529	9.999e-05	6.27532e-08	5.72927e-08	9.90185e-05	-0.177454	-0.213492	-0.13798
Artery_Tibial	ENSG00000147123.10	NDUFB11	chrX	47142216	47144868	-	3948	1.03434	529.879	463.278	2.25789e-13	chrX_47206931_C_T_b38	62063	chrX	47206931	C	T	1	rs4529579	281	489	0.418664	-1	1.12775e-14	0.107135	0.0134632	9.999e-05	5.37945e-11	6.28142e-11	0.000283828	0.076263	0.058483	0.090061
Artery_Tibial	ENSG00000125356.6	NDUFA1	chrX	119871828	119876662	+	4918	1.03926	715.672	455.359	1.41275e-12	chrX_119822074_A_G_b38	-49754	chrX	119822074	A	G	1	rs2428996	337	577	0.494007	-1	5.25138e-14	-0.078145	0.0100942	9.999e-05	4.40768e-10	4.81028e-10	0.000212718	-0.067922	-0.079216	-0.053362
Artery_Tibial	ENSG00000101966.12	XIAP	chrX	123859724	123913979	+	4159	1.03459	726.933	459.764	2.85287e-08	chrX_123885267_A_G_b38	25543	chrX	123885267	A	G	1	rs2355676	256	424	0.363014	1	4.3893e-09	-0.111764	0.0187162	9.999e-05	1.40699e-05	1.02965e-05	0.000207027	-0.060316	-0.084712	-0.044925
Brain_Amygdala	ENSG00000023228.13	NDUFS1	chr2	206114817	206159584	-	6870	1.03268	824.035	94.7883	6.21651e-08	chr2_206134960_T_G_b38	-24624	chr2	206134960	T	G	1	rs10166505	95	127	0.492248	1	1.42258e-08	-0.312806	0.0508189	9.999e-05	3.65688e-05	0.000299417	2.18181e-05	-0.188111	-0.244056	-0.139712
Brain_Amygdala	ENSG00000130414.11	NDUFA10	chr2	239892450	240025402	-	10077	1.04432	1329.49	94.6055	8.81059e-09	chr2_239958809_C_T_b38	-66593	chr2	239958809	C	T	1	rs1132778	30	31	0.120155	1	1.61534e-09	-0.534208	0.080709	9.999e-05	6.94615e-06	6.66683e-05	1.42205e-05	-0.313055	-0.415474	-0.187138
Brain_Amygdala	ENSG00000114770.16	ABCC5	chr3	183919934	184018015	-	7604	1.05843	857.788	94.0367	1.43773e-07	chr3_183917700_C_T_b38	-100315	chr3	183917700	C	T	1	rs1533683	91	126	0.488372	1	3.14099e-08	0.281932	0.0471226	9.999e-05	7.10274e-05	0.000538227	2.33934e-05	0.183881	0.126364	0.244381
Brain_Amygdala	ENSG00000137806.8	NDUFAF1	chr15	41387349	41402519	-	6332	1.06215	461.927	92.7672	5.37835e-08	chr15_41377988_T_C_b38	-24531	chr15	41377988	T	C	1	rs7168002	50	58	0.245763	1	8.42115e-09	-0.44382	0.070804	9.999e-05	1.25053e-05	0.00011383	4.41164e-05	-0.284489	-0.342087	-0.231539
Brain_Amygdala	ENSG00000167720.12	SRR	chr17	2303383	2325260	+	8461	1.02178	1388.35	97.5	1.00463e-10	chr17_2304131_C_T_b38	748	chr17	2304131	C	T	1	rs12450028	75	89	0.344961	1	2.40006e-11	-0.485804	0.0649008	9.999e-05	9.79804e-08	1.40726e-06	1.23428e-05	-0.392272	-0.51903	-0.298569
Brain_Amygdala	ENSG00000184983.9	NDUFA6	chr22	42085525	42090930	-	7183	1.0431	444.013	90.9898	3.81148e-08	chr22_42084417_G_A_b38	-6513	chr22	42084417	G	A	1	rs139043947	13	13	0.0503876	1	4.06891e-09	0.789392	0.122888	9.999e-05	1.03444e-05	9.61555e-05	4.23562e-05	0.576939	0.499519	0.661371
Brain_Amygdala	ENSG00000100197.20	CYP2D6	chr22	42126499	42130906	-	7271	1.03513	478.368	91.9953	7.93341e-14	chr22_42115818_G_C_b38	-15088	chr22	42115818	G	C	1	rs2413670	93	119	0.464844	-1	1.92129e-15	0.640626	0.0685283	9.999e-05	1.60877e-11	4.48281e-10	3.79859e-05	1.19944	1.00568	1.37129
Brain_Anterior_cingulate_cortex_BA24	ENSG00000134184.12	GSTM1	chr1	109687814	109693745	+	6623	1.04114	895.718	112.29	9.03822e-08	chr1_109724132_A_C_b38	36318	chr1	109724132	A	C	1	rs11101992	73	91	0.309524	1	2.51333e-08	0.732891	0.122969	0.00019998	5.39651e-05	0.000264684	3.49342e-05	3.28649	1.54234	4.32497
Brain_Anterior_cingulate_cortex_BA24	ENSG00000094963.13	FMO2	chr1	171185208	171211230	+	7658	1.03049	558.169	110.551	1.45906e-08	chr1_171151817_C_G_b38	-33391	chr1	171151817	C	G	1	rs7882954	61	70	0.271318	1	2.62089e-09	-0.669457	0.104141	9.999e-05	5.62273e-06	3.45306e-05	5.3802e-05	-1.35797	-1.66961	-0.947711
Brain_Anterior_cingulate_cortex_BA24	ENSG00000023228.13	NDUFS1	chr2	206114817	206159584	-	6870	1.03633	875.13	112.147	2.9998e-08	chr2_206128713_T_A_b38	-30871	chr2	206128713	T	A	1	rs7558619	103	136	0.482269	-1	7.43599e-09	-0.289988	0.046664	9.999e-05	1.76163e-05	9.61594e-05	3.51017e-05	-0.186864	-0.216248	-0.135354
Brain_Anterior_cingulate_cortex_BA24	ENSG00000123545.5	NDUFAF4	chr6	96889313	96897881	-	7110	1.05191	495.696	110.05	3.31638e-08	chr6_96887862_A_ATAGAG_b38	-10019	chr6	96887862	A	ATAGAG	1	rs146178235	38	39	0.145522	-1	5.98067e-09	-0.294831	0.0471024	9.999e-05	9.07061e-06	5.29817e-05	6.57522e-05	-0.361719	-0.448747	-0.29868
Brain_Anterior_cingulate_cortex_BA24	ENSG00000257335.8	MGAM	chr7	141907813	142106747	+	6643	1.03582	740.18	112.957	1.91248e-08	chr7_141765563_T_C_b38	-142250	chr7	141765563	T	C	1	rs6962760	113	144	0.489796	1	5.17995e-09	-0.524311	0.0833703	9.999e-05	9.34292e-06	5.43655e-05	4.14196e-05	-1.15099	-1.44289	-0.726679
Brain_Anterior_cingulate_cortex_BA24	ENSG00000006071.12	ABCC8	chr11	17392885	17476845	-	6843	1.0513	736.472	111.933	1.05203e-12	chr11_17476247_C_G_b38	-598	chr11	17476247	C	G	1	rs985136	104	139	0.472789	1	1.01993e-13	0.383049	0.0456687	9.999e-05	2.58231e-10	3.18081e-09	4.41557e-05	0.437944	0.36864	0.552207
Brain_Anterior_cingulate_cortex_BA24	ENSG00000137806.8	NDUFAF1	chr15	41387349	41402519	-	6332	1.03547	468.89	109.514	6.17587e-20	chr15_41468592_C_G_b38	66073	chr15	41468592	C	G	1	rs111421683	59	72	0.244898	1	4.89835e-22	-0.711754	0.0600436	9.999e-05	7.38813e-18	2.58785e-16	6.52941e-05	-0.407289	-0.496513	-0.331488
Brain_Anterior_cingulate_cortex_BA24	ENSG00000167720.12	SRR	chr17	2303383	2325260	+	8461	1.04451	1325.67	112.695	1.80211e-15	chr17_2304131_C_T_b38	748	chr17	2304131	C	T	1	rs12450028	88	101	0.343537	1	1.25833e-16	-0.588593	0.0612332	9.999e-05	7.11927e-13	1.29317e-11	2.39096e-05	-0.436215	-0.490669	-0.375181
Brain_Anterior_cingulate_cortex_BA24	ENSG00000171298.12	GAA	chr17	80101556	80119879	+	9997	1.00386	1826.08	115.006	5.50129e-11	chr17_80105425_G_A_b38	3869	chr17	80105425	G	A	1	rs34746710	75	85	0.289116	1	1.43897e-11	-0.588054	0.0788803	9.999e-05	9.42511e-08	7.82636e-07	1.47891e-05	-0.343082	-0.40568	-0.284804
Brain_Anterior_cingulate_cortex_BA24	ENSG00000100197.20	CYP2D6	chr22	42126499	42130906	-	7271	1.07543	458.599	105.88	8.07307e-17	chr22_42138673_C_T_b38	7767	chr22	42138673	C	T	1	rs2743451	113	143	0.486395	-1	3.73786e-19	0.713427	0.0669225	9.999e-05	3.47352e-15	8.46982e-14	7.7496e-05	1.19973	0.9836	1.44746
Brain_Caudate_basal_ganglia	ENSG00000168653.10	NDUFS5	chr1	39026318	39034636	+	6847	1.02715	952.713	141.713	2.6625e-12	chr1_39054880_G_A_b38	28562	chr1	39054880	G	A	1	rs12034567	94	109	0.280928	1	3.045e-13	-0.267426	0.033493	9.999e-05	1.46486e-09	8.08742e-09	5.16108e-05	-0.236645	-0.265493	-0.201785
Brain_Caudate_basal_ganglia	ENSG00000243480.7	AMY2A	chr1	103616811	103625780	+	8055	1.04185	441.144	135.096	2.04726e-07	chr1_103760665_C_T_b38	143854	chr1	103760665	C	T	1	rs138923510	11	11	0.0283505	1	2.89275e-08	-1.15799	0.198042	9.999e-05	6.00597e-05	0.000160562	0.000117189	-6.64386	-6.64386	-6.64386
Brain_Caudate_basal_ganglia	ENSG00000134184.12	GSTM1	chr1	109687814	109693745	+	6623	1.04805	921.092	139.187	2.97685e-09	chr1_109675302_G_A_b38	-12512	chr1	109675302	G	A	1	rs611951	54	56	0.14433	-1	4.32954e-10	-0.954381	0.143085	9.999e-05	1.45095e-06	5.13509e-06	5.7308e-05	-5.64201	-6.54943	-4.43754
Brain_Caudate_basal_ganglia	ENSG00000094963.13	FMO2	chr1	171185208	171211230	+	7658	1.04856	592.418	137.066	1.56061e-08	chr1_171219393_T_A_b38	34185	chr1	171219393	T	A	1	rs12124505	72	81	0.208763	1	2.0338e-09	-0.588019	0.0922549	9.999e-05	5.15535e-06	1.67528e-05	8.92515e-05	-1.02622	-1.21337	-0.813612
Brain_Caudate_basal_ganglia	ENSG00000023228.13	NDUFS1	chr2	206114817	206159584	-	6870	1.02784	871.869	138.585	1.97973e-14	chr2_206128713_T_A_b38	-30871	chr2	206128713	T	A	1	rs7558619	131	180	0.481283	1	7.16389e-16	-0.290915	0.0322612	9.999e-05	8.55446e-12	6.30444e-11	5.65308e-05	-0.152776	-0.176016	-0.12222
Brain_Caudate_basal_ganglia	ENSG00000130414.11	NDUFA10	chr2	239892450	240025402	-	10077	1.035	1544.56	140.961	3.35793e-11	chr2_239992909_G_A_b38	-32493	chr2	239992909	G	A	1	rs1465880	93	114	0.293814	1	4.18407e-12	0.343276	0.0456366	9.999e-05	2.84012e-08	1.3135e-07	3.27045e-05	0.169884	0.138022	0.201198
Brain_Caudate_basal_ganglia	ENSG00000114770.16	ABCC5	chr3	183919934	184018015	-	7604	1.04728	983.735	138.374	2.05237e-09	chr3_184037743_A_C_b38	19728	chr3	184037743	A	C	1	rs1467257	129	157	0.404639	-1	2.54715e-10	0.217355	0.0321056	9.999e-05	1.06393e-06	3.85225e-06	5.35212e-05	0.154081	0.094542	0.199264
Brain_Caudate_basal_ganglia	ENSG00000170606.14	HSPA4	chr5	133051962	133106449	+	6836	1.05779	858.802	138.404	2.34163e-07	chr5_133071366_C_T_b38	19404	chr5	133071366	C	T	1	rs6596100	74	83	0.213918	1	4.91303e-08	0.322051	0.0561177	9.999e-05	0.000119862	0.000302127	6.34776e-05	0.158488	0.098951	0.203494
Brain_Caudate_basal_ganglia	ENSG00000204371.11	EHMT2	chr6	31879759	31897684	-	26877	1.0648	557.529	123.937	2.15984e-08	chr6_31968891_T_C_b38	71207	chr6	31968891	T	C	1	rs410851	89	107	0.275773	-1	4.28466e-10	0.279049	0.041824	9.999e-05	5.61628e-06	1.81032e-05	0.000100038	0.161221	0.125438	0.207009
Brain_Caudate_basal_ganglia	ENSG00000123545.5	NDUFAF4	chr6	96889313	96897881	-	7110	1.0427	543.001	138.585	5.91701e-14	chr6_96786110_A_ATAT_b38	-111771	chr6	96786110	A	ATAT	1	rs542802210	46	49	0.126289	1	2.41467e-15	0.337066	0.0382451	9.999e-05	1.12408e-11	8.15242e-11	9.5481e-05	0.361307	0.289519	0.431348
Brain_Caudate_basal_ganglia	ENSG00000146477.5	SLC22A3	chr6	160348268	160452581	+	8277	1.04821	822.737	137.352	1.18013e-10	chr6_160370338_C_G_b38	22070	chr6	160370338	C	G	1	rs3127574	144	193	0.497423	-1	8.95212e-12	0.437738	0.0592704	9.999e-05	4.3643e-08	1.95787e-07	6.41928e-05	0.574722	0.474708	0.676574
Brain_Caudate_basal_ganglia	ENSG00000257335.8	MGAM	chr7	141907813	142106747	+	6643	1.02656	770.481	140.54	1.66065e-16	chr7_141801947_C_G_b38	-105866	chr7	141801947	C	G	1	rs12703408	137	181	0.466495	1	6.06044e-18	-0.647308	0.0659991	9.999e-05	5.74896e-14	5.47085e-13	6.3687e-05	-1.37423	-1.54014	-1.15381
Brain_Caudate_basal_ganglia	ENSG00000138207.13	RBP4	chr10	93591687	93601744	-	7289	1.04623	798.795	139.848	8.73324e-11	chr10_93703255_G_C_b38	101511	chr10	93703255	G	C	1	rs11592142	138	187	0.481959	1	9.84029e-12	0.220453	0.0299188	9.999e-05	3.1916e-08	1.46754e-07	6.56809e-05	0.452398	0.361625	0.552559
Brain_Caudate_basal_ganglia	ENSG00000174775.16	HRAS	chr11	532242	537287	-	6400	1.06437	851.184	137.743	3.95471e-11	chr11_521462_C_T_b38	-15825	chr11	521462	C	T	1	rs61877775	36	40	0.103093	1	2.82787e-12	-0.335764	0.0442269	9.999e-05	1.08086e-08	5.282e-08	6.54363e-05	-0.302742	-0.395828	-0.249645
Brain_Caudate_basal_ganglia	ENSG00000187486.5	KCNJ11	chr11	17385859	17389331	-	6662	1.0594	682.501	137.457	8.70177e-18	chr11_17424198_C_A_b38	34867	chr11	17424198	C	A	1	rs2237987	58	64	0.164948	1	9.55918e-20	0.504426	0.0481141	9.999e-05	8.26624e-16	9.65067e-15	8.02962e-05	0.632021	0.539494	0.740048
Brain_Caudate_basal_ganglia	ENSG00000006071.12	ABCC8	chr11	17392885	17476845	-	6843	1.05478	804.82	140.856	1.32155e-14	chr11_17476247_C_G_b38	-598	chr11	17476247	C	G	1	rs985136	140	188	0.484536	1	7.86198e-16	0.4629	0.0514224	9.999e-05	2.60157e-12	2.04648e-11	6.70674e-05	0.470007	0.387389	0.544957
Brain_Caudate_basal_ganglia	ENSG00000110717.12	NDUFS8	chr11	68030627	68036644	+	7034	1.05146	595.027	135.938	7.17689e-12	chr11_68031799_G_A_b38	1172	chr11	68031799	G	A	1	rs999571	49	52	0.134021	1	2.94767e-13	-0.348708	0.0436419	9.999e-05	1.54864e-09	8.5352e-09	8.97211e-05	-0.30246	-0.370921	-0.234036
Brain_Caudate_basal_ganglia	ENSG00000069431.11	ABCC9	chr12	21797401	21942529	-	7905	1.04861	723.751	137.322	1.2825e-08	chr12_21884045_T_C_b38	-58484	chr12	21884045	T	C	1	rs1388698	127	169	0.435567	1	1.69018e-09	0.313445	0.048902	9.999e-05	5.1738e-06	1.68071e-05	7.30691e-05	0.50041	0.356945	0.604564
Brain_Caudate_basal_ganglia	ENSG00000137806.8	NDUFAF1	chr15	41387349	41402519	-	6332	1.06928	445.054	132.058	3.40706e-14	chr15_41425115_A_T_b38	22596	chr15	41425115	A	T	1	rs28459164	71	79	0.203608	1	2.61998e-16	-0.506918	0.0551868	9.999e-05	2.61763e-12	2.05574e-11	0.000127144	-0.256511	-0.311359	-0.22978
Brain_Caudate_basal_ganglia	ENSG00000167720.12	SRR	chr17	2303383	2325260	+	8461	1.02539	1496.29	142.661	7.91227e-19	chr17_2304131_C_T_b38	748	chr17	2304131	C	T	1	rs12450028	110	127	0.32732	1	3.32815e-20	-0.578029	0.054251	9.999e-05	4.8928e-16	5.86972e-15	3.26624e-05	-0.475095	-0.585919	-0.409788
Brain_Caudate_basal_ganglia	ENSG00000142494.13	SLC47A1	chr17	19495385	19579034	+	4687	1.02528	508.419	141.066	9.10268e-08	chr17_19522338_TAGAG_T_b38	26953	chr17	19522338	TAGAG	T	1	rs34715612	139	175	0.451031	1	2.3478e-08	-0.499759	0.0848551	9.999e-05	3.55698e-05	9.88739e-05	9.60849e-05	-0.475902	-0.597665	-0.354614
Brain_Caudate_basal_ganglia	ENSG00000171298.12	GAA	chr17	80101556	80119879	+	9997	1.05352	1763.41	140.435	5.39198e-14	chr17_80101663_G_C_b38	107	chr17	80101663	G	C	1	rs2304849	77	85	0.219072	1	3.32197e-15	-0.528722	0.0603599	9.999e-05	2.70107e-11	1.87243e-10	3.04836e-05	-0.300794	-0.353195	-0.236601
Brain_Caudate_basal_ganglia	ENSG00000171051.8	FPR1	chr19	51745172	51804110	-	10609	1.01775	1674.56	141.879	1.2247e-08	chr19_51751943_A_G_b38	-52167	chr19	51751943	A	G	1	rs4802859	106	124	0.319588	-1	2.93122e-09	0.286132	0.0453976	9.999e-05	1.68031e-05	4.94655e-05	2.84176e-05	0.926775	0.656885	1.4056
Brain_Caudate_basal_ganglia	ENSG00000170906.15	NDUFA3	chr19	54102728	54109257	+	12746	1.03186	2462.41	142.495	3.71795e-13	chr19_54108427_A_G_b38	5699	chr19	54108427	A	G	1	rs75622830	44	49	0.126289	1	4.22027e-14	0.425449	0.0510952	9.999e-05	4.65289e-10	2.74622e-09	2.02952e-05	0.301875	0.226028	0.365529
Brain_Caudate_basal_ganglia	ENSG00000160194.17	NDUFV3	chr21	42879644	42913304	+	8344	1.0396	1295.81	141.307	5.21558e-13	chr21_42877113_A_G_b38	-2531	chr21	42877113	A	G	1	rs6586258	120	158	0.478788	-1	4.77585e-14	0.479131	0.0576895	9.999e-05	2.87871e-10	1.75534e-09	3.95963e-05	0.222169	0.180444	0.297219
Brain_Caudate_basal_ganglia	ENSG00000100191.5	SLC5A4	chr22	32218476	32255341	-	8455	1.05341	736.188	135.337	1.19104e-09	chr22_32355072_C_CCGCCCCCG_b38	99731	chr22	32355072	C	CCGCCCCCG	2	rs1276807958	23	23	0.0598958	1	8.66064e-11	1.0676	0.153146	9.999e-05	4.06658e-07	1.56852e-06	7.29884e-05	1.57767	1.29556	1.79852
Brain_Caudate_basal_ganglia	ENSG00000184983.9	NDUFA6	chr22	42085525	42090930	-	7183	1.02249	503.119	135.863	4.79389e-19	chr22_42090076_G_A_b38	-854	chr22	42090076	G	A	1	rs1989202	22	22	0.056701	1	2.19295e-21	0.832743	0.0750672	9.999e-05	1.06404e-16	1.35638e-15	9.61604e-05	0.500513	0.442086	0.560128
Brain_Caudate_basal_ganglia	ENSG00000100197.20	CYP2D6	chr22	42126499	42130906	-	7271	1.07114	459.293	130.193	3.21475e-32	chr22_42085396_G_C_b38	-45510	chr22	42085396	G	C	1	rs5758574	145	182	0.469072	-1	8.08209e-38	0.774045	0.0448571	9.999e-05	1.27174e-31	6.95702e-30	0.000123942	1.51517	1.3546	1.6987
Brain_Caudate_basal_ganglia	ENSG00000147123.10	NDUFB11	chrX	47142216	47144868	-	3948	1.04251	483.55	143.683	5.97352e-08	chrX_47241799_T_C_b38	96931	chrX	47241799	T	C	1	rs17327529	41	66	0.170103	1	2.00659e-08	-0.208187	0.0351589	9.999e-05	1.81832e-05	5.32173e-05	0.00010715	-0.145063	-0.175823	-0.114349
Brain_Cerebellar_Hemisphere	ENSG00000168653.10	NDUFS5	chr1	39026318	39034636	+	6847	1.03075	833.815	121.632	3.01452e-16	chr1_39017244_CTGTA_C_b38	-9074	chr1	39017244	CTGTA	C	1	rs146087529	88	101	0.288571	1	7.1903e-18	-0.402568	0.0403995	9.999e-05	1.0165e-13	6.68985e-13	7.40708e-05	-0.358954	-0.415846	-0.311528
Brain_Cerebellar_Hemisphere	ENSG00000085832.16	EPS15	chr1	51354263	51519328	-	4443	1.03525	258.293	121.83	6.00327e-09	chr1_51370670_G_A_b38	-148658	chr1	51370670	G	A	1	rs148648502	22	23	0.0657143	1	9.11387e-10	0.634367	0.0962785	9.999e-05	9.52958e-07	2.56612e-06	0.000242583	0.339436	0.227103	0.441712
Brain_Cerebellar_Hemisphere	ENSG00000243480.7	AMY2A	chr1	103616811	103625780	+	8055	1.0634	392.56	115.923	2.48732e-07	chr1_103489757_T_C_b38	-127054	chr1	103489757	T	C	1	rs78200622	29	31	0.0885714	1	2.56765e-08	1.01819	0.172101	9.999e-05	5.28684e-05	0.000108322	0.00017439	2.44767	2.02739	2.84517
Brain_Cerebellar_Hemisphere	ENSG00000134184.12	GSTM1	chr1	109687814	109693745	+	6623	1.04107	916.552	123.227	1.20062e-08	chr1_109675302_G_A_b38	-12512	chr1	109675302	G	A	1	rs611951	48	50	0.142857	-1	2.42058e-09	-0.880197	0.137622	9.999e-05	6.7631e-06	1.60062e-05	6.96575e-05	-4.44503	-5.18068	-3.58099
Brain_Cerebellar_Hemisphere	ENSG00000131791.7	PRKAB2	chr1	147155106	147172550	-	6380	1.04892	659.744	122.331	6.73528e-11	chr1_147157163_T_G_b38	-15387	chr1	147157163	T	G	1	rs1837984	125	164	0.468571	1	7.01492e-12	-0.271221	0.036085	9.999e-05	1.89996e-08	6.57718e-08	9.92049e-05	-0.193975	-0.232241	-0.159644
Brain_Cerebellar_Hemisphere	ENSG00000198929.12	NOS1AP	chr1	162069774	162370475	+	7637	1.04998	898.788	122.001	2.48422e-17	chr1_162284036_T_C_b38	214262	chr1	162284036	T	C	1	rs12030361	68	77	0.22	1	5.10409e-19	0.79263	0.0760702	9.999e-05	4.53964e-15	3.54831e-14	7.30648e-05	0.506497	0.44068	0.575677
Brain_Cerebellar_Hemisphere	ENSG00000094963.13	FMO2	chr1	171185208	171211230	+	7658	1.03961	559.985	119.417	1.1294e-08	chr1_171166625_A_G_b38	-18583	chr1	171166625	A	G	1	rs10912475	121	163	0.465714	1	1.25834e-09	-0.513897	0.0787533	9.999e-05	3.86901e-06	9.53249e-06	0.000113478	-1.09356	-1.40949	-0.877394
Brain_Cerebellar_Hemisphere	ENSG00000023228.13	NDUFS1	chr2	206114817	206159584	-	6870	1.04515	833.418	121.5	6.30081e-11	chr2_206088333_A_G_b38	-71251	chr2	206088333	A	G	1	rs12694039	124	167	0.477143	1	5.52579e-12	-0.252334	0.0333758	9.999e-05	2.41574e-08	8.2214e-08	7.76046e-05	-0.167858	-0.197555	-0.140868
Brain_Cerebellar_Hemisphere	ENSG00000130414.11	NDUFA10	chr2	239892450	240025402	-	10077	1.0181	1615.08	125.31	2.34486e-09	chr2_239948115_GGCA_G_b38	-77287	chr2	239948115	GGCA	G	1	rs79882483	80	96	0.274286	1	5.66864e-10	0.355805	0.05325	9.999e-05	2.99782e-06	7.50808e-06	3.66884e-05	0.145898	0.117599	0.178422
Brain_Cerebellar_Hemisphere	ENSG00000157017.15	GHRL	chr3	10285747	10291451	-	7468	1.03657	1059.11	121.764	1.01215e-09	chr3_10300578_C_T_b38	9127	chr3	10300578	C	T	1	rs149162	103	122	0.348571	-1	1.25821e-10	0.589799	0.0845894	9.999e-05	6.38192e-07	1.77158e-06	5.94205e-05	0.889989	0.636168	1.14665
Brain_Cerebellar_Hemisphere	ENSG00000132170.19	PPARG	chr3	12287368	12434356	+	7876	1.03589	879.074	120.775	2.52234e-26	chr3_12304472_C_A_b38	17104	chr3	12304472	C	A	1	rs17793693	32	32	0.0914286	1	3.05319e-29	1.77606	0.122725	9.999e-05	3.35775e-24	7.07244e-23	7.1433e-05	1.75296	1.58705	1.88885
Brain_Cerebellar_Hemisphere	ENSG00000114770.16	ABCC5	chr3	183919934	184018015	-	7604	1.04086	964.714	122.186	2.60529e-11	chr3_183922361_GA_G_b38	-95654	chr3	183922361	GA	G	1	rs60053269	122	156	0.445714	1	2.39102e-12	0.373702	0.0484387	9.999e-05	1.2079e-08	4.27769e-08	6.61359e-05	0.204682	0.165891	0.242647
Brain_Cerebellar_Hemisphere	ENSG00000170606.14	HSPA4	chr5	133051962	133106449	+	6836	1.04933	813.921	120.683	2.23151e-07	chr5_133053995_C_G_b38	2033	chr5	133053995	C	G	1	rs12173082	61	68	0.194286	1	4.28419e-08	0.300139	0.0516626	0.00019998	0.000116201	0.000224503	8.05181e-05	0.26176	0.199639	0.384745
Brain_Cerebellar_Hemisphere	ENSG00000123545.5	NDUFAF4	chr6	96889313	96897881	-	7110	1.02703	497.165	120.379	4.69018e-15	chr6_96887862_A_ATAGAG_b38	-10019	chr6	96887862	A	ATAGAG	1	rs146178235	42	46	0.141975	-1	1.05077e-16	-0.448816	0.0472416	9.999e-05	1.11746e-12	6.54388e-12	0.000122729	-0.333416	-0.381488	-0.299513
Brain_Cerebellar_Hemisphere	ENSG00000257335.8	MGAM	chr7	141907813	142106747	+	6643	1.03764	706.48	122.093	1.01405e-08	chr7_141735636_T_C_b38	-172177	chr7	141735636	T	C	1	rs12533304	130	174	0.497143	-1	1.69435e-09	-0.534827	0.082706	9.999e-05	4.5126e-06	1.10038e-05	8.93835e-05	-1.21829	-1.56794	-0.835564
Brain_Cerebellar_Hemisphere	ENSG00000254087.7	LYN	chr8	55879813	56014168	+	7973	1.02266	796.939	125.719	9.91216e-08	chr8_55861241_A_G_b38	-18572	chr8	55861241	A	G	1	rs28610902	48	51	0.145714	1	3.34688e-08	-0.560315	0.0955977	0.00019998	6.31509e-05	0.000127916	7.54782e-05	-0.287086	-0.366123	-0.22498
Brain_Cerebellar_Hemisphere	ENSG00000174775.16	HRAS	chr11	532242	537287	-	6400	1.04707	803.229	120.722	5.41059e-09	chr11_524397_T_C_b38	-12890	chr11	524397	T	C	1	rs4963184	88	114	0.325714	1	6.79877e-10	-0.178899	0.0269172	9.999e-05	2.38094e-06	6.05494e-06	8.10111e-05	-0.116963	-0.141753	-0.086234
Brain_Cerebellar_Hemisphere	ENSG00000006071.12	ABCC8	chr11	17392885	17476845	-	6843	1.00907	750.277	123.464	7.36805e-13	chr11_17400243_G_A_b38	-76602	chr11	17400243	G	A	1	rs2074312	81	97	0.277143	1	6.32038e-14	0.448426	0.0535529	9.999e-05	4.53849e-10	1.93748e-09	7.66301e-05	0.298729	0.245504	0.339512
Brain_Cerebellar_Hemisphere	ENSG00000213619.9	NDUFS3	chr11	47579016	47584562	+	5380	1.03649	198.869	116.227	3.7794e-08	chr11_47505500_G_T_b38	-73516	chr11	47505500	G	T	1	rs10838724	99	120	0.342857	1	3.025e-09	0.199817	0.0314608	9.999e-05	4.81035e-06	1.16622e-05	0.000316308	0.134641	0.097485	0.167812
Brain_Cerebellar_Hemisphere	ENSG00000167792.11	NDUFV1	chr11	67606852	67612535	+	6269	1.06554	483.84	117.584	3.91824e-09	chr11_67607110_T_C_b38	258	chr11	67607110	T	C	1	rs1871043	120	152	0.434286	1	2.78575e-10	0.226168	0.0331641	9.999e-05	7.76504e-07	2.1268e-06	0.000142426	0.092579	0.065726	0.114925
Brain_Cerebellar_Hemisphere	ENSG00000151366.12	NDUFC2	chr11	78068352	78080219	-	7061	1.02806	591.409	119.667	3.14444e-17	chr11_78118381_T_A_b38	38162	chr11	78118381	T	A	1	rs7115572	131	173	0.494286	1	3.03158e-19	0.498689	0.0474531	9.999e-05	7.5655e-15	5.76716e-14	0.00010352	0.295377	0.251556	0.34531
Brain_Cerebellar_Hemisphere	ENSG00000076555.15	ACACB	chr12	109116595	109268226	+	6984	1.04308	803.202	121.737	1.8966e-07	chr12_109124918_A_G_b38	8323	chr12	109124918	A	G	1	rs11065625	78	83	0.237143	1	4.09495e-08	-0.301526	0.051817	9.999e-05	0.000102365	0.000200113	7.9997e-05	-0.276315	-0.372089	-0.199493
Brain_Cerebellar_Hemisphere	ENSG00000168398.6	BDKRB2	chr14	96204679	96244166	+	8698	1.03691	1291.48	123.965	8.11329e-24	chr14_96263805_A_G_b38	59126	chr14	96263805	A	G	1	rs2071084	53	57	0.162857	-1	8.44389e-26	-1.21463	0.0927597	9.999e-05	1.88718e-21	2.88432e-20	4.87828e-05	-2.24173	-2.49338	-1.99615
Brain_Cerebellar_Hemisphere	ENSG00000137806.8	NDUFAF1	chr15	41387349	41402519	-	6332	1.03673	461.581	118.613	4.07603e-15	chr15_41380186_A_G_b38	-22333	chr15	41380186	A	G	1	rs7168431	63	71	0.202857	1	5.31444e-17	-0.582585	0.0605675	9.999e-05	6.86921e-13	4.10054e-12	0.000136404	-0.288923	-0.347099	-0.237431
Brain_Cerebellar_Hemisphere	ENSG00000140443.13	IGF1R	chr15	98648971	98964530	+	9669	1.03157	1465.76	123.135	2.95273e-22	chr15_98957027_G_A_b38	308056	chr15	98957027	G	A	1	rs2593053	111	141	0.402857	1	2.97474e-24	-0.515869	0.0413288	9.999e-05	1.12383e-19	1.42157e-18	4.22492e-05	-0.393766	-0.4535	-0.340604
Brain_Cerebellar_Hemisphere	ENSG00000167720.12	SRR	chr17	2303383	2325260	+	8461	1.03528	1490.57	125.389	3.07485e-28	chr17_2304032_G_A_b38	649	chr17	2304032	G	A	1	rs3744270	105	125	0.357143	1	2.77637e-30	-0.840915	0.0564599	9.999e-05	6.25059e-26	1.61897e-24	4.20465e-05	-0.705543	-0.782372	-0.607216
Brain_Cerebellar_Hemisphere	ENSG00000171298.12	GAA	chr17	80101556	80119879	+	9997	1.02313	1703.87	124.018	7.71124e-32	chr17_80089287_G_A_b38	-12269	chr17	80089287	G	A	1	rs12150060	81	90	0.257143	1	1.61358e-34	-0.952214	0.057206	9.999e-05	2.94597e-29	1.08528e-27	3.53584e-05	-0.750405	-0.823483	-0.658101
Brain_Cerebellar_Hemisphere	ENSG00000174886.12	NDUFA11	chr19	5891276	5904006	-	8886	1.0388	1322.57	122.41	1.9072e-10	chr19_5895347_C_T_b38	-8659	chr19	5895347	C	T	1	rs72989070	46	49	0.14	1	2.24123e-11	-0.333669	0.0457119	9.999e-05	1.37546e-07	4.18507e-07	4.79255e-05	-0.221305	-0.266723	-0.175959
Brain_Cerebellar_Hemisphere	ENSG00000170906.15	NDUFA3	chr19	54102728	54109257	+	12746	1.04071	2368.46	124.321	4.84485e-17	chr19_54099882_A_G_b38	-2846	chr19	54099882	A	G	1	rs661676	47	52	0.148571	1	2.23699e-18	0.510756	0.0502426	9.999e-05	3.35112e-14	2.35282e-13	2.69263e-05	0.398122	0.343691	0.474835
Brain_Cerebellar_Hemisphere	ENSG00000160194.17	NDUFV3	chr21	42879644	42913304	+	8344	1.05996	1149.89	121.21	9.62372e-16	chr21_42913059_G_A_b38	33415	chr21	42913059	G	A	1	rs71320572	80	86	0.245714	1	2.2941e-17	0.628	0.0643161	9.999e-05	2.06859e-13	1.31642e-12	5.89136e-05	0.26116	0.220823	0.298867
Brain_Cerebellar_Hemisphere	ENSG00000184983.9	NDUFA6	chr22	42085525	42090930	-	7183	1.07537	468.545	116.016	2.92446e-35	chr22_42090076_G_A_b38	-854	chr22	42090076	G	A	1	rs1989202	16	16	0.0457143	1	9.05389e-41	1.33544	0.0689917	9.999e-05	5.25542e-35	3.98321e-33	0.000151531	0.731225	0.668297	0.807571
Brain_Cerebellar_Hemisphere	ENSG00000100197.20	CYP2D6	chr22	42126499	42130906	-	7271	1.04485	500.45	116.965	7.61209e-22	chr22_42138592_G_A_b38	7686	chr22	42138592	G	A	1	rs2743450	70	80	0.228571	1	5.61712e-25	0.933583	0.0731175	9.999e-05	5.57575e-20	7.27181e-19	0.000129109	1.14235	0.964652	1.28685
Brain_Cerebellum	ENSG00000168653.10	NDUFS5	chr1	39026318	39034636	+	6847	1.01749	1006.44	157.134	7.51658e-34	chr1_39026790_C_T_b38	472	chr1	39026790	C	T	1	rs3768324	101	120	0.287081	1	2.76267e-36	-0.682324	0.0420643	9.999e-05	2.23273e-31	5.0683e-30	6.71662e-05	-0.369749	-0.403821	-0.332029
Brain_Cerebellum	ENSG00000085832.16	EPS15	chr1	51354263	51519328	-	4443	1.05575	223.704	145.779	9.63605e-14	chr1_51370670_G_A_b38	-148658	chr1	51370670	G	A	1	rs148648502	25	26	0.062201	1	1.06835e-15	0.787314	0.0888539	9.999e-05	5.34993e-12	2.09566e-11	0.000340104	0.391498	0.32679	0.493637
Brain_Cerebellum	ENSG00000134184.12	GSTM1	chr1	109687814	109693745	+	6623	1.04098	945.303	154.477	1.47372e-07	chr1_109675302_G_A_b38	-12512	chr1	109675302	G	A	1	rs611951	56	59	0.141148	-1	3.83937e-08	-0.802975	0.139344	9.999e-05	9.51042e-05	0.000150864	7.69727e-05	-3.99956	-4.77514	-2.95351
Brain_Cerebellum	ENSG00000131791.7	PRKAB2	chr1	147155106	147172550	-	6380	1.04873	643.039	151.489	3.48708e-10	chr1_147238135_C_T_b38	65585	chr1	147238135	C	T	1	rs11239951	156	206	0.492823	1	3.37298e-11	-0.2792	0.039345	9.999e-05	1.04094e-07	2.50112e-07	0.00011586	-0.143861	-0.179976	-0.115185
Brain_Cerebellum	ENSG00000158864.12	NDUFS2	chr1	161197104	161214395	+	7456	1.05095	802.35	151.11	2.25256e-10	chr1_161196933_G_T_b38	-171	chr1	161196933	G	T	1	rs35630547	44	45	0.107656	1	1.95714e-11	-0.440088	0.0611778	9.999e-05	8.01225e-08	1.95096e-07	9.34839e-05	-0.1998	-0.255827	-0.162396
Brain_Cerebellum	ENSG00000198929.12	NOS1AP	chr1	162069774	162370475	+	7637	1.02758	898.174	152.678	1.50792e-25	chr1_162286879_G_T_b38	217105	chr1	162286879	G	T	1	rs3934880	92	101	0.241627	1	4.12143e-28	0.797725	0.059929	9.999e-05	3.33692e-23	3.62431e-22	7.77074e-05	0.505936	0.439325	0.572259
Brain_Cerebellum	ENSG00000023228.13	NDUFS1	chr2	206114817	206159584	-	6870	1.04095	848.699	151.044	3.02467e-11	chr2_206136541_C_T_b38	-23043	chr2	206136541	C	T	1	rs6435325	156	209	0.5	1	2.05817e-12	-0.272372	0.035886	9.999e-05	1.23266e-08	3.31141e-08	8.57257e-05	-0.132334	-0.152639	-0.106547
Brain_Cerebellum	ENSG00000130414.11	NDUFA10	chr2	239892450	240025402	-	10077	1.02874	1655.38	155.764	7.40075e-17	chr2_240026134_A_AT_b38	732	chr2	240026134	A	AT	1	rs535864343	98	121	0.289474	1	3.66785e-18	0.496841	0.0508388	9.999e-05	5.14894e-14	2.42115e-13	4.23173e-05	0.148685	0.130233	0.176899
Brain_Cerebellum	ENSG00000157017.15	GHRL	chr3	10285747	10291451	-	7468	1.04715	1106.38	152.315	1.33824e-09	chr3_10293488_G_C_b38	2037	chr3	10293488	G	C	1	rs10490816	93	109	0.260766	1	1.68953e-10	0.591233	0.0868966	9.999e-05	7.70247e-07	1.653e-06	6.70194e-05	0.674582	0.549936	0.830664
Brain_Cerebellum	ENSG00000132170.19	PPARG	chr3	12287368	12434356	+	7876	1.05785	992.52	152.034	1.53041e-28	chr3_12307030_A_G_b38	19662	chr3	12307030	A	G	1	rs113484502	36	39	0.0933014	1	1.50276e-31	1.43505	0.0987904	9.999e-05	5.42774e-27	8.21398e-26	7.71573e-05	1.63587	1.51565	1.71854
Brain_Cerebellum	ENSG00000114770.16	ABCC5	chr3	183919934	184018015	-	7604	1.05658	944.191	150.813	1.27196e-22	chr3_183922361_GA_G_b38	-95654	chr3	183922361	GA	G	1	rs60053269	143	189	0.452153	1	3.66101e-25	0.50438	0.0410985	9.999e-05	9.95826e-21	8.8648e-20	8.07987e-05	0.224153	0.191068	0.249841
Brain_Cerebellum	ENSG00000123545.5	NDUFAF4	chr6	96889313	96897881	-	7110	1.03846	504.541	149.954	1.26688e-13	chr6_96881088_A_G_b38	-16793	chr6	96881088	A	G	1	rs2149149	60	67	0.160287	-1	3.61782e-15	-0.332631	0.0384064	9.999e-05	2.54875e-11	9.29797e-11	0.000143093	-0.20375	-0.231349	-0.172922
Brain_Cerebellum	ENSG00000106617.13	PRKAG2	chr7	151556111	151877041	-	7561	1.0667	1231.42	152.628	5.94731e-09	chr7_151808590_GT_G_b38	-68451	chr7	151808590	GT	G	1	rs148273464	98	109	0.260766	1	9.16631e-10	-0.504515	0.0777415	9.999e-05	3.23126e-06	6.38656e-06	6.38448e-05	-0.190677	-0.231584	-0.126425
Brain_Cerebellum	ENSG00000254087.7	LYN	chr8	55879813	56014168	+	7973	1.07256	632.253	147.71	1.31882e-07	chr8_55688272_G_A_b38	-191541	chr8	55688272	G	A	1	rs62515219	137	175	0.41866	1	1.65334e-08	-0.354784	0.0598172	9.999e-05	4.08374e-05	6.87437e-05	0.000126497	-0.183635	-0.23921	-0.12243
Brain_Cerebellum	ENSG00000165264.10	NDUFB6	chr9	32553011	32573184	-	8951	1.04176	821.823	150.862	6.97671e-08	chr9_32573149_C_G_b38	-35	chr9	32573149	C	G	1	rs631678	5	5	0.0119617	1	1.14519e-08	1.45873	0.242971	9.999e-05	3.74457e-05	6.34815e-05	8.87495e-05	0.554174	0.404042	0.733972
Brain_Cerebellum	ENSG00000174775.16	HRAS	chr11	532242	537287	-	6400	1.04057	789.58	150.466	9.16489e-12	chr11_534242_A_G_b38	-3045	chr11	534242	A	G	1	rs12628	105	127	0.303828	1	4.89776e-13	-0.286645	0.0365732	9.999e-05	3.32329e-09	9.51307e-09	9.20363e-05	-0.15539	-0.186726	-0.128299
Brain_Cerebellum	ENSG00000006071.12	ABCC8	chr11	17392885	17476845	-	6843	1.06134	708.003	149.624	2.94239e-19	chr11_17400243_G_A_b38	-76602	chr11	17400243	G	A	1	rs2074312	91	109	0.260766	1	1.48799e-21	0.578531	0.0526195	9.999e-05	2.21313e-17	1.45092e-16	0.000109292	0.302197	0.247611	0.353448
Brain_Cerebellum	ENSG00000167792.11	NDUFV1	chr11	67606852	67612535	+	6269	1.02522	584.435	151.39	5.80549e-14	chr11_67607713_T_G_b38	861	chr11	67607713	T	G	1	rs7948073	151	191	0.456938	1	2.04439e-15	0.274791	0.0313883	9.999e-05	1.82759e-11	6.73752e-11	0.000118535	0.099617	0.07803	0.118042
Brain_Cerebellum	ENSG00000110717.12	NDUFS8	chr11	68030627	68036644	+	7034	1.03123	591.643	148.7	7.02077e-08	chr11_68049469_A_G_b38	18842	chr11	68049469	A	G	1	rs2075609	112	129	0.308612	1	9.03242e-09	-0.257208	0.0425112	9.999e-05	2.99042e-05	5.1514e-05	0.000119321	-0.089931	-0.122159	-0.030517
Brain_Cerebellum	ENSG00000151366.12	NDUFC2	chr11	78068352	78080219	-	7061	1.05448	616.002	148.37	8.79768e-20	chr11_78151291_CAG_C_b38	71072	chr11	78151291	CAG	C	1	rs143090884	119	140	0.334928	1	2.55114e-22	-0.603133	0.0535307	9.999e-05	6.87614e-18	4.69439e-17	0.000123063	-0.232658	-0.263814	-0.196021
Brain_Cerebellum	ENSG00000168398.6	BDKRB2	chr14	96204679	96244166	+	8698	1.02812	1255.26	153.8	2.46888e-30	chr14_96263805_A_G_b38	59126	chr14	96263805	A	G	1	rs2071084	66	72	0.172249	-1	3.56692e-33	-1.28364	0.0849867	9.999e-05	5.50246e-28	9.00222e-27	5.56971e-05	-2.26289	-2.47196	-2.10762
Brain_Cerebellum	ENSG00000137806.8	NDUFAF1	chr15	41387349	41402519	-	6332	1.0446	473.845	147.528	1.69504e-18	chr15_41378210_C_G_b38	-24309	chr15	41378210	C	G	1	rs28584379	83	96	0.229665	1	5.73229e-21	-0.749118	0.0694556	9.999e-05	1.67175e-16	1.02219e-15	0.000155261	-0.312185	-0.371464	-0.273417
Brain_Cerebellum	ENSG00000140443.13	IGF1R	chr15	98648971	98964530	+	9669	1.03994	1423.79	152.958	6.1796e-28	chr15_98957027_G_A_b38	308056	chr15	98957027	G	A	1	rs2593053	130	166	0.397129	1	1.06491e-30	-0.609162	0.0428239	9.999e-05	9.46545e-26	1.28719e-24	5.09426e-05	-0.387408	-0.420808	-0.337278
Brain_Cerebellum	ENSG00000140990.14	NDUFB10	chr16	1959508	1961975	+	8673	1.049	1229.3	152.381	3.68874e-08	chr16_1954717_T_C_b38	-4791	chr16	1954717	T	C	1	rs2815301	75	82	0.196172	-1	6.69096e-09	0.32237	0.0527695	9.999e-05	2.71889e-05	4.72398e-05	6.06583e-05	0.146539	0.102744	0.198684
Brain_Cerebellum	ENSG00000167720.12	SRR	chr17	2303383	2325260	+	8461	1.07063	1408.09	153.338	5.67897e-36	chr17_2304032_G_A_b38	649	chr17	2304032	G	A	1	rs3744270	118	138	0.330144	1	1.75919e-39	-0.894302	0.0514359	9.999e-05	4.19002e-35	1.32562e-33	5.64832e-05	-0.755785	-0.822445	-0.6458
Brain_Cerebellum	ENSG00000171298.12	GAA	chr17	80101556	80119879	+	9997	1.04132	1762.35	154.708	2.06417e-48	chr17_80101663_G_C_b38	107	chr17	80101663	G	C	1	rs2304849	86	97	0.232057	1	9.88438e-53	-1.02478	0.0455287	9.999e-05	5.20991e-47	4.97958e-45	4.13315e-05	-0.882882	-0.987092	-0.772976
Brain_Cerebellum	ENSG00000115286.19	NDUFS7	chr19	1383527	1394803	+	10215	1.03778	2038.34	153.816	3.01939e-08	chr19_1388321_G_A_b38	4794	chr19	1388321	G	A	1	rs7254913	129	144	0.344498	-1	6.31644e-09	0.269321	0.044005	9.999e-05	4.19732e-05	7.04597e-05	3.53478e-05	0.138445	0.104012	0.192182
Brain_Cerebellum	ENSG00000174886.12	NDUFA11	chr19	5891276	5904006	-	8886	1.04922	1379.59	152.15	6.10596e-11	chr19_5895347_C_T_b38	-8659	chr19	5895347	C	T	1	rs72989070	62	64	0.15311	1	5.38924e-12	-0.445353	0.0600064	9.999e-05	3.69794e-08	9.36344e-08	5.40866e-05	-0.165365	-0.204765	-0.123179
Brain_Cerebellum	ENSG00000170906.15	NDUFA3	chr19	54102728	54109257	+	12746	1.04842	2434.18	155.797	1.2062e-16	chr19_54108427_A_G_b38	5699	chr19	54108427	A	G	1	rs75622830	52	57	0.136364	1	6.27875e-18	0.621842	0.06419	9.999e-05	7.10887e-14	3.29136e-13	3.05803e-05	0.31961	0.257174	0.370509
Brain_Cerebellum	ENSG00000160194.17	NDUFV3	chr21	42879644	42913304	+	8344	1.04048	1234.93	153.552	2.98344e-18	chr21_42913059_G_A_b38	33415	chr21	42913059	G	A	1	rs71320572	88	95	0.227273	1	6.18135e-20	0.676661	0.0649682	9.999e-05	9.42718e-16	5.29041e-15	5.88307e-05	0.261964	0.209909	0.305669
Brain_Cerebellum	ENSG00000184983.9	NDUFA6	chr22	42085525	42090930	-	7183	1.04524	507.149	147.264	6.94351e-26	chr22_42090076_G_A_b38	-854	chr22	42090076	G	A	1	rs1989202	20	20	0.0478469	1	1.79224e-29	1.76123	0.127705	9.999e-05	3.32889e-24	4.0088e-23	0.00014535	0.703659	0.673903	0.739595
Brain_Cerebellum	ENSG00000100197.20	CYP2D6	chr22	42126499	42130906	-	7271	1.0408	514.313	146.885	5.07025e-29	chr22_42138592_G_A_b38	7686	chr22	42138592	G	A	1	rs2743450	83	95	0.227273	1	3.75832e-33	1.06688	0.070673	9.999e-05	2.3157e-27	3.60661e-26	0.00014139	1.05773	0.942819	1.21113
Brain_Cerebellum	ENSG00000072506.12	HSD17B10	chrX	53431258	53434373	-	2292	1.04108	350.463	160.038	5.09788e-10	chrX_53422619_G_A_b38	-11754	chrX	53422619	G	A	1	rs1264011	113	198	0.473684	-1	1.67796e-10	-0.269546	0.0396094	9.999e-05	9.26985e-08	2.24574e-07	0.000207661	-0.089477	-0.112947	-0.053391
Brain_Cortex	ENSG00000168653.10	NDUFS5	chr1	39026318	39034636	+	6847	1.02085	964.379	152.142	1.30764e-20	chr1_38988113_G_A_b38	-38205	chr1	38988113	G	A	1	rs34848020	142	190	0.463415	1	3.19389e-22	-0.362883	0.0321863	9.999e-05	5.55198e-18	6.09423e-17	5.60293e-05	-0.212721	-0.254536	-0.173276
Brain_Cortex	ENSG00000134184.12	GSTM1	chr1	109687814	109693745	+	6623	1.05531	882.765	148.097	6.72385e-08	chr1_109675302_G_A_b38	-12512	chr1	109675302	G	A	1	rs611951	55	57	0.139024	-1	1.20431e-08	-0.81301	0.135473	0.00019998	3.38152e-05	8.03759e-05	6.85603e-05	-4.8814	-5.94246	-4.01097
Brain_Cortex	ENSG00000158864.12	NDUFS2	chr1	161197104	161214395	+	7456	1.05175	763.566	146.421	1.50355e-08	chr1_161214307_A_G_b38	17203	chr1	161214307	A	G	1	rs1136224	40	44	0.107317	1	1.84694e-09	0.35842	0.056304	9.999e-05	6.22955e-06	1.6855e-05	7.83625e-05	0.198681	0.151246	0.25036
Brain_Cortex	ENSG00000007933.12	FMO3	chr1	171090877	171117819	+	7905	1.05931	595.155	145.535	1.35773e-07	chr1_171141912_CCTT_C_b38	51035	chr1	171141912	CCTT	C	1	rs67209179	91	106	0.258537	1	1.98366e-08	-0.428756	0.0726452	9.999e-05	4.50137e-05	0.000104602	0.000102994	-0.700012	-1.1083	-0.507331
Brain_Cortex	ENSG00000023228.13	NDUFS1	chr2	206114817	206159584	-	6870	1.02567	886.571	149.29	1.86591e-13	chr2_206145834_G_T_b38	-13750	chr2	206145834	G	T	1	rs6435330	146	202	0.492683	-1	1.01995e-14	-0.301187	0.0353949	9.999e-05	9.17804e-11	4.7287e-10	6.19456e-05	-0.139098	-0.164746	-0.110796
Brain_Cortex	ENSG00000130414.11	NDUFA10	chr2	239892450	240025402	-	10077	1.06498	1628.72	150.691	1.11791e-13	chr2_239963094_G_A_b38	-62308	chr2	239963094	G	A	1	rs6748327	98	123	0.3	1	7.7364e-15	0.365236	0.0426906	9.999e-05	4.11971e-11	2.22151e-10	3.83186e-05	0.139403	0.105624	0.173567
Brain_Cortex	ENSG00000142330.19	CAPN10	chr2	240586716	240617705	+	9651	1.06258	1257.04	147.243	1.26759e-09	chr2_240587445_C_T_b38	729	chr2	240587445	C	T	1	rs67448739	59	63	0.153659	1	1.29058e-10	-0.459391	0.066927	9.999e-05	6.72161e-07	2.09772e-06	4.92736e-05	-0.242912	-0.306296	-0.202995
Brain_Cortex	ENSG00000157017.15	GHRL	chr3	10285747	10291451	-	7468	1.02767	1229.91	151.9	6.35966e-08	chr3_10273419_G_T_b38	-18032	chr3	10273419	G	T	1	rs164938	139	179	0.436585	1	1.72538e-08	0.482615	0.0813869	9.999e-05	5.94925e-05	0.000135292	4.49542e-05	0.607318	0.46989	0.754342
Brain_Cortex	ENSG00000114770.16	ABCC5	chr3	183919934	184018015	-	7604	1.05059	986.09	147.984	9.32887e-11	chr3_183917710_T_A_b38	-100305	chr3	183917710	T	A	1	rs13066518	139	181	0.441463	1	7.8711e-12	0.262483	0.035623	9.999e-05	3.96433e-08	1.46968e-07	6.04538e-05	0.142572	0.10726	0.17947
Brain_Cortex	ENSG00000170606.14	HSPA4	chr5	133051962	133106449	+	6836	1.06912	790.376	145.39	4.47025e-11	chr5_133067046_T_C_b38	15084	chr5	133067046	T	C	1	rs62375211	75	79	0.192683	1	2.23144e-12	0.349868	0.0460944	9.999e-05	1.04656e-08	4.17241e-08	7.99916e-05	0.26475	0.221285	0.32549
Brain_Cortex	ENSG00000123545.5	NDUFAF4	chr6	96889313	96897881	-	7110	1.0405	583.411	150.385	1.02011e-16	chr6_96822328_C_G_b38	-75553	chr6	96822328	C	G	1	rs75638678	45	48	0.117073	1	3.3861e-18	0.461641	0.0470361	9.999e-05	1.70351e-14	1.31909e-13	9.88802e-05	0.34781	0.282526	0.399816
Brain_Cortex	ENSG00000146477.5	SLC22A3	chr6	160348268	160452581	+	8277	1.04298	805.764	146.921	2.86042e-13	chr6_160442500_T_C_b38	94232	chr6	160442500	T	C	1	rs2048327	115	153	0.373171	1	1.00697e-14	0.420163	0.0493643	9.999e-05	8.71638e-11	4.5059e-10	7.21786e-05	0.646518	0.530664	0.783795
Brain_Cortex	ENSG00000257335.8	MGAM	chr7	141907813	142106747	+	6643	1.06684	725.075	147.888	6.06938e-10	chr7_141756606_G_A_b38	-151207	chr7	141756606	G	A	1	rs13230324	146	196	0.478049	1	6.23517e-11	-0.439502	0.0628133	9.999e-05	1.60609e-07	5.48807e-07	8.65746e-05	-1.00983	-1.28052	-0.763873
Brain_Cortex	ENSG00000174775.16	HRAS	chr11	532242	537287	-	6400	1.04136	853.539	149.596	1.53738e-14	chr11_539080_G_T_b38	1793	chr11	539080	G	T	1	rs11246177	101	119	0.291667	1	6.94124e-16	-0.366748	0.0409602	9.999e-05	4.57239e-12	2.71565e-11	6.7779e-05	-0.206805	-0.245968	-0.160916
Brain_Cortex	ENSG00000006071.12	ABCC8	chr11	17392885	17476845	-	6843	1.04191	690.06	146.953	7.61939e-10	chr11_17400243_G_A_b38	-76602	chr11	17400243	G	A	1	rs2074312	93	108	0.263415	1	6.99777e-11	0.346267	0.0496372	9.999e-05	2.81674e-07	9.30866e-07	8.3986e-05	0.274796	0.207195	0.340775
Brain_Cortex	ENSG00000089250.18	NOS1	chr12	117208142	117452170	-	7654	1.05366	1176.27	150.417	5.83536e-10	chr12_117441541_A_G_b38	-10629	chr12	117441541	A	G	1	rs3844050	139	170	0.414634	1	8.63584e-11	-0.442887	0.0638385	9.999e-05	3.13023e-07	1.02567e-06	5.11827e-05	-0.416613	-0.512566	-0.327759
Brain_Cortex	ENSG00000137806.8	NDUFAF1	chr15	41387349	41402519	-	6332	1.0367	460.777	143.231	1.2858e-27	chr15_41380186_A_G_b38	-22333	chr15	41380186	A	G	1	rs7168431	81	94	0.229268	1	1.41954e-31	-0.8668	0.0593011	9.999e-05	7.52685e-26	1.74558e-24	0.00012364	-0.438181	-0.501241	-0.388142
Brain_Cortex	ENSG00000167720.12	SRR	chr17	2303383	2325260	+	8461	1.04302	1492.04	152.206	7.41248e-31	chr17_2254523_C_T_b38	-48860	chr17	2254523	C	T	1	rs112258894	117	143	0.34878	1	2.57283e-33	-0.763052	0.0500502	9.999e-05	7.5174e-29	2.34212e-27	3.89857e-05	-0.520027	-0.585211	-0.468025
Brain_Cortex	ENSG00000181856.14	SLC2A4	chr17	7281667	7288251	+	8013	1.06066	1157.17	147.42	1.19115e-10	chr17_7276158_A_AAAAT_b38	-5509	chr17	7276158	A	AAAAT	1	rs139186084	143	178	0.434146	-1	9.43607e-12	0.350585	0.0477884	9.999e-05	5.14746e-08	1.87894e-07	5.32016e-05	0.611489	0.478457	0.773154
Brain_Cortex	ENSG00000179593.15	ALOX15B	chr17	8039017	8049134	+	7089	1.04095	1156.22	151.368	2.53741e-08	chr17_8064347_G_C_b38	25330	chr17	8064347	G	C	1	rs7215842	82	99	0.241463	1	5.99496e-09	-0.449836	0.0732828	0.00019998	1.87968e-05	4.68317e-05	4.99691e-05	-1.09974	-1.47387	-0.606637
Brain_Cortex	ENSG00000171298.12	GAA	chr17	80101556	80119879	+	9997	1.04121	1794.99	151.143	2.47407e-27	chr17_80101429_C_T_b38	-127	chr17	80101429	C	T	1	rs2304850	73	84	0.204878	1	1.07685e-29	-0.67823	0.0486453	9.999e-05	4.75733e-25	1.01431e-23	3.22149e-05	-0.390392	-0.433096	-0.349376
Brain_Cortex	ENSG00000105675.8	ATP4A	chr19	35550043	35563658	-	7653	1.04672	940.713	147.275	6.94649e-08	chr19_35569874_A_G_b38	6216	chr19	35569874	A	G	1	rs12983627	74	85	0.207317	1	1.1374e-08	0.349978	0.0582076	9.999e-05	4.08161e-05	9.56407e-05	6.25818e-05	0.46014	0.238697	0.596901
Brain_Cortex	ENSG00000170906.15	NDUFA3	chr19	54102728	54109257	+	12746	1.03028	2257.85	150.482	1.78083e-13	chr19_54108427_A_G_b38	5699	chr19	54108427	A	G	1	rs75622830	46	48	0.117073	1	1.2342e-14	0.491301	0.0579535	9.999e-05	2.06145e-10	1.01789e-09	2.47026e-05	0.297172	0.251052	0.346692
Brain_Cortex	ENSG00000101076.16	HNF4A	chr20	44355700	44434596	+	6658	1.03909	1016.9	152.029	6.59223e-17	chr20_44424948_A_T_b38	69248	chr20	44424948	A	T	1	rs6073435	137	184	0.44878	-1	3.19548e-18	0.570068	0.0580289	9.999e-05	2.01359e-14	1.54754e-13	5.64692e-05	0.945131	0.814977	1.17037
Brain_Cortex	ENSG00000100191.5	SLC5A4	chr22	32218476	32255341	-	8455	1.03344	797.691	146.711	2.12979e-13	chr22_32353798_TAC_T_b38	98457	chr22	32353798	TAC	T	1	rs139145314	26	26	0.0634146	1	6.9223e-15	1.30268	0.151936	9.999e-05	7.89198e-11	4.10265e-10	7.06564e-05	1.79036	1.61481	1.99082
Brain_Cortex	ENSG00000184983.9	NDUFA6	chr22	42085525	42090930	-	7183	1.04934	471.866	142.232	3.43417e-22	chr22_42090076_G_A_b38	-854	chr22	42090076	G	A	1	rs1989202	14	14	0.0341463	1	1.70458e-25	1.43801	0.115559	9.999e-05	1.87563e-20	2.63766e-19	0.000125818	0.509573	0.437601	0.555466
Brain_Cortex	ENSG00000100197.20	CYP2D6	chr22	42126499	42130906	-	7271	1.03288	486.927	141.894	1.86117e-30	chr22_42138673_C_T_b38	7767	chr22	42138673	C	T	1	rs2743451	143	190	0.463415	-1	3.71461e-35	0.812233	0.0510349	9.999e-05	1.15342e-28	3.47654e-27	0.000115531	1.21318	1.10184	1.31095
Brain_Frontal_Cortex_BA9	ENSG00000168653.10	NDUFS5	chr1	39026318	39034636	+	6847	1.03399	850.881	122.027	2.41983e-11	chr1_38988113_G_A_b38	-38205	chr1	38988113	G	A	1	rs34848020	123	163	0.465714	1	2.13304e-12	-0.253424	0.0327594	9.999e-05	1.1117e-08	7.00517e-08	4.6582e-05	-0.155854	-0.210772	-0.122508
Brain_Frontal_Cortex_BA9	ENSG00000158864.12	NDUFS2	chr1	161197104	161214395	+	7456	1.03229	781.867	122.238	1.19413e-07	chr1_161214307_A_G_b38	17203	chr1	161214307	A	G	1	rs1136224	44	48	0.137143	1	2.62218e-08	0.265463	0.0449032	0.00029997	6.82289e-05	0.000227501	5.03811e-05	0.173768	0.124535	0.207797
Brain_Frontal_Cortex_BA9	ENSG00000094963.13	FMO2	chr1	171185208	171211230	+	7658	1.05591	581.271	118.863	1.97892e-07	chr1_171169707_A_AT_b38	-15501	chr1	171169707	A	AT	1	rs35824164	123	167	0.477143	1	2.94791e-08	-0.4146	0.0704194	0.00019998	6.75871e-05	0.000225712	7.37265e-05	-1.17426	-1.43355	-0.894426
Brain_Frontal_Cortex_BA9	ENSG00000023228.13	NDUFS1	chr2	206114817	206159584	-	6870	1.0341	864.053	122.238	3.19363e-23	chr2_206108581_C_T_b38	-51003	chr2	206108581	C	T	1	rs929646	127	173	0.494286	-1	1.74065e-25	-0.350378	0.027015	9.999e-05	5.85487e-21	1.7343e-19	4.58902e-05	-0.194378	-0.220961	-0.16858
Brain_Frontal_Cortex_BA9	ENSG00000130414.11	NDUFA10	chr2	239892450	240025402	-	10077	1.02646	1597.81	124.664	2.03208e-09	chr2_240027895_G_A_b38	2493	chr2	240027895	G	A	1	rs10166776	93	118	0.337143	1	4.38297e-10	-0.216175	0.0321122	9.999e-05	2.29776e-06	1.00576e-05	2.41334e-05	-0.134155	-0.178382	-0.10427
Brain_Frontal_Cortex_BA9	ENSG00000114770.16	ABCC5	chr3	183919934	184018015	-	7604	1.05494	956.183	121.197	8.70019e-10	chr3_183922361_GA_G_b38	-95654	chr3	183922361	GA	G	1	rs60053269	115	151	0.431429	1	9.62803e-11	0.206712	0.029431	9.999e-05	3.76334e-07	1.91449e-06	4.46684e-05	0.113136	0.071145	0.151668
Brain_Frontal_Cortex_BA9	ENSG00000123545.5	NDUFAF4	chr6	96889313	96897881	-	7110	1.04235	508.086	120.221	5.29784e-11	chr6_96789237_T_A_b38	-108644	chr6	96789237	T	A	1	rs558418	41	45	0.128571	1	3.51272e-12	0.321595	0.0420709	9.999e-05	1.26301e-08	7.90737e-08	8.0394e-05	0.346291	0.302613	0.404155
Brain_Frontal_Cortex_BA9	ENSG00000146477.5	SLC22A3	chr6	160348268	160452581	+	8277	1.08418	694.626	116.306	2.71626e-09	chr6_160442500_T_C_b38	94232	chr6	160442500	T	C	1	rs2048327	97	124	0.354286	1	1.4556e-10	0.467741	0.0673533	9.999e-05	5.99038e-07	2.9384e-06	6.79545e-05	0.685765	0.567511	0.832776
Brain_Frontal_Cortex_BA9	ENSG00000257335.8	MGAM	chr7	141907813	142106747	+	6643	1.02686	714.733	122.647	1.35407e-09	chr7_141814209_T_C_b38	-93604	chr7	141814209	T	C	1	rs34285424	119	160	0.457143	1	2.01876e-10	-0.500564	0.0727377	9.999e-05	6.59504e-07	3.20448e-06	5.40292e-05	-1.04991	-1.32628	-0.81018
Brain_Frontal_Cortex_BA9	ENSG00000174775.16	HRAS	chr11	532242	537287	-	6400	1.03916	846.78	122.001	1.47559e-09	chr11_538940_G_A_b38	1653	chr11	538940	G	A	1	rs12420647	90	109	0.311429	1	1.98844e-10	-0.290026	0.0421263	9.999e-05	7.2143e-07	3.46875e-06	4.76905e-05	-0.182475	-0.222864	-0.115848
Brain_Frontal_Cortex_BA9	ENSG00000006071.12	ABCC8	chr11	17392885	17476845	-	6843	1.06623	781.214	123.069	2.14242e-11	chr11_17391217_G_A_b38	-85628	chr11	17391217	G	A	1	rs77023203	94	119	0.34	1	2.31164e-12	0.297459	0.0385252	9.999e-05	4.96523e-09	3.3205e-08	5.68574e-05	0.326554	0.257095	0.406678
Brain_Frontal_Cortex_BA9	ENSG00000089250.18	NOS1	chr12	117208142	117452170	-	7654	1.05704	1147.13	123.214	1.23634e-07	chr12_117444295_A_G_b38	-7875	chr12	117444295	A	G	1	rs10774924	126	165	0.471429	1	3.09206e-08	-0.352393	0.0599545	9.999e-05	8.34265e-05	0.000273904	3.75079e-05	-0.379742	-0.489106	-0.272085
Brain_Frontal_Cortex_BA9	ENSG00000137806.8	NDUFAF1	chr15	41387349	41402519	-	6332	1.04765	484.265	119.18	5.30601e-18	chr15_41468592_C_G_b38	66073	chr15	41468592	C	G	1	rs111421683	64	78	0.224138	1	3.42476e-20	-0.733602	0.0674106	9.999e-05	5.07633e-16	8.35381e-15	8.59561e-05	-0.373205	-0.442886	-0.295716
Brain_Frontal_Cortex_BA9	ENSG00000167720.12	SRR	chr17	2303383	2325260	+	8461	1.0716	1265.68	121.197	2.94624e-24	chr17_2304032_G_A_b38	649	chr17	2304032	G	A	1	rs3744270	105	123	0.351429	1	7.6343e-27	-0.763348	0.0565039	9.999e-05	1.24453e-22	4.45089e-21	3.57462e-05	-0.565698	-0.630769	-0.493118
Brain_Frontal_Cortex_BA9	ENSG00000171298.12	GAA	chr17	80101556	80119879	+	9997	1.04877	1740.58	123.833	1.66828e-13	chr17_80101663_G_C_b38	107	chr17	80101663	G	C	1	rs2304849	75	85	0.242857	1	1.36609e-14	-0.463606	0.0536179	9.999e-05	9.73948e-11	8.33847e-10	2.40115e-05	-0.310892	-0.350523	-0.230738
Brain_Frontal_Cortex_BA9	ENSG00000170906.15	NDUFA3	chr19	54102728	54109257	+	12746	1.03426	2375.73	124.255	3.41289e-08	chr19_54099882_A_G_b38	-2846	chr19	54099882	A	G	1	rs661676	43	50	0.142857	1	8.74741e-09	0.344846	0.0561885	9.999e-05	5.78505e-05	0.000196386	1.67004e-05	0.285474	0.221276	0.350527
Brain_Frontal_Cortex_BA9	ENSG00000101076.16	HNF4A	chr20	44355700	44434596	+	6658	1.05784	833.906	120.406	2.27269e-10	chr20_44429456_C_G_b38	73756	chr20	44429456	C	G	1	rs3746575	120	155	0.442857	-1	1.86152e-11	0.433789	0.0591461	9.999e-05	7.54679e-08	4.23402e-07	5.17397e-05	0.727668	0.401393	0.930541
Brain_Frontal_Cortex_BA9	ENSG00000100191.5	SLC5A4	chr22	32218476	32255341	-	8455	1.0407	814.61	121.368	2.82378e-10	chr22_32354162_A_C_b38	98821	chr22	32354162	A	C	1	rs5998434	19	19	0.0542857	1	2.84579e-11	1.10455	0.152257	9.999e-05	1.21308e-07	6.59979e-07	4.9849e-05	1.79459	1.51791	2.0595
Brain_Frontal_Cortex_BA9	ENSG00000184983.9	NDUFA6	chr22	42085525	42090930	-	7183	1.03099	503.901	118.56	1.50921e-18	chr22_42090076_G_A_b38	-854	chr22	42090076	G	A	1	rs1989202	18	18	0.0514286	1	6.545e-21	1.0201	0.0913612	9.999e-05	2.55144e-16	4.36534e-15	7.78013e-05	0.483689	0.431561	0.529562
Brain_Frontal_Cortex_BA9	ENSG00000100197.20	CYP2D6	chr22	42126499	42130906	-	7271	1.06481	515.716	117.532	5.15365e-16	chr22_42138673_C_T_b38	7767	chr22	42138673	C	T	1	rs2743451	129	168	0.48	-1	3.56897e-18	0.682044	0.0676269	9.999e-05	3.95461e-14	5.35969e-13	8.57053e-05	1.08676	0.900915	1.207
Brain_Frontal_Cortex_BA9	ENSG00000169083.16	AR	chrX	67544032	67730619	+	3880	1.01343	226.261	124.005	3.1623e-10	chrX_67638479_G_A_b38	94447	chrX	67638479	G	A	1	rs4459010	45	79	0.225714	-1	5.21671e-11	0.64421	0.0902245	9.999e-05	5.70439e-08	3.25328e-07	0.000162346	0.624129	0.503955	0.797431
Brain_Hippocampus	ENSG00000177807.8	KCNJ10	chr1	159998651	160070483	-	7682	1.04911	830.159	113.123	1.58394e-07	chr1_160100122_C_T_b38	29639	chr1	160100122	C	T	1	rs11265320	115	142	0.430303	1	3.54752e-08	0.220022	0.0374346	0.00019998	8.29688e-05	0.000389498	3.71171e-05	0.23095	0.173754	0.284741
Brain_Hippocampus	ENSG00000023228.13	NDUFS1	chr2	206114817	206159584	-	6870	1.03134	888.398	113.977	1.1457e-10	chr2_206128713_T_A_b38	-30871	chr2	206128713	T	A	1	rs7558619	118	157	0.496835	1	1.4567e-11	-0.2382	0.0320399	9.999e-05	6.06273e-08	5.31192e-07	3.23779e-05	-0.151075	-0.179374	-0.113586
Brain_Hippocampus	ENSG00000130414.11	NDUFA10	chr2	239892450	240025402	-	10077	1.04458	1521.81	114.514	2.777e-10	chr2_240024509_G_T_b38	-893	chr2	240024509	G	T	1	rs7588754	87	106	0.321212	1	4.26639e-11	-0.273246	0.0378011	9.999e-05	2.15428e-07	1.66848e-06	1.99e-05	-0.165196	-0.203809	-0.110691
Brain_Hippocampus	ENSG00000114770.16	ABCC5	chr3	183919934	184018015	-	7604	1.04035	964.506	113.171	1.56006e-08	chr3_183923077_G_T_b38	-94938	chr3	183923077	G	T	1	rs7646621	117	161	0.487879	1	2.77788e-09	0.23909	0.0373319	9.999e-05	9.44536e-06	5.4549e-05	3.08899e-05	0.196057	0.154996	0.243611
Brain_Hippocampus	ENSG00000123545.5	NDUFAF4	chr6	96889313	96897881	-	7110	1.06324	533.682	112.109	9.24617e-08	chr6_96787688_T_C_b38	-110193	chr6	96787688	T	C	1	rs850434	49	50	0.151515	1	1.69142e-08	0.271215	0.0449547	9.999e-05	2.56295e-05	0.000133775	6.08918e-05	0.330989	0.241588	0.38848
Brain_Hippocampus	ENSG00000174775.16	HRAS	chr11	532242	537287	-	6400	1.03676	818.673	112.781	1.38084e-07	chr11_540158_A_G_b38	2871	chr11	540158	A	G	1	rs4963127	90	114	0.345455	1	2.90633e-08	-0.193777	0.0327349	9.999e-05	7.96567e-05	0.000375872	3.58885e-05	-0.169464	-0.213199	-0.121532
Brain_Hippocampus	ENSG00000006071.12	ABCC8	chr11	17392885	17476845	-	6843	1.02844	736.054	114.111	9.87043e-10	chr11_17476247_C_G_b38	-598	chr11	17476247	C	G	1	rs985136	116	156	0.472727	1	1.57818e-10	0.285199	0.0408901	9.999e-05	4.80108e-07	3.4994e-06	3.86348e-05	0.405074	0.30533	0.493369
Brain_Hippocampus	ENSG00000151366.12	NDUFC2	chr11	78068352	78080219	-	7061	1.0218	647.253	112.817	1.67429e-07	chr11_78022864_C_G_b38	-57355	chr11	78022864	C	G	1	rs7124562	65	75	0.227273	-1	3.61467e-08	0.171496	0.0291981	9.999e-05	8.79799e-05	0.000410225	4.27909e-05	0.123474	0.087174	0.161079
Brain_Hippocampus	ENSG00000089250.18	NOS1	chr12	117208142	117452170	-	7654	1.00426	1045.78	113.708	1.01068e-11	chr12_117442206_A_G_b38	-9964	chr12	117442206	A	G	1	rs11068491	118	143	0.433333	1	9.59318e-13	-0.5409	0.0680603	9.999e-05	9.7557e-09	9.576e-08	2.46637e-05	-0.633456	-0.805067	-0.479387
Brain_Hippocampus	ENSG00000167720.12	SRR	chr17	2303383	2325260	+	8461	1.03466	1372.81	115.405	2.93269e-17	chr17_2304032_G_A_b38	649	chr17	2304032	G	A	1	rs3744270	97	113	0.342424	1	1.43277e-18	-0.631793	0.0608983	9.999e-05	1.36178e-14	3.18423e-13	2.12277e-05	-0.503091	-0.59177	-0.429827
Brain_Hippocampus	ENSG00000171298.12	GAA	chr17	80101556	80119879	+	9997	1.03732	1717.71	114.343	2.53464e-13	chr17_80102793_A_C_b38	1237	chr17	80102793	A	C	1	rs12450199	102	129	0.390909	1	1.98173e-14	-0.52034	0.0600676	9.999e-05	1.91614e-10	2.50037e-09	1.71424e-05	-0.367886	-0.458098	-0.297544
Brain_Hippocampus	ENSG00000160194.17	NDUFV3	chr21	42879644	42913304	+	8344	1.04521	1059.27	111.865	3.99367e-08	chr21_42908168_G_A_b38	28524	chr21	42908168	G	A	1	rs35893787	59	60	0.181818	1	6.40243e-09	0.440943	0.0707308	9.999e-05	2.6306e-05	0.000136853	2.86585e-05	0.232122	0.16097	0.289118
Brain_Hippocampus	ENSG00000184983.9	NDUFA6	chr22	42085525	42090930	-	7183	1.04993	440.48	108.02	1.14442e-14	chr22_42090076_G_A_b38	-854	chr22	42090076	G	A	1	rs1989202	15	15	0.0454545	1	9.62186e-17	0.693896	0.0720979	9.999e-05	1.34581e-12	2.41792e-11	7.01693e-05	0.47679	0.411803	0.557508
Brain_Hippocampus	ENSG00000100197.20	CYP2D6	chr22	42126499	42130906	-	7271	1.02848	511.203	110.059	2.37803e-21	chr22_42142896_G_A_b38	11990	chr22	42142896	G	A	1	rs2854740	119	155	0.469697	-1	4.8365e-24	0.762195	0.0604146	9.999e-05	3.70966e-19	1.48028e-17	5.56361e-05	1.19195	1.08693	1.33472
Brain_Hypothalamus	ENSG00000023228.13	NDUFS1	chr2	206114817	206159584	-	6870	1.03175	787.082	116.429	7.97943e-08	chr2_206101113_T_G_b38	-58471	chr2	206101113	T	G	1	rs6718656	124	166	0.488235	-1	1.40278e-08	-0.222256	0.0367013	9.999e-05	4.55604e-05	0.00022715	3.46688e-05	-0.125025	-0.16463	-0.091883
Brain_Hypothalamus	ENSG00000130414.11	NDUFA10	chr2	239892450	240025402	-	10077	1.04251	1581.7	120.415	1.72157e-11	chr2_239975890_C_T_b38	-49512	chr2	239975890	C	T	1	rs4149556	78	98	0.288235	1	2.71858e-12	0.309641	0.0401061	9.999e-05	1.27479e-08	1.2208e-07	1.79997e-05	0.197096	0.161013	0.23545
Brain_Hypothalamus	ENSG00000180767.9	CHST13	chr3	126524283	126543291	+	9352	1.04865	755.798	116.594	5.58755e-08	chr3_126528952_C_T_b38	4669	chr3	126528952	C	T	1	rs11717719	116	143	0.420588	-1	9.66339e-09	0.574494	0.0936801	0.00019998	2.53256e-05	0.000133369	3.85773e-05	1.07422	0.732886	1.34197
Brain_Hypothalamus	ENSG00000123545.5	NDUFAF4	chr6	96889313	96897881	-	7110	1.04658	496.325	115.87	1.10681e-10	chr6_96822328_C_G_b38	-75553	chr6	96822328	C	G	1	rs75638678	44	48	0.141176	1	8.18872e-12	0.382477	0.0508981	9.999e-05	2.47077e-08	2.24217e-07	5.82746e-05	0.335555	0.298211	0.39762
Brain_Hypothalamus	ENSG00000257335.8	MGAM	chr7	141907813	142106747	+	6643	1.0448	706.063	118.435	2.72324e-13	chr7_141801947_C_G_b38	-105866	chr7	141801947	C	G	1	rs12703408	119	161	0.473529	1	1.89904e-14	-0.656547	0.0760999	9.999e-05	6.92078e-11	9.14888e-10	4.06827e-05	-1.36905	-1.58203	-1.11173
Brain_Hypothalamus	ENSG00000174775.16	HRAS	chr11	532242	537287	-	6400	1.06089	765.441	115.172	4.60005e-10	chr11_636199_C_T_b38	98912	chr11	636199	C	T	1	rs936460	89	101	0.297059	-1	3.52426e-11	0.325679	0.0449914	9.999e-05	1.38702e-07	1.11564e-06	3.99167e-05	0.240903	0.189524	0.297694
Brain_Hypothalamus	ENSG00000006071.12	ABCC8	chr11	17392885	17476845	-	6843	1.04331	674.581	116.454	2.67095e-13	chr11_17476247_C_G_b38	-598	chr11	17476247	C	G	1	rs985136	120	162	0.476471	1	1.11729e-14	0.453857	0.0520314	9.999e-05	6.69004e-11	8.85394e-10	4.23348e-05	0.575179	0.454872	0.721632
Brain_Hypothalamus	ENSG00000137806.8	NDUFAF1	chr15	41387349	41402519	-	6332	1.0495	416.969	112.671	2.57726e-09	chr15_41419316_T_G_b38	16797	chr15	41419316	T	G	1	rs8027626	86	104	0.311377	1	1.55367e-10	-0.371749	0.0534582	9.999e-05	5.32634e-07	3.843e-06	7.01521e-05	-0.19778	-0.24882	-0.151065
Brain_Hypothalamus	ENSG00000167720.12	SRR	chr17	2303383	2325260	+	8461	1.05024	1314.71	119.196	1.17076e-18	chr17_2304032_G_A_b38	649	chr17	2304032	G	A	1	rs3744270	101	118	0.347059	1	3.26372e-20	-0.760364	0.0693441	9.999e-05	2.7137e-16	7.06211e-15	2.23142e-05	-0.509618	-0.633578	-0.412378
Brain_Hypothalamus	ENSG00000171298.12	GAA	chr17	80101556	80119879	+	9997	1.02995	1809.41	121.342	7.96271e-15	chr17_80101663_G_C_b38	107	chr17	80101663	G	C	1	rs2304849	62	69	0.202941	1	8.86741e-16	-0.497479	0.0542216	9.999e-05	6.73486e-12	1.00864e-10	1.49732e-05	-0.404799	-0.459448	-0.359557
Brain_Hypothalamus	ENSG00000176105.13	YES1	chr18	721588	812546	-	7891	1.03694	1169.49	120.339	5.1952e-08	chr18_812421_A_G_b38	-125	chr18	812421	A	G	1	rs7240974	100	122	0.358824	1	1.51653e-08	0.190769	0.0315857	9.999e-05	4.17717e-05	0.000210247	2.38175e-05	0.237485	0.19114	0.311422
Brain_Hypothalamus	ENSG00000170906.15	NDUFA3	chr19	54102728	54109257	+	12746	1.01828	2570.86	122.522	1.1896e-10	chr19_54108427_A_G_b38	5699	chr19	54108427	A	G	1	rs75622830	38	43	0.126471	1	3.24422e-11	0.458109	0.0631487	9.999e-05	2.30654e-07	1.77646e-06	1.00539e-05	0.417928	0.342689	0.506655
Brain_Hypothalamus	ENSG00000184983.9	NDUFA6	chr22	42085525	42090930	-	7183	1.05705	487.067	114.067	1.11703e-16	chr22_42090076_G_A_b38	-854	chr22	42090076	G	A	1	rs1989202	18	18	0.0529412	1	8.44016e-19	0.856356	0.0823574	9.999e-05	9.2914e-15	1.99708e-13	6.18203e-05	0.564767	0.510549	0.61668
Brain_Hypothalamus	ENSG00000100197.20	CYP2D6	chr22	42126499	42130906	-	7271	1.05688	455.869	111.757	1.07299e-25	chr22_42138139_T_C_b38	7233	chr22	42138139	T	C	1	rs2743449	126	165	0.485294	-1	1.22851e-29	0.679808	0.0459673	9.999e-05	2.56826e-24	1.82877e-22	6.60079e-05	1.36239	1.25241	1.52279
Brain_Nucleus_accumbens_basal_ganglia	ENSG00000168653.10	NDUFS5	chr1	39026318	39034636	+	6847	1.01907	981.536	149.723	7.30016e-10	chr1_39017244_CTGTA_C_b38	-9074	chr1	39017244	CTGTA	C	1	rs146087529	98	113	0.279703	1	1.47651e-10	-0.213103	0.03112	9.999e-05	5.42657e-07	2.09802e-06	4.68606e-05	-0.205791	-0.247817	-0.163143
Brain_Nucleus_accumbens_basal_ganglia	ENSG00000134184.12	GSTM1	chr1	109687814	109693745	+	6623	1.04064	865.535	145.737	4.03559e-08	chr1_109713453_A_G_b38	25639	chr1	109713453	A	G	1	rs2479390	75	88	0.217822	1	7.1038e-09	-0.674756	0.110411	9.999e-05	2.26146e-05	6.81351e-05	5.72762e-05	-5.87563	-6.64386	-5.20973
Brain_Nucleus_accumbens_basal_ganglia	ENSG00000158864.12	NDUFS2	chr1	161197104	161214395	+	7456	1.05935	817.044	145.753	4.33275e-09	chr1_161214307_A_G_b38	17203	chr1	161214307	A	G	1	rs1136224	56	61	0.15099	1	5.99402e-10	0.323054	0.0490473	9.999e-05	1.63735e-06	5.86933e-06	6.461e-05	0.221564	0.165381	0.277018
Brain_Nucleus_accumbens_basal_ganglia	ENSG00000023228.13	NDUFS1	chr2	206114817	206159584	-	6870	1.01259	911.881	147.335	1.07288e-12	chr2_206145834_G_T_b38	-13750	chr2	206145834	G	T	1	rs6435330	151	201	0.497525	1	8.14697e-14	-0.279646	0.0342129	9.999e-05	7.49451e-10	4.36175e-09	4.92901e-05	-0.165126	-0.194474	-0.132259
Brain_Nucleus_accumbens_basal_ganglia	ENSG00000130414.11	NDUFA10	chr2	239892450	240025402	-	10077	1.03013	1612.54	149.027	2.32033e-09	chr2_240027895_G_A_b38	2493	chr2	240027895	G	A	1	rs10166776	115	141	0.34901	1	4.69353e-10	-0.231041	0.0348343	9.999e-05	2.53465e-06	8.88008e-06	2.96516e-05	-0.15034	-0.21567	-0.108545
Brain_Nucleus_accumbens_basal_ganglia	ENSG00000180767.9	CHST13	chr3	126524283	126543291	+	9352	1.03248	705.055	143.743	2.92045e-08	chr3_126540526_G_A_b38	16243	chr3	126540526	G	A	1	rs13079087	110	131	0.324257	1	3.88652e-09	-0.57094	0.0916567	9.999e-05	1.4301e-05	4.47614e-05	6.8369e-05	-1.41085	-1.94442	-0.986306
Brain_Nucleus_accumbens_basal_ganglia	ENSG00000170606.14	HSPA4	chr5	133051962	133106449	+	6836	1.05957	813.347	143.949	5.17714e-10	chr5_133071366_C_T_b38	19404	chr5	133071366	C	T	1	rs6596100	81	89	0.220297	1	4.31104e-11	0.328143	0.0463929	9.999e-05	1.7106e-07	7.15257e-07	6.49509e-05	0.207093	0.149569	0.255012
Brain_Nucleus_accumbens_basal_ganglia	ENSG00000204371.11	EHMT2	chr6	31879759	31897684	-	26877	1.05082	582.027	131.641	1.8028e-09	chr6_31954477_A_C_b38	56793	chr6	31954477	A	C	1	rs630379	84	98	0.242574	-1	2.47959e-11	0.280012	0.0390358	9.999e-05	5.09746e-07	1.98416e-06	8.81568e-05	0.188427	0.148705	0.235761
Brain_Nucleus_accumbens_basal_ganglia	ENSG00000123545.5	NDUFAF4	chr6	96889313	96897881	-	7110	1.0452	531.266	144.724	4.06877e-17	chr6_96822328_C_G_b38	-75553	chr6	96822328	C	G	1	rs75638678	46	49	0.121287	1	5.56812e-19	0.415657	0.0410455	9.999e-05	5.1119e-15	5.49327e-14	9.47679e-05	0.372253	0.321482	0.43256
Brain_Nucleus_accumbens_basal_ganglia	ENSG00000146477.5	SLC22A3	chr6	160348268	160452581	+	8277	1.05931	769.751	142.509	1.71495e-07	chr6_160437156_G_A_b38	88888	chr6	160437156	G	A	1	rs2292334	116	153	0.378713	1	2.47457e-08	0.323968	0.0552542	0.00019998	7.57053e-05	0.00020663	6.85702e-05	0.429207	0.273087	0.510128
Brain_Nucleus_accumbens_basal_ganglia	ENSG00000257335.8	MGAM	chr7	141907813	142106747	+	6643	1.03373	717.877	146.37	2.28431e-15	chr7_141742852_A_G_b38	-164961	chr7	141742852	A	G	1	rs2013816	148	200	0.49505	1	7.51901e-17	-0.589423	0.0631357	9.999e-05	6.47096e-13	5.46063e-12	6.74385e-05	-1.28973	-1.59424	-1.08082
Brain_Nucleus_accumbens_basal_ganglia	ENSG00000136997.16	MYC	chr8	127735434	127741434	+	8376	1.0359	1270.65	149.36	1.33132e-07	chr8_127843754_GT_G_b38	108320	chr8	127843754	GT	G	1	rs74206865	134	171	0.423267	-1	3.9327e-08	-0.316067	0.0547819	0.00029997	0.000121931	0.000320761	3.83875e-05	-0.557233	-0.711372	-0.399088
Brain_Nucleus_accumbens_basal_ganglia	ENSG00000174775.16	HRAS	chr11	532242	537287	-	6400	1.04866	768.026	143.395	2.98601e-17	chr11_526356_G_A_b38	-10931	chr11	526356	G	A	1	rs61877777	42	47	0.116337	1	2.70503e-19	-0.40609	0.0396498	9.999e-05	4.86998e-15	5.23908e-14	6.63256e-05	-0.330233	-0.381078	-0.278633
Brain_Nucleus_accumbens_basal_ganglia	ENSG00000187486.5	KCNJ11	chr11	17385859	17389331	-	6662	1.03256	721.989	147.113	1.19281e-21	chr11_17424198_C_A_b38	34867	chr11	17424198	C	A	1	rs2237987	54	60	0.148515	1	1.10105e-23	0.705116	0.0595772	9.999e-05	2.19159e-19	3.70203e-18	6.6784e-05	0.889074	0.755691	1.02641
Brain_Nucleus_accumbens_basal_ganglia	ENSG00000006071.12	ABCC8	chr11	17392885	17476845	-	6843	1.03567	734.56	146.069	1.66883e-14	chr11_17476247_C_G_b38	-598	chr11	17476247	C	G	1	rs985136	147	198	0.490099	1	6.32791e-16	0.514785	0.0572822	9.999e-05	4.92641e-12	3.71929e-11	6.6349e-05	0.582739	0.463306	0.682561
Brain_Nucleus_accumbens_basal_ganglia	ENSG00000110717.12	NDUFS8	chr11	68030627	68036644	+	7034	1.0616	550.787	140.548	5.42352e-09	chr11_68029289_A_G_b38	-1338	chr11	68029289	A	G	1	rs3115547	80	87	0.215347	1	3.74087e-10	-0.250378	0.0375095	9.999e-05	1.32774e-06	4.85407e-06	9.65543e-05	-0.179691	-0.241786	-0.132569
Brain_Nucleus_accumbens_basal_ganglia	ENSG00000069431.11	ABCC9	chr12	21797401	21942529	-	7905	1.02958	743.597	145.468	4.31422e-11	chr12_21884168_T_C_b38	-58361	chr12	21884168	T	C	1	rs1283808	124	166	0.410891	-1	3.43648e-12	-0.336472	0.0447105	9.999e-05	1.90125e-08	9.15556e-08	6.4177e-05	-0.469268	-0.560637	-0.342465
Brain_Nucleus_accumbens_basal_ganglia	ENSG00000137806.8	NDUFAF1	chr15	41387349	41402519	-	6332	1.05011	469.051	141.75	3.40058e-13	chr15_41468419_A_G_b38	65900	chr15	41468419	A	G	1	rs111371454	107	127	0.314356	1	7.15913e-15	-0.481741	0.0561201	9.999e-05	5.03834e-11	3.42448e-10	0.000109128	-0.26026	-0.312565	-0.214582
Brain_Nucleus_accumbens_basal_ganglia	ENSG00000167720.12	SRR	chr17	2303383	2325260	+	8461	1.04604	1354.71	147.414	4.54475e-16	chr17_2304032_G_A_b38	649	chr17	2304032	G	A	1	rs3744270	113	131	0.324257	1	1.64103e-17	-0.455565	0.0475392	9.999e-05	1.65354e-13	1.48676e-12	3.72722e-05	-0.321831	-0.382971	-0.254831
Brain_Nucleus_accumbens_basal_ganglia	ENSG00000142494.13	SLC47A1	chr17	19495385	19579034	+	4687	1.06076	441.515	142.762	1.31568e-10	chr17_19503078_C_T_b38	7693	chr17	19503078	C	T	1	rs8078268	92	106	0.262376	1	7.59577e-12	-0.572504	0.0775216	9.999e-05	2.05497e-08	9.84231e-08	0.000120115	-0.629563	-0.839455	-0.430525
Brain_Nucleus_accumbens_basal_ganglia	ENSG00000171298.12	GAA	chr17	80101556	80119879	+	9997	1.03975	1695.04	147.271	1.41536e-12	chr17_80101429_C_T_b38	-127	chr17	80101429	C	T	1	rs2304850	81	90	0.222772	1	1.09107e-13	-0.368588	0.045371	9.999e-05	1.07123e-09	6.08445e-09	2.91588e-05	-0.22385	-0.267212	-0.172754
Brain_Nucleus_accumbens_basal_ganglia	ENSG00000170906.15	NDUFA3	chr19	54102728	54109257	+	12746	1.02342	2597.35	151.717	3.12995e-08	chr19_54100357_G_A_b38	-2371	chr19	54100357	G	A	1	rs56049745	48	53	0.131188	1	1.07111e-08	0.292428	0.0484927	9.999e-05	6.45484e-05	0.000178528	1.79827e-05	0.273755	0.214973	0.374238
Brain_Nucleus_accumbens_basal_ganglia	ENSG00000160194.17	NDUFV3	chr21	42879644	42913304	+	8344	1.05053	1173.57	145.61	1.12362e-07	chr21_42903610_C_T_b38	23966	chr21	42903610	C	T	1	rs4148974	21	22	0.0544554	1	2.17976e-08	-0.575984	0.0978112	9.999e-05	8.21146e-05	0.000222689	4.36804e-05	-0.270334	-0.379992	-0.158407
Brain_Nucleus_accumbens_basal_ganglia	ENSG00000100191.5	SLC5A4	chr22	32218476	32255341	-	8455	1.03026	779.015	145.056	3.15321e-12	chr22_32355072_C_CCGCCCCCG_b38	99731	chr22	32355072	C	CCGCCCCCG	2	rs1276807958	26	26	0.065	1	1.73358e-13	1.24496	0.154756	9.999e-05	1.33081e-09	7.46315e-09	6.14042e-05	2.20279	1.84629	2.50856
Brain_Nucleus_accumbens_basal_ganglia	ENSG00000184983.9	NDUFA6	chr22	42085525	42090930	-	7183	1.0523	459.27	139.25	3.15921e-20	chr22_42090076_G_A_b38	-854	chr22	42090076	G	A	1	rs1989202	23	23	0.0569307	1	2.79002e-23	0.921902	0.0788638	9.999e-05	1.86633e-18	2.829e-17	0.000112272	0.56794	0.514066	0.617414
Brain_Nucleus_accumbens_basal_ganglia	ENSG00000100197.20	CYP2D6	chr22	42126499	42130906	-	7271	1.07396	497.532	139.203	3.28335e-37	chr22_42138673_C_T_b38	7767	chr22	42138673	C	T	1	rs2743451	149	198	0.490099	-1	4.87016e-43	0.720643	0.0379595	9.999e-05	5.01234e-37	4.44124e-35	0.000111284	1.53788	1.41232	1.64777
Brain_Nucleus_accumbens_basal_ganglia	ENSG00000169083.16	AR	chrX	67544032	67730619	+	3880	1.06673	239.323	148.569	1.29873e-10	chrX_67585127_A_G_b38	41095	chrX	67585127	A	G	1	rs2361629	43	72	0.178218	-1	1.9134e-11	0.432227	0.0598661	9.999e-05	9.52213e-09	4.72606e-08	0.000225952	0.673809	0.556547	0.84796
Brain_Putamen_basal_ganglia	ENSG00000198793.12	MTOR	chr1	11106535	11262507	-	7857	1.02313	1159.73	120.237	6.90289e-08	chr1_11203976_CA_C_b38	-58531	chr1	11203976	CA	C	1	rs34085316	79	100	0.294118	-1	2.03222e-08	-0.327364	0.0547517	0.00019998	6.3726e-05	0.000221075	3.29243e-05	-0.13914	-0.163597	-0.103386
Brain_Putamen_basal_ganglia	ENSG00000168653.10	NDUFS5	chr1	39026318	39034636	+	6847	1.03373	873.084	118.409	7.07175e-13	chr1_38996470_CT_C_b38	-29848	chr1	38996470	CT	C	1	rs35363657	84	100	0.294118	1	5.37282e-14	-0.286088	0.0338976	9.999e-05	2.976e-10	2.51674e-09	4.54651e-05	-0.264559	-0.327321	-0.227027
Brain_Putamen_basal_ganglia	ENSG00000023228.13	NDUFS1	chr2	206114817	206159584	-	6870	1.03976	827.097	116.454	9.96027e-12	chr2_206094196_T_TAATTTATAG_b38	-65388	chr2	206094196	T	TAATTTATAG	1	rs113360810	124	165	0.485294	1	6.30861e-13	-0.324628	0.0406263	9.999e-05	3.86268e-09	2.76207e-08	4.90495e-05	-0.147724	-0.177747	-0.122281
Brain_Putamen_basal_ganglia	ENSG00000130414.11	NDUFA10	chr2	239892450	240025402	-	10077	1.03412	1588.2	119.476	8.91568e-09	chr2_239980495_T_C_b38	-44907	chr2	239980495	T	C	1	rs34849118	86	102	0.3	1	1.98446e-09	0.316461	0.0490401	9.999e-05	9.53242e-06	3.87415e-05	2.50295e-05	0.14347	0.108616	0.18883
Brain_Putamen_basal_ganglia	ENSG00000142330.19	CAPN10	chr2	240586716	240617705	+	9651	1.03582	1307.12	118.32	1.51334e-08	chr2_240586636_A_T_b38	-80	chr2	240586636	A	T	1	rs56352308	45	48	0.141176	1	2.95769e-09	-0.517205	0.0811553	9.999e-05	1.32134e-05	5.21409e-05	3.05995e-05	-0.242442	-0.306808	-0.160898
Brain_Putamen_basal_ganglia	ENSG00000204371.11	EHMT2	chr6	31879759	31897684	-	26877	1.05731	547.406	104.939	6.15411e-09	chr6_31954477_A_C_b38	56793	chr6	31954477	A	C	1	rs630379	79	92	0.270588	-1	9.65055e-11	0.30431	0.0431896	9.999e-05	1.59538e-06	7.42049e-06	7.88588e-05	0.186628	0.149356	0.223509
Brain_Putamen_basal_ganglia	ENSG00000123545.5	NDUFAF4	chr6	96889313	96897881	-	7110	1.04136	480.15	115.312	1.00934e-10	chr6_96822328_C_G_b38	-75553	chr6	96822328	C	G	1	rs75638678	44	46	0.135294	1	6.57361e-12	0.366994	0.0485714	9.999e-05	2.37162e-08	1.49479e-07	8.49751e-05	0.356993	0.290086	0.430495
Brain_Putamen_basal_ganglia	ENSG00000146477.5	SLC22A3	chr6	160348268	160452581	+	8277	1.02745	799.319	116.518	4.48458e-10	chr6_160437156_G_A_b38	88888	chr6	160437156	G	A	1	rs2292334	97	125	0.367647	1	4.44283e-11	0.411771	0.0572337	9.999e-05	2.35713e-07	1.26099e-06	4.85354e-05	0.513486	0.405837	0.639899
Brain_Putamen_basal_ganglia	ENSG00000257335.8	MGAM	chr7	141907813	142106747	+	6643	1.02822	703.761	117.698	2.02562e-09	chr7_141772778_T_A_b38	-135035	chr7	141772778	T	A	1	rs11766136	113	147	0.49	1	2.92838e-10	-0.583932	0.0854839	9.999e-05	9.63169e-07	4.67138e-06	5.52812e-05	-1.40289	-1.70096	-1.12298
Brain_Putamen_basal_ganglia	ENSG00000174775.16	HRAS	chr11	532242	537287	-	6400	1.03607	785.602	116.556	2.50865e-12	chr11_521462_C_T_b38	-15825	chr11	521462	C	T	1	rs61877775	37	41	0.120588	1	1.39026e-13	-0.403629	0.0488228	9.999e-05	9.4163e-10	7.39659e-09	5.09579e-05	-0.288687	-0.372958	-0.214896
Brain_Putamen_basal_ganglia	ENSG00000187486.5	KCNJ11	chr11	17385859	17389331	-	6662	1.03745	698.141	117.444	1.04649e-11	chr11_17424198_C_A_b38	34867	chr11	17424198	C	A	1	rs2237987	45	50	0.147059	1	8.32861e-13	0.544005	0.0685191	9.999e-05	3.56383e-09	2.56113e-08	5.76279e-05	0.583759	0.46574	0.683069
Brain_Putamen_basal_ganglia	ENSG00000006071.12	ABCC8	chr11	17392885	17476845	-	6843	1.04439	704.914	116.619	3.26982e-15	chr11_17476247_C_G_b38	-598	chr11	17476247	C	G	1	rs985136	122	164	0.482353	1	8.66986e-17	0.463631	0.048365	9.999e-05	6.8804e-13	8.26855e-12	5.85123e-05	0.574311	0.45296	0.659904
Brain_Putamen_basal_ganglia	ENSG00000168398.6	BDKRB2	chr14	96204679	96244166	+	8698	1.04389	1297.98	119.336	5.2089e-10	chr14_96140396_C_T_b38	-64283	chr14	96140396	C	T	1	rs60634508	57	68	0.2	1	8.84901e-11	-0.502757	0.071186	9.999e-05	3.55545e-07	1.83842e-06	3.17214e-05	-1.50889	-2.11774	-1.1173
Brain_Putamen_basal_ganglia	ENSG00000137806.8	NDUFAF1	chr15	41387349	41402519	-	6332	1.02982	438.556	113.991	1.19047e-10	chr15_41337304_A_C_b38	-65215	chr15	41337304	A	C	1	rs7180418	93	110	0.323529	1	5.9961e-12	-0.463285	0.0611761	9.999e-05	3.12614e-08	1.93276e-07	8.92293e-05	-0.247939	-0.298078	-0.195314
Brain_Putamen_basal_ganglia	ENSG00000167720.12	SRR	chr17	2303383	2325260	+	8461	1.04802	1332.3	118.93	1.74972e-16	chr17_2254523_C_T_b38	-48860	chr17	2254523	C	T	1	rs112258894	108	127	0.373529	1	7.02796e-18	-0.576222	0.0574646	9.999e-05	5.64724e-14	7.83646e-13	3.13615e-05	-0.458108	-0.564161	-0.369638
Brain_Putamen_basal_ganglia	ENSG00000142494.13	SLC47A1	chr17	19495385	19579034	+	4687	1.08093	440.776	115.108	5.76952e-12	chr17_19540132_G_C_b38	44747	chr17	19540132	G	C	1	rs2453584	107	130	0.382353	1	2.5017e-13	0.719781	0.0882074	9.999e-05	4.94404e-10	4.04818e-09	0.000106174	0.831869	0.663591	0.994846
Brain_Putamen_basal_ganglia	ENSG00000171298.12	GAA	chr17	80101556	80119879	+	9997	1.05764	1800.85	119.958	7.34469e-14	chr17_80101663_G_C_b38	107	chr17	80101663	G	C	1	rs2304849	65	77	0.226471	1	6.72114e-15	-0.595873	0.0676064	9.999e-05	3.47589e-11	3.35457e-10	2.39999e-05	-0.307028	-0.371038	-0.263539
Brain_Putamen_basal_ganglia	ENSG00000170906.15	NDUFA3	chr19	54102728	54109257	+	12746	1.03252	2396.99	120.212	8.70062e-11	chr19_54132915_A_G_b38	30187	chr19	54132915	A	G	1	rs62144171	49	56	0.164706	1	1.49945e-11	0.400864	0.0541658	9.999e-05	1.2469e-07	6.99843e-07	1.64881e-05	0.346119	0.295351	0.417551
Brain_Putamen_basal_ganglia	ENSG00000160194.17	NDUFV3	chr21	42879644	42913304	+	8344	1.04029	1177.06	118.181	5.19414e-08	chr21_42918300_G_A_b38	38656	chr21	42918300	G	A	1	rs2839606	124	168	0.494118	-1	1.12065e-08	0.360911	0.0591456	0.00019998	4.06364e-05	0.000145703	3.45323e-05	0.172704	0.138251	0.226543
Brain_Putamen_basal_ganglia	ENSG00000184983.9	NDUFA6	chr22	42085525	42090930	-	7183	1.04459	469.972	113.369	2.04439e-15	chr22_42090076_G_A_b38	-854	chr22	42090076	G	A	1	rs1989202	17	17	0.05	1	1.84316e-17	0.95638	0.097012	9.999e-05	2.74394e-13	3.47635e-12	8.78229e-05	0.520427	0.479921	0.561766
Brain_Putamen_basal_ganglia	ENSG00000100197.20	CYP2D6	chr22	42126499	42130906	-	7271	1.05436	496.805	113.217	1.44629e-28	chr22_42141587_G_A_b38	10681	chr22	42141587	G	A	1	rs1800754	128	169	0.497059	1	1.43765e-32	0.707101	0.0441326	9.999e-05	3.01566e-27	1.72144e-25	8.59984e-05	1.56891	1.41473	1.7281
Brain_Spinal_cord_cervical_c-1	ENSG00000130414.11	NDUFA10	chr2	239892450	240025402	-	10077	1.03884	1462.1	93.3461	2.98245e-08	chr2_239992909_G_A_b38	-32493	chr2	239992909	G	A	1	rs1465880	62	75	0.297619	1	8.10056e-09	0.360572	0.057298	9.999e-05	2.90302e-05	0.000194502	1.51655e-05	0.17225	0.13511	0.216033
Brain_Spinal_cord_cervical_c-1	ENSG00000180767.9	CHST13	chr3	126524283	126543291	+	9352	1.03576	739.837	91.7088	2.24904e-11	chr3_126515183_A_G_b38	-9100	chr3	126515183	A	G	1	rs10804576	85	108	0.428571	-1	2.19948e-12	0.722049	0.0903036	9.999e-05	8.63485e-09	1.16678e-07	2.95888e-05	2.26281	1.78145	2.78129
Brain_Spinal_cord_cervical_c-1	ENSG00000123545.5	NDUFAF4	chr6	96889313	96897881	-	7110	1.06067	489.291	91.4721	5.57007e-10	chr6_96887862_A_ATAGAG_b38	-10019	chr6	96887862	A	ATAGAG	1	rs146178235	33	37	0.154167	-1	7.08842e-11	-0.638349	0.0875671	9.999e-05	1.06059e-07	1.18279e-06	4.9525e-05	-0.472635	-0.570182	-0.34379
Brain_Spinal_cord_cervical_c-1	ENSG00000257335.8	MGAM	chr7	141907813	142106747	+	6643	1.05337	643.581	92.1428	2.39094e-09	chr7_141801947_C_G_b38	-105866	chr7	141801947	C	G	1	rs12703408	85	116	0.460317	-1	4.09222e-10	-0.618483	0.0892916	9.999e-05	7.35768e-07	6.86641e-06	3.65643e-05	-1.48292	-1.83295	-1.04307
Brain_Spinal_cord_cervical_c-1	ENSG00000174775.16	HRAS	chr11	532242	537287	-	6400	1.03	870.171	93.5631	7.05916e-11	chr11_545087_T_C_b38	7800	chr11	545087	T	C	1	rs35579818	72	90	0.357143	1	1.2456e-11	-0.324956	0.0425044	9.999e-05	3.68468e-08	4.44618e-07	2.45572e-05	-0.209559	-0.250728	-0.160354
Brain_Spinal_cord_cervical_c-1	ENSG00000089250.18	NOS1	chr12	117208142	117452170	-	7654	1.02637	1117.63	94.2338	2.42036e-08	chr12_117439202_A_G_b38	-12968	chr12	117439202	A	G	1	rs4767540	94	124	0.492063	1	7.61701e-09	-0.556876	0.0883059	9.999e-05	2.02663e-05	0.000141106	1.8829e-05	-0.893089	-1.17895	-0.622579
Brain_Spinal_cord_cervical_c-1	ENSG00000137806.8	NDUFAF1	chr15	41387349	41402519	-	6332	1.0372	407.869	88.9865	1.23407e-14	chr15_41387294_G_A_b38	-15225	chr15	41387294	G	A	1	rs28703570	51	62	0.246032	1	2.04884e-16	0.597846	0.0607735	9.999e-05	1.88155e-12	4.50477e-11	5.39924e-05	0.33857	0.294954	0.397804
Brain_Spinal_cord_cervical_c-1	ENSG00000167720.12	SRR	chr17	2303383	2325260	+	8461	1.02365	1369.04	94.6678	3.99652e-12	chr17_2304032_G_A_b38	649	chr17	2304032	G	A	1	rs3744270	71	84	0.333333	1	7.68276e-13	-0.637822	0.0777176	9.999e-05	3.45345e-09	4.97869e-08	1.51947e-05	-0.48073	-0.555289	-0.404232
Brain_Spinal_cord_cervical_c-1	ENSG00000171298.12	GAA	chr17	80101556	80119879	+	9997	1.01257	1821.46	95.6738	2.57023e-11	chr17_80101429_C_T_b38	-127	chr17	80101429	C	T	1	rs2304850	57	68	0.269841	1	7.21478e-12	-0.449146	0.0579095	9.999e-05	3.76647e-08	4.52226e-07	1.08891e-05	-0.37977	-0.459569	-0.297674
Brain_Spinal_cord_cervical_c-1	ENSG00000170906.15	NDUFA3	chr19	54102728	54109257	+	12746	1.04203	1985.5	92.3795	1.22817e-10	chr19_54108427_A_G_b38	5699	chr19	54108427	A	G	1	rs75622830	35	38	0.150794	1	1.68626e-11	0.636542	0.0839364	9.999e-05	1.26251e-07	1.38746e-06	1.13161e-05	0.543227	0.432793	0.653068
Brain_Spinal_cord_cervical_c-1	ENSG00000184983.9	NDUFA6	chr22	42085525	42090930	-	7183	1.05884	455.146	88.3553	3.32852e-13	chr22_41996087_G_A_b38	-94843	chr22	41996087	G	A	1	rs55758879	8	8	0.031746	1	6.88619e-15	1.37871	0.150779	9.999e-05	3.90282e-11	7.63274e-10	5.28517e-05	0.796621	0.683705	0.863345
Brain_Spinal_cord_cervical_c-1	ENSG00000100197.20	CYP2D6	chr22	42126499	42130906	-	7271	1.03842	468.527	88.9076	9.46688e-20	chr22_42144550_G_A_b38	13644	chr22	42144550	G	A	1	rs2743461	89	112	0.444444	-1	3.11393e-22	0.858924	0.0686979	9.999e-05	1.02677e-17	5.63168e-16	4.72415e-05	1.3708	1.18085	1.63124
Brain_Substantia_nigra	ENSG00000180767.9	CHST13	chr3	126524283	126543291	+	9352	1.05299	734.786	80.2043	1.9718e-08	chr3_126524121_G_C_b38	-162	chr3	126524121	G	C	1	rs1388096	70	90	0.39823	1	3.29726e-09	-0.748478	0.113926	9.999e-05	7.84318e-06	9.37642e-05	2.20407e-05	-1.9568	-2.46368	-1.52536
Brain_Substantia_nigra	ENSG00000257335.8	MGAM	chr7	141907813	142106747	+	6643	1.03183	688.897	81.96	5.68179e-10	chr7_141784523_CCTAACAGAAAGCTAT_C_b38	-123290	chr7	141784523	CCTAACAGAAAGCTAT	C	1	rs72111426	72	97	0.425439	-1	1.03833e-10	-0.6388	0.0872292	9.999e-05	2.41385e-07	4.08033e-06	2.13878e-05	-1.48752	-1.95361	-1.21993
Brain_Substantia_nigra	ENSG00000006071.12	ABCC8	chr11	17392885	17476845	-	6843	1.03464	717.109	81.8383	4.482e-13	chr11_17476247_C_G_b38	-598	chr11	17476247	C	G	1	rs985136	79	109	0.47807	1	4.28446e-14	0.570391	0.0635716	9.999e-05	1.48507e-10	4.67588e-09	2.08102e-05	0.715841	0.571913	0.860521
Brain_Substantia_nigra	ENSG00000167720.12	SRR	chr17	2303383	2325260	+	8461	1.03445	1283.91	81.5428	5.13068e-08	chr17_2148436_G_T_b38	-154947	chr17	2148436	G	T	1	rs12452074	72	88	0.385965	1	1.25747e-08	-0.541633	0.0863634	9.999e-05	4.6574e-05	0.000454494	1.16134e-05	-0.433142	-0.522415	-0.321899
Brain_Substantia_nigra	ENSG00000184983.9	NDUFA6	chr22	42085525	42090930	-	7183	1.01702	505.137	80.2738	9.54625e-10	chr22_42130522_G_A_b38	39592	chr22	42130522	G	A	1	rs29001678	15	15	0.0657895	1	1.17447e-10	0.788844	0.108109	9.999e-05	3.7374e-07	6.05147e-06	2.72417e-05	0.518674	0.449864	0.564329
Brain_Substantia_nigra	ENSG00000100197.20	CYP2D6	chr22	42126499	42130906	-	7271	1.04819	429.19	76.7625	5.33791e-17	chr22_42144550_G_A_b38	13644	chr22	42144550	G	A	1	rs2743461	82	102	0.447368	-1	1.78169e-19	0.701983	0.0605619	9.999e-05	4.93812e-15	3.27537e-13	3.69437e-05	1.45925	1.29507	1.624
Breast_Mammary_Tissue	ENSG00000168653.10	NDUFS5	chr1	39026318	39034636	+	6847	1.02584	1016.41	297.173	5.3151e-58	chr1_39028109_C_T_b38	1791	chr1	39028109	C	T	1	rs76289224	201	232	0.292929	1	1.85233e-63	-0.429642	0.0202285	9.999e-05	2.11592e-56	9.60233e-55	5.94234e-05	-0.445518	-0.502936	-0.401126
Breast_Mammary_Tissue	ENSG00000085832.16	EPS15	chr1	51354263	51519328	-	4443	1.05646	240.467	277.243	2.53448e-38	chr1_51370670_G_A_b38	-148658	chr1	51370670	G	A	1	rs148648502	46	47	0.0593434	1	9.11149e-45	0.885005	0.0537386	9.999e-05	6.10719e-38	1.145e-36	0.00027691	0.505761	0.449639	0.579522
Breast_Mammary_Tissue	ENSG00000162692.10	VCAM1	chr1	100719742	100739045	+	7352	1.02883	625.253	286.285	1.52639e-07	chr1_100696469_TG_T_b38	-23273	chr1	100696469	TG	T	1	rs71590294	247	308	0.388889	1	2.11611e-08	0.231695	0.0403341	9.999e-05	7.21756e-05	0.000129172	9.7544e-05	0.555886	0.453362	0.684236
Breast_Mammary_Tissue	ENSG00000243480.7	AMY2A	chr1	103616811	103625780	+	8055	1.03888	440.631	278.326	6.0358e-08	chr1_103535612_G_A_b38	-81199	chr1	103535612	G	A	1	rs13376070	74	75	0.094697	1	4.51381e-09	0.706363	0.117198	9.999e-05	1.73613e-05	3.40762e-05	0.000142977	2.06353	1.36379	2.47869
Breast_Mammary_Tissue	ENSG00000134184.12	GSTM1	chr1	109687814	109693745	+	6623	1.04168	958.764	289.659	1.82574e-13	chr1_109675302_G_A_b38	-12512	chr1	109675302	G	A	1	rs611951	103	112	0.141414	-1	5.72661e-15	-0.752047	0.0917516	9.999e-05	6.73847e-11	2.42659e-10	6.63047e-05	-4.57009	-5.23026	-3.90141
Breast_Mammary_Tissue	ENSG00000130414.11	NDUFA10	chr2	239892450	240025402	-	10077	1.02817	1632.06	294.323	2.02783e-41	chr2_239960810_G_A_b38	-64592	chr2	239960810	G	A	1	rs8369	96	105	0.132576	1	1.07391e-45	-0.69179	0.0414107	9.999e-05	2.87527e-39	5.85897e-38	3.72911e-05	-0.347981	-0.402008	-0.315482
Breast_Mammary_Tissue	ENSG00000142330.19	CAPN10	chr2	240586716	240617705	+	9651	1.05597	1321.93	288.72	1.48674e-12	chr2_240642034_C_G_b38	55318	chr2	240642034	C	G	1	rs1864879	182	219	0.276515	-1	5.5027e-14	-0.244786	0.0311273	9.999e-05	6.24372e-10	2.05476e-09	5.03054e-05	-0.14593	-0.179085	-0.119316
Breast_Mammary_Tissue	ENSG00000157017.15	GHRL	chr3	10285747	10291451	-	7468	1.04188	1231.59	292.875	4.90371e-08	chr3_10296572_G_A_b38	5121	chr3	10296572	G	A	1	rs151731	225	279	0.352273	1	8.63968e-09	-0.305627	0.0517175	0.00019998	3.94788e-05	7.37425e-05	5.16502e-05	-0.566021	-0.686827	-0.412359
Breast_Mammary_Tissue	ENSG00000180767.9	CHST13	chr3	126524283	126543291	+	9352	1.02718	808.727	288.243	4.70649e-24	chr3_126530422_G_A_b38	6139	chr3	126530422	G	A	1	rs744233	203	230	0.290404	1	5.38078e-27	-0.614348	0.0520681	9.999e-05	1.04814e-21	8.44428e-21	7.50107e-05	-1.99576	-2.35288	-1.52742
Breast_Mammary_Tissue	ENSG00000109390.11	NDUFC1	chr4	139289917	139302551	-	6947	1.02338	1038.42	292.365	9.62413e-10	chr4_139494003_G_C_b38	191452	chr4	139494003	G	C	1	rs11730829	265	358	0.45202	-1	1.05895e-10	-0.164075	0.0245773	9.999e-05	7.16326e-07	1.68816e-06	5.76963e-05	-0.091138	-0.121108	-0.071302
Breast_Mammary_Tissue	ENSG00000133710.15	SPINK5	chr5	148025683	148137289	+	7805	1.03368	867.451	290.248	1.34973e-25	chr5_148035779_A_G_b38	10096	chr5	148035779	A	G	1	rs10463396	267	350	0.441919	-1	1.4972e-28	-0.694719	0.056822	9.999e-05	2.10574e-23	1.87136e-22	7.14258e-05	-1.67729	-1.89204	-1.47485
Breast_Mammary_Tissue	ENSG00000123545.5	NDUFAF4	chr6	96889313	96897881	-	7110	1.02798	574.984	289.229	1.78201e-13	chr6_96815489_A_T_b38	-82392	chr6	96815489	A	T	1	rs6568611	89	91	0.114899	-1	5.32139e-15	-0.276726	0.0337175	9.999e-05	5.3189e-11	1.93962e-10	0.000105778	-0.344616	-0.405271	-0.289243
Breast_Mammary_Tissue	ENSG00000165264.10	NDUFB6	chr9	32553011	32573184	-	8951	1.03797	796.596	285.393	3.2877e-13	chr9_32573149_C_G_b38	-35	chr9	32573149	C	G	1	rs631678	9	9	0.0113636	1	7.04183e-15	0.866982	0.106163	9.999e-05	1.11477e-10	3.93571e-10	7.88604e-05	0.688555	0.578143	0.905759
Breast_Mammary_Tissue	ENSG00000196730.12	DAPK1	chr9	87497228	87708633	+	8691	1.04243	1037.63	286.778	4.62517e-12	chr9_87574831_G_A_b38	77603	chr9	87574831	G	A	1	rs10117621	73	77	0.0972222	1	1.6407e-13	0.458785	0.0595812	9.999e-05	2.09001e-09	6.52064e-09	6.1412e-05	0.501813	0.397976	0.649546
Breast_Mammary_Tissue	ENSG00000138207.13	RBP4	chr10	93591687	93601744	-	7289	1.02521	783.681	290.551	2.4337e-07	chr10_93599989_G_C_b38	-1755	chr10	93599989	G	C	1	rs115984006	59	63	0.0795455	1	4.52263e-08	-0.191183	0.0341309	0.00019998	0.000152007	0.000257688	7.69104e-05	-0.888945	-1.26654	-0.558654
Breast_Mammary_Tissue	ENSG00000174775.16	HRAS	chr11	532242	537287	-	6400	1.06349	720.311	279.281	3.05827e-10	chr11_528575_A_G_b38	-8712	chr11	528575	A	G	1	rs7931091	176	206	0.260101	1	1.02535e-11	-0.22936	0.0324994	9.999e-05	8.09402e-08	2.13498e-07	9.44923e-05	-0.160233	-0.193265	-0.123589
Breast_Mammary_Tissue	ENSG00000006071.12	ABCC8	chr11	17392885	17476845	-	6843	1.0451	783.713	289.691	9.16709e-18	chr11_17476247_C_G_b38	-598	chr11	17476247	C	G	1	rs985136	282	387	0.488636	-1	8.47922e-20	0.28488	0.0292898	9.999e-05	1.62144e-15	8.52263e-15	8.20005e-05	1.14537	0.912572	1.29309
Breast_Mammary_Tissue	ENSG00000167792.11	NDUFV1	chr11	67606852	67612535	+	6269	1.05952	508.761	276.384	1.49603e-11	chr11_67618840_C_T_b38	11988	chr11	67618840	C	T	1	rs11227862	275	349	0.440657	1	2.30125e-13	0.204206	0.0266973	9.999e-05	2.43704e-09	7.54268e-09	0.000132149	0.098354	0.080099	0.120193
Breast_Mammary_Tissue	ENSG00000110092.3	CCND1	chr11	69641087	69654474	+	8325	1.04956	1236.7	293.002	1.28622e-07	chr11_69320907_C_G_b38	-320180	chr11	69320907	C	G	1	rs28599796	217	259	0.32702	1	2.53708e-08	-0.221146	0.0387262	9.999e-05	0.000100897	0.000176533	5.27036e-05	-0.452264	-0.648081	-0.329443
Breast_Mammary_Tissue	ENSG00000183648.9	NDUFB1	chr14	92116122	92121917	-	8455	1.03086	1142.79	292.333	2.58038e-13	chr14_92114776_GT_G_b38	-7141	chr14	92114776	GT	G	1	rs35937758	208	244	0.308081	1	1.1181e-14	-0.168098	0.0207551	9.999e-05	1.47819e-10	5.16096e-10	5.37244e-05	-0.150408	-0.188307	-0.120922
Breast_Mammary_Tissue	ENSG00000168398.6	BDKRB2	chr14	96204679	96244166	+	8698	1.04146	1473.76	298.462	1.52308e-07	chr14_96231074_C_G_b38	26395	chr14	96231074	C	G	1	rs76816040	48	48	0.0606061	1	4.08869e-08	0.455915	0.0811148	9.999e-05	0.000155592	0.0002635	4.31055e-05	0.803717	0.634659	1.01644
Breast_Mammary_Tissue	ENSG00000137806.8	NDUFAF1	chr15	41387349	41402519	-	6332	1.04031	496.592	280.777	1.22424e-09	chr15_41402441_G_A_b38	-78	chr15	41402441	G	A	1	rs146883891	31	33	0.0416667	1	5.7936e-11	0.493364	0.0728119	9.999e-05	3.35487e-07	8.19357e-07	0.000127449	0.401125	0.316806	0.587011
Breast_Mammary_Tissue	ENSG00000167720.12	SRR	chr17	2303383	2325260	+	8461	1.04797	1578.22	296.886	5.10079e-56	chr17_2304032_G_A_b38	649	chr17	2304032	G	A	1	rs3744270	200	237	0.299242	1	2.42204e-61	-0.787345	0.0380456	9.999e-05	2.49948e-55	1.07741e-53	4.10927e-05	-0.694604	-0.775064	-0.637504
Breast_Mammary_Tissue	ENSG00000171298.12	GAA	chr17	80101556	80119879	+	9997	1.05062	1782.34	294.323	5.88388e-38	chr17_80101663_G_C_b38	107	chr17	80101663	G	C	1	rs2304849	155	172	0.217172	1	7.32397e-42	-0.520871	0.0331225	9.999e-05	1.95371e-36	3.40942e-35	3.66917e-05	-0.50053	-0.571532	-0.436958
Breast_Mammary_Tissue	ENSG00000174886.12	NDUFA11	chr19	5891276	5904006	-	8886	1.02291	1605.2	296.361	1.55977e-13	chr19_5895347_C_T_b38	-8659	chr19	5895347	C	T	1	rs72989070	117	123	0.155303	1	9.71847e-15	-0.227135	0.0279737	9.999e-05	1.49399e-10	5.21251e-10	3.72672e-05	-0.151267	-0.206507	-0.123313
Breast_Mammary_Tissue	ENSG00000105329.9	TGFB1	chr19	41301705	41353911	-	6467	1.04318	828.865	287.638	7.19882e-10	chr19_41319286_C_T_b38	-34625	chr19	41319286	C	T	1	rs73045269	92	103	0.130051	1	5.36802e-11	0.280631	0.0413395	9.999e-05	3.15368e-07	7.72653e-07	7.70625e-05	0.283794	0.207768	0.347287
Breast_Mammary_Tissue	ENSG00000171051.8	FPR1	chr19	51745172	51804110	-	10609	1.04015	1620.09	290.519	5.4891e-11	chr19_51755288_C_T_b38	-48822	chr19	51755288	C	T	1	rs4802861	225	267	0.337121	-1	3.74343e-12	0.238498	0.0330441	9.999e-05	4.55382e-08	1.23981e-07	3.90485e-05	0.749733	0.488139	0.964034
Breast_Mammary_Tissue	ENSG00000170906.15	NDUFA3	chr19	54102728	54109257	+	12746	1.04674	2264.38	291.936	1.85971e-20	chr19_54108427_A_G_b38	5699	chr19	54108427	A	G	1	rs75622830	88	93	0.117424	1	1.1612e-22	0.384848	0.036398	9.999e-05	7.08253e-18	4.48456e-17	2.85299e-05	0.368497	0.32152	0.426513
Breast_Mammary_Tissue	ENSG00000160194.17	NDUFV3	chr21	42879644	42913304	+	8344	1.04776	1334.57	293.941	7.23485e-41	chr21_42903610_C_T_b38	23966	chr21	42903610	C	T	1	rs4148974	45	48	0.0606061	1	3.85646e-45	-0.847491	0.0511647	9.999e-05	1.61412e-39	3.34314e-38	4.85624e-05	-0.706393	-0.811491	-0.590882
Breast_Mammary_Tissue	ENSG00000100191.5	SLC5A4	chr22	32218476	32255341	-	8455	1.05348	817.709	284.804	7.81862e-18	chr22_32355072_C_CCGCCCCCG_b38	99731	chr22	32355072	C	CCGCCCCCG	2	rs1276807958	47	48	0.0607595	1	3.43727e-20	0.978697	0.0994165	9.999e-05	1.0873e-15	5.78136e-15	8.06932e-05	1.50049	1.23935	1.70274
Breast_Mammary_Tissue	ENSG00000184983.9	NDUFA6	chr22	42085525	42090930	-	7183	1.0456	535.856	279.026	2.00135e-39	chr22_42090076_G_A_b38	-854	chr22	42090076	G	A	1	rs1989202	25	26	0.0328283	1	8.86004e-46	0.846777	0.0506238	9.999e-05	2.40627e-38	4.63989e-37	0.000120116	0.907374	0.853087	0.971562
Breast_Mammary_Tissue	ENSG00000100197.20	CYP2D6	chr22	42126499	42130906	-	7271	1.04728	594.799	280.188	1.56597e-20	chr22_42142093_C_T_b38	11187	chr22	42142093	C	T	1	rs3021083	271	350	0.441919	-1	1.24181e-23	0.488414	0.0450023	9.999e-05	1.42878e-18	9.41321e-18	0.00010879	0.908211	0.737761	1.05681
Breast_Mammary_Tissue	ENSG00000147123.10	NDUFB11	chrX	47142216	47144868	-	3948	1.0527	465.804	289.102	2.977e-08	chrX_47138916_C_T_b38	-5952	chrX	47138916	C	T	1	rs5905590	169	279	0.352273	-1	3.94586e-09	0.100672	0.0166367	9.999e-05	7.51455e-06	1.54309e-05	0.000141302	0.08415	0.060344	0.109457
Breast_Mammary_Tissue	ENSG00000072506.12	HSD17B10	chrX	53431258	53434373	-	2292	1.04718	355.544	297.395	1.71155e-08	chrX_53434412_G_C_b38	39	chrX	53434412	G	C	1	rs1264014	219	356	0.449495	-1	3.54199e-09	-0.10395	0.0171236	9.999e-05	3.38274e-06	7.29228e-06	0.000181929	-0.095833	-0.117185	-0.07278
Cells_Cultured_fibroblasts	ENSG00000162551.13	ALPL	chr1	21509372	21578412	+	7957	1.03735	899.38	364.45	2.14382e-17	chr1_21545511_G_A_b38	36139	chr1	21545511	G	A	1	rs6696066	324	419	0.433747	1	1.65538e-19	-0.324759	0.0341656	9.999e-05	5.83318e-15	7.32925e-15	0.000208945	-1.55548	-1.76798	-1.29776
Cells_Cultured_fibroblasts	ENSG00000168653.10	NDUFS5	chr1	39026318	39034636	+	6847	1.02103	953.804	372.164	2.715e-127	chr1_39031147_G_A_b38	4829	chr1	39031147	G	A	1	rs10888639	237	279	0.28882	1	4.67463e-141	-0.606538	0.0154955	9.999e-05	6.4573e-127	6.47524e-125	0.000189706	-0.567134	-0.597972	-0.54327
Cells_Cultured_fibroblasts	ENSG00000117394.20	SLC2A1	chr1	42925375	42959048	-	6088	1.03885	547.217	359.701	4.37102e-24	chr1_42943749_C_T_b38	-15299	chr1	42943749	C	T	1	rs35022307	154	170	0.175983	1	2.03897e-27	-0.235428	0.0201625	9.999e-05	3.71851e-22	6.97523e-22	0.000344565	-0.37306	-0.425152	-0.333169
Cells_Cultured_fibroblasts	ENSG00000085832.16	EPS15	chr1	51354263	51519328	-	4443	1.05556	253.097	353.641	1.34025e-07	chr1_51450243_G_C_b38	-69085	chr1	51450243	G	C	1	rs35380971	261	308	0.318841	1	1.2035e-08	0.148124	0.025465	9.999e-05	1.86873e-05	1.12745e-05	0.000773387	0.068151	0.051642	0.087879
Cells_Cultured_fibroblasts	ENSG00000162692.10	VCAM1	chr1	100719742	100739045	+	7352	1.02115	631.287	364.37	5.09594e-29	chr1_100725310_A_C_b38	5568	chr1	100725310	A	C	1	rs3917010	165	178	0.184265	1	1.12966e-32	-0.64404	0.0495001	9.999e-05	9.21167e-27	2.17454e-26	0.00028669	-4.01077	-4.50359	-3.37793
Cells_Cultured_fibroblasts	ENSG00000134184.12	GSTM1	chr1	109687814	109693745	+	6623	1.05242	1075.36	371.529	4.12322e-24	chr1_109675302_G_A_b38	-12512	chr1	109675302	G	A	1	rs611951	138	153	0.158385	-1	1.26684e-26	-0.875217	0.0763113	9.999e-05	3.71429e-22	6.97003e-22	0.000180821	-5.0067	-5.56225	-4.44469
Cells_Cultured_fibroblasts	ENSG00000131791.7	PRKAB2	chr1	147155106	147172550	-	6380	1.0357	726.661	368.262	7.25676e-13	chr1_147164261_C_T_b38	-8289	chr1	147164261	C	T	1	rs6689155	353	469	0.485507	1	2.99883e-14	-0.16382	0.0207976	9.999e-05	2.42181e-10	2.23399e-10	0.000257625	-0.103429	-0.131493	-0.082903
Cells_Cultured_fibroblasts	ENSG00000131781.12	FMO5	chr1	147175351	147243050	-	6443	1.05579	662.585	360.145	2.12041e-13	chr1_147226096_A_T_b38	-16954	chr1	147226096	A	T	1	rs10900327	351	461	0.477226	-1	3.78306e-15	0.160501	0.0196435	9.999e-05	3.86703e-11	3.78319e-11	0.000295664	0.270672	0.206587	0.318932
Cells_Cultured_fibroblasts	ENSG00000158864.12	NDUFS2	chr1	161197104	161214395	+	7456	1.04024	871.347	367.788	2.11923e-11	chr1_161214307_A_G_b38	17203	chr1	161214307	A	G	1	rs1136224	133	156	0.161491	1	1.26737e-12	0.181927	0.0248381	9.999e-05	8.86287e-09	7.2811e-09	0.000217095	0.101995	0.085246	0.120045
Cells_Cultured_fibroblasts	ENSG00000115159.15	GPD2	chr2	156435290	156613735	+	5908	1.03919	519.611	358.461	6.88054e-27	chr2_156437479_A_G_b38	2189	chr2	156437479	A	G	1	rs298305	312	390	0.403727	1	9.86094e-31	0.305082	0.0243568	9.999e-05	4.23674e-25	9.22336e-25	0.000363149	0.225062	0.200197	0.257478
Cells_Cultured_fibroblasts	ENSG00000023228.13	NDUFS1	chr2	206114817	206159584	-	6870	1.03434	898.548	363.734	1.29484e-68	chr2_206108581_C_T_b38	-51003	chr2	206108581	C	T	1	rs929646	349	474	0.490683	1	1.14846e-77	-0.355074	0.0151804	9.999e-05	6.74945e-68	7.45123e-67	0.000207699	-0.256302	-0.274089	-0.244935
Cells_Cultured_fibroblasts	ENSG00000169047.5	IRS1	chr2	226731317	226799759	-	8539	1.03952	921.132	367.526	3.59749e-10	chr2_226456373_G_A_b38	-343386	chr2	226456373	G	A	1	rs10167111	225	260	0.269151	1	2.97757e-11	0.203946	0.0298434	9.999e-05	1.80624e-07	1.32673e-07	0.000205026	0.182507	0.141861	0.24671
Cells_Cultured_fibroblasts	ENSG00000135917.13	SLC19A3	chr2	227685210	227718012	-	8882	1.04232	934.136	366.699	1.04699e-25	chr2_227718030_G_A_b38	18	chr2	227718030	G	A	1	rs4972919	228	270	0.279503	-1	9.50871e-29	0.415495	0.0345647	9.999e-05	1.12437e-23	2.28449e-23	0.000203466	0.977587	0.861616	1.16643
Cells_Cultured_fibroblasts	ENSG00000130414.11	NDUFA10	chr2	239892450	240025402	-	10077	1.01811	1704.06	376.227	3.77172e-51	chr2_239959194_A_AT_b38	-66208	chr2	239959194	A	AT	1	rs138899326	137	145	0.150104	1	5.58199e-56	-0.619287	0.0335221	9.999e-05	8.91102e-49	5.13673e-48	0.000105461	-0.354803	-0.389656	-0.327905
Cells_Cultured_fibroblasts	ENSG00000142330.19	CAPN10	chr2	240586716	240617705	+	9651	1.05778	1315.8	364.793	5.25849e-13	chr2_240598644_T_C_b38	11928	chr2	240598644	T	C	1	rs55878652	134	144	0.149068	1	1.5759e-14	-0.307734	0.0386163	9.999e-05	1.99412e-10	1.84904e-10	0.000149559	-0.141175	-0.170883	-0.105047
Cells_Cultured_fibroblasts	ENSG00000157017.15	GHRL	chr3	10285747	10291451	-	7468	1.05622	1107.06	365.136	4.07145e-09	chr3_10273419_G_T_b38	-18032	chr3	10273419	G	T	1	rs164938	329	420	0.434783	1	3.96589e-10	0.353551	0.0551515	9.999e-05	2.20085e-06	1.45835e-06	0.00017714	0.637397	0.449723	0.770809
Cells_Cultured_fibroblasts	ENSG00000109320.11	NFKB1	chr4	102501329	102617302	+	6698	1.04554	500.915	353.53	5.92828e-11	chr4_102540570_A_AT_b38	39241	chr4	102540570	A	AT	1	rs3836561	236	270	0.279503	-1	1.49026e-12	-0.185367	0.0253929	9.999e-05	1.32207e-08	1.07167e-08	0.000382174	-0.081148	-0.100413	-0.0645
Cells_Cultured_fibroblasts	ENSG00000109390.11	NDUFC1	chr4	139289917	139302551	-	6947	1.04495	985.668	364.874	9.59922e-08	chr4_139498770_G_A_b38	196219	chr4	139498770	G	A	1	rs36109015	178	199	0.206004	1	1.38291e-08	0.132242	0.0228335	9.999e-05	6.11698e-05	3.48521e-05	0.000193984	0.086398	0.067717	0.106694
Cells_Cultured_fibroblasts	ENSG00000164258.11	NDUFS4	chr5	53560633	53683340	+	8298	1.04885	744.635	360.427	1.56585e-08	chr5_53586758_T_C_b38	26125	chr5	53586758	T	C	1	rs6864497	220	249	0.257764	1	1.42125e-09	-0.161152	0.0260187	0.00019998	6.55221e-06	4.13721e-06	0.000259035	-0.074251	-0.098702	-0.053997
Cells_Cultured_fibroblasts	ENSG00000164182.10	NDUFAF2	chr5	60945129	61153037	+	6093	1.04257	460.369	356.807	1.08804e-08	chr5_60991175_A_C_b38	46046	chr5	60991175	A	C	1	rs329621	282	343	0.355072	-1	7.716e-10	0.104885	0.0166532	9.999e-05	2.92447e-06	1.9123e-06	0.000413035	0.097393	0.071474	0.119752
Cells_Cultured_fibroblasts	ENSG00000170606.14	HSPA4	chr5	133051962	133106449	+	6836	1.06446	831.222	359.953	1.06741e-09	chr5_133091159_GTT_G_b38	39197	chr5	133091159	GTT	G	1	rs147133967	66	68	0.0703934	1	6.42349e-11	-0.174727	0.0260386	9.999e-05	3.51188e-07	2.50985e-07	0.000240254	-0.125035	-0.153783	-0.096471
Cells_Cultured_fibroblasts	ENSG00000131495.8	NDUFA2	chr5	140638740	140647769	-	4749	1.05069	417.023	355.839	6.76981e-11	chr5_140647631_T_C_b38	-138	chr5	140647631	T	C	1	rs778593	330	425	0.439959	1	2.0511e-12	-0.184271	0.0254121	9.999e-05	1.14403e-08	9.32953e-09	0.000464389	-0.08416	-0.100563	-0.068478
Cells_Cultured_fibroblasts	ENSG00000123545.5	NDUFAF4	chr6	96889313	96897881	-	7110	1.05353	521.831	357.493	8.79117e-08	chr6_96799992_G_A_b38	-97889	chr6	96799992	G	A	1	rs392242	118	123	0.127329	1	8.87221e-09	0.130545	0.0222328	0.00019998	2.62507e-05	1.55799e-05	0.000373507	0.177579	0.137588	0.215587
Cells_Cultured_fibroblasts	ENSG00000240583.11	AQP1	chr7	30911694	30925516	+	7383	1.05382	1033.18	367.485	8.50034e-09	chr7_30906751_T_C_b38	-4943	chr7	30906751	T	C	1	rs763422	344	478	0.494824	1	1.02889e-09	-0.22931	0.0366946	9.999e-05	4.58348e-06	2.93962e-06	0.000188793	-0.648789	-0.817279	-0.491684
Cells_Cultured_fibroblasts	ENSG00000174697.4	LEP	chr7	128241284	128257628	+	6647	1.0376	637.315	362.444	3.77249e-17	chr7_128251034_G_A_b38	9750	chr7	128251034	G	A	1	rs11760956	283	345	0.357143	1	2.50468e-19	-0.209046	0.0221147	9.999e-05	7.27494e-15	9.07169e-15	0.000295017	-1.37022	-1.62594	-1.13758
Cells_Cultured_fibroblasts	ENSG00000090266.12	NDUFB2	chr7	140696821	140706646	+	6210	1.04875	865.602	368.796	3.19929e-16	chr7_140681373_G_A_b38	-15448	chr7	140681373	G	A	1	rs2930319	167	205	0.212215	1	5.53821e-18	-0.203386	0.0224652	9.999e-05	6.621e-14	7.79005e-14	0.00022279	-0.125013	-0.143273	-0.105845
Cells_Cultured_fibroblasts	ENSG00000106617.13	PRKAG2	chr7	151556111	151877041	-	7561	1.02568	1259.81	368.756	5.10692e-13	chr7_151670898_G_A_b38	-206143	chr7	151670898	G	A	1	rs55914012	284	343	0.355072	-1	2.10603e-14	0.247324	0.0311979	9.999e-05	3.69489e-10	3.3645e-10	0.000145202	0.208508	0.177609	0.280985
Cells_Cultured_fibroblasts	ENSG00000254087.7	LYN	chr8	55879813	56014168	+	7973	1.05018	670.634	358.39	3.38534e-43	chr8_55880680_A_G_b38	867	chr8	55880680	A	G	1	rs6983130	181	197	0.203934	1	1.61493e-49	0.883541	0.0519717	9.999e-05	2.27622e-42	1.04444e-41	0.000288474	0.993074	0.903465	1.09727
Cells_Cultured_fibroblasts	ENSG00000196730.12	DAPK1	chr9	87497228	87708633	+	8691	1.02485	1153.99	370.238	8.64062e-08	chr9_87539698_A_T_b38	42470	chr9	87539698	A	T	1	rs11141871	345	444	0.459627	1	1.56478e-08	0.144575	0.0250601	9.999e-05	7.84587e-05	4.4092e-05	0.000158209	0.629312	0.48299	0.791064
Cells_Cultured_fibroblasts	ENSG00000119421.6	NDUFA8	chr9	122144058	122159819	-	7028	1.04361	834.844	365.438	3.60718e-10	chr9_122152334_C_T_b38	-7485	chr9	122152334	C	T	1	rs4679	325	446	0.461698	-1	2.62488e-11	0.100103	0.0146052	9.999e-05	1.53507e-07	1.13621e-07	0.00022833	0.058975	0.048334	0.07843
Cells_Cultured_fibroblasts	ENSG00000136877.14	FPGS	chr9	127794597	127814327	+	5342	1.03851	643.163	362.282	6.99114e-23	chr9_127741333_C_G_b38	-53264	chr9	127741333	C	G	1	rs539472	318	405	0.419255	-1	7.31764e-26	0.342565	0.0304016	9.999e-05	7.95343e-21	1.39361e-20	0.000292945	0.117215	0.09194	0.131429
Cells_Cultured_fibroblasts	ENSG00000138207.13	RBP4	chr10	93591687	93601744	-	7289	1.04309	817.817	368.03	1.51468e-13	chr10_93598661_G_T_b38	-3083	chr10	93598661	G	T	1	rs58621997	104	111	0.114907	1	5.08955e-15	0.523027	0.0643404	9.999e-05	4.54939e-11	4.43095e-11	0.000232808	1.08446	0.828917	1.31552
Cells_Cultured_fibroblasts	ENSG00000174775.16	HRAS	chr11	532242	537287	-	6400	1.0178	866.43	369.502	2.55976e-14	chr11_554047_G_A_b38	16760	chr11	554047	G	A	1	rs12793222	172	188	0.194617	1	7.92352e-16	-0.13644	0.0162665	9.999e-05	1.42243e-11	1.42966e-11	0.000207252	-0.132343	-0.154949	-0.104618
Cells_Cultured_fibroblasts	ENSG00000176697.18	BDNF	chr11	27654893	27722058	-	5202	1.05676	468.062	356.202	7.38423e-09	chr11_27934496_C_T_b38	212438	chr11	27934496	C	T	1	rs7105879	214	256	0.26501	-1	4.77054e-10	0.234723	0.0367933	9.999e-05	1.65104e-06	1.10701e-06	0.000419411	0.511998	0.381488	0.657523
Cells_Cultured_fibroblasts	ENSG00000213619.9	NDUFS3	chr11	47579016	47584562	+	5380	1.03678	207.651	346.271	3.16379e-11	chr11_47453637_G_T_b38	-125379	chr11	47453637	G	T	1	rs35184771	260	305	0.315735	1	4.13453e-13	-0.143625	0.0191682	9.999e-05	3.23346e-09	2.74832e-09	0.000903429	-0.070428	-0.08427	-0.050861
Cells_Cultured_fibroblasts	ENSG00000110717.12	NDUFS8	chr11	68030627	68036644	+	7034	1.04941	589.555	352.562	1.09604e-16	chr11_68029165_T_C_b38	-1462	chr11	68029165	T	C	1	rs15518	202	228	0.236025	1	2.76771e-19	0.157531	0.0166874	9.999e-05	1.40997e-14	1.72469e-14	0.000327571	0.137271	0.114904	0.162395
Cells_Cultured_fibroblasts	ENSG00000151366.12	NDUFC2	chr11	78068352	78080219	-	7061	1.06271	696.057	360.024	6.52349e-17	chr11_78057105_A_G_b38	-23114	chr11	78057105	A	G	1	rs6592763	130	145	0.150104	-1	3.56185e-19	0.225983	0.0240204	9.999e-05	6.43305e-15	8.05316e-15	0.000285796	0.129125	0.102532	0.148975
Cells_Cultured_fibroblasts	ENSG00000133703.11	KRAS	chr12	25205136	25250936	-	8603	1.02563	1226.15	378.869	3.93565e-14	chr12_25186470_T_C_b38	-64466	chr12	25186470	T	C	1	rs7955844	354	471	0.487578	1	2.8604e-15	-0.184282	0.0224465	9.999e-05	2.59606e-11	2.56955e-11	0.00014917	-0.092	-0.107188	-0.076684
Cells_Cultured_fibroblasts	ENSG00000173208.3	ABCD2	chr12	39550033	39619751	-	7423	1.0859	342.567	337.579	1.40589e-08	chr12_39582174_T_C_b38	-37577	chr12	39582174	T	C	1	rs80194462	94	97	0.100414	1	3.4901e-10	0.44286	0.0688534	9.999e-05	1.61889e-06	1.08633e-06	0.000610496	1.2148	1.01258	1.46527
Cells_Cultured_fibroblasts	ENSG00000181929.11	PRKAG1	chr12	49002274	49017402	-	6270	1.05292	517.893	353.409	9.42881e-09	chr12_49018926_G_A_b38	1524	chr12	49018926	G	A	1	rs2293446	285	350	0.362319	1	5.41887e-10	0.170856	0.0268725	9.999e-05	2.49762e-06	1.64683e-06	0.000375834	0.061337	0.043274	0.085171
Cells_Cultured_fibroblasts	ENSG00000184752.12	NDUFA12	chr12	94897055	95003770	-	8936	1.04935	1063.31	363.008	6.13682e-11	chr12_94996602_G_A_b38	-7168	chr12	94996602	G	A	1	rs61935749	286	343	0.355072	1	3.02037e-12	0.141568	0.019684	9.999e-05	2.82259e-08	2.22978e-08	0.000181615	0.091456	0.071671	0.116158
Cells_Cultured_fibroblasts	ENSG00000076555.15	ACACB	chr12	109116595	109268226	+	6984	1.04765	777.098	360.357	2.14895e-41	chr12_109154678_T_C_b38	38083	chr12	109154678	T	C	1	rs11610260	181	200	0.207039	1	3.41882e-47	-0.378971	0.0230164	9.999e-05	2.59233e-40	1.08314e-39	0.000247546	-0.713078	-0.847537	-0.620854
Cells_Cultured_fibroblasts	ENSG00000111199.10	TRPV4	chr12	109783085	109832735	-	5509	1.03812	528.714	359.469	4.07517e-12	chr12_109833413_C_T_b38	678	chr12	109833413	C	T	1	rs56079803	15	16	0.0165631	1	1.05655e-13	-0.718314	0.0933569	9.999e-05	9.90392e-10	8.71815e-10	0.000356026	-1.20419	-1.74852	-0.824815
Cells_Cultured_fibroblasts	ENSG00000111725.10	PRKAB1	chr12	119667753	119681630	+	6702	1.03654	899.255	369.129	4.97964e-53	chr12_119671479_AGGCACCTCTTCACAGGAC_A_b38	3726	chr12	119671479	AGGCACCTCTTCACAGGAC	A	1	rs138621699	69	70	0.0724638	1	3.99712e-59	1.13203	0.0590004	9.999e-05	6.93798e-52	4.41905e-51	0.000208587	0.53415	0.478858	0.592359
Cells_Cultured_fibroblasts	ENSG00000172915.18	NBEA	chr13	34942287	35673022	+	7098	1.0436	831.036	368.615	6.07812e-10	chr13_35261389_G_A_b38	319102	chr13	35261389	G	A	1	rs73489536	28	29	0.0300207	1	5.72089e-11	0.547547	0.081371	9.999e-05	2.63371e-07	1.90373e-07	0.000229371	0.791273	0.597085	0.930708
Cells_Cultured_fibroblasts	ENSG00000183648.9	NDUFB1	chr14	92116122	92121917	-	8455	1.05291	994.499	359.258	1.87432e-16	chr14_92115235_A_G_b38	-6682	chr14	92115235	A	G	1	rs35791930	278	331	0.34265	1	1.09689e-18	-0.22635	0.0244342	9.999e-05	3.86211e-14	4.60139e-14	0.000195736	-0.133723	-0.165653	-0.097667
Cells_Cultured_fibroblasts	ENSG00000168398.6	BDKRB2	chr14	96204679	96244166	+	8698	1.0487	1301.77	368.564	1.93402e-07	chr14_96177214_A_G_b38	-27465	chr14	96177214	A	G	1	rs7142070	31	32	0.0331263	1	3.57113e-08	0.484277	0.0862128	0.00019998	0.000164596	8.90375e-05	0.000148133	1.22936	1.00391	1.49475
Cells_Cultured_fibroblasts	ENSG00000137801.10	THBS1	chr15	39581079	39599466	+	7961	1.04431	1000.82	363.008	1.53525e-10	chr15_39363841_G_C_b38	-217238	chr15	39363841	G	C	1	rs11638501	331	427	0.442029	1	8.55127e-12	-0.174358	0.024799	9.999e-05	7.52077e-08	5.7197e-08	0.00019077	-0.362502	-0.441337	-0.270102
Cells_Cultured_fibroblasts	ENSG00000137806.8	NDUFAF1	chr15	41387349	41402519	-	6332	1.04529	509.062	356.838	4.51574e-44	chr15_41498262_C_T_b38	95743	chr15	41498262	C	T	1	rs1757460	172	195	0.201863	1	9.72991e-51	-0.514854	0.0297949	9.999e-05	3.25319e-43	1.52619e-42	0.000375847	-0.338865	-0.382118	-0.30396
Cells_Cultured_fibroblasts	ENSG00000140443.13	IGF1R	chr15	98648971	98964530	+	9669	1.02988	1648.04	374.574	5.82314e-08	chr15_98643092_A_G_b38	-5879	chr15	98643092	A	G	1	rs6598538	357	461	0.477226	-1	1.227e-08	0.203312	0.0349738	0.00019998	7.18556e-05	4.0604e-05	0.000112088	0.142597	0.104773	0.183659
Cells_Cultured_fibroblasts	ENSG00000167720.12	SRR	chr17	2303383	2325260	+	8461	1.0324	1607.59	376.449	1.47013e-85	chr17_2304032_G_A_b38	649	chr17	2304032	G	A	1	rs3744270	252	307	0.317805	1	1.08601e-93	-0.756631	0.0279161	9.999e-05	5.28005e-85	1.12954e-83	0.00011558	-0.730837	-0.770233	-0.686989
Cells_Cultured_fibroblasts	ENSG00000181856.14	SLC2A4	chr17	7281667	7288251	+	8013	1.04026	1465.62	375.259	6.94111e-11	chr17_7280727_G_A_b38	-940	chr17	7280727	G	A	1	rs5412	130	139	0.143892	1	7.78535e-12	0.521963	0.0740847	9.999e-05	5.22789e-08	4.03774e-08	0.000129081	0.776629	0.584687	0.930486
Cells_Cultured_fibroblasts	ENSG00000142494.13	SLC47A1	chr17	19495385	19579034	+	4687	1.02373	504.069	367.909	4.10408e-80	chr17_19535008_T_C_b38	39623	chr17	19535008	T	C	1	rs2453580	308	382	0.395445	1	1.03591e-89	-0.878835	0.0335817	9.999e-05	3.10209e-79	5.31366e-78	0.000361208	-2.69102	-2.90607	-2.51589
Cells_Cultured_fibroblasts	ENSG00000171298.12	GAA	chr17	80101556	80119879	+	9997	1.01892	1936.14	377.457	2.31401e-68	chr17_80101663_G_C_b38	107	chr17	80101663	G	C	1	rs2304849	188	205	0.212215	1	1.24386e-74	-0.618194	0.0272352	9.999e-05	2.69303e-66	2.83023e-65	9.29974e-05	-1.2365	-1.41549	-1.08752
Cells_Cultured_fibroblasts	ENSG00000176105.13	YES1	chr18	721588	812546	-	7891	1.02654	1256.56	376.278	1.97699e-11	chr18_812660_G_T_b38	114	chr18	812660	G	T	1	rs73372156	97	101	0.104555	1	2.09785e-12	-0.225889	0.0311663	9.999e-05	1.54317e-08	1.24356e-08	0.00014587	-0.175636	-0.249375	-0.138783
Cells_Cultured_fibroblasts	ENSG00000267855.5	NDUFA7	chr19	8308768	8321396	-	9066	1.03041	1431.47	370.399	7.12914e-08	chr19_8316279_T_C_b38	-5117	chr19	8316279	T	C	1	rs2972570	307	396	0.409938	1	1.27273e-08	0.0961557	0.0165596	9.999e-05	7.61594e-05	4.29201e-05	0.000129203	0.082851	0.063801	0.09948
Cells_Cultured_fibroblasts	ENSG00000171051.8	FPR1	chr19	51745172	51804110	-	10609	1.0523	1590.48	366.215	7.73037e-31	chr19_51741925_G_A_b38	-62185	chr19	51741925	G	A	1	rs73568373	91	97	0.100414	1	1.44313e-34	0.807794	0.0599372	9.999e-05	4.70328e-29	1.24867e-28	0.000122229	1.49275	1.28886	1.66015
Cells_Cultured_fibroblasts	ENSG00000170906.15	NDUFA3	chr19	54102728	54109257	+	12746	1.02682	2844.63	383.527	6.79599e-47	chr19_54109321_G_A_b38	6593	chr19	54109321	G	A	1	rs254262	224	255	0.263975	1	2.29539e-50	0.44194	0.0257022	9.999e-05	1.36718e-44	6.65389e-44	6.44801e-05	0.27563	0.248672	0.304174
Cells_Cultured_fibroblasts	ENSG00000160194.17	NDUFV3	chr21	42879644	42913304	+	8344	1.03053	1286.08	370.157	9.87711e-95	chr21_42903610_C_T_b38	23966	chr21	42903610	C	T	1	rs4148974	46	48	0.0496894	1	1.74231e-105	-1.37194	0.0458408	9.999e-05	2.10411e-94	6.32986e-93	0.000143848	-1.35092	-1.5436	-1.04726
Cells_Cultured_fibroblasts	ENSG00000100030.14	MAPK1	chr22	21754500	21867680	-	8085	1.06566	1105.94	367.929	5.09376e-08	chr22_21841117_T_C_b38	-26563	chr22	21841117	T	C	1	rs9610400	325	434	0.449275	1	7.81121e-09	0.0786061	0.0133353	9.999e-05	2.87813e-05	1.69814e-05	0.000181058	0.034558	0.024914	0.045622
Cells_Cultured_fibroblasts	ENSG00000184983.9	NDUFA6	chr22	42085525	42090930	-	7183	1.04467	559.755	355.295	5.03073e-66	chr22_42090076_G_A_b38	-854	chr22	42090076	G	A	1	rs1989202	36	37	0.0383023	1	1.84832e-76	0.806881	0.0349076	9.999e-05	4.43578e-66	4.6415e-65	0.000341337	0.617906	0.571802	0.647125
Cells_Cultured_fibroblasts	ENSG00000100197.20	CYP2D6	chr22	42126499	42130906	-	7271	1.05041	556.758	350.949	1.58007e-21	chr22_42138673_C_T_b38	7767	chr22	42138673	C	T	1	rs2743451	337	434	0.449275	-1	4.70457e-25	0.475053	0.0429808	9.999e-05	1.05822e-19	1.74796e-19	0.000347643	0.92176	0.748443	1.06785
Cells_Cultured_fibroblasts	ENSG00000147123.10	NDUFB11	chrX	47142216	47144868	-	3948	1.03573	518.185	373.021	2.28063e-12	chrX_47103572_G_A_b38	-41296	chrX	47103572	G	A	1	rs67792743	201	332	0.343685	-1	1.54714e-13	0.148085	0.0193871	9.999e-05	5.5829e-10	5.01912e-10	0.000361275	0.086086	0.063386	0.106513
Cells_Cultured_fibroblasts	ENSG00000072506.12	HSD17B10	chrX	53431258	53434373	-	2292	1.01873	333.612	373.928	1.42231e-24	chrX_53353617_A_C_b38	-80756	chrX	53353617	A	C	1	rs981757250	266	452	0.467909	-1	5.66364e-27	-0.185054	0.0160072	9.999e-05	1.87644e-22	3.57842e-22	0.000539342	-0.131113	-0.145102	-0.111219
Cells_Cultured_fibroblasts	ENSG00000169083.16	AR	chrX	67544032	67730619	+	3880	1.04989	218.386	354.145	3.09414e-09	chrX_67373369_G_A_b38	-170663	chrX	67373369	G	A	1	rs2473881	147	247	0.255694	1	1.54665e-10	-0.160757	0.0244798	9.999e-05	3.25464e-07	2.33259e-07	0.000884956	-0.173912	-0.21629	-0.12548
Cells_EBV-transformed_lymphocytes	ENSG00000168653.10	NDUFS5	chr1	39026318	39034636	+	6847	1.05591	1062.86	113.1	5.24649e-30	chr1_39056137_C_G_b38	29819	chr1	39056137	C	G	1	rs6682588	65	77	0.261905	1	3.0324e-32	-0.869717	0.0536112	9.999e-05	1.85299e-28	3.27555e-26	2.60581e-05	-0.64577	-0.706049	-0.592199
Cells_EBV-transformed_lymphocytes	ENSG00000023228.13	NDUFS1	chr2	206114817	206159584	-	6870	1.02634	1012.89	111.528	2.05791e-09	chr2_206128713_T_A_b38	-30871	chr2	206128713	T	A	1	rs7558619	94	121	0.435252	-1	3.6242e-10	-0.275997	0.040434	9.999e-05	1.46022e-06	1.09549e-05	2.43013e-05	-0.149866	-0.188802	-0.116419
Cells_EBV-transformed_lymphocytes	ENSG00000130414.11	NDUFA10	chr2	239892450	240025402	-	10077	1.02206	1899.55	114.566	6.76538e-15	chr2_240027895_G_A_b38	2493	chr2	240027895	G	A	1	rs10166776	85	108	0.367347	1	9.09047e-16	-0.762849	0.0824377	9.999e-05	7.32069e-12	1.35551e-10	1.27324e-05	-0.251061	-0.291685	-0.201129
Cells_EBV-transformed_lymphocytes	ENSG00000196620.9	UGT2B15	chr4	68646630	68670628	-	9391	1.01481	666.721	114.018	2.64846e-18	chr4_68488632_G_A_b38	-181996	chr4	68488632	G	A	1	rs34109652	90	117	0.397959	-1	1.76338e-19	0.87479	0.0810332	9.999e-05	1.06083e-15	3.09318e-14	3.51997e-05	5.68892	4.83899	6.21833
Cells_EBV-transformed_lymphocytes	ENSG00000109390.11	NDUFC1	chr4	139289917	139302551	-	6947	1.02815	1078.3	111.73	2.96296e-12	chr4_139333364_T_C_b38	30813	chr4	139333364	T	C	1	rs747004	74	90	0.306122	1	2.99749e-13	0.445797	0.0544516	9.999e-05	1.81979e-09	2.29264e-08	2.29966e-05	0.342016	0.261912	0.438212
Cells_EBV-transformed_lymphocytes	ENSG00000110092.3	CCND1	chr11	69641087	69654474	+	8325	1.02677	1162.66	111.003	1.3864e-09	chr11_69264019_G_GCA_b38	-377068	chr11	69264019	G	GCA	1	rs34297632	105	145	0.493197	1	2.13581e-10	0.543357	0.0784012	9.999e-05	1.11493e-06	8.60408e-06	2.12082e-05	1.50921	1.17268	1.87252
Cells_EBV-transformed_lymphocytes	ENSG00000181929.11	PRKAG1	chr12	49002274	49017402	-	6270	1.04469	570.178	109.18	4.9589e-08	chr12_49018926_G_A_b38	1524	chr12	49018926	G	A	1	rs2293446	87	109	0.370748	1	8.1478e-09	0.358905	0.0579303	0.00019998	1.73637e-05	0.00010607	4.64799e-05	0.183925	0.118661	0.235629
Cells_EBV-transformed_lymphocytes	ENSG00000184752.12	NDUFA12	chr12	94897055	95003770	-	8936	1.06216	1121.19	109.776	2.62721e-17	chr12_95003776_T_C_b38	6	chr12	95003776	T	C	1	rs835044	83	99	0.336735	-1	4.5516e-19	-0.520441	0.0489822	9.999e-05	4.13198e-15	1.14116e-13	2.53069e-05	-0.319916	-0.374367	-0.271344
Cells_EBV-transformed_lymphocytes	ENSG00000111725.10	PRKAB1	chr12	119667753	119681630	+	6702	1.04937	869.008	110.3	3.57402e-10	chr12_119709120_G_A_b38	41367	chr12	119709120	G	A	1	rs11064881	20	20	0.0680272	1	4.18983e-11	1.23021	0.169711	9.999e-05	1.45036e-07	1.31689e-06	3.1066e-05	0.616298	0.499736	0.69314
Cells_EBV-transformed_lymphocytes	ENSG00000137806.8	NDUFAF1	chr15	41387349	41402519	-	6332	1.05127	491.896	106.583	1.29544e-27	chr15_41480495_G_A_b38	77976	chr15	41480495	G	A	1	rs316607	52	60	0.204082	1	2.20338e-31	-0.8935	0.0564085	9.999e-05	3.58124e-26	4.31564e-24	5.52917e-05	-0.767625	-0.921572	-0.669779
Cells_EBV-transformed_lymphocytes	ENSG00000167720.12	SRR	chr17	2303383	2325260	+	8461	1.04193	1489.98	112.54	2.0532e-23	chr17_2304032_G_A_b38	649	chr17	2304032	G	A	1	rs3744270	65	80	0.272109	1	2.97304e-25	-0.742562	0.0562633	9.999e-05	4.56423e-21	2.9339e-19	1.75934e-05	-0.715995	-0.804672	-0.63358
Cells_EBV-transformed_lymphocytes	ENSG00000171298.12	GAA	chr17	80101556	80119879	+	9997	1.02496	1878.4	112.457	1.23374e-14	chr17_80101663_G_C_b38	107	chr17	80101663	G	C	1	rs2304849	52	57	0.193878	1	9.40232e-16	-1.00474	0.108649	9.999e-05	1.24429e-11	2.22036e-10	1.30302e-05	-1.47724	-1.64068	-1.32459
Cells_EBV-transformed_lymphocytes	ENSG00000170906.15	NDUFA3	chr19	54102728	54109257	+	12746	1.01992	2468.81	112.826	2.88797e-09	chr19_54109321_G_A_b38	6593	chr19	54109321	G	A	1	rs254262	73	80	0.272109	1	6.59425e-10	0.489988	0.0730597	9.999e-05	5.58278e-06	3.77299e-05	9.71032e-06	0.295975	0.2388	0.351401
Cells_EBV-transformed_lymphocytes	ENSG00000160194.17	NDUFV3	chr21	42879644	42913304	+	8344	1.07612	1245.52	109.323	7.66548e-12	chr21_42903610_C_T_b38	23966	chr21	42903610	C	T	1	rs4148974	9	9	0.0306122	1	4.74967e-13	-1.72855	0.213374	9.999e-05	2.26257e-09	2.79751e-08	2.40228e-05	-1.21574	-1.36974	-1.04394
Cells_EBV-transformed_lymphocytes	ENSG00000184983.9	NDUFA6	chr22	42085525	42090930	-	7183	1.05726	521.84	105.106	7.05687e-17	chr22_42084417_G_A_b38	-6513	chr22	42084417	G	A	1	rs139043947	5	5	0.0170068	1	2.37006e-19	1.76776	0.16456	9.999e-05	6.10862e-15	1.65729e-13	5.33507e-05	1.10953	0.997455
Cells_EBV-transformed_lymphocytes	ENSG00000100197.20	CYP2D6	chr22	42126499	42130906	-	7271	1.04177	546.54	105.368	4.16333e-10	chr22_42113662_A_G_b38	-17244	chr22	42113662	A	G	1	rs6002620	100	125	0.42517	-1	1.75686e-11	0.636306	0.085794	9.999e-05	1.1794e-07	1.09189e-06	4.79307e-05	0.890602	0.677882	1.06162
Cells_EBV-transformed_lymphocytes	ENSG00000072506.12	HSD17B10	chrX	53431258	53434373	-	2292	1.03209	368.643	117.806	9.98757e-12	chrX_53434412_G_C_b38	39	chrX	53434412	G	C	1	rs1264014	82	141	0.479592	1	4.29054e-12	-0.231423	0.0301092	9.999e-05	1.94712e-09	2.43437e-08	6.83489e-05	-0.23591	-0.291254	-0.188521
Colon_Sigmoid	ENSG00000168653.10	NDUFS5	chr1	39026318	39034636	+	6847	1.02285	950.331	238.177	5.59531e-74	chr1_39026790_C_T_b38	472	chr1	39026790	C	T	1	rs3768324	160	191	0.300314	1	1.65828e-81	-0.742064	0.0263067	9.999e-05	1.3044e-72	2.42921e-70	7.20205e-05	-0.56778	-0.605271	-0.533144
Colon_Sigmoid	ENSG00000085832.16	EPS15	chr1	51354263	51519328	-	4443	1.0484	237.887	224.834	1.11897e-13	chr1_51370670_G_A_b38	-148658	chr1	51370670	G	A	1	rs148648502	38	38	0.0597484	1	9.5191e-16	0.653404	0.0763256	9.999e-05	8.02122e-12	2.9006e-11	0.000311407	0.300224	0.245699	0.402971
Colon_Sigmoid	ENSG00000243480.7	AMY2A	chr1	103616811	103625780	+	8055	1.04973	487.058	230.613	2.09373e-08	chr1_103489757_T_C_b38	-127054	chr1	103489757	T	C	1	rs78200622	56	58	0.091195	1	2.15788e-09	0.776022	0.125136	9.999e-05	5.63389e-06	1.07468e-05	0.000152731	2.41001	1.93853	2.89627
Colon_Sigmoid	ENSG00000134184.12	GSTM1	chr1	109687814	109693745	+	6623	1.05599	928.686	233.541	6.74493e-12	chr1_109675302_G_A_b38	-12512	chr1	109675302	G	A	1	rs611951	94	102	0.160377	-1	3.24511e-13	-0.795187	0.103608	9.999e-05	2.12268e-09	6.04531e-09	8.1634e-05	-4.57974	-5.39597	-3.8949
Colon_Sigmoid	ENSG00000131781.12	FMO5	chr1	147175351	147243050	-	6443	1.05818	712.238	234.838	6.79369e-08	chr1_147097371_A_G_b38	-145679	chr1	147097371	A	G	1	rs11239931	140	172	0.27044	1	1.11913e-08	0.251007	0.0425488	9.999e-05	2.64553e-05	4.58216e-05	0.000107141	0.259146	0.140008	0.339875
Colon_Sigmoid	ENSG00000023228.13	NDUFS1	chr2	206114817	206159584	-	6870	1.03045	843.592	230.973	7.1745e-14	chr2_206134960_T_G_b38	-24624	chr2	206134960	T	G	1	rs10166505	229	312	0.490566	-1	1.37423e-15	-0.188451	0.0221537	9.999e-05	2.91804e-11	1.00353e-10	8.30992e-05	-0.160441	-0.190376	-0.125749
Colon_Sigmoid	ENSG00000130414.11	NDUFA10	chr2	239892450	240025402	-	10077	1.04982	1486.75	233.926	2.24405e-23	chr2_239960810_G_A_b38	-64592	chr2	239960810	G	A	1	rs8369	78	81	0.127358	1	4.38859e-26	-0.687997	0.0582888	9.999e-05	3.49533e-21	2.62201e-20	5.00526e-05	-0.337943	-0.38916	-0.272335
Colon_Sigmoid	ENSG00000142330.19	CAPN10	chr2	240586716	240617705	+	9651	1.05829	1284.91	232.616	1.20431e-09	chr2_240600266_T_C_b38	13550	chr2	240600266	T	C	1	rs67745756	90	97	0.152516	1	1.01076e-10	-0.262459	0.0389533	9.999e-05	6.91461e-07	1.47168e-06	5.94113e-05	-0.195523	-0.238212	-0.151047
Colon_Sigmoid	ENSG00000180767.9	CHST13	chr3	126524283	126543291	+	9352	1.0347	849.861	235.531	1.77037e-20	chr3_126528952_C_T_b38	4669	chr3	126528952	C	T	1	rs11717719	213	289	0.454403	-1	1.0999e-22	0.583575	0.0541272	9.999e-05	3.8648e-18	2.36827e-17	8.35873e-05	1.91914	1.62148	2.24444
Colon_Sigmoid	ENSG00000109390.11	NDUFC1	chr4	139289917	139302551	-	6947	1.02828	956.922	234.183	3.69174e-08	chr4_139494003_G_C_b38	191452	chr4	139494003	G	C	1	rs11730829	213	286	0.449686	-1	5.39352e-09	-0.175442	0.0290728	9.999e-05	2.61154e-05	4.52695e-05	7.27611e-05	-0.099658	-0.134457	-0.072266
Colon_Sigmoid	ENSG00000133710.15	SPINK5	chr5	148025683	148137289	+	7805	1.03268	888.459	236.045	1.83459e-16	chr5_148112545_C_T_b38	86862	chr5	148112545	C	T	1	rs7707841	203	254	0.399371	-1	3.60244e-18	-0.506848	0.0541295	9.999e-05	6.13858e-14	2.68028e-13	7.94548e-05	-1.22765	-1.44559	-0.990135
Colon_Sigmoid	ENSG00000123545.5	NDUFAF4	chr6	96889313	96897881	-	7110	1.0661	495.186	227.107	1.1901e-21	chr6_96856559_C_G_b38	-41322	chr6	96856559	C	G	1	rs1359930	81	83	0.130503	-1	7.97647e-25	-0.515196	0.0450812	9.999e-05	3.56948e-20	2.50439e-19	0.000157768	-0.401375	-0.452202	-0.334768
Colon_Sigmoid	ENSG00000164638.10	SLC29A4	chr7	5274369	5306789	+	10514	1.04928	1221.27	228.661	1.48017e-07	chr7_5271688_T_C_b38	-2681	chr7	5271688	T	C	1	rs4724493	162	191	0.300314	-1	1.73448e-08	-0.275647	0.0473865	9.999e-05	0.000115682	0.000184031	6.08328e-05	-0.422528	-0.522761	-0.283198
Colon_Sigmoid	ENSG00000090266.12	NDUFB2	chr7	140696821	140706646	+	6210	1.04339	732.206	229.637	3.67598e-11	chr7_140696918_G_A_b38	97	chr7	140696918	G	A	1	rs113951414	16	16	0.0251572	1	1.42193e-12	-0.626006	0.0841297	9.999e-05	1.2397e-08	3.23488e-08	9.96552e-05	-0.513927	-0.621269	-0.329451
Colon_Sigmoid	ENSG00000254087.7	LYN	chr8	55879813	56014168	+	7973	1.04634	706.759	232.565	1.95439e-07	chr8_55903808_G_T_b38	23995	chr8	55903808	G	T	1	rs112105166	106	119	0.187107	1	3.12418e-08	0.275015	0.048205	0.00019998	8.96621e-05	0.000144707	0.000104178	0.408956	0.310188	0.510217
Colon_Sigmoid	ENSG00000174775.16	HRAS	chr11	532242	537287	-	6400	1.04767	802.11	232.873	3.34516e-14	chr11_531224_A_G_b38	-6063	chr11	531224	A	G	1	rs12785860	179	220	0.345912	1	7.57652e-16	-0.215974	0.0251298	9.999e-05	8.23588e-12	2.9732e-11	9.21677e-05	-0.174686	-0.204988	-0.142455
Colon_Sigmoid	ENSG00000006071.12	ABCC8	chr11	17392885	17476845	-	6843	1.02326	786.815	236.379	8.40731e-15	chr11_17476510_G_A_b38	-335	chr11	17476510	G	A	1	rs77889556	95	106	0.166667	1	2.66654e-16	0.562989	0.0643618	9.999e-05	3.59852e-12	1.34382e-11	8.71001e-05	0.758276	0.589663	0.891437
Colon_Sigmoid	ENSG00000167792.11	NDUFV1	chr11	67606852	67612535	+	6269	1.04265	557.724	229.663	5.83691e-08	chr11_67616086_C_T_b38	9234	chr11	67616086	C	T	1	rs56092845	236	315	0.495283	-1	6.44303e-09	-0.203696	0.033939	9.999e-05	2.05657e-05	3.62957e-05	0.000130532	-0.090525	-0.113955	-0.061665
Colon_Sigmoid	ENSG00000110717.12	NDUFS8	chr11	68030627	68036644	+	7034	1.06122	604.219	226.953	6.16045e-10	chr11_68030896_T_TCAGGGCGCCGGCC_b38	269	chr11	68030896	T	TCAGGGCGCCGGCC	1	rs200951888	130	139	0.219243	1	2.72997e-11	0.254289	0.0365436	9.999e-05	1.46389e-07	3.38662e-07	0.000127444	0.183204	0.151787	0.218915
Colon_Sigmoid	ENSG00000151366.12	NDUFC2	chr11	78068352	78080219	-	7061	1.05391	655.533	229.213	4.23742e-10	chr11_78117779_T_A_b38	37560	chr11	78117779	T	A	1	rs7111745	89	100	0.157233	1	2.22565e-11	-0.305798	0.0437319	9.999e-05	1.20224e-07	2.80708e-07	0.000114925	-0.155214	-0.191413	-0.120861
Colon_Sigmoid	ENSG00000133703.11	KRAS	chr12	25205136	25250936	-	8603	1.04791	1018.61	233.027	4.57105e-31	chr12_25287791_A_G_b38	36855	chr12	25287791	A	G	1	rs73081296	44	45	0.0707547	1	7.47901e-35	0.901705	0.0628756	9.999e-05	2.2364e-29	2.81329e-28	7.26322e-05	0.609313	0.559542	0.682422
Colon_Sigmoid	ENSG00000076555.15	ACACB	chr12	109116595	109268226	+	6984	1.05354	814.979	232.706	2.24915e-08	chr12_109242198_T_A_b38	125603	chr12	109242198	T	A	1	rs2160602	194	244	0.383648	-1	2.76098e-09	-0.204314	0.0331848	9.999e-05	9.98508e-06	1.84232e-05	9.23396e-05	-0.216256	-0.286655	-0.165984
Colon_Sigmoid	ENSG00000137806.8	NDUFAF1	chr15	41387349	41402519	-	6332	1.06943	493.168	227.081	1.84076e-11	chr15_41491616_A_G_b38	89097	chr15	41491616	A	G	1	rs1757463	156	194	0.305031	1	4.7939e-13	-0.267727	0.0351642	9.999e-05	2.43358e-09	6.88496e-09	0.000159975	-0.146838	-0.180011	-0.11098
Colon_Sigmoid	ENSG00000140675.12	SLC5A2	chr16	31483002	31489338	+	3566	1.04045	330.962	227.107	3.03976e-10	chr16_31465137_C_T_b38	-17865	chr16	31465137	C	T	1	rs11150624	218	281	0.441824	1	1.22633e-11	-0.42724	0.060249	9.999e-05	5.15195e-08	1.25598e-07	0.00021847	-0.805421	-0.958815	-0.629625
Colon_Sigmoid	ENSG00000167720.12	SRR	chr17	2303383	2325260	+	8461	1.03807	1541.51	240.655	9.16588e-54	chr17_2304032_G_A_b38	649	chr17	2304032	G	A	1	rs3744270	161	195	0.306604	1	1.34568e-58	-0.770933	0.0364913	9.999e-05	1.75927e-52	9.13399e-51	4.65685e-05	-0.762554	-0.815893	-0.720252
Colon_Sigmoid	ENSG00000142494.13	SLC47A1	chr17	19495385	19579034	+	4687	1.04328	473.134	232.038	4.35667e-14	chr17_19535008_T_C_b38	39623	chr17	19535008	T	C	1	rs2453580	207	257	0.404088	1	9.07148e-16	-0.523423	0.0610916	9.999e-05	6.97371e-12	2.54327e-11	0.000154164	-0.938898	-1.20905	-0.757399
Colon_Sigmoid	ENSG00000171298.12	GAA	chr17	80101556	80119879	+	9997	1.02062	1911.28	241.272	7.38271e-41	chr17_80101663_G_C_b38	107	chr17	80101663	G	C	1	rs2304849	135	153	0.240566	1	2.18363e-44	-0.863531	0.0506688	9.999e-05	2.4305e-38	5.14106e-37	3.55582e-05	-0.55835	-0.631389	-0.498075
Colon_Sigmoid	ENSG00000176105.13	YES1	chr18	721588	812546	-	7891	1.04162	1190.79	237.471	2.22657e-08	chr18_809504_T_C_b38	-3042	chr18	809504	T	C	1	rs1940293	122	140	0.220126	1	3.93291e-09	0.211827	0.0347686	9.999e-05	1.67919e-05	2.99751e-05	6.09469e-05	0.1168	0.086557	0.161779
Colon_Sigmoid	ENSG00000174886.12	NDUFA11	chr19	5891276	5904006	-	8886	1.0324	1418.41	236.366	4.10651e-12	chr19_5911957_C_G_b38	7951	chr19	5911957	C	G	1	rs274789	232	304	0.477987	-1	2.58446e-13	0.197506	0.0256147	9.999e-05	3.10708e-09	8.65936e-09	4.97262e-05	0.117668	0.080921	0.141954
Colon_Sigmoid	ENSG00000171051.8	FPR1	chr19	51745172	51804110	-	10609	1.04252	1611.46	236.417	5.48321e-08	chr19_51751943_A_G_b38	-52167	chr19	51751943	A	G	1	rs4802859	188	227	0.356918	-1	9.87285e-09	0.2185	0.036892	9.999e-05	5.83208e-05	9.65813e-05	4.5162e-05	0.915449	0.663629	1.2038
Colon_Sigmoid	ENSG00000170906.15	NDUFA3	chr19	54102728	54109257	+	12746	1.03984	2540.17	241.618	8.70992e-36	chr19_54108427_A_G_b38	5699	chr19	54108427	A	G	1	rs75622830	75	77	0.121069	1	8.30425e-39	0.739006	0.0477907	9.999e-05	1.19183e-33	1.93371e-32	2.84155e-05	0.469213	0.415159	0.518099
Colon_Sigmoid	ENSG00000160194.17	NDUFV3	chr21	42879644	42913304	+	8344	1.0449	1307.25	237.83	5.79772e-34	chr21_42903610_C_T_b38	23966	chr21	42903610	C	T	1	rs4148974	27	29	0.0455975	1	2.20217e-37	-1.21691	0.0808036	9.999e-05	3.30077e-32	4.85852e-31	5.60786e-05	-0.746067	-0.894356	-0.666724
Colon_Sigmoid	ENSG00000100191.5	SLC5A4	chr22	32218476	32255341	-	8455	1.0395	836.396	233.579	2.4185e-10	chr22_32351575_G_A_b38	96234	chr22	32351575	G	A	1	rs5754001	32	32	0.0503145	1	1.81915e-11	0.961528	0.136852	9.999e-05	1.08172e-07	2.53814e-07	8.62048e-05	1.88521	1.49711	2.13279
Colon_Sigmoid	ENSG00000184983.9	NDUFA6	chr22	42085525	42090930	-	7183	1.04735	505.559	224.834	1.44774e-28	chr22_42084417_G_A_b38	-6513	chr22	42084417	G	A	1	rs139043947	24	26	0.0408805	1	3.85742e-33	1.00733	0.0727188	9.999e-05	4.62779e-27	4.97425e-26	0.000146083	0.63857	0.589164	0.713474
Colon_Sigmoid	ENSG00000100197.20	CYP2D6	chr22	42126499	42130906	-	7271	1.07859	490.128	219.672	1.99119e-21	chr22_42141587_G_A_b38	10681	chr22	42141587	G	A	1	rs1800754	223	287	0.451258	-1	2.41154e-25	0.558671	0.0482306	9.999e-05	3.62027e-20	2.53794e-19	0.000165325	0.879215	0.760589	1.03031
Colon_Sigmoid	ENSG00000147123.10	NDUFB11	chrX	47142216	47144868	-	3948	1.03729	492.658	238.305	8.92901e-08	chrX_47113320_G_A_b38	-31548	chrX	47113320	G	A	1	rs112633495	62	93	0.146226	1	1.93124e-08	-0.238762	0.0411895	9.999e-05	2.97738e-05	5.12791e-05	0.000145349	-0.112887	-0.142272	-0.077194
Colon_Sigmoid	ENSG00000072506.12	HSD17B10	chrX	53431258	53434373	-	2292	1.04844	334.923	239.41	1.72741e-09	chrX_53422619_G_A_b38	-11754	chrX	53422619	G	A	1	rs1264011	167	275	0.43239	-1	2.75725e-10	-0.164049	0.0249875	9.999e-05	2.82471e-07	6.29019e-07	0.000221227	-0.081873	-0.106543	-0.058502
Colon_Transverse	ENSG00000168653.10	NDUFS5	chr1	39026318	39034636	+	6847	1.03733	928.194	265.755	1.48359e-83	chr1_39026790_C_T_b38	472	chr1	39026790	C	T	1	rs3768324	185	220	0.298913	1	1.77239e-93	-0.59388	0.0195052	9.999e-05	1.41459e-83	2.96949e-81	8.50648e-05	-0.492513	-0.516727	-0.465351
Colon_Transverse	ENSG00000085832.16	EPS15	chr1	51354263	51519328	-	4443	1.02764	236.949	254.813	1.6097e-15	chr1_51370670_G_A_b38	-148658	chr1	51370670	G	A	1	rs148648502	37	38	0.0516304	1	6.79846e-18	0.484894	0.0527475	9.999e-05	1.71022e-13	6.47286e-13	0.000323512	0.343979	0.277963	0.40563
Colon_Transverse	ENSG00000134184.12	GSTM1	chr1	109687814	109693745	+	6623	1.03956	1031.97	268.433	2.35827e-15	chr1_109675302_G_A_b38	-12512	chr1	109675302	G	A	1	rs611951	105	117	0.158967	-1	7.03277e-17	-0.795702	0.0897368	9.999e-05	8.30438e-13	2.96077e-12	7.70256e-05	-4.7793	-5.48717	-4.1212
Colon_Transverse	ENSG00000023228.13	NDUFS1	chr2	206114817	206159584	-	6870	1.02324	985.963	268.389	1.92432e-14	chr2_206145834_G_T_b38	-13750	chr2	206145834	G	T	1	rs6435330	266	362	0.491848	-1	7.17021e-16	-0.134999	0.0158141	9.999e-05	1.05844e-11	3.4402e-11	7.67165e-05	-0.144484	-0.168953	-0.121343
Colon_Transverse	ENSG00000242515.5	UGT1A10	chr2	233636454	233637377	+	8567	1.04537	1338.5	270.484	9.58244e-10	chr2_233756180_C_T_b38	119726	chr2	233756180	C	T	1	rs17874945	40	40	0.0543478	1	1.35993e-10	0.323851	0.0486644	9.999e-05	6.79508e-07	1.32285e-06	6.0426e-05	0.764509	0.479098	1.10035
Colon_Transverse	ENSG00000130414.11	NDUFA10	chr2	239892450	240025402	-	10077	1.03574	1629.14	268.476	1.48336e-23	chr2_240017565_G_A_b38	-7837	chr2	240017565	G	A	1	rs6732752	96	105	0.142663	1	5.69473e-26	-0.340248	0.0292979	9.999e-05	4.73521e-21	3.19392e-20	4.82347e-05	-0.330889	-0.367979	-0.290674
Colon_Transverse	ENSG00000142330.19	CAPN10	chr2	240586716	240617705	+	9651	1.04936	1364.02	263.878	8.04205e-12	chr2_240597275_G_A_b38	10559	chr2	240597275	G	A	1	rs3792275	100	108	0.146739	1	3.66939e-13	-0.285556	0.0375323	9.999e-05	4.34381e-09	1.09155e-08	6.00005e-05	-0.161732	-0.204641	-0.121124
Colon_Transverse	ENSG00000180767.9	CHST13	chr3	126524283	126543291	+	9352	1.03546	875.909	266.061	1.36805e-39	chr3_126528355_T_A_b38	4072	chr3	126528355	T	A	1	rs3856650	250	330	0.44837	1	3.84379e-44	-0.525886	0.0317474	9.999e-05	6.28408e-38	1.09929e-36	8.96353e-05	-2.31379	-2.45599	-2.05658
Colon_Transverse	ENSG00000196620.9	UGT2B15	chr4	68646630	68670628	-	9391	1.04496	531.483	258	2.44417e-40	chr4_68495042_C_T_b38	-175586	chr4	68495042	C	T	1	rs34594059	236	299	0.40625	-1	2.48103e-46	0.503144	0.0293427	9.999e-05	2.79721e-39	5.26798e-38	0.000151982	4.30572	3.75935	4.88093
Colon_Transverse	ENSG00000164258.11	NDUFS4	chr5	53560633	53683340	+	8298	1.04785	734.304	260.532	1.04449e-11	chr5_53519421_T_C_b38	-41212	chr5	53519421	T	C	1	rs56003370	109	121	0.164402	1	3.49861e-13	0.264824	0.0347737	9.999e-05	3.07154e-09	7.86543e-09	0.000110954	0.145382	0.118207	0.17361
Colon_Transverse	ENSG00000133710.15	SPINK5	chr5	148025683	148137289	+	7805	1.06093	841.012	262.467	1.32161e-07	chr5_148069632_C_T_b38	43949	chr5	148069632	C	T	1	rs986493	210	256	0.347826	-1	1.88489e-08	-0.186577	0.0322811	0.00029997	6.21258e-05	9.26041e-05	0.00010066	-0.654312	-0.851047	-0.51359
Colon_Transverse	ENSG00000123545.5	NDUFAF4	chr6	96889313	96897881	-	7110	1.0574	543.996	259.979	4.15795e-12	chr6_96787688_T_C_b38	-110193	chr6	96787688	T	C	1	rs850434	89	91	0.123641	1	1.15204e-13	0.375994	0.0482921	9.999e-05	7.03491e-10	1.9082e-09	0.000154024	0.26635	0.21489	0.325343
Colon_Transverse	ENSG00000146477.5	SLC22A3	chr6	160348268	160452581	+	8277	1.03397	844.227	262.947	7.69519e-11	chr6_160323427_C_G_b38	-24841	chr6	160323427	C	G	1	rs423961	201	238	0.32337	1	4.28885e-12	-0.339042	0.046944	9.999e-05	3.64849e-08	8.27004e-08	9.25808e-05	-0.665424	-0.8128	-0.5065
Colon_Transverse	ENSG00000164638.10	SLC29A4	chr7	5274369	5306789	+	10514	1.05044	1387.53	260.925	8.83774e-08	chr7_5291989_G_C_b38	17620	chr7	5291989	G	C	1	rs6954178	211	242	0.328804	-1	1.08279e-08	-0.362015	0.0615379	9.999e-05	7.61464e-05	0.000111895	5.91721e-05	-0.468941	-0.618299	-0.321381
Colon_Transverse	ENSG00000090266.12	NDUFB2	chr7	140696821	140706646	+	6210	1.03374	837.609	266.425	1.04251e-17	chr7_140696918_G_A_b38	97	chr7	140696918	G	A	1	rs113951414	17	17	0.0230978	1	1.26213e-19	-0.643346	0.0660874	9.999e-05	2.88692e-15	1.26382e-14	9.32473e-05	-0.648103	-0.76939	-0.536911
Colon_Transverse	ENSG00000254087.7	LYN	chr8	55879813	56014168	+	7973	1.02579	733.879	264.621	2.66257e-09	chr8_55882672_T_C_b38	2859	chr8	55882672	T	C	1	rs1450739	127	141	0.191576	1	2.68395e-10	0.209145	0.0319833	9.999e-05	1.37675e-06	2.57312e-06	0.000103878	0.2832	0.211977	0.358034
Colon_Transverse	ENSG00000147684.7	NDUFB9	chr8	124543087	124568378	+	7990	1.06804	1109.75	266.468	9.64729e-11	chr8_124539123_A_G_b38	-3964	chr8	124539123	A	G	1	rs34681068	69	74	0.100543	1	7.63232e-12	0.157489	0.0220889	9.999e-05	3.48545e-08	7.91089e-08	7.78648e-05	0.161381	0.1277	0.21202
Colon_Transverse	ENSG00000138115.13	CYP2C8	chr10	95036772	95069497	-	7085	1.04584	493.64	261.143	7.77739e-10	chr10_95237832_A_G_b38	168335	chr10	95237832	A	G	1	rs1049961	225	275	0.373641	1	5.03787e-11	-0.283454	0.0415555	9.999e-05	1.9118e-07	3.96774e-07	0.00016406	-0.836968	-1.0387	-0.646115
Colon_Transverse	ENSG00000174775.16	HRAS	chr11	532242	537287	-	6400	1.04441	770.953	259.411	2.55882e-16	chr11_539648_G_A_b38	2361	chr11	539648	G	A	1	rs1870726	149	169	0.22962	1	1.6091e-18	-0.334339	0.0356038	9.999e-05	5.2777e-14	2.07602e-13	0.000104607	-0.197797	-0.24058	-0.162928
Colon_Transverse	ENSG00000006071.12	ABCC8	chr11	17392885	17476845	-	6843	1.04571	838.844	267.967	1.46799e-10	chr11_17476247_C_G_b38	-598	chr11	17476247	C	G	1	rs985136	272	367	0.498641	-1	1.39055e-11	0.357268	0.0508013	9.999e-05	5.8334e-08	1.28437e-07	9.65134e-05	0.498882	0.359499	0.609664
Colon_Transverse	ENSG00000151366.12	NDUFC2	chr11	78068352	78080219	-	7061	1.01861	734.523	264.737	8.13394e-14	chr11_78057105_A_G_b38	-23114	chr11	78057105	A	G	1	rs6592763	103	117	0.158967	-1	2.29533e-15	0.218028	0.0260542	9.999e-05	3.82444e-11	1.18027e-10	0.000101511	0.186437	0.162288	0.215896
Colon_Transverse	ENSG00000133703.11	KRAS	chr12	25205136	25250936	-	8603	1.04618	1049.93	264.868	1.07941e-11	chr12_25287791_A_G_b38	36855	chr12	25287791	A	G	1	rs73081296	44	45	0.0611413	1	5.64708e-13	0.31829	0.042205	9.999e-05	4.77117e-09	1.19198e-08	7.72184e-05	0.306716	0.241633	0.385738
Colon_Transverse	ENSG00000184752.12	NDUFA12	chr12	94897055	95003770	-	8936	1.03193	1095.77	264.446	8.17277e-08	chr12_94993587_T_C_b38	-10183	chr12	94993587	T	C	1	rs9739426	252	317	0.430707	1	1.24117e-08	0.150616	0.0257131	0.00019998	6.55856e-05	9.75416e-05	7.08893e-05	0.100692	0.073469	0.127993
Colon_Transverse	ENSG00000111725.10	PRKAB1	chr12	119667753	119681630	+	6702	1.04545	798.969	261.085	1.10132e-12	chr12_119671479_AGGCACCTCTTCACAGGAC_A_b38	3726	chr12	119671479	AGGCACCTCTTCACAGGAC	A	1	rs138621699	44	45	0.0611413	1	2.85723e-14	0.340016	0.0425223	9.999e-05	3.34386e-10	9.39892e-10	0.000101252	0.406287	0.296174	0.512095
Colon_Transverse	ENSG00000137806.8	NDUFAF1	chr15	41387349	41402519	-	6332	1.0513	499.741	256.836	1.00544e-09	chr15_41415441_A_AAATG_b38	12922	chr15	41415441	A	AAATG	1	rs111637342	65	71	0.0964674	1	4.68066e-11	-0.445329	0.0651703	9.999e-05	2.33442e-07	4.79627e-07	0.000164694	-0.289596	-0.356324	-0.223162
Colon_Transverse	ENSG00000140443.13	IGF1R	chr15	98648971	98964530	+	9669	1.0296	1449.09	264.722	1.02294e-07	chr15_98957027_G_A_b38	308056	chr15	98957027	G	A	1	rs2593053	226	287	0.389946	1	1.62479e-08	-0.118452	0.0203965	9.999e-05	0.00011273	0.000161759	5.32267e-05	-0.110011	-0.148415	-0.08115
Colon_Transverse	ENSG00000140990.14	NDUFB10	chr16	1959508	1961975	+	8673	1.06303	1246.35	261.55	2.46415e-07	chr16_1954717_T_C_b38	-4791	chr16	1954717	T	C	1	rs2815301	127	145	0.197011	-1	3.61088e-08	0.153461	0.0271271	9.999e-05	0.000179362	0.000249549	6.83392e-05	0.109478	0.075619	0.136145
Colon_Transverse	ENSG00000140675.12	SLC5A2	chr16	31483002	31489338	+	3566	1.05278	355.301	257.927	2.70085e-09	chr16_31498495_T_C_b38	15493	chr16	31498495	T	C	1	rs11865835	191	232	0.315217	1	1.60459e-10	0.434633	0.0655874	9.999e-05	4.5126e-07	8.9883e-07	0.000232644	0.815233	0.648266	1.00549
Colon_Transverse	ENSG00000167720.12	SRR	chr17	2303383	2325260	+	8461	1.04747	1576.41	271.227	4.38656e-47	chr17_2304032_G_A_b38	649	chr17	2304032	G	A	1	rs3744270	178	208	0.282609	1	1.45316e-51	-0.765161	0.0412714	9.999e-05	6.05445e-46	1.57428e-44	5.16276e-05	-0.680071	-0.744803	-0.62952
Colon_Transverse	ENSG00000171298.12	GAA	chr17	80101556	80119879	+	9997	1.03882	1915.98	271.27	5.24327e-48	chr17_80101663_G_C_b38	107	chr17	80101663	G	C	1	rs2304849	143	160	0.217391	1	1.43612e-52	-0.919795	0.0489046	9.999e-05	1.93547e-46	5.20561e-45	4.1396e-05	-0.750354	-0.850462	-0.645675
Colon_Transverse	ENSG00000174886.12	NDUFA11	chr19	5891276	5904006	-	8886	1.0459	1533.8	268.36	1.58247e-23	chr19_5884662_C_T_b38	-19344	chr19	5884662	C	T	1	rs6510861	202	234	0.317935	-1	5.97128e-26	0.305092	0.0262841	9.999e-05	2.99264e-21	2.03771e-20	5.28153e-05	0.164378	0.141336	0.178123
Colon_Transverse	ENSG00000267855.5	NDUFA7	chr19	8308768	8321396	-	9066	1.01045	1585.56	273.584	3.4464e-08	chr19_8337761_A_T_b38	16365	chr19	8337761	A	T	1	rs2913958	125	142	0.19346	1	8.48872e-09	0.157935	0.026644	9.999e-05	4.90989e-05	7.4444e-05	4.58425e-05	0.139855	0.106765	0.177349
Colon_Transverse	ENSG00000171051.8	FPR1	chr19	51745172	51804110	-	10609	1.04238	1849.38	271.401	1.62297e-09	chr19_51749765_A_G_b38	-54345	chr19	51749765	A	G	1	rs4802857	195	229	0.311141	-1	2.60177e-10	0.239768	0.0366365	9.999e-05	1.71901e-06	3.17148e-06	4.33464e-05	0.9287	0.746938	1.11321
Colon_Transverse	ENSG00000170906.15	NDUFA3	chr19	54102728	54109257	+	12746	1.05749	2640.42	272.682	6.30904e-32	chr19_54108427_A_G_b38	5699	chr19	54108427	A	G	1	rs75622830	83	84	0.11413	1	9.72481e-35	0.543783	0.0387156	9.999e-05	4.10847e-30	4.79786e-29	3.17446e-05	0.402254	0.357243	0.439003
Colon_Transverse	ENSG00000160194.17	NDUFV3	chr21	42879644	42913304	+	8344	1.02874	1401.47	271.11	4.98529e-47	chr21_42903610_C_T_b38	23966	chr21	42903610	C	T	1	rs4148974	36	37	0.0502717	1	1.59208e-51	-1.29897	0.0701043	9.999e-05	3.9686e-45	9.90041e-44	5.4891e-05	-0.873083	-0.956923	-0.784322
Colon_Transverse	ENSG00000100191.5	SLC5A4	chr22	32218476	32255341	-	8455	1.04006	916.425	268.054	5.48294e-11	chr22_32355072_C_CCGCCCCCG_b38	99731	chr22	32355072	C	CCGCCCCCG	2	rs1276807958	32	33	0.045082	1	4.6983e-12	0.892495	0.123826	9.999e-05	2.51847e-08	5.80183e-08	8.68667e-05	2.09457	1.72593	2.39203
Colon_Transverse	ENSG00000184983.9	NDUFA6	chr22	42085525	42090930	-	7183	1.02945	528.69	254.595	2.95061e-31	chr22_42084417_G_A_b38	-6513	chr22	42084417	G	A	1	rs139043947	28	29	0.0394022	1	2.63436e-36	0.798967	0.0552181	9.999e-05	2.33724e-29	2.59895e-28	0.000145813	0.594196	0.5337	0.649216
Colon_Transverse	ENSG00000100197.20	CYP2D6	chr22	42126499	42130906	-	7271	1.0723	528.343	249.997	1.01319e-35	chr22_42138673_C_T_b38	7767	chr22	42138673	C	T	1	rs2743451	249	326	0.442935	-1	2.92428e-42	0.450581	0.0280493	9.999e-05	2.40627e-35	3.69162e-34	0.000165538	0.891047	0.792516	0.980979
Colon_Transverse	ENSG00000147123.10	NDUFB11	chrX	47142216	47144868	-	3948	1.03695	473.797	265.741	9.34809e-14	chrX_47100766_C_T_b38	-44102	chrX	47100766	C	T	1	rs35917906	180	308	0.418478	-1	3.02624e-15	0.196994	0.0236546	9.999e-05	1.80609e-11	5.7423e-11	0.000166446	0.117323	0.09976	0.136025
Colon_Transverse	ENSG00000072506.12	HSD17B10	chrX	53431258	53434373	-	2292	1.025	337.472	271.154	9.14556e-20	chrX_53422619_G_A_b38	-11754	chrX	53422619	G	A	1	rs1264011	200	336	0.456522	-1	1.43915e-21	-0.193655	0.0187545	9.999e-05	1.18016e-17	6.16338e-17	0.000225331	-0.130078	-0.146903	-0.108478
Colon_Transverse	ENSG00000169083.16	AR	chrX	67544032	67730619	+	3880	1.04562	237.983	260.459	2.9268e-07	chrX_68319666_G_A_b38	775634	chrX	68319666	G	A	1	rs186186623	6	9	0.0122283	1	4.11394e-08	0.44055	0.0782188	9.999e-05	4.41205e-05	6.73042e-05	0.000340035	1.10545	0.356155
Colon_Transverse	ENSG00000125356.6	NDUFA1	chrX	119871828	119876662	+	4918	1.04663	713.718	267.138	8.19384e-08	chrX_119868462_C_T_b38	-3366	chrX	119868462	C	T	1	rs2496224	205	342	0.464674	-1	1.47311e-08	0.0773298	0.0132738	0.00019998	3.63713e-05	5.61902e-05	0.000113742	0.071753	0.054637	0.090713
Esophagus_Gastroesophageal_Junction	ENSG00000168653.10	NDUFS5	chr1	39026318	39034636	+	6847	1.04772	889.697	244.143	5.07221e-67	chr1_39026790_C_T_b38	472	chr1	39026790	C	T	1	rs3768324	162	196	0.29697	1	2.8476e-75	-0.614119	0.0238413	9.999e-05	4.1923e-67	4.82203e-65	7.82478e-05	-0.51462	-0.542903	-0.468229
Esophagus_Gastroesophageal_Junction	ENSG00000085832.16	EPS15	chr1	51354263	51519328	-	4443	1.05066	243.809	236.959	1.60878e-20	chr1_51370670_G_A_b38	-148658	chr1	51370670	G	A	1	rs148648502	38	39	0.0590909	1	1.4552e-23	0.738412	0.0671319	9.999e-05	5.03566e-19	3.24981e-18	0.00028809	0.371903	0.309796	0.441482
Esophagus_Gastroesophageal_Junction	ENSG00000134184.12	GSTM1	chr1	109687814	109693745	+	6623	1.03981	954.315	245.687	2.42624e-13	chr1_109675302_G_A_b38	-12512	chr1	109675302	G	A	1	rs611951	90	98	0.148485	-1	9.31385e-15	-0.855795	0.104375	9.999e-05	9.40789e-11	3.05745e-10	7.11741e-05	-4.88075	-5.5716	-4.27743
Esophagus_Gastroesophageal_Junction	ENSG00000007933.12	FMO3	chr1	171090877	171117819	+	7905	1.05852	593.775	236.838	2.12253e-08	chr1_171095563_A_G_b38	4686	chr1	171095563	A	G	1	rs28363527	142	159	0.240909	1	1.56975e-09	-0.422381	0.0675952	9.999e-05	6.34667e-06	1.21258e-05	0.00012119	-0.571818	-0.760714	-0.392056
Esophagus_Gastroesophageal_Junction	ENSG00000023228.13	NDUFS1	chr2	206114817	206159584	-	6870	1.05111	901.667	242.773	2.4891e-17	chr2_206121904_T_C_b38	-37680	chr2	206121904	T	C	1	rs1564163	244	328	0.49697	1	1.9876e-19	-0.177	0.0181863	9.999e-05	4.40369e-15	2.09502e-14	7.80212e-05	-0.162814	-0.184943	-0.144067
Esophagus_Gastroesophageal_Junction	ENSG00000130414.11	NDUFA10	chr2	239892450	240025402	-	10077	1.03169	1686.08	251.219	3.06159e-27	chr2_239959194_A_AT_b38	-66208	chr2	239959194	A	AT	1	rs138899326	79	85	0.128788	1	1.14723e-29	-0.767181	0.0600368	9.999e-05	9.30991e-25	8.57103e-24	3.92656e-05	-0.355513	-0.443347	-0.298618
Esophagus_Gastroesophageal_Junction	ENSG00000180767.9	CHST13	chr3	126524283	126543291	+	9352	1.03513	822.207	243.821	1.04451e-29	chr3_126528355_T_A_b38	4072	chr3	126528355	T	A	1	rs3856650	230	300	0.454545	1	2.67808e-33	-0.760106	0.0550545	9.999e-05	1.02699e-27	1.10962e-26	8.14012e-05	-2.22745	-2.41193	-1.90971
Esophagus_Gastroesophageal_Junction	ENSG00000114770.16	ABCC5	chr3	183919934	184018015	-	7604	1.03133	998.194	244.814	6.95909e-14	chr3_184039634_T_G_b38	21619	chr3	184039634	T	G	1	rs36002288	143	164	0.248485	1	2.05848e-15	0.389504	0.0462411	9.999e-05	3.29347e-11	1.11875e-10	6.62475e-05	0.331513	0.272647	0.384447
Esophagus_Gastroesophageal_Junction	ENSG00000109390.11	NDUFC1	chr4	139289917	139302551	-	6947	1.05668	1014.31	245.634	1.987e-07	chr4_139494003_G_C_b38	191452	chr4	139494003	G	C	1	rs11730829	228	310	0.469697	-1	3.72872e-08	-0.175061	0.0309095	0.00019998	0.000121344	0.000193373	7.0551e-05	-0.088553	-0.120518	-0.059716
Esophagus_Gastroesophageal_Junction	ENSG00000133710.15	SPINK5	chr5	148025683	148137289	+	7805	1.03268	930.91	249.098	1.34764e-09	chr5_148086066_T_C_b38	60383	chr5	148086066	T	C	1	rs1363724	196	244	0.369697	-1	1.89561e-10	-0.443017	0.0669385	9.999e-05	7.93427e-07	1.69041e-06	7.13408e-05	-1.36003	-1.83008	-1.18843
Esophagus_Gastroesophageal_Junction	ENSG00000123545.5	NDUFAF4	chr6	96889313	96897881	-	7110	1.04685	543.396	241.632	1.03742e-21	chr6_96856559_C_G_b38	-41322	chr6	96856559	C	G	1	rs1359930	77	77	0.116667	-1	1.71689e-24	-0.489082	0.0433748	9.999e-05	7.71309e-20	5.21475e-19	0.000127764	-0.421456	-0.472566	-0.367538
Esophagus_Gastroesophageal_Junction	ENSG00000164638.10	SLC29A4	chr7	5274369	5306789	+	10514	1.03234	1411.04	244.559	1.02121e-15	chr7_5271688_T_C_b38	-2681	chr7	5271688	T	C	1	rs4724493	169	201	0.304545	-1	1.73964e-17	-0.521237	0.0572068	9.999e-05	5.88325e-13	2.33957e-12	4.7016e-05	-0.840475	-1.01781	-0.64063
Esophagus_Gastroesophageal_Junction	ENSG00000128609.14	NDUFA5	chr7	123536997	123558255	-	6874	1.05528	442.201	236.436	1.46338e-20	chr7_123410271_T_C_b38	-147984	chr7	123410271	T	C	1	rs28459174	100	110	0.166667	1	1.16526e-23	-0.345932	0.0313678	9.999e-05	7.08434e-19	4.51107e-18	0.000161125	-0.267338	-0.330473	-0.237079
Esophagus_Gastroesophageal_Junction	ENSG00000090266.12	NDUFB2	chr7	140696821	140706646	+	6210	1.02802	769.955	243.324	2.16958e-07	chr7_140696918_G_A_b38	97	chr7	140696918	G	A	1	rs113951414	14	14	0.0212121	1	3.54873e-08	-0.556792	0.0981452	0.00029997	0.00012934	0.000205359	8.49823e-05	-0.467878	-0.621315	-0.315039
Esophagus_Gastroesophageal_Junction	ENSG00000254087.7	LYN	chr8	55879813	56014168	+	7973	1.04273	655.003	240.168	9.61239e-16	chr8_55880680_A_G_b38	867	chr8	55880680	A	G	1	rs6983130	134	152	0.230303	1	8.28863e-18	0.376079	0.0408078	9.999e-05	1.86042e-13	7.73685e-13	0.000104647	0.368583	0.304992	0.464294
Esophagus_Gastroesophageal_Junction	ENSG00000174775.16	HRAS	chr11	532242	537287	-	6400	1.05747	823.858	242.29	7.38181e-16	chr11_548451_T_TTTTGTTTG_b38	11164	chr11	548451	T	TTTTGTTTG	1	rs71462096	132	149	0.254266	1	8.53408e-18	-0.282745	0.0306939	9.999e-05	1.17743e-13	4.97161e-13	8.70685e-05	-0.198866	-0.234762	-0.15887
Esophagus_Gastroesophageal_Junction	ENSG00000187486.5	KCNJ11	chr11	17385859	17389331	-	6662	1.02052	737.495	244.922	1.76402e-20	chr11_17386704_G_A_b38	-2627	chr11	17386704	G	A	1	rs5210	208	263	0.398485	1	8.37252e-23	0.49672	0.0461152	9.999e-05	5.80728e-18	3.46935e-17	8.66067e-05	1.02235	0.861304	1.2023
Esophagus_Gastroesophageal_Junction	ENSG00000006071.12	ABCC8	chr11	17392885	17476845	-	6843	1.01816	794.084	247.728	4.53911e-17	chr11_17476510_G_A_b38	-335	chr11	17476510	G	A	1	rs77889556	98	110	0.166667	1	8.82132e-19	0.496772	0.0521392	9.999e-05	2.03852e-14	9.16091e-14	7.98215e-05	1.18833	0.968644	1.37726
Esophagus_Gastroesophageal_Junction	ENSG00000167792.11	NDUFV1	chr11	67606852	67612535	+	6269	1.05084	497.804	233.75	3.37446e-10	chr11_67591619_C_G_b38	-15233	chr11	67591619	C	G	1	rs7939505	207	258	0.390909	1	9.54142e-12	0.259115	0.0364024	9.999e-05	7.43356e-08	1.79884e-07	0.000141194	0.120048	0.098335	0.151277
Esophagus_Gastroesophageal_Junction	ENSG00000110717.12	NDUFS8	chr11	68030627	68036644	+	7034	1.03977	570.855	236.221	1.59395e-07	chr11_68030894_G_GCC_b38	267	chr11	68030894	G	GCC	1	rs746745849	130	144	0.218182	1	1.54866e-08	0.172794	0.0296377	9.999e-05	6.17689e-05	0.000103043	0.000118964	0.103671	0.06653	0.141791
Esophagus_Gastroesophageal_Junction	ENSG00000151366.12	NDUFC2	chr11	78068352	78080219	-	7061	1.04704	685.032	240.088	5.54765e-09	chr11_78061219_G_T_b38	-19000	chr11	78061219	G	T	1	rs622757	156	190	0.287879	-1	4.37133e-10	0.212919	0.0328886	9.999e-05	2.06976e-06	4.20367e-06	0.00010141	0.105705	0.075369	0.132536
Esophagus_Gastroesophageal_Junction	ENSG00000137806.8	NDUFAF1	chr15	41387349	41402519	-	6332	1.03694	497.799	238.611	5.68523e-11	chr15_41491616_A_G_b38	89097	chr15	41491616	A	G	1	rs1757463	190	226	0.342424	1	1.99811e-12	-0.251721	0.0341526	9.999e-05	1.46562e-08	3.8258e-08	0.000135214	-0.18305	-0.225501	-0.160005
Esophagus_Gastroesophageal_Junction	ENSG00000167720.12	SRR	chr17	2303383	2325260	+	8461	1.02024	1543.79	251.824	1.89093e-55	chr17_2304032_G_A_b38	649	chr17	2304032	G	A	1	rs3744270	168	198	0.3	1	2.14546e-60	-0.687332	0.0321565	9.999e-05	2.622e-53	1.27408e-51	4.13372e-05	-0.767825	-0.833296	-0.694427
Esophagus_Gastroesophageal_Junction	ENSG00000142494.13	SLC47A1	chr17	19495385	19579034	+	4687	1.02053	501.038	246.184	3.54999e-12	chr17_19533874_T_C_b38	38489	chr17	19533874	T	C	1	rs2252281	171	201	0.355124	1	1.97431e-13	-0.448062	0.0579311	9.999e-05	1.16584e-09	3.40411e-09	0.00012748	-1.19514	-1.65895	-0.89666
Esophagus_Gastroesophageal_Junction	ENSG00000171298.12	GAA	chr17	80101556	80119879	+	9997	1.03927	2093.3	255.194	5.65752e-36	chr17_80101663_G_C_b38	107	chr17	80101663	G	C	1	rs2304849	130	143	0.216667	1	1.22764e-38	-0.821298	0.0536955	9.999e-05	6.49166e-34	9.84767e-33	3.23936e-05	-0.49198	-0.575702	-0.438868
Esophagus_Gastroesophageal_Junction	ENSG00000176105.13	YES1	chr18	721588	812546	-	7891	1.04823	1054.14	241.86	2.06943e-08	chr18_693977_G_A_b38	-118569	chr18	693977	G	A	1	rs2305995	142	166	0.251515	1	2.25093e-09	0.19621	0.0317279	9.999e-05	1.27282e-05	2.32851e-05	6.61463e-05	0.162694	0.122592	0.197533
Esophagus_Gastroesophageal_Junction	ENSG00000174886.12	NDUFA11	chr19	5891276	5904006	-	8886	1.03921	1669.02	252.307	5.3084e-11	chr19_5932837_G_A_b38	28831	chr19	5932837	G	A	1	rs121742	183	206	0.312121	-1	7.3173e-12	0.234885	0.0327991	9.999e-05	4.60733e-08	1.13826e-07	4.06205e-05	0.124459	0.077082	0.156246
Esophagus_Gastroesophageal_Junction	ENSG00000170906.15	NDUFA3	chr19	54102728	54109257	+	12746	1.03259	2323.86	248.386	5.22759e-38	chr19_54108427_A_G_b38	5699	chr19	54108427	A	G	1	rs75622830	69	72	0.109091	1	6.6709e-42	0.802671	0.0495479	9.999e-05	9.39779e-36	1.56114e-34	2.8571e-05	0.497309	0.433503	0.546071
Esophagus_Gastroesophageal_Junction	ENSG00000160194.17	NDUFV3	chr21	42879644	42913304	+	8344	1.05352	1255.38	246.292	2.22869e-33	chr21_42903610_C_T_b38	23966	chr21	42903610	C	T	1	rs4148974	33	35	0.0530303	1	4.4566e-37	-0.97226	0.0654184	9.999e-05	7.15995e-32	9.87255e-31	5.64556e-05	-0.800544	-1.01351	-0.69394
Esophagus_Gastroesophageal_Junction	ENSG00000100191.5	SLC5A4	chr22	32218476	32255341	-	8455	1.07041	761.481	237.429	1.24248e-18	chr22_32353798_TAC_T_b38	98457	chr22	32353798	TAC	T	1	rs139145314	37	37	0.0560606	1	2.4553e-21	1.25008	0.12107	9.999e-05	8.02672e-17	4.37529e-16	9.79472e-05	2.16605	1.92369	2.36447
Esophagus_Gastroesophageal_Junction	ENSG00000184983.9	NDUFA6	chr22	42085525	42090930	-	7183	1.03066	547.876	239.121	9.68073e-37	chr22_42084417_G_A_b38	-6513	chr22	42084417	G	A	1	rs139043947	22	23	0.0348485	1	5.27632e-42	0.936613	0.0577156	9.999e-05	4.99438e-35	7.93396e-34	0.000120437	0.714976	0.634088	0.781433
Esophagus_Gastroesophageal_Junction	ENSG00000100197.20	CYP2D6	chr22	42126499	42130906	-	7271	1.07021	558.124	234.515	2.22097e-22	chr22_42142389_T_C_b38	11483	chr22	42142389	T	C	1	rs36093924	236	304	0.460606	-1	5.69453e-26	0.561376	0.0479349	9.999e-05	5.65234e-21	4.15206e-20	0.000133551	0.767748	0.626044	0.86993
Esophagus_Gastroesophageal_Junction	ENSG00000147123.10	NDUFB11	chrX	47142216	47144868	-	3948	1.03583	497.126	249.769	2.03402e-07	chrX_47100721_C_T_b38	-44147	chrX	47100721	C	T	1	rs5906330	153	263	0.398485	-1	4.95733e-08	0.166596	0.029702	9.999e-05	7.16032e-05	0.00011819	0.000134924	0.081834	0.053622	0.102201
Esophagus_Gastroesophageal_Junction	ENSG00000072506.12	HSD17B10	chrX	53431258	53434373	-	2292	1.02912	326.843	251.287	1.05953e-08	chrX_53352900_C_T_b38	-81473	chrX	53352900	C	T	1	rs2480441	171	283	0.428788	-1	2.16028e-09	-0.109946	0.0177575	9.999e-05	2.37138e-06	4.78418e-06	0.000200884	-0.087383	-0.108649	-0.059116
Esophagus_Mucosa	ENSG00000198793.12	MTOR	chr1	11106535	11262507	-	7857	1.05128	1168.21	380.401	4.89763e-09	chr1_11262099_A_G_b38	-408	chr1	11262099	A	G	1	rs1883965	246	303	0.304829	-1	5.68038e-10	-0.137602	0.0216865	9.999e-05	3.01222e-06	2.68802e-06	0.000126567	-0.083961	-0.100236	-0.062725
Esophagus_Mucosa	ENSG00000168653.10	NDUFS5	chr1	39026318	39034636	+	6847	1.03619	982.773	384.654	2.16541e-106	chr1_39026790_C_T_b38	472	chr1	39026790	C	T	1	rs3768324	238	279	0.280684	1	6.6944e-118	-0.589219	0.0180783	9.999e-05	4.02959e-107	4.26524e-105	0.000144906	-0.453972	-0.475777	-0.413509
Esophagus_Mucosa	ENSG00000085832.16	EPS15	chr1	51354263	51519328	-	4443	1.07241	236.232	355.309	2.70994e-13	chr1_51370670_G_A_b38	-148658	chr1	51370670	G	A	1	rs148648502	50	50	0.0503018	1	1.12455e-15	0.480334	0.057674	9.999e-05	1.13295e-11	1.61214e-11	0.000658451	0.244716	0.198854	0.279683
Esophagus_Mucosa	ENSG00000162692.10	VCAM1	chr1	100719742	100739045	+	7352	1.0516	623.026	373.959	3.17183e-08	chr1_100725310_A_C_b38	5568	chr1	100725310	A	C	1	rs3917010	190	207	0.208249	1	3.39087e-09	-0.197888	0.032773	9.999e-05	1.10472e-05	9.30756e-06	0.000237489	-0.539364	-0.707602	-0.386633
Esophagus_Mucosa	ENSG00000134184.12	GSTM1	chr1	109687814	109693745	+	6623	1.04332	1060.69	385.53	8.34674e-11	chr1_109675302_G_A_b38	-12512	chr1	109675302	G	A	1	rs611951	125	138	0.138833	-1	8.20048e-12	-0.610897	0.0868914	9.999e-05	4.29869e-08	4.59848e-08	0.000136678	-5.11999	-5.79806	-4.31337
Esophagus_Mucosa	ENSG00000131781.12	FMO5	chr1	147175351	147243050	-	6443	1.04089	664.287	374.782	6.68799e-14	chr1_147225363_C_G_b38	-17687	chr1	147225363	C	G	1	rs2289575	364	490	0.492958	1	1.2489e-15	0.280724	0.0337652	9.999e-05	1.64685e-11	2.315e-11	0.00021691	0.321119	0.235794	0.408228
Esophagus_Mucosa	ENSG00000198929.12	NOS1AP	chr1	162069774	162370475	+	7637	1.02327	960.475	380.724	3.11395e-09	chr1_162381796_G_A_b38	312022	chr1	162381796	G	A	1	rs901662	183	201	0.202213	1	3.48054e-10	0.402349	0.0626015	9.999e-05	2.20258e-06	1.99085e-06	0.000143479	0.559875	0.422289	0.657552
Esophagus_Mucosa	ENSG00000007933.12	FMO3	chr1	171090877	171117819	+	7905	1.03397	669.372	375.428	1.51616e-11	chr1_171086976_C_G_b38	-3901	chr1	171086976	C	G	1	rs6608460	266	312	0.313883	1	6.22892e-13	0.375233	0.0505456	9.999e-05	5.35189e-09	6.16923e-09	0.000211555	0.550152	0.426655	0.712645
Esophagus_Mucosa	ENSG00000094963.13	FMO2	chr1	171185208	171211230	+	7658	1.02093	630.393	373.615	7.50539e-15	chr1_171168633_C_A_b38	-16575	chr1	171168633	C	A	1	rs7887919	64	69	0.0694165	1	9.30499e-17	-0.56636	0.0653484	9.999e-05	2.71704e-12	4.0687e-12	0.000217285	-1.21174	-1.65381	-0.771891
Esophagus_Mucosa	ENSG00000242515.5	UGT1A10	chr2	233636454	233637377	+	8567	1.04297	1427.52	388.71	1.30124e-10	chr2_233635253_G_C_b38	-1201	chr2	233635253	G	C	1	rs2741032	182	212	0.21328	-1	1.62215e-11	0.377125	0.0544681	9.999e-05	9.366e-08	9.69931e-08	0.00010147	1.13763	0.798952	1.41949
Esophagus_Mucosa	ENSG00000130414.11	NDUFA10	chr2	239892450	240025402	-	10077	1.03685	1751.84	387.73	8.3337e-35	chr2_240017565_G_A_b38	-7837	chr2	240017565	G	A	1	rs6732752	128	136	0.136821	1	3.67258e-38	-0.593787	0.0415357	9.999e-05	1.04986e-32	4.92547e-32	8.14295e-05	-0.325278	-0.359231	-0.276905
Esophagus_Mucosa	ENSG00000065518.7	NDUFB4	chr3	120596309	120602500	+	6840	1.04802	419.136	365.358	9.06469e-09	chr3_120573730_C_T_b38	-22579	chr3	120573730	C	T	1	rs6796980	169	196	0.197183	1	5.1679e-10	0.18124	0.0284927	9.999e-05	2.0433e-06	1.85299e-06	0.000349891	0.10344	0.07956	0.133848
Esophagus_Mucosa	ENSG00000180767.9	CHST13	chr3	126524283	126543291	+	9352	1.02657	832.629	379.181	9.49097e-17	chr3_126528952_C_T_b38	4669	chr3	126528952	C	T	1	rs11717719	340	464	0.466801	-1	1.14336e-18	0.453211	0.049031	9.999e-05	3.50438e-14	6.03055e-14	0.000166912	1.37903	1.16403	1.59995
Esophagus_Mucosa	ENSG00000051382.8	PIK3CB	chr3	138652699	138834938	-	5811	1.06076	538.9	372.27	4.07157e-12	chr3_138858869_C_T_b38	23931	chr3	138858869	C	T	1	rs9822500	350	464	0.466801	-1	1.10591e-13	0.181899	0.0236884	9.999e-05	6.36055e-10	7.92551e-10	0.000280756	0.117274	0.082703	0.14116
Esophagus_Mucosa	ENSG00000136521.12	NDUFB5	chr3	179604702	179627647	+	6792	1.05807	585.728	367.85	2.35042e-13	chr3_179567937_G_A_b38	-36765	chr3	179567937	G	A	1	rs12696481	367	492	0.49497	1	2.90146e-15	-0.178848	0.0218181	9.999e-05	3.58999e-11	4.91593e-11	0.000256634	-0.099665	-0.119541	-0.079525
Esophagus_Mucosa	ENSG00000114770.16	ABCC5	chr3	183919934	184018015	-	7604	1.04993	1003.1	377.013	3.20754e-28	chr3_184020672_A_C_b38	2657	chr3	184020672	A	C	1	rs2872246	342	436	0.438632	-1	9.57866e-32	-0.365141	0.028655	9.999e-05	1.88418e-26	6.55587e-26	0.000146909	-0.310964	-0.349317	-0.272008
Esophagus_Mucosa	ENSG00000109390.11	NDUFC1	chr4	139289917	139302551	-	6947	1.05002	1013.25	378.316	3.82788e-43	chr4_139405317_T_A_b38	102766	chr4	139405317	T	A	1	rs17050764	232	276	0.277666	1	1.7832e-48	0.440806	0.026422	9.999e-05	4.05482e-42	2.88152e-41	0.000145469	0.255465	0.227899	0.280938
Esophagus_Mucosa	ENSG00000164258.11	NDUFS4	chr5	53560633	53683340	+	8298	1.0408	773.127	377.43	2.87217e-08	chr5_53633275_A_C_b38	72642	chr5	53633275	A	C	1	rs72753647	155	173	0.174044	1	3.57683e-09	0.14309	0.0237344	9.999e-05	1.40891e-05	1.17361e-05	0.000186335	0.092423	0.063529	0.131951
Esophagus_Mucosa	ENSG00000123545.5	NDUFAF4	chr6	96889313	96897881	-	7110	1.06679	503.487	366.38	1.51961e-08	chr6_96787949_A_T_b38	-109932	chr6	96787949	A	T	1	rs850436	139	144	0.144869	1	9.9507e-10	0.210725	0.0337159	0.00019998	3.38197e-06	2.9967e-06	0.000304898	0.183789	0.129969	0.225907
Esophagus_Mucosa	ENSG00000146477.5	SLC22A3	chr6	160348268	160452581	+	8277	1.03175	869.986	377.232	6.49726e-12	chr6_160447295_A_G_b38	99027	chr6	160447295	A	G	1	rs2457575	217	254	0.255533	1	2.71371e-13	-0.34525	0.045746	9.999e-05	3.05099e-09	3.58474e-09	0.000161865	-0.387477	-0.444288	-0.310752
Esophagus_Mucosa	ENSG00000090266.12	NDUFB2	chr7	140696821	140706646	+	6210	1.06351	832.269	376.825	8.90745e-17	chr7_140696918_G_A_b38	97	chr7	140696918	G	A	1	rs113951414	22	22	0.0221328	1	8.31613e-19	-0.763375	0.0822234	9.999e-05	1.05652e-14	1.88367e-14	0.000183017	-0.481426	-0.563859	-0.386158
Esophagus_Mucosa	ENSG00000254087.7	LYN	chr8	55879813	56014168	+	7973	1.04773	723.605	376.794	3.7607e-10	chr8_55884171_C_G_b38	4358	chr8	55884171	C	G	1	rs139862376	76	80	0.0804829	1	2.58573e-11	0.289003	0.0421899	9.999e-05	1.29514e-07	1.31993e-07	0.000202543	0.462397	0.376062	0.623846
Esophagus_Mucosa	ENSG00000165078.12	CPA6	chr8	67422038	67746385	-	6040	1.03979	619.558	371.978	1.4136e-09	chr8_67740083_T_A_b38	-6302	chr8	67740083	T	A	1	rs2623837	215	251	0.252515	-1	8.76867e-11	0.302701	0.0454917	9.999e-05	4.94169e-07	4.76656e-07	0.000231929	0.933271	0.649087	1.35999
Esophagus_Mucosa	ENSG00000164756.12	SLC30A8	chr8	116950273	117176714	+	6273	1.02187	804.508	385.999	1.29536e-08	chr8_117003664_T_G_b38	53391	chr8	117003664	T	G	1	rs1995581	334	424	0.426559	1	2.21169e-09	0.354893	0.0580587	9.999e-05	8.03299e-06	6.86386e-06	0.000170677	1.39472	0.962329	1.7415
Esophagus_Mucosa	ENSG00000119421.6	NDUFA8	chr9	122144058	122159819	-	7028	1.03841	814.792	375.147	1.21678e-07	chr9_122159067_C_A_b38	-752	chr9	122159067	C	A	1	rs12335926	12	12	0.0120724	1	1.64952e-08	0.606245	0.10533	9.999e-05	6.84218e-05	5.23275e-05	0.000175754	0.365664	0.289978	0.456851
Esophagus_Mucosa	ENSG00000165841.9	CYP2C19	chr10	94762624	94853260	+	7164	1.04609	518.29	370.206	2.92707e-39	chr10_94735111_T_TTC_b38	-27513	chr10	94735111	T	TTC	1	rs10692158	151	165	0.165996	1	5.0539e-45	0.654239	0.0411604	9.999e-05	3.32265e-38	1.99625e-37	0.000281618	1.07199	0.944012	1.19844
Esophagus_Mucosa	ENSG00000138115.13	CYP2C8	chr10	95036772	95069497	-	7085	1.04455	432.372	363.899	2.70031e-10	chr10_95237678_T_C_b38	168181	chr10	95237678	T	C	1	rs4235	210	246	0.247485	-1	7.8415e-12	-0.454104	0.0645258	9.999e-05	5.62339e-08	5.94286e-08	0.000336281	-0.627679	-0.757628	-0.482353
Esophagus_Mucosa	ENSG00000174775.16	HRAS	chr11	532242	537287	-	6400	1.07972	767.323	369.57	4.95155e-11	chr11_526184_G_C_b38	-11103	chr11	526184	G	C	1	rs34755674	99	106	0.10664	1	1.60321e-12	-0.22802	0.0313156	9.999e-05	9.38977e-09	1.05832e-08	0.00020632	-0.214057	-0.262277	-0.160944
Esophagus_Mucosa	ENSG00000187486.5	KCNJ11	chr11	17385859	17389331	-	6662	1.03952	705.512	374.282	1.04113e-39	chr11_17383105_G_A_b38	-6226	chr11	17383105	G	A	1	rs10766393	230	269	0.270624	1	4.60793e-45	0.796321	0.0500703	9.999e-05	2.69589e-38	1.63141e-37	0.000203539	1.61669	1.44752	1.74327
Esophagus_Mucosa	ENSG00000006071.12	ABCC8	chr11	17392885	17476845	-	6843	1.04798	686.136	371.165	8.26389e-10	chr11_17476510_G_A_b38	-335	chr11	17476510	G	A	1	rs77889556	146	161	0.161972	1	4.51872e-11	0.467453	0.06914	9.999e-05	2.78476e-07	2.74085e-07	0.000213734	0.970826	0.727028	1.21942
Esophagus_Mucosa	ENSG00000137491.14	SLCO2B1	chr11	75100563	75206549	+	6016	1.02697	641.05	377.149	9.14175e-15	chr11_75152238_T_A_b38	51675	chr11	75152238	T	A	1	rs2712810	169	182	0.183099	-1	1.6156e-16	-0.420441	0.0489303	9.999e-05	2.88337e-12	4.30922e-12	0.00021701	-0.616054	-0.742801	-0.48646
Esophagus_Mucosa	ENSG00000151366.12	NDUFC2	chr11	78068352	78080219	-	7061	1.03308	671.537	372.374	2.57991e-10	chr11_78057105_A_G_b38	-23114	chr11	78057105	A	G	1	rs6592763	146	165	0.165996	-1	1.28289e-11	0.235531	0.0338375	9.999e-05	1.02048e-07	1.05228e-07	0.000210399	0.156696	0.113965	0.191831
Esophagus_Mucosa	ENSG00000070961.15	ATP2B1	chr12	89588049	89708831	-	5326	1.03503	606.78	381.141	1.86053e-07	chr12_90001084_A_T_b38	292253	chr12	90001084	A	T	1	rs4408360	319	399	0.401408	1	3.43196e-08	-0.179708	0.0319704	9.999e-05	8.08663e-05	6.13471e-05	0.000233999	-0.127326	-0.176671	-0.092716
Esophagus_Mucosa	ENSG00000111199.10	TRPV4	chr12	109783085	109832735	-	5509	1.03141	537.325	372.666	1.8362e-09	chr12_109834094_C_T_b38	1359	chr12	109834094	C	T	1	rs10850830	361	464	0.466801	1	1.23021e-10	-0.188834	0.0286162	9.999e-05	6.30446e-07	6.01279e-07	0.000261835	-0.311491	-0.40763	-0.22856
Esophagus_Mucosa	ENSG00000089250.18	NOS1	chr12	117208142	117452170	-	7654	1.05771	1125.55	377.013	3.45892e-09	chr12_117349749_G_T_b38	-102421	chr12	117349749	G	T	1	rs4766845	173	190	0.191147	1	3.21254e-10	-0.298518	0.0463502	9.999e-05	1.84966e-06	1.68651e-06	0.000133445	-0.727641	-0.933401	-0.511911
Esophagus_Mucosa	ENSG00000111725.10	PRKAB1	chr12	119667753	119681630	+	6702	1.03467	808.017	376.575	1.26632e-45	chr12_119671479_AGGCACCTCTTCACAGGAC_A_b38	3726	chr12	119671479	AGGCACCTCTTCACAGGAC	A	1	rs138621699	78	80	0.0804829	1	1.67396e-51	0.813873	0.0468595	9.999e-05	3.52955e-44	2.76199e-43	0.000175568	0.580069	0.529339	0.625492
Esophagus_Mucosa	ENSG00000168398.6	BDKRB2	chr14	96204679	96244166	+	8698	1.03848	1413.34	386.99	3.33625e-13	chr14_96255017_G_T_b38	50338	chr14	96255017	G	T	1	rs60531722	99	105	0.105634	1	2.04731e-14	-0.42985	0.0542601	9.999e-05	2.02938e-10	2.62858e-10	0.000101345	-0.334358	-0.406518	-0.270519
Esophagus_Mucosa	ENSG00000137806.8	NDUFAF1	chr15	41387349	41402519	-	6332	1.03985	511.579	369.153	4.50574e-29	chr15_41491616_A_G_b38	89097	chr15	41491616	A	G	1	rs1757463	273	317	0.318913	1	2.26616e-33	-0.406255	0.0309101	9.999e-05	2.15495e-27	7.86542e-27	0.000280915	-0.316625	-0.361326	-0.269187
Esophagus_Mucosa	ENSG00000140990.14	NDUFB10	chr16	1959508	1961975	+	8673	1.03768	1339.15	380.328	1.45047e-13	chr16_1960180_G_C_b38	672	chr16	1960180	G	C	1	rs397460	149	167	0.168008	-1	4.77922e-15	0.259886	0.0319758	9.999e-05	8.22833e-11	1.09832e-10	0.000106745	0.156185	0.123609	0.182757
Esophagus_Mucosa	ENSG00000167720.12	SRR	chr17	2303383	2325260	+	8461	1.02792	1525.32	387.177	1.07556e-66	chr17_2304032_G_A_b38	649	chr17	2304032	G	A	1	rs3744270	260	310	0.311871	1	2.26353e-73	-0.788403	0.0354389	9.999e-05	2.86439e-65	5.08289e-64	9.14313e-05	-0.685109	-0.733602	-0.630058
Esophagus_Mucosa	ENSG00000179593.15	ALOX15B	chr17	8039017	8049134	+	7089	1.04325	1076.78	378.233	6.14415e-09	chr17_8043721_C_T_b38	4704	chr17	8043721	C	T	1	rs34015108	241	276	0.277666	1	6.54863e-10	0.285083	0.0451007	9.999e-05	3.87606e-06	3.41944e-06	0.000134613	0.437333	0.327747	0.523627
Esophagus_Mucosa	ENSG00000142494.13	SLC47A1	chr17	19495385	19579034	+	4687	1.04877	478.361	374.125	1.61006e-26	chr17_19535008_T_C_b38	39623	chr17	19535008	T	C	1	rs2453580	318	396	0.39839	1	4.879e-30	-0.517143	0.0419885	9.999e-05	5.6258e-25	1.83175e-24	0.000307148	-0.669784	-0.772207	-0.580267
Esophagus_Mucosa	ENSG00000180638.17	SLC47A2	chr17	19678288	19718979	-	4848	1.06426	495.648	371.561	5.41577e-08	chr17_19716128_G_C_b38	-2851	chr17	19716128	G	C	1	rs4925045	248	282	0.283702	1	5.57196e-09	0.257179	0.0432187	9.999e-05	1.32666e-05	1.10769e-05	0.000307842	0.476544	0.349691	0.673667
Esophagus_Mucosa	ENSG00000171298.12	GAA	chr17	80101556	80119879	+	9997	1.07518	1607.96	374.657	1.12982e-81	chr17_80102793_A_C_b38	1237	chr17	80102793	A	C	1	rs12450199	307	390	0.392354	1	7.85311e-93	-0.848557	0.03185	9.999e-05	2.5136e-84	9.02702e-83	9.74143e-05	-0.786646	-0.841178	-0.736944
Esophagus_Mucosa	ENSG00000176105.13	YES1	chr18	721588	812546	-	7891	1.03712	1226.72	385.061	8.20403e-10	chr18_812169_G_A_b38	-377	chr18	812169	G	A	1	rs111542039	90	94	0.0945674	1	9.98904e-11	-0.216677	0.0326675	9.999e-05	5.93166e-07	5.67338e-07	0.000116363	-0.167951	-0.215264	-0.123283
Esophagus_Mucosa	ENSG00000178127.12	NDUFV2	chr18	9102630	9134345	+	9030	1.03976	1643.95	389.043	3.68239e-08	chr18_9091855_T_G_b38	-10775	chr18	9091855	T	G	1	rs12969399	291	352	0.354125	1	8.01754e-09	0.137106	0.0232942	9.999e-05	4.04356e-05	3.18238e-05	8.74089e-05	0.077824	0.048232	0.093336
Esophagus_Mucosa	ENSG00000118046.14	STK11	chr19	1177558	1228286	+	9943	1.05573	2772.28	397.195	7.15553e-08	chr19_1209715_C_G_b38	32157	chr19	1209715	C	G	1	rs8111699	356	477	0.479879	1	2.32451e-08	-0.111128	0.0195202	9.999e-05	0.000120351	8.92146e-05	5.3921e-05	-0.07416	-0.09331	-0.056096
Esophagus_Mucosa	ENSG00000174886.12	NDUFA11	chr19	5891276	5904006	-	8886	1.03432	1464.15	381.225	9.20132e-37	chr19_5892943_T_C_b38	-11063	chr19	5892943	T	C	1	rs1678868	324	420	0.422535	1	5.64493e-41	0.34925	0.0233493	9.999e-05	9.8831e-35	5.09206e-34	9.68098e-05	0.239272	0.211978	0.264833
Esophagus_Mucosa	ENSG00000267855.5	NDUFA7	chr19	8308768	8321396	-	9066	1.01404	1425.74	384.863	1.29836e-07	chr19_8330219_G_A_b38	8823	chr19	8330219	G	A	1	rs2972576	171	188	0.189135	1	2.68358e-08	0.178449	0.0314917	0.00019998	0.000163071	0.000118681	9.4379e-05	0.107236	0.079404	0.146347
Esophagus_Mucosa	ENSG00000171051.8	FPR1	chr19	51745172	51804110	-	10609	1.04691	1776.32	384.727	5.87636e-08	chr19_51749765_A_G_b38	-54345	chr19	51749765	A	G	1	rs4802857	262	303	0.304829	-1	1.10982e-08	0.218495	0.0374938	9.999e-05	6.65131e-05	5.09388e-05	8.23476e-05	0.746601	0.52724	0.925841
Esophagus_Mucosa	ENSG00000170906.15	NDUFA3	chr19	54102728	54109257	+	12746	1.02669	2524.1	390.054	2.55561e-56	chr19_54108427_A_G_b38	5699	chr19	54108427	A	G	1	rs75622830	107	112	0.112676	1	1.73416e-61	0.767351	0.0391458	9.999e-05	2.57864e-54	3.03863e-53	5.50802e-05	0.45448	0.420917	0.502034
Esophagus_Mucosa	ENSG00000105618.13	PRPF31	chr19	54115676	54131719	+	12708	1.03833	2335.99	384.394	1.09092e-10	chr19_54122676_G_C_b38	7000	chr19	54122676	G	C	1	rs56220912	171	183	0.184105	-1	1.02825e-11	0.219213	0.0313372	9.999e-05	1.40054e-07	1.42135e-07	6.1295e-05	0.094481	0.065586	0.118513
Esophagus_Mucosa	ENSG00000160194.17	NDUFV3	chr21	42879644	42913304	+	8344	1.05754	1114.01	371.863	2.22341e-65	chr21_42903610_C_T_b38	23966	chr21	42903610	C	T	1	rs4148974	49	50	0.0503018	1	8.25337e-75	-1.53571	0.0680489	9.999e-05	6.89165e-66	1.2524e-64	0.000134771	-1.05518	-1.14895	-0.925966
Esophagus_Mucosa	ENSG00000100191.5	SLC5A4	chr22	32218476	32255341	-	8455	1.04461	791.884	370.081	7.12513e-12	chr22_32371551_A_G_b38	116210	chr22	32371551	A	G	1	rs5754035	55	57	0.0573441	1	1.78345e-13	0.742755	0.0976164	9.999e-05	2.37138e-09	2.81807e-09	0.000183656	1.25371	1.03178	1.43517
Esophagus_Mucosa	ENSG00000184983.9	NDUFA6	chr22	42085525	42090930	-	7183	1.05876	513.046	359.896	2.49475e-55	chr22_42090076_G_A_b38	-854	chr22	42090076	G	A	1	rs1989202	36	36	0.0362173	1	2.55572e-65	1.09649	0.0536057	9.999e-05	1.11396e-55	1.40928e-54	0.000293475	0.689417	0.644035	0.737117
Esophagus_Mucosa	ENSG00000100197.20	CYP2D6	chr22	42126499	42130906	-	7271	1.05093	581.393	366.13	2.56741e-81	chr22_42126611_C_G_b38	-4295	chr22	42126611	C	G	1	rs1135840	334	437	0.439638	-1	1.5514e-94	0.935444	0.0346017	9.999e-05	1.58781e-82	5.17826e-81	0.000254073	1.29775	1.21354	1.40098
Esophagus_Mucosa	ENSG00000186951.16	PPARA	chr22	46150521	46243756	+	9539	1.03451	1383	376.575	1.09886e-24	chr22_46143764_G_A_b38	-6757	chr22	46143764	G	A	1	rs135561	294	353	0.355131	1	8.93235e-28	0.301114	0.025648	9.999e-05	2.86284e-22	8.11295e-22	0.000102539	0.208966	0.181281	0.236171
Esophagus_Mucosa	ENSG00000147123.10	NDUFB11	chrX	47142216	47144868	-	3948	1.05399	519.971	383.393	2.49046e-09	chrX_47113320_G_A_b38	-31548	chrX	47113320	G	A	1	rs112633495	95	145	0.145875	1	3.12535e-10	-0.192025	0.0297941	9.999e-05	6.08244e-07	5.80839e-07	0.00028622	-0.113497	-0.14392	-0.082875
Esophagus_Mucosa	ENSG00000072506.12	HSD17B10	chrX	53431258	53434373	-	2292	1.03743	328.613	382.695	8.50457e-12	chrX_53354000_T_C_b38	-80373	chrX	53354000	T	C	1	rs10126337	269	447	0.449698	1	5.40182e-13	0.113797	0.0152852	9.999e-05	1.31566e-09	1.59747e-09	0.000434638	0.08187	0.062326	0.101196
Esophagus_Mucosa	ENSG00000125356.6	NDUFA1	chrX	119871828	119876662	+	4918	1.05671	674.668	376.763	7.34728e-12	chrX_119882731_C_G_b38	10903	chrX	119882731	C	G	1	rs2496235	222	362	0.364185	-1	3.0146e-13	0.126826	0.0168393	9.999e-05	1.6345e-09	1.96561e-09	0.000222071	0.088755	0.071232	0.10779
Esophagus_Muscularis	ENSG00000168653.10	NDUFS5	chr1	39026318	39034636	+	6847	1.01317	1042.64	361.363	1.22474e-117	chr1_39031147_G_A_b38	4829	chr1	39031147	G	A	1	rs10888639	244	286	0.307527	1	2.03823e-128	-0.663322	0.0182006	9.999e-05	4.01922e-116	7.08574e-114	0.000117048	-0.528761	-0.55719	-0.487155
Esophagus_Muscularis	ENSG00000085832.16	EPS15	chr1	51354263	51519328	-	4443	1.05408	240.494	333.783	1.46132e-27	chr1_51370670_G_A_b38	-148658	chr1	51370670	G	A	1	rs148648502	47	47	0.0505376	1	2.56373e-32	0.762455	0.0587595	9.999e-05	1.6335e-26	6.20053e-26	0.000564331	0.409892	0.359827	0.462373
Esophagus_Muscularis	ENSG00000134184.12	GSTM1	chr1	109687814	109693745	+	6623	1.04034	1072.06	357.795	1.66997e-19	chr1_109675302_G_A_b38	-12512	chr1	109675302	G	A	1	rs611951	124	136	0.146237	-1	2.27375e-21	-0.836916	0.0831388	9.999e-05	4.0743e-17	9.24499e-17	0.000122277	-4.65623	-5.10074	-3.80631
Esophagus_Muscularis	ENSG00000131781.12	FMO5	chr1	147175351	147243050	-	6443	1.07731	606.933	338.547	3.71574e-11	chr1_147225879_T_C_b38	-17171	chr1	147225879	T	C	1	rs2354431	334	457	0.491398	1	8.93334e-13	0.261517	0.0353963	9.999e-05	5.5846e-09	6.95791e-09	0.000236909	0.261635	0.206079	0.335463
Esophagus_Muscularis	ENSG00000158864.12	NDUFS2	chr1	161197104	161214395	+	7456	1.03171	870.299	350.968	7.18103e-08	chr1_161199375_G_T_b38	2271	chr1	161199375	G	T	1	rs3813623	98	101	0.108602	1	1.09735e-08	-0.296901	0.0508482	0.00019998	4.53495e-05	3.80209e-05	0.000147288	-0.157169	-0.197184	-0.111523
Esophagus_Muscularis	ENSG00000198929.12	NOS1AP	chr1	162069774	162370475	+	7637	1.05845	920.248	347.862	6.31039e-12	chr1_162085794_G_A_b38	16020	chr1	162085794	G	A	1	rs12022557	214	248	0.266667	1	2.4082e-13	0.233557	0.0307927	9.999e-05	1.86802e-09	2.42646e-09	0.000149152	0.53525	0.410561	0.637788
Esophagus_Muscularis	ENSG00000007933.12	FMO3	chr1	171090877	171117819	+	7905	1.05896	633.621	342.693	4.43864e-15	chr1_171099045_A_G_b38	8168	chr1	171099045	A	G	1	rs2204790	177	197	0.211828	1	3.76801e-17	-0.456667	0.0517867	9.999e-05	5.71149e-13	9.72342e-13	0.000216889	-0.661282	-0.816706	-0.544494
Esophagus_Muscularis	ENSG00000094963.13	FMO2	chr1	171185208	171211230	+	7658	1.02754	645.131	346.724	2.43254e-11	chr1_171168633_C_A_b38	-16575	chr1	171168633	C	A	1	rs7887919	63	66	0.0709677	1	1.0205e-12	-0.53728	0.07292	9.999e-05	9.45413e-09	1.15767e-08	0.00019653	-0.881692	-1.31868	-0.656565
Esophagus_Muscularis	ENSG00000023228.13	NDUFS1	chr2	206114817	206159584	-	6870	1.04476	903.001	347.496	3.28352e-26	chr2_206113220_G_T_b38	-46364	chr2	206113220	G	T	1	rs888085	337	453	0.487097	-1	1.4275e-29	-0.186833	0.0152178	9.999e-05	2.85204e-24	9.71081e-24	0.000146824	-0.139988	-0.162027	-0.123911
Esophagus_Muscularis	ENSG00000130414.11	NDUFA10	chr2	239892450	240025402	-	10077	1.02504	1819.76	361.556	2.68294e-41	chr2_240022777_C_A_b38	-2625	chr2	240022777	C	A	1	rs11679609	263	312	0.335484	1	5.82956e-45	-0.535476	0.0333764	9.999e-05	5.61711e-39	3.73689e-38	6.92206e-05	-0.259427	-0.282803	-0.231057
Esophagus_Muscularis	ENSG00000142330.19	CAPN10	chr2	240586716	240617705	+	9651	1.01021	1471.54	358.007	4.90311e-10	chr2_240587445_C_T_b38	729	chr2	240587445	C	T	1	rs67448739	135	146	0.156989	1	6.31167e-11	-0.195004	0.0290125	9.999e-05	6.218e-07	6.36509e-07	8.22746e-05	-0.143862	-0.17599	-0.109867
Esophagus_Muscularis	ENSG00000157017.15	GHRL	chr3	10285747	10291451	-	7468	1.04319	1194.65	353.726	1.49719e-09	chr3_10253998_G_A_b38	-37453	chr3	10253998	G	A	1	rs419211	304	406	0.436559	1	1.67996e-10	0.323086	0.0492434	9.999e-05	9.9106e-07	9.91633e-07	0.000110537	0.499834	0.376815	0.715242
Esophagus_Muscularis	ENSG00000180767.9	CHST13	chr3	126524283	126543291	+	9352	1.0421	863.794	351.025	2.26185e-41	chr3_126530422_G_A_b38	6139	chr3	126530422	G	A	1	rs744233	226	259	0.278495	1	2.42407e-46	-0.756257	0.0462005	9.999e-05	4.95645e-40	3.39341e-39	0.000152444	-2.83697	-3.17465	-2.52536
Esophagus_Muscularis	ENSG00000114770.16	ABCC5	chr3	183919934	184018015	-	7604	1.02491	1025.06	352.337	1.74869e-22	chr3_184039634_T_G_b38	21619	chr3	184039634	T	G	1	rs36002288	202	236	0.253763	1	5.15886e-25	0.402364	0.0363265	9.999e-05	6.05175e-20	1.61856e-19	0.000122839	0.308168	0.268205	0.365639
Esophagus_Muscularis	ENSG00000109390.11	NDUFC1	chr4	139289917	139302551	-	6947	1.03969	1152.91	358.142	2.82713e-11	chr4_139494003_G_C_b38	191452	chr4	139494003	G	C	1	rs11730829	328	444	0.477419	-1	2.75217e-12	-0.156868	0.0217376	9.999e-05	1.61621e-08	1.93575e-08	0.000113512	-0.09629	-0.119016	-0.076993
Esophagus_Muscularis	ENSG00000133710.15	SPINK5	chr5	148025683	148137289	+	7805	1.04616	835.488	348.846	1.04369e-32	chr5_148089408_G_C_b38	63725	chr5	148089408	G	C	1	rs4529181	285	352	0.383442	-1	8.14105e-37	-0.581763	0.0412879	9.999e-05	3.89486e-31	1.85164e-30	0.000159256	-1.46264	-1.68803	-1.31189
Esophagus_Muscularis	ENSG00000123545.5	NDUFAF4	chr6	96889313	96897881	-	7110	1.03724	542.652	346.223	1.1783e-37	chr6_96822328_C_G_b38	-75553	chr6	96822328	C	G	1	rs75638678	107	110	0.11828	1	1.00827e-42	0.502531	0.0323938	9.999e-05	3.35257e-36	1.99603e-35	0.000239625	0.408912	0.3667	0.447587
Esophagus_Muscularis	ENSG00000164638.10	SLC29A4	chr7	5274369	5306789	+	10514	1.05202	1179.94	337.659	8.09443e-23	chr7_5271688_T_C_b38	-2681	chr7	5271688	T	C	1	rs4724493	237	277	0.297849	-1	2.01346e-26	-0.475349	0.0415013	9.999e-05	9.56511e-21	2.67194e-20	0.00011446	-0.754999	-0.903801	-0.651096
Esophagus_Muscularis	ENSG00000128609.14	NDUFA5	chr7	123536997	123558255	-	6874	1.03376	483.977	344.892	2.33752e-28	chr7_123404512_C_T_b38	-153743	chr7	123404512	C	T	1	rs10226746	141	153	0.164516	1	3.06311e-32	-0.327125	0.0252482	9.999e-05	1.60376e-26	6.09128e-26	0.000266256	-0.238131	-0.263475	-0.212003
Esophagus_Muscularis	ENSG00000090266.12	NDUFB2	chr7	140696821	140706646	+	6210	1.03199	806.715	349.926	1.79552e-13	chr7_140696918_G_A_b38	97	chr7	140696918	G	A	1	rs113951414	22	22	0.0236559	1	5.12941e-15	-0.528629	0.0649239	9.999e-05	6.92059e-11	1.01181e-10	0.000159012	-0.480539	-0.552492	-0.355284
Esophagus_Muscularis	ENSG00000257335.8	MGAM	chr7	141907813	142106747	+	6643	1.02276	775.278	352.954	6.95238e-08	chr7_141747751_G_C_b38	-160062	chr7	141747751	G	C	1	rs62486741	300	396	0.455172	1	1.16359e-08	-0.322202	0.0552818	9.999e-05	4.26768e-05	3.58654e-05	0.000161491	-0.783458	-1.10298	-0.616651
Esophagus_Muscularis	ENSG00000106617.13	PRKAG2	chr7	151556111	151877041	-	7561	1.02471	1433.69	360.322	5.87629e-09	chr7_151681419_A_G_b38	-195622	chr7	151681419	A	G	1	rs6978142	282	340	0.365591	1	1.09949e-09	-0.156213	0.0250163	9.999e-05	6.24518e-06	5.77196e-06	8.77831e-05	-0.174	-0.223032	-0.128598
Esophagus_Muscularis	ENSG00000254087.7	LYN	chr8	55879813	56014168	+	7973	1.04458	686.932	345.837	5.01218e-22	chr8_55880680_A_G_b38	867	chr8	55880680	A	G	1	rs6983130	184	203	0.21828	1	6.22628e-25	0.409926	0.0370832	9.999e-05	5.07546e-20	1.36493e-19	0.000192911	0.429043	0.381621	0.471451
Esophagus_Muscularis	ENSG00000153707.16	PTPRD	chr9	8314246	10612723	-	11646	1.02595	1144.52	347.303	7.69892e-08	chr9_11395509_T_A_b38	782786	chr9	11395509	T	A	1	rs10809452	239	284	0.311404	1	9.94313e-09	-0.256411	0.0437801	9.999e-05	6.83822e-05	5.5971e-05	0.000110321	-0.423191	-0.51553	-0.27783
Esophagus_Muscularis	ENSG00000174775.16	HRAS	chr11	532242	537287	-	6400	1.03404	828.725	348.267	5.06909e-24	chr11_534242_A_G_b38	-3045	chr11	534242	A	G	1	rs12628	250	303	0.325806	1	4.97184e-27	-0.274343	0.0236202	9.999e-05	8.38201e-22	2.48588e-21	0.000155618	-0.193228	-0.223135	-0.16675
Esophagus_Muscularis	ENSG00000187486.5	KCNJ11	chr11	17385859	17389331	-	6662	1.05144	746.051	349.077	7.40319e-25	chr11_17380631_G_A_b38	-8700	chr11	17380631	G	A	1	rs2355016	185	209	0.224731	1	6.47052e-28	-0.578818	0.0488558	9.999e-05	4.35506e-23	1.38686e-22	0.000180755	-1.25593	-1.62621	-0.910042
Esophagus_Muscularis	ENSG00000006071.12	ABCC8	chr11	17392885	17476845	-	6843	1.01646	808.079	355.249	1.75676e-07	chr11_17476247_C_G_b38	-598	chr11	17476247	C	G	1	rs985136	340	458	0.492473	1	3.62381e-08	0.163733	0.0291369	9.999e-05	0.000121828	9.66744e-05	0.00015236	0.403641	0.283105	0.583816
Esophagus_Muscularis	ENSG00000167792.11	NDUFV1	chr11	67606852	67612535	+	6269	1.02484	598.754	347.612	2.64827e-17	chr11_67632499_C_T_b38	25647	chr11	67632499	C	T	1	rs3765088	341	457	0.491398	-1	1.87752e-19	-0.248363	0.026111	9.999e-05	7.12569e-15	1.37837e-14	0.00021025	-0.094561	-0.10768	-0.07273
Esophagus_Muscularis	ENSG00000110717.12	NDUFS8	chr11	68030627	68036644	+	7034	1.06797	565.452	333.821	1.42026e-14	chr11_68029165_T_C_b38	-1462	chr11	68029165	T	C	1	rs15518	198	220	0.236559	1	5.71748e-17	0.188877	0.0215559	9.999e-05	1.37238e-12	2.26706e-12	0.000248533	0.120895	0.094207	0.147267
Esophagus_Muscularis	ENSG00000151366.12	NDUFC2	chr11	78068352	78080219	-	7061	1.06306	634.565	337.929	1.2918e-16	chr11_78139763_C_T_b38	59544	chr11	78139763	C	T	1	rs582266	143	159	0.170968	1	3.66191e-19	-0.279198	0.0296194	9.999e-05	1.19202e-14	2.26711e-14	0.000218792	-0.164607	-0.191345	-0.141992
Esophagus_Muscularis	ENSG00000139180.10	NDUFA9	chr12	4649107	4694317	+	7796	1.01639	1671.36	366.764	3.74531e-10	chr12_4660635_C_A_b38	11528	chr12	4660635	C	A	1	rs11614014	239	284	0.305376	1	7.96454e-11	0.123296	0.0184476	9.999e-05	4.91849e-07	5.0915e-07	7.36532e-05	0.078996	0.06156	0.096786
Esophagus_Muscularis	ENSG00000137806.8	NDUFAF1	chr15	41387349	41402519	-	6332	1.05051	500.943	338.99	3.00102e-27	chr15_41497537_T_C_b38	95018	chr15	41497537	T	C	1	rs2026945	178	196	0.210753	1	1.75359e-31	-0.41894	0.0328193	9.999e-05	9.21032e-26	3.35177e-25	0.000268547	-0.302992	-0.343292	-0.257766
Esophagus_Muscularis	ENSG00000169032.9	MAP2K1	chr15	66386817	66492312	+	6979	1.03196	810.799	346.859	2.14146e-07	chr15_66330099_G_A_b38	-56718	chr15	66330099	G	A	1	rs113238971	189	209	0.224731	1	3.1063e-08	-0.170538	0.0301937	9.999e-05	0.000129841	0.000102725	0.000158198	-0.107207	-0.135409	-0.073262
Esophagus_Muscularis	ENSG00000140443.13	IGF1R	chr15	98648971	98964530	+	9669	1.03052	1577.89	355.828	2.99017e-08	chr15_98957027_G_A_b38	308056	chr15	98957027	G	A	1	rs2593053	286	355	0.38172	1	5.23563e-09	-0.171255	0.0286776	9.999e-05	3.4357e-05	2.91592e-05	8.09888e-05	-0.12434	-0.162	-0.092866
Esophagus_Muscularis	ENSG00000167720.12	SRR	chr17	2303383	2325260	+	8461	1.03697	1414.74	353.398	2.08031e-76	chr17_2304032_G_A_b38	649	chr17	2304032	G	A	1	rs3744270	237	281	0.302151	1	3.42141e-85	-0.702694	0.0276333	9.999e-05	6.02596e-76	1.81255e-74	9.18576e-05	-0.746278	-0.794579	-0.676964
Esophagus_Muscularis	ENSG00000142494.13	SLC47A1	chr17	19495385	19579034	+	4687	1.0424	465.284	346.339	4.80931e-19	chr17_19524529_CG_C_b38	29144	chr17	19524529	CG	C	1	rs35416333	276	336	0.36129	1	1.67887e-21	-0.503062	0.0497887	9.999e-05	4.76656e-17	1.07581e-16	0.000283205	-1.03351	-1.28628	-0.761969
Esophagus_Muscularis	ENSG00000171298.12	GAA	chr17	80101556	80119879	+	9997	1.0359	1870.47	358.354	8.81222e-53	chr17_80101663_G_C_b38	107	chr17	80101663	G	C	1	rs2304849	188	202	0.217204	1	5.31386e-58	-0.821737	0.0430621	9.999e-05	2.8769e-51	2.99323e-50	6.92855e-05	-0.507299	-0.570465	-0.458537
Esophagus_Muscularis	ENSG00000176105.13	YES1	chr18	721588	812546	-	7891	1.04284	1206.03	354.999	2.29493e-09	chr18_690702_A_AAGCTGTTTCCCCTGGAGAGTCC_b38	-121844	chr18	690702	A	AAGCTGTTTCCCCTGGAGAGTCC	1	rs145372402	175	200	0.21645	1	2.90919e-10	0.176443	0.0272722	9.999e-05	1.57004e-06	1.54059e-06	0.000109396	0.129955	0.099691	0.158249
Esophagus_Muscularis	ENSG00000174886.12	NDUFA11	chr19	5891276	5904006	-	8886	1.01784	1676.39	362.135	9.86634e-18	chr19_5895347_C_T_b38	-8659	chr19	5895347	C	T	1	rs72989070	133	145	0.155914	1	3.34602e-19	-0.268958	0.0284981	9.999e-05	9.31783e-15	1.78716e-14	7.37174e-05	-0.156446	-0.179836	-0.137154
Esophagus_Muscularis	ENSG00000130203.9	APOE	chr19	44905754	44909393	+	7861	1.03578	1133.28	352.472	7.3438e-09	chr19_44935906_C_G_b38	30152	chr19	44935906	C	G	1	rs35136575	206	237	0.254839	1	9.22521e-10	0.297624	0.0474336	9.999e-05	5.39224e-06	5.01506e-06	0.000114316	0.634135	0.489893	0.776648
Esophagus_Muscularis	ENSG00000171051.8	FPR1	chr19	51745172	51804110	-	10609	1.05611	1549.41	348.344	2.12592e-10	chr19_51755312_C_T_b38	-48798	chr19	51755312	C	T	1	rs4802862	252	295	0.317204	-1	1.33735e-11	0.18656	0.0267666	9.999e-05	1.39075e-07	1.52615e-07	8.80716e-05	0.622842	0.471671	0.870664
Esophagus_Muscularis	ENSG00000170906.15	NDUFA3	chr19	54102728	54109257	+	12746	1.03184	2259.5	353.417	7.67541e-58	chr19_54108427_A_G_b38	5699	chr19	54108427	A	G	1	rs75622830	92	97	0.104301	1	1.93082e-64	0.762278	0.0370553	9.999e-05	3.32206e-56	4.11797e-55	5.67538e-05	0.501512	0.474081	0.535777
Esophagus_Muscularis	ENSG00000160194.17	NDUFV3	chr21	42879644	42913304	+	8344	1.01563	1344.71	357.949	4.64778e-67	chr21_42903610_C_T_b38	23966	chr21	42903610	C	T	1	rs4148974	49	52	0.055914	1	8.123e-74	-1.16362	0.0511522	9.999e-05	6.38229e-65	1.15402e-63	9.13575e-05	-0.902915	-1.00733	-0.819236
Esophagus_Muscularis	ENSG00000100030.14	MAPK1	chr22	21754500	21867680	-	8085	1.04815	1125.08	354.131	1.98884e-08	chr22_21909763_A_C_b38	42083	chr22	21909763	A	C	1	rs240051	342	454	0.488172	1	3.05813e-09	-0.110079	0.0181446	9.999e-05	1.30827e-05	1.16683e-05	0.000118868	-0.053538	-0.068241	-0.040205
Esophagus_Muscularis	ENSG00000100191.5	SLC5A4	chr22	32218476	32255341	-	8455	1.05599	828.388	345.567	1.36561e-21	chr22_32365481_G_A_b38	110140	chr22	32365481	G	A	1	rs16990269	48	49	0.0526882	1	1.87501e-24	1.19003	0.108934	9.999e-05	1.09142e-19	2.8838e-19	0.00016467	2.41152	2.14773	2.62381
Esophagus_Muscularis	ENSG00000184983.9	NDUFA6	chr22	42085525	42090930	-	7183	1.03758	521.483	334.477	1.62182e-46	chr22_42084417_G_A_b38	-6513	chr22	42084417	G	A	1	rs139043947	32	33	0.0354839	1	1.27178e-54	0.885416	0.0483825	9.999e-05	2.00274e-45	1.67688e-44	0.00024957	0.605237	0.553174	0.649583
Esophagus_Muscularis	ENSG00000100197.20	CYP2D6	chr22	42126499	42130906	-	7271	1.06056	539.446	333.262	5.58315e-29	chr22_42132844_C_A_b38	1938	chr22	42132844	C	A	1	rs28680494	307	402	0.432258	-1	4.80976e-34	0.520944	0.0388543	9.999e-05	8.34884e-28	3.36427e-27	0.000255766	0.797416	0.702562	0.885381
Esophagus_Muscularis	ENSG00000147123.10	NDUFB11	chrX	47142216	47144868	-	3948	1.05698	456.07	347.38	1.90926e-13	chrX_47112223_T_C_b38	-32645	chrX	47112223	T	C	1	rs13440535	170	282	0.303226	1	4.37777e-15	-0.176295	0.0215924	9.999e-05	2.269e-11	3.43607e-11	0.000299816	-0.094327	-0.114362	-0.080037
Esophagus_Muscularis	ENSG00000072506.12	HSD17B10	chrX	53431258	53434373	-	2292	1.0281	325.755	354.671	2.25293e-08	chrX_53361418_CGAAA_C_b38	-72955	chrX	53361418	CGAAA	C	1	rs1219926477	253	420	0.451613	-1	3.61035e-09	-0.0829069	0.0137318	9.999e-05	5.20106e-06	4.84862e-06	0.000389738	-0.059011	-0.080304	-0.041784
Esophagus_Muscularis	ENSG00000125356.6	NDUFA1	chrX	119871828	119876662	+	4918	1.05464	696.246	350.505	9.3291e-10	chrX_119869161_G_A_b38	-2667	chrX	119869161	G	A	1	rs5909664	271	462	0.496774	1	8.14565e-11	0.0854492	0.012792	9.999e-05	2.91129e-07	3.09549e-07	0.000195254	0.065175	0.047378	0.079956
Heart_Atrial_Appendage	ENSG00000168653.10	NDUFS5	chr1	39026318	39034636	+	6847	1.03608	979.845	272.198	1.34126e-50	chr1_39026790_C_T_b38	472	chr1	39026790	C	T	1	rs3768324	184	217	0.291667	1	5.96003e-56	-0.380548	0.0193652	9.999e-05	2.63264e-49	8.13664e-48	8.05985e-05	-0.334935	-0.381973	-0.301159
Heart_Atrial_Appendage	ENSG00000085832.16	EPS15	chr1	51354263	51519328	-	4443	1.03769	245.792	258.646	1.97937e-16	chr1_51370670_G_A_b38	-148658	chr1	51370670	G	A	1	rs148648502	37	38	0.0510753	1	6.27646e-19	0.594986	0.0625659	9.999e-05	1.50743e-14	5.90002e-14	0.000322807	0.27788	0.232239	0.37987
Heart_Atrial_Appendage	ENSG00000134184.12	GSTM1	chr1	109687814	109693745	+	6623	1.01843	1004.05	273.26	1.64873e-15	chr1_109675302_G_A_b38	-12512	chr1	109675302	G	A	1	rs611951	108	116	0.155914	-1	5.55149e-17	-0.837792	0.094208	9.999e-05	9.96229e-13	3.33316e-12	7.45224e-05	-4.09795	-4.81927	-3.49783
Heart_Atrial_Appendage	ENSG00000131781.12	FMO5	chr1	147175351	147243050	-	6443	1.03747	658.651	265.739	1.58946e-12	chr1_147226096_A_T_b38	-16954	chr1	147226096	A	T	1	rs10900327	277	368	0.494624	-1	4.92121e-14	0.321156	0.0406048	9.999e-05	4.74618e-10	1.23158e-09	0.000120402	0.421336	0.34302	0.499023
Heart_Atrial_Appendage	ENSG00000158864.12	NDUFS2	chr1	161197104	161214395	+	7456	1.04012	858.159	269.278	4.96634e-08	chr1_161214307_A_G_b38	17203	chr1	161214307	A	G	1	rs1136224	103	117	0.157258	1	7.70104e-09	0.159544	0.0268448	9.999e-05	2.79676e-05	4.26314e-05	9.315e-05	0.16043	0.118705	0.192204
Heart_Atrial_Appendage	ENSG00000094963.13	FMO2	chr1	171185208	171211230	+	7658	1.04657	634.35	263.557	1.22438e-10	chr1_171167180_G_A_b38	-18028	chr1	171167180	G	A	1	rs78893152	52	55	0.0739247	1	5.55833e-12	-0.500938	0.0697998	9.999e-05	3.5509e-08	7.65676e-08	0.000128455	-0.887644	-1.14006	-0.732065
Heart_Atrial_Appendage	ENSG00000023228.13	NDUFS1	chr2	206114817	206159584	-	6870	1.04373	877.299	265.857	3.45225e-10	chr2_206134960_T_G_b38	-24624	chr2	206134960	T	G	1	rs10166505	271	361	0.485215	-1	2.2196e-11	-0.0981714	0.0141199	9.999e-05	1.54144e-07	3.10316e-07	9.2105e-05	-0.117207	-0.159221	-0.076282
Heart_Atrial_Appendage	ENSG00000130414.11	NDUFA10	chr2	239892450	240025402	-	10077	1.02451	1743.96	276.43	8.60644e-36	chr2_240018384_G_A_b38	-7018	chr2	240018384	G	A	1	rs10804402	115	121	0.162634	1	5.99298e-39	-0.437517	0.0288832	9.999e-05	2.46557e-33	3.13706e-32	4.37188e-05	-0.473723	-0.541042	-0.420241
Heart_Atrial_Appendage	ENSG00000142330.19	CAPN10	chr2	240586716	240617705	+	9651	1.05787	1367.99	268.571	5.15238e-21	chr2_240593541_A_G_b38	6825	chr2	240593541	A	G	1	rs11680323	72	76	0.102151	1	1.95597e-23	-0.585633	0.0538934	9.999e-05	6.98841e-19	3.79362e-18	6.15784e-05	-0.446304	-0.524466	-0.373505
Heart_Atrial_Appendage	ENSG00000157017.15	GHRL	chr3	10285747	10291451	-	7468	1.03324	1040.19	266.58	8.2626e-11	chr3_10323109_G_T_b38	31658	chr3	10323109	G	T	1	rs154239	197	237	0.318548	1	4.69263e-12	-0.44686	0.0620307	9.999e-05	4.93264e-08	1.04876e-07	7.52744e-05	-0.608572	-0.753106	-0.430028
Heart_Atrial_Appendage	ENSG00000132170.19	PPARG	chr3	12287368	12434356	+	7876	1.04482	986.144	267.819	3.7197e-08	chr3_12287696_G_C_b38	328	chr3	12287696	G	C	1	rs2920502	195	228	0.306452	1	5.06721e-09	-0.248899	0.0413492	9.999e-05	2.2758e-05	3.51419e-05	8.22056e-05	-0.265547	-0.350893	-0.188576
Heart_Atrial_Appendage	ENSG00000114770.16	ABCC5	chr3	183919934	184018015	-	7604	1.04554	1011.96	267.258	2.90464e-07	chr3_183922361_GA_G_b38	-95654	chr3	183922361	GA	G	1	rs60053269	253	331	0.444892	1	4.94345e-08	0.180847	0.0323217	0.00029997	0.000198943	0.000267156	8.02801e-05	0.162181	0.103261	0.215046
Heart_Atrial_Appendage	ENSG00000164258.11	NDUFS4	chr5	53560633	53683340	+	8298	1.03054	738.396	264.678	4.75951e-11	chr5_53722593_G_T_b38	161960	chr5	53722593	G	T	1	rs11957871	230	292	0.392473	-1	2.10127e-12	0.155455	0.0212039	9.999e-05	2.05322e-08	4.52655e-08	0.000105173	0.118647	0.096728	0.150061
Heart_Atrial_Appendage	ENSG00000133710.15	SPINK5	chr5	148025683	148137289	+	7805	1.03974	871.92	269.632	1.49988e-38	chr5_148047991_A_G_b38	22308	chr5	148047991	A	G	1	rs10058108	251	324	0.435484	-1	5.61239e-43	-0.818929	0.0504985	9.999e-05	5.28341e-37	8.16466e-36	9.15757e-05	-2.01361	-2.23172	-1.74753
Heart_Atrial_Appendage	ENSG00000112164.5	GLP1R	chr6	39048798	39087743	+	7753	1.03932	847.469	265.828	1.30998e-13	chr6_39064213_C_A_b38	15415	chr6	39064213	C	A	1	rs2003132	224	269	0.361559	1	2.93151e-15	0.383497	0.0460573	9.999e-05	4.43197e-11	1.27401e-10	9.40991e-05	1.31314	1.02498	1.57103
Heart_Atrial_Appendage	ENSG00000123545.5	NDUFAF4	chr6	96889313	96897881	-	7110	1.02187	610.214	272.626	1.64052e-19	chr6_96799992_G_A_b38	-97889	chr6	96799992	G	A	1	rs392242	93	97	0.130376	1	1.90509e-21	0.265976	0.0258778	9.999e-05	4.43024e-17	2.09849e-16	0.000123928	0.287962	0.219031	0.345121
Heart_Atrial_Appendage	ENSG00000189043.9	NDUFA4	chr7	10931951	10940256	-	10380	1.06609	847.384	256.729	3.6715e-07	chr7_10879790_G_A_b38	-60466	chr7	10879790	G	A	1	rs6961017	239	303	0.407258	-1	3.46397e-08	0.0998311	0.0176287	0.00019998	0.000177155	0.000239573	0.000101797	0.070297	0.035919	0.10523
Heart_Atrial_Appendage	ENSG00000090266.12	NDUFB2	chr7	140696821	140706646	+	6210	1.05152	757.346	264.914	2.46825e-16	chr7_140696918_G_A_b38	97	chr7	140696918	G	A	1	rs113951414	11	11	0.0147849	1	2.08156e-18	-0.758755	0.0811768	9.999e-05	4.03694e-14	1.52029e-13	0.000109178	-0.944507	-1.17631	-0.735465
Heart_Atrial_Appendage	ENSG00000254087.7	LYN	chr8	55879813	56014168	+	7973	1.05007	734.424	268.202	1.06006e-14	chr8_55880680_A_G_b38	867	chr8	55880680	A	G	1	rs6983130	147	160	0.215054	1	2.2983e-16	0.385407	0.0443375	9.999e-05	2.11588e-12	6.84641e-12	0.000112106	0.346447	0.305809	0.429563
Heart_Atrial_Appendage	ENSG00000136877.14	FPGS	chr9	127794597	127814327	+	5342	1.0483	615.576	264.088	5.53433e-08	chr9_127741333_C_G_b38	-53264	chr9	127741333	C	G	1	rs539472	243	319	0.428763	-1	6.21625e-09	0.152622	0.0255124	9.999e-05	2.02945e-05	3.15614e-05	0.000133052	0.109083	0.075191	0.131248
Heart_Atrial_Appendage	ENSG00000174775.16	HRAS	chr11	532242	537287	-	6400	1.0466	842.313	267.347	5.43927e-12	chr11_545276_G_T_b38	7989	chr11	545276	G	T	1	rs12421239	145	162	0.217742	1	2.34395e-13	-0.249104	0.0324672	9.999e-05	1.83481e-09	4.50832e-09	9.67513e-05	-0.176441	-0.214421	-0.135966
Heart_Atrial_Appendage	ENSG00000006071.12	ABCC8	chr11	17392885	17476845	-	6843	1.04328	768.492	267.111	2.04037e-33	chr11_17476247_C_G_b38	-598	chr11	17476247	C	G	1	rs985136	264	352	0.473118	-1	1.44691e-37	0.638121	0.0431779	9.999e-05	7.89166e-32	9.29334e-31	0.000105004	1.32801	1.17514	1.46992
Heart_Atrial_Appendage	ENSG00000151366.12	NDUFC2	chr11	78068352	78080219	-	7061	1.04413	699.075	265.725	7.86763e-15	chr11_78113371_G_GTA_b38	33152	chr11	78113371	G	GTA	1	rs147780183	106	117	0.157258	1	1.19115e-16	-0.252802	0.0287745	9.999e-05	1.7184e-12	5.60297e-12	0.000115722	-0.179117	-0.219872	-0.154075
Heart_Atrial_Appendage	ENSG00000139180.10	NDUFA9	chr12	4649107	4694317	+	7796	1.0327	1517.16	277.094	2.36215e-17	chr12_4657597_C_T_b38	8490	chr12	4657597	C	T	1	rs12309713	180	212	0.284946	1	8.93054e-19	0.167636	0.0177167	9.999e-05	1.28393e-14	5.04975e-14	5.15259e-05	0.194308	0.162688	0.228356
Heart_Atrial_Appendage	ENSG00000076555.15	ACACB	chr12	109116595	109268226	+	6984	1.04017	866.566	269.485	5.09627e-08	chr12_109245125_G_A_b38	128530	chr12	109245125	G	A	1	rs759559	275	358	0.481183	1	8.03152e-09	-0.162651	0.0274032	9.999e-05	2.90088e-05	4.41185e-05	9.22602e-05	-0.247533	-0.307657	-0.188527
Heart_Atrial_Appendage	ENSG00000137806.8	NDUFAF1	chr15	41387349	41402519	-	6332	1.06471	453.569	255.388	8.0496e-55	chr15_41480004_A_C_b38	77485	chr15	41480004	A	C	1	rs316606	165	192	0.258065	1	1.64089e-64	-0.560485	0.0255324	9.999e-05	1.66468e-55	7.18097e-54	0.000189415	-0.676418	-0.760933	-0.613215
Heart_Atrial_Appendage	ENSG00000169032.9	MAP2K1	chr15	66386817	66492312	+	6979	1.03641	879.967	269.603	5.49125e-08	chr15_66327267_T_C_b38	-59550	chr15	66327267	T	C	1	rs34371485	55	57	0.0766129	1	8.79551e-09	0.267939	0.045269	9.999e-05	3.31235e-05	4.99899e-05	8.98352e-05	0.217172	0.146162	0.27461
Heart_Atrial_Appendage	ENSG00000004779.9	NDUFAB1	chr16	23581002	23596356	-	7259	1.03601	1105.62	271.107	3.23583e-19	chr16_23580394_C_G_b38	-15962	chr16	23580394	C	G	1	rs464162	47	49	0.0658602	1	3.13897e-21	0.373291	0.0365503	9.999e-05	9.78609e-17	4.48529e-16	7.1415e-05	0.370007	0.289518	0.447811
Heart_Atrial_Appendage	ENSG00000167720.12	SRR	chr17	2303383	2325260	+	8461	1.0488	1468.3	272.154	9.98467e-46	chr17_2304032_G_A_b38	649	chr17	2304032	G	A	1	rs3744270	181	222	0.298387	1	1.48224e-50	-0.684917	0.0375922	9.999e-05	1.30438e-44	3.1409e-43	5.5867e-05	-0.738992	-0.799328	-0.677902
Heart_Atrial_Appendage	ENSG00000142494.13	SLC47A1	chr17	19495385	19579034	+	4687	1.03345	503.745	269.411	1.58381e-18	chr17_19533874_T_C_b38	38489	chr17	19533874	T	C	1	rs2252281	185	218	0.343849	1	1.39719e-20	-0.642624	0.0641512	9.999e-05	2.45804e-16	1.09669e-15	0.000155525	-1.14178	-1.3544	-0.927124
Heart_Atrial_Appendage	ENSG00000171298.12	GAA	chr17	80101556	80119879	+	9997	1.02318	1909.27	276.533	5.02368e-28	chr17_80101663_G_C_b38	107	chr17	80101663	G	C	1	rs2304849	148	165	0.221774	1	1.85828e-30	-0.655146	0.0509702	9.999e-05	2.63477e-25	2.13821e-24	3.97706e-05	-0.440369	-0.499037	-0.371347
Heart_Atrial_Appendage	ENSG00000170906.15	NDUFA3	chr19	54102728	54109257	+	12746	1.03216	2475.72	275.546	5.2826e-26	chr19_54099882_A_G_b38	-2846	chr19	54099882	A	G	1	rs661676	79	84	0.112903	1	2.40091e-28	0.385158	0.0313957	9.999e-05	2.55131e-23	1.86757e-22	3.15246e-05	0.37077	0.317621	0.439075
Heart_Atrial_Appendage	ENSG00000105618.13	PRPF31	chr19	54115676	54131719	+	12708	1.0334	2440.99	274.793	5.52694e-08	chr19_54128561_A_G_b38	12885	chr19	54128561	A	G	1	rs667324	275	369	0.495968	-1	1.22249e-08	0.195915	0.0334433	0.00019998	9.87336e-05	0.000139167	3.20935e-05	0.072284	0.052656	0.097734
Heart_Atrial_Appendage	ENSG00000160194.17	NDUFV3	chr21	42879644	42913304	+	8344	1.0189	1376.97	275.457	1.04884e-14	chr21_42903610_C_T_b38	23966	chr21	42903610	C	T	1	rs4148974	31	32	0.0430108	1	5.59427e-16	-0.382746	0.0446834	9.999e-05	8.93707e-12	2.74952e-11	5.44197e-05	-0.342925	-0.427018	-0.221776
Heart_Atrial_Appendage	ENSG00000100191.5	SLC5A4	chr22	32218476	32255341	-	8455	1.05595	769.99	261.979	1.0298e-09	chr22_32352886_G_A_b38	97545	chr22	32352886	G	A	1	rs12158983	42	44	0.0591398	1	5.55431e-11	-0.69528	0.102225	9.999e-05	3.52563e-07	6.80385e-07	0.000108788	-1.75867	-2.10665	-1.28474
Heart_Atrial_Appendage	ENSG00000184983.9	NDUFA6	chr22	42085525	42090930	-	7183	1.07169	531.25	256.567	5.0352e-13	chr22_42090076_G_A_b38	-854	chr22	42090076	G	A	1	rs1989202	23	23	0.030914	1	4.53935e-15	0.383796	0.0464492	9.999e-05	5.33536e-11	1.51758e-10	0.000164984	0.369197	0.291253	0.447733
Heart_Atrial_Appendage	ENSG00000100197.20	CYP2D6	chr22	42126499	42130906	-	7271	1.0556	567.993	259.251	2.55253e-13	chr22_42138592_G_A_b38	7686	chr22	42138592	G	A	1	rs2743450	139	153	0.205645	1	2.84871e-15	0.574865	0.0690056	9.999e-05	4.01479e-11	1.15954e-10	0.000147321	0.605	0.438429	0.751705
Heart_Left_Ventricle	ENSG00000168653.10	NDUFS5	chr1	39026318	39034636	+	6847	1.02337	971.522	286.591	2.12962e-46	chr1_39040469_A_G_b38	14151	chr1	39040469	A	G	1	rs11205599	189	222	0.287565	1	5.51999e-51	-0.359721	0.0198053	9.999e-05	2.05899e-44	5.37587e-43	7.08083e-05	-0.360343	-0.410505	-0.330519
Heart_Left_Ventricle	ENSG00000085832.16	EPS15	chr1	51354263	51519328	-	4443	1.07775	225.35	263.585	6.11424e-12	chr1_51370670_G_A_b38	-148658	chr1	51370670	G	A	1	rs148648502	41	42	0.0544041	1	5.03922e-14	0.407301	0.0516323	9.999e-05	2.72429e-10	8.17357e-10	0.000359808	0.292735	0.214982	0.339871
Heart_Left_Ventricle	ENSG00000134184.12	GSTM1	chr1	109687814	109693745	+	6623	1.03757	985.857	284.585	1.18195e-12	chr1_109675302_G_A_b38	-12512	chr1	109675302	G	A	1	rs611951	100	109	0.141192	-1	6.8805e-14	-0.798411	0.101814	9.999e-05	5.29313e-10	1.53898e-09	7.29483e-05	-4.5144	-4.98149	-3.67116
Heart_Left_Ventricle	ENSG00000198929.12	NOS1AP	chr1	162069774	162370475	+	7637	1.03054	972.199	283.659	6.45948e-15	chr1_162045487_A_G_b38	-24287	chr1	162045487	A	G	1	rs10918571	174	208	0.26943	1	1.90819e-16	0.306879	0.035289	9.999e-05	2.81888e-12	1.01786e-11	7.23735e-05	0.576492	0.467672	0.680084
Heart_Left_Ventricle	ENSG00000094963.13	FMO2	chr1	171185208	171211230	+	7658	1.04395	682.577	280.388	5.01952e-09	chr1_171167180_G_A_b38	-18028	chr1	171167180	G	A	1	rs78893152	50	53	0.0686529	1	5.38939e-10	-0.444658	0.0694043	9.999e-05	1.93331e-06	3.75627e-06	0.000107445	-0.786293	-1.20621	-0.540163
Heart_Left_Ventricle	ENSG00000023228.13	NDUFS1	chr2	206114817	206159584	-	6870	1.02378	862.799	277.364	3.56629e-10	chr2_206134960_T_G_b38	-24624	chr2	206134960	T	G	1	rs10166505	286	385	0.498705	-1	2.1532e-11	-0.104602	0.01506	9.999e-05	2.13208e-07	4.6441e-07	7.9834e-05	-0.111215	-0.143387	-0.071035
Heart_Left_Ventricle	ENSG00000130414.11	NDUFA10	chr2	239892450	240025402	-	10077	1.02838	1851.25	291.853	2.36751e-25	chr2_240018384_G_A_b38	-7018	chr2	240018384	G	A	1	rs10804402	119	128	0.165803	1	2.56551e-27	-0.343535	0.0288102	9.999e-05	1.07203e-22	8.34395e-22	3.77521e-05	-0.414687	-0.489549	-0.369031
Heart_Left_Ventricle	ENSG00000142330.19	CAPN10	chr2	240586716	240617705	+	9651	1.02056	1423.71	284.863	3.75384e-13	chr2_240593541_A_G_b38	6825	chr2	240593541	A	G	1	rs11680323	74	76	0.0984456	1	1.98622e-14	-0.41713	0.0519669	9.999e-05	3.41509e-10	1.01525e-09	4.78905e-05	-0.373101	-0.443221	-0.302862
Heart_Left_Ventricle	ENSG00000157017.15	GHRL	chr3	10285747	10291451	-	7468	1.04116	1142.52	281.083	1.41411e-07	chr3_10317566_C_T_b38	26115	chr3	10317566	C	T	1	rs629067	273	356	0.46114	-1	2.3872e-08	0.356046	0.0621759	9.999e-05	0.000110783	0.000168849	6.36465e-05	0.61653	0.443727	0.877316
Heart_Left_Ventricle	ENSG00000065518.7	NDUFB4	chr3	120596309	120602500	+	6840	1.03765	444.688	273.738	2.32848e-11	chr3_120596154_G_A_b38	-155	chr3	120596154	G	A	1	rs72625415	130	152	0.196891	1	6.86547e-13	-0.166991	0.0222901	9.999e-05	5.09848e-09	1.32751e-08	0.000161753	-0.186667	-0.223225	-0.143734
Heart_Left_Ventricle	ENSG00000132356.11	PRKAA1	chr5	40759379	40798374	-	7974	1.06886	431.799	266.517	3.30205e-08	chr5_40798872_C_T_b38	498	chr5	40798872	C	T	1	rs59133000	177	211	0.273316	1	1.7819e-09	0.147307	0.0237663	9.999e-05	6.41396e-06	1.16365e-05	0.000183003	0.113127	0.092171	0.138372
Heart_Left_Ventricle	ENSG00000164258.11	NDUFS4	chr5	53560633	53683340	+	8298	1.04448	757.667	279.524	7.78144e-14	chr5_53666805_G_A_b38	106172	chr5	53666805	G	A	1	rs55791118	289	385	0.498705	-1	1.90359e-15	0.151259	0.0180741	9.999e-05	2.02793e-11	6.80919e-11	9.69544e-05	0.194814	0.170536	0.232191
Heart_Left_Ventricle	ENSG00000133710.15	SPINK5	chr5	148025683	148137289	+	7805	1.03197	851.615	280.573	1.27508e-42	chr5_148047991_A_G_b38	22308	chr5	148047991	A	G	1	rs10058108	259	331	0.428756	-1	8.66215e-48	-0.854235	0.049271	9.999e-05	6.08451e-41	1.31215e-39	8.29905e-05	-2.45967	-2.62355	-2.29251
Heart_Left_Ventricle	ENSG00000112164.5	GLP1R	chr6	39048798	39087743	+	7753	1.06245	848.08	277.025	2.24196e-21	chr6_39064213_C_A_b38	15415	chr6	39064213	C	A	1	rs2003132	244	292	0.378238	1	3.66844e-24	0.540931	0.0490258	9.999e-05	1.44689e-19	9.02188e-19	9.14364e-05	1.83364	1.58456	2.09503
Heart_Left_Ventricle	ENSG00000123545.5	NDUFAF4	chr6	96889313	96897881	-	7110	1.02637	554.486	279.586	3.56311e-19	chr6_96822328_C_G_b38	-75553	chr6	96822328	C	G	1	rs75638678	94	98	0.126943	1	1.80518e-21	0.289	0.028198	9.999e-05	7.52855e-17	3.89224e-16	0.00012524	0.322792	0.271817	0.374038
Heart_Left_Ventricle	ENSG00000146477.5	SLC22A3	chr6	160348268	160452581	+	8277	1.04784	813.287	276.701	3.44446e-08	chr6_160429241_C_T_b38	80973	chr6	160429241	C	T	1	rs3106164	189	236	0.305699	1	3.70951e-09	0.336943	0.055531	0.00019998	1.66148e-05	2.8444e-05	9.1254e-05	0.498589	0.3803	0.628725
Heart_Left_Ventricle	ENSG00000189043.9	NDUFA4	chr7	10931951	10940256	-	10380	1.02511	989.612	278.12	7.08251e-09	chr7_10897910_T_A_b38	-42346	chr7	10897910	T	A	1	rs62438413	174	203	0.262953	1	6.77473e-10	0.129175	0.0202874	9.999e-05	5.14676e-06	9.4829e-06	6.98974e-05	0.115545	0.061516	0.152205
Heart_Left_Ventricle	ENSG00000001626.14	CFTR	chr7	117465784	117715971	+	5487	1.07472	498.795	277.935	1.81225e-08	chr7_117495158_C_T_b38	29374	chr7	117495158	C	T	1	rs17545644	54	60	0.0777202	1	1.93971e-09	0.575229	0.0930315	9.999e-05	3.67124e-06	6.90606e-06	0.000161165	1.58252	1.17723	1.94375
Heart_Left_Ventricle	ENSG00000090266.12	NDUFB2	chr7	140696821	140706646	+	6210	1.0447	860.701	283.119	4.01749e-14	chr7_140696918_G_A_b38	97	chr7	140696918	G	A	1	rs113951414	13	13	0.0168394	1	1.37018e-15	-0.616466	0.0732485	9.999e-05	1.15528e-11	3.96609e-11	8.54062e-05	-0.99829	-1.22168	-0.807462
Heart_Left_Ventricle	ENSG00000254087.7	LYN	chr8	55879813	56014168	+	7973	1.02655	664.781	277.997	2.78653e-09	chr8_55878887_A_G_b38	-926	chr8	55878887	A	G	1	rs72651454	138	150	0.194301	1	2.33316e-10	0.253772	0.0387443	9.999e-05	1.28999e-06	2.56117e-06	0.000104522	0.280423	0.213603	0.338096
Heart_Left_Ventricle	ENSG00000136877.14	FPGS	chr9	127794597	127814327	+	5342	1.02684	648.101	281.515	1.68902e-10	chr9_127803906_G_A_b38	9309	chr9	127803906	G	A	1	rs2183471	200	248	0.321244	-1	1.30747e-11	-0.168182	0.0239354	9.999e-05	7.03825e-08	1.6208e-07	0.00010731	-0.178836	-0.228334	-0.146081
Heart_Left_Ventricle	ENSG00000174775.16	HRAS	chr11	532242	537287	-	6400	1.03434	803.204	277.796	1.83548e-09	chr11_545276_G_T_b38	7989	chr11	545276	G	T	1	rs12421239	144	160	0.207254	1	1.43157e-10	-0.249644	0.03764	9.999e-05	9.15963e-07	1.85057e-06	8.8644e-05	-0.175749	-0.219041	-0.118168
Heart_Left_Ventricle	ENSG00000187486.5	KCNJ11	chr11	17385859	17389331	-	6662	1.02446	722.161	280.558	1.53536e-08	chr11_17385085_T_C_b38	-4246	chr11	17385085	T	C	1	rs10766395	233	286	0.370466	1	1.91468e-09	0.139733	0.0225906	9.999e-05	8.30013e-06	1.48174e-05	9.55856e-05	0.209452	0.131624	0.271258
Heart_Left_Ventricle	ENSG00000006071.12	ABCC8	chr11	17392885	17476845	-	6843	1.00722	788.37	283.551	2.20439e-36	chr11_17476247_C_G_b38	-598	chr11	17476247	C	G	1	rs985136	285	384	0.497409	1	2.34627e-40	0.584192	0.0379066	9.999e-05	1.00516e-33	1.47222e-32	8.28503e-05	1.58442	1.44633	1.79144
Heart_Left_Ventricle	ENSG00000151366.12	NDUFC2	chr11	78068352	78080219	-	7061	1.05447	636.351	273.445	2.16406e-09	chr11_78067155_C_G_b38	-13064	chr11	78067155	C	G	1	rs633966	183	225	0.291451	-1	1.2376e-10	0.147566	0.0221675	9.999e-05	6.44682e-07	1.32757e-06	0.000118986	0.119734	0.098475	0.151397
Heart_Left_Ventricle	ENSG00000139180.10	NDUFA9	chr12	4649107	4694317	+	7796	1.05483	1225.03	278.29	5.67303e-12	chr12_4657597_C_T_b38	8490	chr12	4657597	C	T	1	rs12309713	183	211	0.273316	1	2.13206e-13	0.143033	0.0186458	9.999e-05	2.42189e-09	6.54218e-09	6.18779e-05	0.132769	0.104237	0.174162
Heart_Left_Ventricle	ENSG00000137806.8	NDUFAF1	chr15	41387349	41402519	-	6332	1.06443	458.142	268.014	2.22694e-59	chr15_41384328_G_A_b38	-18191	chr15	41384328	G	A	1	rs11854820	177	209	0.270725	1	1.06618e-69	-0.644495	0.0279462	9.999e-05	2.44753e-60	1.40493e-58	0.000170245	-1.17871	-1.29055	-1.04965
Heart_Left_Ventricle	ENSG00000140443.13	IGF1R	chr15	98648971	98964530	+	9669	1.03051	1524.93	284.107	4.39463e-09	chr15_98724339_G_C_b38	75368	chr15	98724339	G	C	1	rs4965428	280	354	0.458549	-1	6.02432e-10	0.234858	0.0367681	9.999e-05	4.59826e-06	8.53473e-06	4.61373e-05	0.199023	0.160671	0.246663
Heart_Left_Ventricle	ENSG00000004779.9	NDUFAB1	chr16	23581002	23596356	-	7259	1.03055	1214.51	288.335	2.01551e-12	chr16_23580394_C_G_b38	-15962	chr16	23580394	C	G	1	rs464162	50	51	0.0660622	1	1.78943e-13	0.249585	0.0324235	9.999e-05	1.31811e-09	3.68027e-09	5.79364e-05	0.323242	0.245948	0.385471
Heart_Left_Ventricle	ENSG00000167720.12	SRR	chr17	2303383	2325260	+	8461	1.04085	1446.42	284.693	3.64127e-42	chr17_2304032_G_A_b38	649	chr17	2304032	G	A	1	rs3744270	201	242	0.313471	1	1.28904e-46	-0.669331	0.0392926	9.999e-05	1.41242e-40	2.96406e-39	5.02267e-05	-0.887062	-0.98724	-0.824944
Heart_Left_Ventricle	ENSG00000171298.12	GAA	chr17	80101556	80119879	+	9997	1.047	1862.03	288.381	1.30296e-31	chr17_80101663_G_C_b38	107	chr17	80101663	G	C	1	rs2304849	161	179	0.231865	1	1.75628e-34	-0.607731	0.0438253	9.999e-05	1.19725e-29	1.395e-28	3.97574e-05	-0.43007	-0.498853	-0.37984
Heart_Left_Ventricle	ENSG00000105329.9	TGFB1	chr19	41301705	41353911	-	6467	1.03608	824.744	280.543	1.61981e-17	chr19_41319286_C_T_b38	-34625	chr19	41319286	C	T	1	rs73045269	91	105	0.13601	1	1.54637e-19	0.294882	0.0305027	9.999e-05	4.15314e-15	1.87846e-14	8.67965e-05	0.385823	0.346125	0.434793
Heart_Left_Ventricle	ENSG00000170906.15	NDUFA3	chr19	54102728	54109257	+	12746	1.02697	2514.44	289.245	2.79133e-25	chr19_54108427_A_G_b38	5699	chr19	54108427	A	G	1	rs75622830	67	68	0.0880829	1	1.80085e-27	0.443996	0.0371024	9.999e-05	1.86544e-22	1.42494e-21	2.76722e-05	0.395173	0.341693	0.467485
Heart_Left_Ventricle	ENSG00000160194.17	NDUFV3	chr21	42879644	42913304	+	8344	1.04314	1161.26	279.169	1.99723e-20	chr21_42918300_G_A_b38	38656	chr21	42918300	G	A	1	rs2839606	274	358	0.463731	-1	6.48512e-23	0.191781	0.0179683	9.999e-05	4.36146e-18	2.44601e-17	6.3001e-05	0.165746	0.131727	0.188955
Heart_Left_Ventricle	ENSG00000100191.5	SLC5A4	chr22	32218476	32255341	-	8455	1.07173	738.464	271.995	7.39157e-17	chr22_32356428_C_CT_b38	101087	chr22	32356428	C	CT	2	rs5844990	43	46	0.0597403	1	2.44666e-19	1.09883	0.114384	9.999e-05	5.91423e-15	2.64739e-14	0.000107919	2.6838	2.35964	3.0042
Heart_Left_Ventricle	ENSG00000184983.9	NDUFA6	chr22	42085525	42090930	-	7183	1.05157	523.638	270.992	5.26255e-08	chr22_42084417_G_A_b38	-6513	chr22	42084417	G	A	1	rs139043947	23	23	0.0297927	1	4.16362e-09	0.320534	0.0530079	0.00019998	1.56769e-05	2.69628e-05	0.000143336	0.365385	0.306309	0.44923
Heart_Left_Ventricle	ENSG00000100197.20	CYP2D6	chr22	42126499	42130906	-	7271	1.04657	535.387	268.43	1.10975e-10	chr22_42138592_G_A_b38	7686	chr22	42138592	G	A	1	rs2743450	144	162	0.209845	1	2.5509e-12	0.480034	0.0658753	9.999e-05	2.68272e-08	6.44998e-08	0.000138081	0.624484	0.536395	0.704278
Heart_Left_Ventricle	ENSG00000072506.12	HSD17B10	chrX	53431258	53434373	-	2292	1.02825	339.458	288.134	6.82763e-08	chrX_53336501_G_A_b38	-97872	chrX	53336501	G	A	1	rs56801089	178	291	0.376943	1	1.59546e-08	0.0934806	0.016113	9.999e-05	1.69362e-05	2.89375e-05	0.000205774	0.053411	0.025934	0.077208
Kidney_Cortex	ENSG00000168653.10	NDUFS5	chr1	39026318	39034636	+	6847	1.02254	736.553	43.9875	5.68164e-08	chr1_39023076_A_G_b38	-3242	chr1	39023076	A	G	1	rs2889683	38	46	0.315068	1	1.40096e-08	-0.57482	0.084316	9.999e-05	3.30209e-05	0.00102139	6.23884e-06	-0.500635	-0.601501	-0.360065
Kidney_Cortex	ENSG00000130414.11	NDUFA10	chr2	239892450	240025402	-	10077	1.02861	1198.91	43.8937	7.93761e-08	chr2_239911508_G_C_b38	-113894	chr2	239911508	G	C	1	rs28406139	23	24	0.164384	1	1.94726e-08	-0.679576	0.101063	0.00019998	7.2119e-05	0.00201284	3.96717e-06	-0.578304	-0.706303	-0.409282
Kidney_Cortex	ENSG00000167720.12	SRR	chr17	2303383	2325260	+	8461	1.02779	1093.42	43.7812	1.22821e-07	chr17_2304032_G_A_b38	649	chr17	2304032	G	A	1	rs3744270	45	51	0.349315	1	3.01007e-08	-0.701113	0.106213	0.00019998	0.000103568	0.00276299	4.32981e-06	-1.002	-1.3386	-0.725026
Kidney_Cortex	ENSG00000100197.20	CYP2D6	chr22	42126499	42130906	-	7271	1.01984	423.985	42.3	1.71464e-10	chr22_42089667_T_C_b38	-41239	chr22	42089667	T	C	1	rs2284087	53	69	0.472603	-1	1.00404e-11	1.13348	0.127392	9.999e-05	5.20287e-08	4.10826e-06	1.0672e-05	1.21306	1.0458	1.45508
Liver	ENSG00000168653.10	NDUFS5	chr1	39026318	39034636	+	6847	1.03745	926.155	152.906	1.02337e-24	chr1_39023076_A_G_b38	-3242	chr1	39023076	A	G	1	rs2889683	95	111	0.266827	1	5.30548e-27	-0.553935	0.0428241	9.999e-05	1.52149e-22	4.67132e-21	3.51566e-05	-0.487621	-0.568564	-0.426766
Liver	ENSG00000134184.12	GSTM1	chr1	109687814	109693745	+	6623	1.03979	988.676	152.824	1.9758e-07	chr1_109675302_G_A_b38	-12512	chr1	109675302	G	A	1	rs611951	56	64	0.153846	-1	4.90978e-08	-0.734595	0.128553	0.00019998	0.000136658	0.000494909	3.32269e-05	-6.23683	-6.64386	-4.7487
Liver	ENSG00000131791.7	PRKAB2	chr1	147155106	147172550	-	6380	1.03931	637.223	150.445	8.36536e-08	chr1_147104512_C_A_b38	-68038	chr1	147104512	C	A	1	rs4950368	151	198	0.475962	1	1.47825e-08	-0.198409	0.0333174	9.999e-05	3.55914e-05	0.000144583	5.14583e-05	-0.35479	-0.44565	-0.261136
Liver	ENSG00000094963.13	FMO2	chr1	171185208	171211230	+	7658	1.06529	604.958	147.984	7.04886e-08	chr1_171157163_T_C_b38	-28045	chr1	171157163	T	C	1	rs1795245	146	185	0.444712	-1	9.2461e-09	-0.436977	0.0722557	9.999e-05	2.14763e-05	9.08455e-05	5.96776e-05	-1.21203	-1.4268	-0.907747
Liver	ENSG00000130414.11	NDUFA10	chr2	239892450	240025402	-	10077	1.04046	1597.35	153.202	1.49359e-12	chr2_239959194_A_AT_b38	-66208	chr2	239959194	A	AT	1	rs138899326	56	60	0.144231	1	1.26346e-13	-0.53143	0.065833	9.999e-05	1.04985e-09	8.38959e-09	2.06182e-05	-0.29702	-0.406352	-0.2432
Liver	ENSG00000146477.5	SLC22A3	chr6	160348268	160452581	+	8277	1.06894	794.404	148.493	2.44061e-11	chr6_160355293_A_G_b38	7025	chr6	160355293	A	G	1	rs675162	153	198	0.475962	1	1.21831e-12	0.540466	0.0703325	9.999e-05	5.52818e-09	4.07685e-08	4.60501e-05	0.527875	0.389332	0.655176
Liver	ENSG00000164638.10	SLC29A4	chr7	5274369	5306789	+	10514	1.01757	1440.47	152.512	1.89505e-25	chr7_5284554_GTTA_G_b38	10185	chr7	5284554	GTTA	G	1	rs79034962	24	26	0.0625	1	7.1241e-28	1.41572	0.106902	9.999e-05	1.13234e-22	3.53956e-21	2.09324e-05	3.635	3.33943	3.88933
Liver	ENSG00000187486.5	KCNJ11	chr11	17385859	17389331	-	6662	1.05067	643.228	147.968	1.83288e-08	chr11_17406010_T_C_b38	16679	chr11	17406010	T	C	1	rs739688	133	173	0.415865	-1	2.00901e-09	0.289235	0.0455983	9.999e-05	6.48851e-06	3.02407e-05	5.31964e-05	0.822443	0.586983	1.12099
Liver	ENSG00000111725.10	PRKAB1	chr12	119667753	119681630	+	6702	1.05761	783.54	148.772	2.32653e-16	chr12_119671479_AGGCACCTCTTCACAGGAC_A_b38	3726	chr12	119671479	AGGCACCTCTTCACAGGAC	A	1	rs138621699	40	43	0.103365	1	2.79187e-18	1.01558	0.103385	9.999e-05	3.2799e-14	4.48889e-13	4.48043e-05	0.57825	0.461182	0.68923
Liver	ENSG00000172915.18	NBEA	chr13	34942287	35673022	+	7098	1.02949	758.543	150.839	7.11175e-11	chr13_34904903_T_C_b38	-37384	chr13	34904903	T	C	1	rs79575711	7	7	0.0168269	1	5.97583e-12	1.61144	0.217558	9.999e-05	3.25136e-08	2.14272e-07	4.16374e-05	2.02188	1.69683	2.89229
Liver	ENSG00000167720.12	SRR	chr17	2303383	2325260	+	8461	1.0505	1286.82	150.577	1.05405e-15	chr17_2305580_G_A_b38	2197	chr17	2305580	G	A	1	rs77530532	118	137	0.329327	1	2.38886e-17	-0.66734	0.0703865	9.999e-05	3.33744e-13	4.09426e-12	2.65748e-05	-0.788747	-1.00653	-0.609557
Liver	ENSG00000181856.14	SLC2A4	chr17	7281667	7288251	+	8013	1.05299	1376.81	153.923	5.56146e-11	chr17_7280727_G_A_b38	-940	chr17	7280727	G	A	1	rs5412	69	72	0.173077	1	7.42832e-12	0.599199	0.0813182	9.999e-05	3.13957e-08	2.07699e-07	2.50682e-05	1.07835	0.741954	1.28816
Liver	ENSG00000142494.13	SLC47A1	chr17	19495385	19579034	+	4687	1.0478	469.657	149.379	1.69626e-09	chr17_19549314_G_A_b38	53929	chr17	19549314	G	A	1	rs2453574	72	76	0.182692	1	1.65733e-10	-0.345846	0.050785	9.999e-05	3.98746e-07	2.25694e-06	7.20802e-05	-0.488158	-0.634261	-0.337286
Liver	ENSG00000105329.9	TGFB1	chr19	41301705	41353911	-	6467	1.03266	884.492	153.366	2.78977e-11	chr19_41319286_C_T_b38	-34625	chr19	41319286	C	T	1	rs73045269	54	58	0.139423	1	3.20079e-12	0.486318	0.0647006	9.999e-05	1.37299e-08	9.65729e-08	3.6146e-05	0.726979	0.543299	1.13075
Liver	ENSG00000170906.15	NDUFA3	chr19	54102728	54109257	+	12746	1.03907	2689.1	157.254	1.42939e-16	chr19_54108427_A_G_b38	5699	chr19	54108427	A	G	1	rs75622830	39	42	0.100962	1	1.33368e-17	0.758618	0.0792346	9.999e-05	1.23696e-13	1.59382e-12	1.21833e-05	0.481549	0.37322	0.531186
Liver	ENSG00000160194.17	NDUFV3	chr21	42879644	42913304	+	8344	1.06556	1200.67	150.593	4.32476e-12	chr21_42913969_CAA_C_b38	34325	chr21	42913969	CAA	C	1	rs36073824	149	199	0.478365	-1	2.54109e-13	0.490476	0.0616668	9.999e-05	1.44429e-09	1.13899e-08	3.00993e-05	0.272162	0.221256	0.344129
Liver	ENSG00000184983.9	NDUFA6	chr22	42085525	42090930	-	7183	1.06091	479.064	143.866	2.21308e-12	chr22_42084417_G_A_b38	-6513	chr22	42084417	G	A	1	rs139043947	17	17	0.0408654	1	3.24361e-14	0.766713	0.0923586	9.999e-05	2.93141e-10	2.50664e-09	7.41679e-05	0.646471	0.524408	0.733381
Liver	ENSG00000100197.20	CYP2D6	chr22	42126499	42130906	-	7271	1.06368	487.837	142.964	4.77667e-09	chr22_42052757_G_T_b38	-78149	chr22	42052757	G	T	1	rs5758563	10	11	0.0264423	1	2.17612e-10	1.46755	0.217096	9.999e-05	9.91945e-07	5.28492e-06	7.35726e-05	1.60093	1.2967	2.14741
Liver	ENSG00000147123.10	NDUFB11	chrX	47142216	47144868	-	3948	1.0248	507.266	159.387	4.65241e-09	chrX_47150068_T_C_b38	5200	chrX	47150068	T	C	1	rs6611339	84	146	0.350962	-1	1.78937e-09	0.212761	0.0334257	9.999e-05	1.69333e-06	8.68771e-06	6.11425e-05	0.150681	0.104188	0.186649
Lung	ENSG00000168653.10	NDUFS5	chr1	39026318	39034636	+	6847	1.03978	874.397	393.036	1.33301e-125	chr1_39026790_C_T_b38	472	chr1	39026790	C	T	1	rs3768324	256	293	0.284466	1	5.81989e-142	-0.747343	0.0196444	9.999e-05	1.61459e-127	4.10071e-125	0.000120258	-0.652681	-0.695218	-0.603553
Lung	ENSG00000085832.16	EPS15	chr1	51354263	51519328	-	4443	1.06206	222.771	371.59	2.76449e-24	chr1_51346258_G_A_b38	-173070	chr1	51346258	G	A	1	rs2185592	44	45	0.0436893	1	9.16907e-29	0.650781	0.0544293	9.999e-05	2.89221e-23	1.26719e-22	0.000501281	0.412447	0.347941	0.495219
Lung	ENSG00000134184.12	GSTM1	chr1	109687814	109693745	+	6623	1.04447	1051.21	401.489	1.93565e-21	chr1_109675302_G_A_b38	-12512	chr1	109675302	G	A	1	rs611951	144	158	0.153398	-1	1.36348e-23	-0.850908	0.0802096	9.999e-05	3.26045e-19	1.14346e-18	0.000101331	-4.48154	-5.21875	-4.00436
Lung	ENSG00000007933.12	FMO3	chr1	171090877	171117819	+	7905	1.0509	606.148	384.041	4.03085e-19	chr1_171108231_C_G_b38	17354	chr1	171108231	C	G	1	rs2066534	194	214	0.207767	1	6.57852e-22	-0.388649	0.0382951	9.999e-05	3.83357e-17	1.1781e-16	0.00017883	-0.887462	-1.11408	-0.697695
Lung	ENSG00000094963.13	FMO2	chr1	171185208	171211230	+	7658	1.0244	643.986	391.982	6.41309e-12	chr1_171161909_C_T_b38	-23299	chr1	171161909	C	T	1	rs7062865	164	182	0.176699	1	2.46883e-13	-0.267258	0.0353933	9.999e-05	2.55185e-09	4.32821e-09	0.000156409	-0.535266	-0.626616	-0.381871
Lung	ENSG00000197635.9	DPP4	chr2	161992241	162074542	-	5554	1.05083	447.252	385.79	4.44331e-09	chr2_162107791_G_A_b38	33249	chr2	162107791	G	A	1	rs75166367	59	59	0.0572816	1	2.94836e-10	0.434842	0.0674336	9.999e-05	9.97165e-07	1.30698e-06	0.000242306	0.857733	0.652671	1.08205
Lung	ENSG00000023228.13	NDUFS1	chr2	206114817	206159584	-	6870	1.04577	897.754	390.733	1.45561e-09	chr2_206101113_T_G_b38	-58471	chr2	206101113	T	G	1	rs6718656	374	498	0.483495	-1	1.07418e-10	-0.112731	0.0170439	9.999e-05	6.88965e-07	9.20803e-07	0.000119073	-0.085103	-0.101176	-0.069864
Lung	ENSG00000169047.5	IRS1	chr2	226731317	226799759	-	8539	1.01025	1039.37	406.747	3.21092e-08	chr2_226387087_G_A_b38	-412672	chr2	226387087	G	A	1	rs13000517	347	434	0.421359	1	7.2942e-09	0.188494	0.0319598	9.999e-05	2.9896e-05	3.31523e-05	9.30648e-05	0.190289	0.132473	0.234857
Lung	ENSG00000135917.13	SLC19A3	chr2	227685210	227718012	-	8882	1.04254	862.052	390.592	3.72818e-11	chr2_227687993_C_T_b38	-30019	chr2	227687993	C	T	1	rs13025803	328	426	0.413592	1	1.65644e-12	-0.306727	0.0422057	9.999e-05	1.51427e-08	2.39021e-08	0.000122911	-0.43148	-0.559758	-0.326476
Lung	ENSG00000130414.11	NDUFA10	chr2	239892450	240025402	-	10077	1.03907	1669.75	401.358	5.9587e-47	chr2_240024509_G_T_b38	-893	chr2	240024509	G	T	1	rs7588754	284	337	0.327184	1	7.20497e-52	-0.523201	0.0301602	9.999e-05	2.04395e-45	2.3289e-44	6.28543e-05	-0.236014	-0.255416	-0.20815
Lung	ENSG00000180767.9	CHST13	chr3	126524283	126543291	+	9352	1.06305	726.572	381.303	5.5453e-50	chr3_126526007_T_C_b38	1724	chr3	126526007	T	C	1	rs12496524	354	473	0.459223	1	4.83993e-58	-0.584009	0.0312173	9.999e-05	4.65477e-50	6.38477e-49	0.000154143	-1.82061	-1.95661	-1.59771
Lung	ENSG00000114770.16	ABCC5	chr3	183919934	184018015	-	7604	1.02209	920.448	387.974	9.15629e-08	chr3_183970839_C_T_b38	-47176	chr3	183970839	C	T	1	rs9861983	180	197	0.191262	1	1.0504e-08	0.145034	0.0248658	9.999e-05	6.78537e-05	7.18079e-05	0.000108719	0.205593	0.157731	0.249135
Lung	ENSG00000109390.11	NDUFC1	chr4	139289917	139302551	-	6947	1.02301	1074.67	402.108	9.7863e-12	chr4_139319237_C_T_b38	16686	chr4	139319237	C	T	1	rs68058917	185	200	0.194175	1	7.83451e-13	0.237814	0.0322242	9.999e-05	6.82315e-09	1.11339e-08	9.33619e-05	0.114479	0.070522	0.142204
Lung	ENSG00000170606.14	HSPA4	chr5	133051962	133106449	+	6836	1.02696	880.63	393.884	1.02943e-07	chr5_133061659_G_A_b38	9697	chr5	133061659	G	A	1	rs55747751	58	61	0.0592233	1	1.54377e-08	-0.250922	0.0435388	9.999e-05	6.972e-05	7.36718e-05	0.000115212	-0.261782	-0.329973	-0.156553
Lung	ENSG00000133710.15	SPINK5	chr5	148025683	148137289	+	7805	1.02243	857.619	394.97	5.24945e-08	chr5_148121026_T_A_b38	95343	chr5	148121026	T	A	1	rs10065596	146	167	0.162136	1	7.58256e-09	-0.318165	0.0540091	9.999e-05	3.5623e-05	3.90847e-05	0.000116796	-0.774531	-0.956576	-0.571872
Lung	ENSG00000112164.5	GLP1R	chr6	39048798	39087743	+	7753	1.03527	811.442	390.114	5.25064e-09	chr6_39102251_T_A_b38	53453	chr6	39102251	T	A	1	rs9380828	311	395	0.383495	-1	4.46729e-10	-0.31192	0.0488958	9.999e-05	2.71268e-06	3.37994e-06	0.000127978	-0.905916	-1.12219	-0.672563
Lung	ENSG00000123545.5	NDUFAF4	chr6	96889313	96897881	-	7110	1.04329	576.396	393.786	6.90197e-12	chr6_96815489_A_T_b38	-82392	chr6	96815489	A	T	1	rs6568611	121	124	0.120388	-1	3.03947e-13	-0.227961	0.030312	9.999e-05	1.6898e-09	2.91826e-09	0.000184195	-0.252865	-0.318404	-0.203947
Lung	ENSG00000146477.5	SLC22A3	chr6	160348268	160452581	+	8277	1.06013	841.655	389.016	2.00705e-14	chr6_160447669_G_A_b38	99401	chr6	160447669	G	A	1	rs2457574	313	392	0.380583	1	2.77317e-16	-0.190989	0.0224546	9.999e-05	3.70197e-12	7.95058e-12	0.000132036	-0.561209	-0.680163	-0.45337
Lung	ENSG00000175445.14	LPL	chr8	19901717	19967258	+	10336	1.03356	1316.64	394.166	2.20163e-13	chr8_20076794_A_G_b38	175077	chr8	20076794	A	G	1	rs28550053	174	195	0.18932	1	6.43042e-15	0.358544	0.0444081	9.999e-05	1.3671e-10	2.5899e-10	7.85002e-05	0.513467	0.438707	0.550248
Lung	ENSG00000165078.12	CPA6	chr8	67422038	67746385	-	6040	1.01998	691.041	398.914	8.99617e-11	chr8_67737640_T_C_b38	-8745	chr8	67737640	T	C	1	rs17645658	44	45	0.0436893	1	7.50912e-12	0.912003	0.129617	9.999e-05	4.42467e-08	6.66735e-08	0.000143941	2.11493	1.46897	2.5067
Lung	ENSG00000165264.10	NDUFB6	chr9	32553011	32573184	-	8951	1.03937	771.99	388.006	3.82182e-10	chr9_32573149_C_G_b38	-35	chr9	32573149	C	G	1	rs631678	12	12	0.0116505	1	2.00331e-11	0.779003	0.11318	9.999e-05	1.60453e-07	2.29274e-07	0.000136055	0.518306	0.431628	0.657086
Lung	ENSG00000136877.14	FPGS	chr9	127794597	127814327	+	5342	1.02585	647.712	390.711	1.77573e-10	chr9_127812701_G_T_b38	18104	chr9	127812701	G	T	1	rs7868117	347	439	0.426214	1	9.8339e-12	-0.140073	0.0200268	9.999e-05	7.52555e-08	1.10916e-07	0.000156148	-0.129365	-0.155792	-0.1028
Lung	ENSG00000138207.13	RBP4	chr10	93591687	93601744	-	7289	1.02592	823.756	398.816	4.99006e-09	chr10_93599989_G_C_b38	-1755	chr10	93599989	G	C	1	rs115984006	82	85	0.0825243	1	6.52451e-10	-0.462687	0.0732598	9.999e-05	2.94757e-06	3.65488e-06	0.000122805	-1.29537	-1.76809	-0.882727
Lung	ENSG00000138115.13	CYP2C8	chr10	95036772	95069497	-	7085	1.07599	449.872	379.054	1.82239e-11	chr10_95250622_A_G_b38	181125	chr10	95250622	A	G	1	rs11188249	96	102	0.0990291	1	3.30403e-13	-0.489838	0.0652407	9.999e-05	1.92535e-09	3.30764e-09	0.00025756	-1.13241	-1.62544	-0.905205
Lung	ENSG00000174775.16	HRAS	chr11	532242	537287	-	6400	1.05837	770.739	386.17	3.3855e-23	chr11_539648_G_A_b38	2361	chr11	539648	G	A	1	rs1870726	210	237	0.230097	1	1.73561e-26	-0.307892	0.0270705	9.999e-05	1.82958e-21	7.29731e-21	0.000143506	-0.202485	-0.239752	-0.171848
Lung	ENSG00000006071.12	ABCC8	chr11	17392885	17476845	-	6843	1.06169	715.511	387.952	1.44394e-13	chr11_17515716_A_G_b38	38871	chr11	17515716	A	G	1	rs963401	279	321	0.31165	-1	2.41852e-15	-0.296283	0.0360888	9.999e-05	2.4338e-11	4.9008e-11	0.000155959	-1.05805	-1.28651	-0.863464
Lung	ENSG00000167792.11	NDUFV1	chr11	67606852	67612535	+	6269	1.04002	571.413	385.888	4.48571e-19	chr11_67607713_T_G_b38	861	chr11	67607713	T	G	1	rs7948073	357	457	0.443689	1	9.30953e-22	0.186237	0.0184265	9.999e-05	5.98692e-17	1.81856e-16	0.000184136	0.095798	0.079922	0.116034
Lung	ENSG00000110717.12	NDUFS8	chr11	68030627	68036644	+	7034	1.0736	562.008	374.089	1.97119e-18	chr11_68027598_C_T_b38	-3029	chr11	68027598	C	T	1	rs886701	216	251	0.243689	1	1.24687e-21	0.194448	0.0193062	9.999e-05	8.50143e-17	2.55866e-16	0.000204896	0.175349	0.149424	0.199019
Lung	ENSG00000151366.12	NDUFC2	chr11	78068352	78080219	-	7061	1.05412	662.117	385.116	1.26373e-22	chr11_78058756_A_G_b38	-21463	chr11	78058756	A	G	1	rs507029	140	156	0.151456	-1	6.78576e-26	0.290901	0.025928	9.999e-05	7.58115e-21	2.91165e-20	0.000165147	0.222223	0.185778	0.260956
Lung	ENSG00000151704.15	KCNJ1	chr11	128836315	128867373	-	7297	1.04504	1128.72	400.587	1.68556e-11	chr11_128802686_A_C_b38	-64687	chr11	128802686	A	C	1	rs687326	347	463	0.449515	1	1.29618e-12	-0.270675	0.0370562	9.999e-05	8.37591e-09	1.35636e-08	9.452e-05	-0.524173	-0.697056	-0.396839
Lung	ENSG00000184752.12	NDUFA12	chr12	94897055	95003770	-	8936	1.04178	1159.06	398.305	2.0725e-39	chr12_94993587_T_C_b38	-10183	chr12	94993587	T	C	1	rs9739426	336	417	0.404854	1	7.85698e-44	0.420743	0.0270684	9.999e-05	7.66702e-38	6.30773e-37	9.1226e-05	0.382468	0.334045	0.428472
Lung	ENSG00000076555.15	ACACB	chr12	109116595	109268226	+	6984	1.03787	815.069	393.112	1.22941e-08	chr12_109137386_A_G_b38	20791	chr12	109137386	A	G	1	rs1654885	107	118	0.114563	-1	1.35882e-09	-0.207567	0.0335267	9.999e-05	6.37416e-06	7.61777e-06	0.000128331	-0.260924	-0.338695	-0.177091
Lung	ENSG00000172915.18	NBEA	chr13	34942287	35673022	+	7098	1.03624	824.752	394.492	1.1119e-13	chr13_34904903_T_C_b38	-37384	chr13	34904903	T	C	1	rs79575711	22	22	0.0213592	1	3.05677e-15	0.931234	0.113879	9.999e-05	3.90622e-11	7.76249e-11	0.000126252	1.00154	0.869705	1.17098
Lung	ENSG00000168398.6	BDKRB2	chr14	96204679	96244166	+	8698	1.0365	1353.45	401.054	2.60497e-16	chr14_96136335_T_C_b38	-68344	chr14	96136335	T	C	1	rs11160313	369	498	0.483495	-1	6.24719e-18	-0.313601	0.0348172	9.999e-05	1.21841e-13	2.95714e-13	7.69925e-05	-0.825729	-0.95264	-0.671197
Lung	ENSG00000137806.8	NDUFAF1	chr15	41387349	41402519	-	6332	1.05536	518.876	383.943	1.33704e-25	chr15_41398653_T_G_b38	-3866	chr15	41398653	T	G	1	rs28897479	210	240	0.23301	1	2.05357e-29	0.308928	0.0254888	9.999e-05	4.01737e-24	1.83151e-23	0.000211436	0.357413	0.308293	0.398555
Lung	ENSG00000140443.13	IGF1R	chr15	98648971	98964530	+	9669	1.04117	1485.35	396.86	7.88689e-09	chr15_98957027_G_A_b38	308056	chr15	98957027	G	A	1	rs2593053	321	414	0.401942	1	9.88467e-10	-0.142554	0.0228255	9.999e-05	7.20948e-06	8.55632e-06	7.10677e-05	-0.13286	-0.159143	-0.097182
Lung	ENSG00000140990.14	NDUFB10	chr16	1959508	1961975	+	8673	1.03724	1331.94	396.426	1.18035e-08	chr16_1960180_G_C_b38	672	chr16	1960180	G	C	1	rs397460	158	177	0.171845	-1	1.52001e-09	0.154221	0.0249877	9.999e-05	1.02465e-05	1.19482e-05	7.83966e-05	0.120051	0.095066	0.14351
Lung	ENSG00000140675.12	SLC5A2	chr16	31483002	31489338	+	3566	1.03509	364.496	385.594	7.5987e-24	chr16_31484552_G_A_b38	1550	chr16	31484552	G	A	1	rs9934336	220	260	0.252427	1	2.84634e-27	0.521986	0.0450908	9.999e-05	5.18113e-22	2.12795e-21	0.000284732	1.04666	0.91392	1.20472
Lung	ENSG00000167720.12	SRR	chr17	2303383	2325260	+	8461	1.03599	1574.77	405.096	3.99163e-64	chr17_2304032_G_A_b38	649	chr17	2304032	G	A	1	rs3744270	267	322	0.312621	1	2.87978e-70	-0.599163	0.0280301	9.999e-05	4.21882e-63	9.30425e-62	6.60787e-05	-0.769555	-0.825351	-0.714797
Lung	ENSG00000142494.13	SLC47A1	chr17	19495385	19579034	+	4687	1.01312	489.297	395.807	4.80035e-10	chr17_19525297_A_G_b38	29912	chr17	19525297	A	G	1	rs2440164	320	389	0.37767	1	4.07024e-11	0.260814	0.0385225	9.999e-05	1.91169e-07	2.71587e-07	0.000199324	0.459297	0.335734	0.645452
Lung	ENSG00000171298.12	GAA	chr17	80101556	80119879	+	9997	1.05299	1902.98	403.39	2.14234e-61	chr17_80101663_G_C_b38	107	chr17	80101663	G	C	1	rs2304849	199	222	0.215534	1	1.51495e-67	-0.565324	0.0272013	9.999e-05	3.62322e-61	7.33337e-60	5.72903e-05	-0.587845	-0.650304	-0.534605
Lung	ENSG00000174886.12	NDUFA11	chr19	5891276	5904006	-	8886	1.0463	1476.6	397.556	4.45422e-20	chr19_5873476_G_T_b38	-30530	chr19	5873476	G	T	1	rs111291079	157	169	0.164078	1	2.75362e-22	-0.250105	0.0243929	9.999e-05	1.14805e-17	3.65655e-17	7.25021e-05	-0.155065	-0.184774	-0.131558
Lung	ENSG00000267855.5	NDUFA7	chr19	8308768	8321396	-	9066	1.02506	1455.03	401.119	1.30008e-08	chr19_8312067_G_A_b38	-9329	chr19	8312067	G	A	1	rs2927706	162	182	0.176699	1	2.10663e-09	0.128663	0.0210383	9.999e-05	1.42488e-05	1.63877e-05	6.93587e-05	0.117559	0.08066	0.142557
Lung	ENSG00000105329.9	TGFB1	chr19	41301705	41353911	-	6467	1.03406	893.01	398.088	2.19574e-13	chr19_41319286_C_T_b38	-34625	chr19	41319286	C	T	1	rs73045269	119	132	0.128155	1	8.69336e-15	0.276116	0.0343788	9.999e-05	9.02373e-11	1.73285e-10	0.000115898	0.228115	0.170409	0.279796
Lung	ENSG00000130203.9	APOE	chr19	44905754	44909393	+	7861	1.03531	1081.72	395.187	3.29982e-17	chr19_44945208_T_G_b38	39454	chr19	44945208	T	G	1	rs5167	318	392	0.380583	1	3.49359e-19	0.315379	0.0336363	9.999e-05	1.17784e-14	3.07172e-14	9.6014e-05	0.83435	0.713794	0.991881
Lung	ENSG00000171051.8	FPR1	chr19	51745172	51804110	-	10609	1.05244	1616.3	395.687	1.12453e-14	chr19_51755288_C_T_b38	-48822	chr19	51755288	C	T	1	rs4802861	276	327	0.317476	-1	2.56748e-16	0.192259	0.0225764	9.999e-05	4.85565e-12	1.03633e-11	6.7351e-05	0.433045	0.335438	0.557139
Lung	ENSG00000170906.15	NDUFA3	chr19	54102728	54109257	+	12746	1.04064	2636.78	407.388	9.64939e-36	chr19_54109321_G_A_b38	6593	chr19	54109321	G	A	1	rs254262	248	281	0.272816	1	6.91084e-39	0.359445	0.0249527	9.999e-05	1.2999e-33	8.97767e-33	3.99763e-05	0.258588	0.22936	0.29328
Lung	ENSG00000160194.17	NDUFV3	chr21	42879644	42913304	+	8344	1.03263	1245.42	397.827	2.63288e-33	chr21_42903610_C_T_b38	23966	chr21	42903610	C	T	1	rs4148974	56	57	0.0553398	1	4.6639e-37	-0.594586	0.0425435	9.999e-05	3.52917e-31	2.21405e-30	8.27739e-05	-0.653517	-0.755524	-0.546534
Lung	ENSG00000100191.5	SLC5A4	chr22	32218476	32255341	-	8455	1.03567	861.857	395.872	1.06966e-20	chr22_32430735_G_A_b38	175394	chr22	32430735	G	A	1	rs2413117	209	237	0.230097	1	4.53067e-23	-0.490058	0.0468175	9.999e-05	2.24037e-18	7.45212e-18	0.000120626	-1.12494	-1.36481	-0.874272
Lung	ENSG00000184983.9	NDUFA6	chr22	42085525	42090930	-	7183	1.04423	531.701	377.924	3.84449e-78	chr22_42155833_T_C_b38	64903	chr22	42155833	T	C	1	rs4822094	32	32	0.03125	-1	1.0874e-91	-1.43958	0.0551918	9.999e-05	9.96067e-79	3.59742e-77	0.000200192	-0.897417	-0.95139	-0.845557
Lung	ENSG00000100197.20	CYP2D6	chr22	42126499	42130906	-	7271	1.01716	597.51	386.224	1.41595e-59	chr22_42138673_C_T_b38	7767	chr22	42138673	C	T	1	rs2743451	376	495	0.480583	-1	2.25783e-68	0.792693	0.0378138	9.999e-05	9.16285e-58	1.66226e-56	0.000165135	1.07495	0.997855	1.17682
Lung	ENSG00000147123.10	NDUFB11	chrX	47142216	47144868	-	3948	1.03837	485.894	397.578	5.47193e-13	chrX_47112223_T_C_b38	-32645	chrX	47112223	T	C	1	rs13440535	195	327	0.317476	1	2.31852e-14	-0.144073	0.0182534	9.999e-05	1.12202e-10	2.14055e-10	0.000215555	-0.096196	-0.115557	-0.076075
Lung	ENSG00000072506.12	HSD17B10	chrX	53431258	53434373	-	2292	1.01511	322.678	402.151	4.32302e-12	chrX_53365901_T_G_b38	-68472	chrX	53365901	T	G	1	rs7058180	279	469	0.45534	-1	3.1863e-13	-0.0890579	0.011853	9.999e-05	1.01855e-09	1.79565e-09	0.000303966	-0.09108	-0.106814	-0.073078
Lung	ENSG00000180772.6	AGTR2	chrX	116170722	116174972	+	5438	1.03601	665.259	404.922	1.62808e-08	chrX_116170939_G_A_b38	217	chrX	116170939	G	A	1	rs1403543	297	510	0.495146	1	3.20552e-09	-0.153994	0.025484	9.999e-05	7.06474e-06	8.401e-06	0.000156418	-0.927255	-1.19636	-0.609082
Lung	ENSG00000125356.6	NDUFA1	chrX	119871828	119876662	+	4918	1.0372	715.934	399.109	2.00792e-08	chrX_119885023_C_T_b38	13195	chrX	119885023	C	T	1	rs5910700	293	502	0.487379	1	3.11303e-09	0.075435	0.012473	9.999e-05	9.34238e-06	1.0936e-05	0.000145828	0.055232	0.042286	0.071597
Minor_Salivary_Gland	ENSG00000168653.10	NDUFS5	chr1	39026318	39034636	+	6847	1.03304	981.392	110.249	3.52321e-17	chr1_39026790_C_T_b38	472	chr1	39026790	C	T	1	rs3768324	70	78	0.270833	1	2.00113e-18	-0.607504	0.0583843	9.999e-05	1.22397e-14	3.73129e-13	2.20732e-05	-0.488701	-0.568897	-0.393197
Minor_Salivary_Gland	ENSG00000085832.16	EPS15	chr1	51354263	51519328	-	4443	1.04151	244.79	105.241	1.01358e-07	chr1_51581932_G_A_b38	62604	chr1	51581932	G	A	1	rs74536809	16	16	0.0555556	1	1.48613e-08	0.83279	0.136943	0.00019998	1.56904e-05	0.000114347	9.16568e-05	0.41124	0.299367	0.50594
Minor_Salivary_Gland	ENSG00000134184.12	GSTM1	chr1	109687814	109693745	+	6623	1.03472	1089.7	111.179	3.72907e-08	chr1_109718120_T_C_b38	30306	chr1	109718120	T	C	1	rs11807	59	66	0.229167	1	1.23863e-08	0.767864	0.125478	9.999e-05	2.8178e-05	0.000194029	2.00195e-05	4.0668	2.74233	5.0469
Minor_Salivary_Gland	ENSG00000130414.11	NDUFA10	chr2	239892450	240025402	-	10077	1.03979	1575.23	108.948	6.90344e-17	chr2_240027895_G_A_b38	2493	chr2	240027895	G	A	1	rs10166776	89	116	0.402778	1	2.61682e-18	-0.605379	0.0584543	9.999e-05	3.25906e-14	9.36379e-13	1.41441e-05	-0.24677	-0.289665	-0.183075
Minor_Salivary_Gland	ENSG00000180767.9	CHST13	chr3	126524283	126543291	+	9352	1.05816	787.087	107.437	1.79602e-12	chr3_126529005_C_T_b38	4722	chr3	126529005	C	T	1	rs11718493	100	134	0.465278	-1	1.16466e-13	0.646779	0.0770967	9.999e-05	4.21224e-10	6.87223e-09	3.05062e-05	2.03327	1.58525	2.45579
Minor_Salivary_Gland	ENSG00000111725.10	PRKAB1	chr12	119667753	119681630	+	6702	1.04818	824.344	107.042	6.76395e-08	chr12_119709120_G_A_b38	41367	chr12	119709120	G	A	1	rs11064881	14	14	0.0486111	1	1.2546e-08	1.1549	0.188808	9.999e-05	3.40549e-05	0.000229984	2.79753e-05	0.878039	0.627411	0.983936
Minor_Salivary_Gland	ENSG00000167720.12	SRR	chr17	2303383	2325260	+	8461	1.02176	1625.96	111.795	3.76171e-15	chr17_2304032_G_A_b38	649	chr17	2304032	G	A	1	rs3744270	72	88	0.305556	1	4.9351e-16	-0.78895	0.0839293	9.999e-05	3.45452e-12	7.74831e-11	1.27022e-05	-0.695778	-0.84601	-0.573364
Minor_Salivary_Gland	ENSG00000171298.12	GAA	chr17	80101556	80119879	+	9997	1.04444	1853.4	109.447	4.57643e-13	chr17_80102793_A_C_b38	1237	chr17	80102793	A	C	1	rs12450199	84	102	0.354167	1	4.42415e-14	-0.552796	0.0645043	9.999e-05	3.28833e-10	5.447e-09	1.2254e-05	-0.489829	-0.583657	-0.417249
Minor_Salivary_Gland	ENSG00000170906.15	NDUFA3	chr19	54102728	54109257	+	12746	1.02631	2397.98	110.203	2.43636e-09	chr19_54108427_A_G_b38	5699	chr19	54108427	A	G	1	rs75622830	28	29	0.100694	1	5.63847e-10	0.606068	0.0897547	9.999e-05	4.20673e-06	3.41446e-05	8.78121e-06	0.406347	0.278074	0.530086
Minor_Salivary_Gland	ENSG00000160194.17	NDUFV3	chr21	42879644	42913304	+	8344	1.04075	1227.36	108.076	2.32432e-10	chr21_42818865_C_T_b38	-60779	chr21	42818865	C	T	1	rs6586349	57	63	0.21875	1	2.88745e-11	0.577572	0.078697	9.999e-05	1.51668e-07	1.63322e-06	1.8225e-05	0.335827	0.283291	0.433639
Minor_Salivary_Gland	ENSG00000184983.9	NDUFA6	chr22	42085525	42090930	-	7183	1.04779	565.288	105.74	8.16756e-10	chr22_42084417_G_A_b38	-6513	chr22	42084417	G	A	1	rs139043947	13	13	0.0451389	1	7.17238e-11	0.89845	0.125456	9.999e-05	2.25164e-07	2.34681e-06	4.07299e-05	0.776384	0.706352	0.879273
Minor_Salivary_Gland	ENSG00000100197.20	CYP2D6	chr22	42126499	42130906	-	7271	1.04536	525.355	103.846	2.37965e-11	chr22_42132844_C_A_b38	1938	chr22	42132844	C	A	1	rs28680494	103	123	0.427083	-1	8.45557e-13	0.588028	0.0733555	9.999e-05	5.36898e-09	7.33949e-08	4.33922e-05	0.76398	0.561492	0.921431
Muscle_Skeletal	ENSG00000168653.10	NDUFS5	chr1	39026318	39034636	+	6847	1.05926	1001.96	570.832	1.54871e-39	chr1_39023076_A_G_b38	-3242	chr1	39023076	A	G	1	rs2889683	350	409	0.28966	1	7.44065e-44	-0.282812	0.0188317	9.999e-05	1.14119e-38	5.00817e-38	0.000165783	-0.244657	-0.273574	-0.21243
Muscle_Skeletal	ENSG00000085832.16	EPS15	chr1	51354263	51519328	-	4443	1.03635	242.364	540.647	6.67829e-65	chr1_51346258_G_A_b38	-173070	chr1	51346258	G	A	1	rs2185592	73	74	0.0524079	1	4.96436e-76	0.918247	0.0432489	9.999e-05	9.04697e-65	8.88887e-64	0.000648618	0.747044	0.675648	0.794534
Muscle_Skeletal	ENSG00000243480.7	AMY2A	chr1	103616811	103625780	+	8055	1.05456	447.446	539.699	9.8046e-13	chr1_103495504_G_T_b38	-121307	chr1	103495504	G	T	1	rs114383340	118	123	0.0871105	1	9.62935e-15	0.676073	0.0852177	9.999e-05	1.32197e-10	1.522e-10	0.000367093	1.93144	1.62776	2.17826
Muscle_Skeletal	ENSG00000134184.12	GSTM1	chr1	109687814	109693745	+	6623	1.02711	1080.14	576.189	8.15571e-27	chr1_109675302_G_A_b38	-12512	chr1	109675302	G	A	1	rs611951	194	211	0.149433	-1	1.98386e-29	-0.785647	0.0662743	9.999e-05	2.06421e-24	5.19906e-24	0.000142321	-4.79371	-5.24637	-4.29053
Muscle_Skeletal	ENSG00000131791.7	PRKAB2	chr1	147155106	147172550	-	6380	1.04547	676.759	555.925	1.02235e-15	chr1_147124724_T_C_b38	-47826	chr1	147124724	T	C	1	rs12028924	512	682	0.483003	1	9.23622e-18	-0.22573	0.0255311	9.999e-05	1.89874e-13	2.68145e-13	0.000237525	-0.21874	-0.252392	-0.177504
Muscle_Skeletal	ENSG00000131781.12	FMO5	chr1	147175351	147243050	-	6443	1.02421	694.155	561.236	1.19661e-10	chr1_147322367_G_A_b38	79317	chr1	147322367	G	A	1	rs374811282	266	307	0.217422	1	7.09921e-12	-0.322508	0.0461577	9.999e-05	5.53911e-08	5.19709e-08	0.000219865	-0.311292	-0.375033	-0.239679
Muscle_Skeletal	ENSG00000198929.12	NOS1AP	chr1	162069774	162370475	+	7637	1.03048	938.007	563.875	5.31565e-09	chr1_162069604_G_T_b38	-170	chr1	162069604	G	T	1	rs12044487	393	487	0.344901	1	5.66944e-10	0.2729	0.0433399	9.999e-05	3.39164e-06	2.71417e-06	0.000165251	0.401218	0.259417	0.547628
Muscle_Skeletal	ENSG00000007933.12	FMO3	chr1	171090877	171117819	+	7905	1.0655	634.57	549.14	7.50246e-17	chr1_171089111_A_G_b38	-1766	chr1	171089111	A	G	1	rs1736555	373	442	0.313031	1	2.84164e-19	0.37321	0.0402586	9.999e-05	6.20167e-15	9.60528e-15	0.000265596	0.602971	0.512194	0.737504
Muscle_Skeletal	ENSG00000094963.13	FMO2	chr1	171185208	171211230	+	7658	1.04928	642.137	552.867	1.3145e-10	chr1_171163968_C_T_b38	-21240	chr1	171163968	C	T	1	rs6608456	340	405	0.286827	1	5.49859e-12	0.256595	0.0365226	9.999e-05	3.7019e-08	3.52164e-08	0.000252622	0.350353	0.267965	0.435749
Muscle_Skeletal	ENSG00000023228.13	NDUFS1	chr2	206114817	206159584	-	6870	1.02778	991.323	569.854	1.59539e-46	chr2_206132080_A_G_b38	-27504	chr2	206132080	A	G	1	rs7585395	504	681	0.482295	-1	1.01079e-51	-0.161236	0.00970824	9.999e-05	1.01166e-44	5.51023e-44	0.000155328	-0.215269	-0.248018	-0.194288
Muscle_Skeletal	ENSG00000130414.11	NDUFA10	chr2	239892450	240025402	-	10077	1.0394	1730.38	576.08	8.33568e-42	chr2_240017565_G_A_b38	-7837	chr2	240017565	G	A	1	rs6732752	181	192	0.135977	1	5.64349e-46	-0.338066	0.0218765	9.999e-05	4.57986e-40	2.11636e-39	9.15551e-05	-0.368616	-0.447416	-0.343827
Muscle_Skeletal	ENSG00000142330.19	CAPN10	chr2	240586716	240617705	+	9651	1.07488	1287.16	555.273	2.11245e-14	chr2_240600693_A_G_b38	13977	chr2	240600693	A	G	1	rs12616820	198	214	0.151558	1	2.81902e-16	-0.297679	0.03542	9.999e-05	4.25413e-12	5.45374e-12	0.000133822	-0.200587	-0.24669	-0.161583
Muscle_Skeletal	ENSG00000157017.15	GHRL	chr3	10285747	10291451	-	7468	1.02676	1333.88	579.248	5.77409e-08	chr3_10332511_C_T_b38	41060	chr3	10332511	C	T	1	rs27380	395	480	0.339943	-1	1.30461e-08	0.262507	0.0455679	9.999e-05	5.90879e-05	4.13877e-05	0.00011515	0.570311	0.436159	0.883855
Muscle_Skeletal	ENSG00000178057.14	NDUFAF3	chr3	49020459	49023495	+	3237	1.05046	190.828	537.619	1.10537e-07	chr3_48725074_T_C_b38	-295385	chr3	48725074	T	C	1	rs7641050	284	319	0.225921	-1	7.73095e-09	0.143377	0.024496	9.999e-05	1.19846e-05	9.02412e-06	0.000852135	0.127945	0.095145	0.16814
Muscle_Skeletal	ENSG00000114770.16	ABCC5	chr3	183919934	184018015	-	7604	1.04278	1115.91	569.698	5.06205e-08	chr3_183984301_A_G_b38	-33714	chr3	183984301	A	G	1	rs3749440	444	544	0.385269	1	8.52476e-09	-0.131126	0.0224687	9.999e-05	3.64857e-05	2.61869e-05	0.00014313	-0.214993	-0.266486	-0.166548
Muscle_Skeletal	ENSG00000109320.11	NFKB1	chr4	102501329	102617302	+	6698	1.04229	549.35	553.115	9.02434e-15	chr4_102497028_C_G_b38	-4301	chr4	102497028	C	G	1	rs28573147	479	615	0.435552	-1	9.30281e-17	0.163072	0.0190774	9.999e-05	1.61885e-12	2.13484e-12	0.000290373	0.131065	0.10293	0.156024
Muscle_Skeletal	ENSG00000145494.11	NDUFS6	chr5	1801400	1816605	+	11055	1.00766	2029.64	582.26	1.4792e-07	chr5_1799784_T_TCCCTTACCCGGCCACACG_b38	-1616	chr5	1799784	T	TCCCTTACCCGGCCACACG	1	rs146289517	438	585	0.414306	-1	3.96307e-08	0.069267	0.012457	0.00039996	0.000281175	0.000180946	7.2136e-05	0.055142	0.030156	0.078898
Muscle_Skeletal	ENSG00000132356.11	PRKAA1	chr5	40759379	40798374	-	7974	1.06657	450.809	535.585	3.08254e-09	chr5_40810324_C_A_b38	11950	chr5	40810324	C	A	1	rs1001684	319	378	0.267705	1	1.05125e-10	0.145301	0.0221178	9.999e-05	5.49796e-07	4.7216e-07	0.000374763	0.098792	0.072343	0.121895
Muscle_Skeletal	ENSG00000164258.11	NDUFS4	chr5	53560633	53683340	+	8298	1.04909	708.126	551.298	1.93895e-19	chr5_53717380_G_A_b38	156747	chr5	53717380	G	A	1	rs35916334	445	565	0.400142	-1	3.48629e-22	0.155003	0.0154114	9.999e-05	2.23678e-17	3.9657e-17	0.00022898	0.161455	0.132268	0.197259
Muscle_Skeletal	ENSG00000170606.14	HSPA4	chr5	133051962	133106449	+	6836	1.03928	872.526	559.947	1.35699e-23	chr5_133048997_T_C_b38	-2965	chr5	133048997	T	C	1	rs4574536	269	304	0.215297	1	1.4018e-26	0.299508	0.0268115	9.999e-05	1.91935e-21	4.20247e-21	0.000181508	0.206309	0.167697	0.240886
Muscle_Skeletal	ENSG00000131495.8	NDUFA2	chr5	140638740	140647769	-	4749	1.04881	411.11	543.752	6.17951e-09	chr5_140647631_T_C_b38	-138	chr5	140647631	T	C	1	rs778593	467	598	0.423513	1	3.25898e-10	-0.0984038	0.0154059	9.999e-05	1.32604e-06	1.10304e-06	0.000394107	-0.090045	-0.10657	-0.062319
Muscle_Skeletal	ENSG00000133710.15	SPINK5	chr5	148025683	148137289	+	7805	1.04782	840.766	558.705	9.66924e-28	chr5_148047991_A_G_b38	22308	chr5	148047991	A	G	1	rs10058108	480	619	0.438385	-1	2.37026e-31	-0.569214	0.0462697	9.999e-05	5.60954e-26	1.5244e-25	0.000192276	-1.18237	-1.36614	-1.00746
Muscle_Skeletal	ENSG00000123545.5	NDUFAF4	chr6	96889313	96897881	-	7110	1.02243	586.165	561.81	5.64995e-48	chr6_96856559_C_G_b38	-41322	chr6	96856559	C	G	1	rs1359930	168	173	0.122521	-1	4.44186e-54	-0.482716	0.0282744	9.999e-05	3.29665e-46	1.89557e-45	0.000259215	-0.448984	-0.492035	-0.409818
Muscle_Skeletal	ENSG00000001630.15	CYP51A1	chr7	92112151	92142952	-	5198	1.04264	598.386	564.761	1.02659e-38	chr7_92169602_G_T_b38	26650	chr7	92169602	G	T	1	rs34040612	447	548	0.388102	1	2.2039e-43	-0.560294	0.0375527	9.999e-05	1.90045e-37	8.04037e-37	0.000266807	-0.83967	-0.939329	-0.736175
Muscle_Skeletal	ENSG00000128609.14	NDUFA5	chr7	123536997	123558255	-	6874	1.04672	474.339	548.752	1.87767e-11	chr7_123410049_GGTAAAGAC_G_b38	-148206	chr7	123410049	GGTAAAGAC	G	1	rs796484606	210	235	0.166431	1	4.83571e-13	-0.138506	0.0187576	9.999e-05	3.67079e-09	3.78062e-09	0.000339881	-0.137646	-0.16372	-0.10964
Muscle_Skeletal	ENSG00000090266.12	NDUFB2	chr7	140696821	140706646	+	6210	1.02564	863.62	570.133	1.07648e-42	chr7_140696918_G_A_b38	97	chr7	140696918	G	A	1	rs113951414	28	28	0.01983	1	1.98995e-47	-0.724092	0.0459781	9.999e-05	9.18155e-41	4.39533e-40	0.000177353	-0.961437	-1.12555	-0.845552
Muscle_Skeletal	ENSG00000254087.7	LYN	chr8	55879813	56014168	+	7973	1.06176	660.258	547.758	1.38411e-07	chr8_55878887_A_G_b38	-926	chr8	55878887	A	G	1	rs72651454	253	276	0.195467	1	1.37766e-08	0.199728	0.0347286	9.999e-05	5.007e-05	3.54193e-05	0.000253045	0.232799	0.177041	0.29984
Muscle_Skeletal	ENSG00000196730.12	DAPK1	chr9	87497228	87708633	+	8691	1.044	1168.73	566.375	6.19328e-24	chr9_87489439_C_T_b38	-7789	chr9	87489439	C	T	1	rs13299771	513	681	0.482295	1	1.11636e-26	-0.292229	0.0261034	9.999e-05	9.22819e-22	2.06157e-21	0.000137064	-0.415548	-0.488291	-0.362654
Muscle_Skeletal	ENSG00000136877.14	FPGS	chr9	127794597	127814327	+	5342	1.03597	715.539	567.447	1.99966e-08	chr9_127805658_A_G_b38	11061	chr9	127805658	A	G	1	rs116949171	49	50	0.0354108	1	2.82179e-09	-0.3781	0.0627294	9.999e-05	9.43082e-06	7.19432e-06	0.000219552	-0.376021	-0.471528	-0.268118
Muscle_Skeletal	ENSG00000138207.13	RBP4	chr10	93591687	93601744	-	7289	1.02618	811.531	565.335	3.46409e-11	chr10_93516916_G_A_b38	-84828	chr10	93516916	G	A	1	rs4919224	316	361	0.255666	-1	2.10139e-12	-0.327428	0.0456718	9.999e-05	1.76312e-08	1.71697e-08	0.000188988	-1.1142	-1.45664	-0.899746
Muscle_Skeletal	ENSG00000138115.13	CYP2C8	chr10	95036772	95069497	-	7085	1.03499	486.81	552.044	2.79616e-23	chr10_95237913_A_G_b38	168416	chr10	95237913	A	G	1	rs1049921	244	261	0.184844	1	1.41481e-26	-0.553212	0.0495272	9.999e-05	2.70479e-21	5.87392e-21	0.000321918	-1.45794	-1.8623	-1.11911
Muscle_Skeletal	ENSG00000174775.16	HRAS	chr11	532242	537287	-	6400	1.04394	814	557.261	2.16591e-15	chr11_547210_T_C_b38	9923	chr11	547210	T	C	1	rs7394514	425	533	0.377479	1	2.37598e-17	-0.165497	0.0189741	9.999e-05	5.26619e-13	7.20771e-13	0.000196758	-0.179428	-0.211343	-0.149727
Muscle_Skeletal	ENSG00000187486.5	KCNJ11	chr11	17385859	17389331	-	6662	1.03313	775.787	565.133	5.3058e-08	chr11_17374886_CCTTTAAT_C_b38	-14445	chr11	17374886	CCTTTAAT	C	1	rs138081337	258	293	0.207507	1	7.82956e-09	-0.152191	0.0260117	9.999e-05	2.9039e-05	2.10602e-05	0.000201104	-0.181106	-0.223282	-0.127492
Muscle_Skeletal	ENSG00000006071.12	ABCC8	chr11	17392885	17476845	-	6843	1.0327	723.38	557.618	5.10759e-75	chr11_17476510_G_A_b38	-335	chr11	17476510	G	A	1	rs77889556	217	236	0.167139	1	2.62834e-85	0.954379	0.0416078	9.999e-05	1.68174e-74	2.15433e-73	0.000215445	1.91549	1.81259	2.01716
Muscle_Skeletal	ENSG00000151366.12	NDUFC2	chr11	78068352	78080219	-	7061	1.03571	734.466	558.255	1.75802e-09	chr11_78148987_T_C_b38	68768	chr11	78148987	T	C	1	rs1263730	522	701	0.496459	-1	1.32293e-10	-0.0986145	0.0150953	9.999e-05	7.83346e-07	6.63497e-07	0.000213759	-0.085484	-0.106456	-0.062355
Muscle_Skeletal	ENSG00000139180.10	NDUFA9	chr12	4649107	4694317	+	7796	1.07433	1369.76	565.397	5.30964e-16	chr12_4657285_C_T_b38	8178	chr12	4657285	C	T	1	rs1990311	306	348	0.246459	1	8.27385e-18	0.116509	0.0131572	9.999e-05	8.81205e-14	1.27034e-13	0.000125594	0.135831	0.1116	0.160993
Muscle_Skeletal	ENSG00000181929.11	PRKAG1	chr12	49002274	49017402	-	6270	1.03089	553.087	550.895	5.65662e-10	chr12_49017363_C_CCAT_b38	-39	chr12	49017363	C	CCAT	1	rs4018509	442	549	0.38881	1	2.7048e-11	-0.170477	0.0251349	9.999e-05	1.94369e-07	1.74165e-07	0.00028052	-0.1288	-0.160054	-0.093051
Muscle_Skeletal	ENSG00000184752.12	NDUFA12	chr12	94897055	95003770	-	8936	1.01469	1100.15	566.717	9.20443e-10	chr12_95003776_T_C_b38	6	chr12	95003776	T	C	1	rs835044	401	473	0.334986	-1	8.79085e-11	0.11163	0.0169191	9.999e-05	8.21583e-07	6.94837e-07	0.00013547	0.096755	0.069526	0.122363
Muscle_Skeletal	ENSG00000089250.18	NOS1	chr12	117208142	117452170	-	7654	1.0347	1137.09	562.385	3.47296e-29	chr12_117441215_A_G_b38	-10955	chr12	117441215	A	G	1	rs7964940	493	615	0.435552	1	8.64283e-33	-0.281993	0.0223262	9.999e-05	5.10934e-27	1.4419e-26	0.000137737	-0.772921	-0.873888	-0.674045
Muscle_Skeletal	ENSG00000111725.10	PRKAB1	chr12	119667753	119681630	+	6702	1.05595	778.916	553.084	2.14701e-12	chr12_119671479_AGGCACCTCTTCACAGGAC_A_b38	3726	chr12	119671479	AGGCACCTCTTCACAGGAC	A	1	rs138621699	107	111	0.0786119	1	4.95138e-14	0.288389	0.0374164	9.999e-05	5.26729e-10	5.79528e-10	0.000211592	0.279046	0.221765	0.327425
Muscle_Skeletal	ENSG00000172915.18	NBEA	chr13	34942287	35673022	+	7098	1.04767	795.446	558.394	1.0253e-09	chr13_35047817_A_AACAGATTAATTTTAAAATCATAATGGGTAAT_b38	105530	chr13	35047817	A	AACAGATTAATTTTAAAATCATAATGGGTAAT	1	rs57273754	24	24	0.0178838	-1	7.20901e-11	-0.712413	0.107466	9.999e-05	4.09421e-07	3.56202e-07	0.000203157	-0.73618	-0.92159	-0.595947
Muscle_Skeletal	ENSG00000137806.8	NDUFAF1	chr15	41387349	41402519	-	6332	1.05467	495.886	544.094	1.22421e-159	chr15_41398653_T_G_b38	-3866	chr15	41398653	T	G	1	rs28897479	290	331	0.234419	1	2.80307e-186	-0.969913	0.0230125	9.999e-05	1.70579e-165	2.53862e-163	0.000331328	-1.19987	-1.38066	-1.1129
Muscle_Skeletal	ENSG00000140990.14	NDUFB10	chr16	1959508	1961975	+	8673	1.05506	1389.39	568.161	5.63989e-19	chr16_1963851_G_A_b38	4343	chr16	1963851	G	A	1	rs79381233	55	57	0.0403683	1	4.70224e-21	-0.266427	0.0273047	9.999e-05	1.12681e-16	1.93015e-16	0.00011838	-0.305948	-0.394157	-0.220605
Muscle_Skeletal	ENSG00000167720.12	SRR	chr17	2303383	2325260	+	8461	1.05387	1470.09	569.232	1.15026e-95	chr17_2304032_G_A_b38	649	chr17	2304032	G	A	1	rs3744270	370	442	0.313031	1	1.14306e-106	-0.801965	0.0298835	9.999e-05	1.87877e-97	4.61484e-96	0.000111567	-0.828419	-0.89845	-0.773378
Muscle_Skeletal	ENSG00000181856.14	SLC2A4	chr17	7281667	7288251	+	8013	1.03589	1384.27	571.95	2.0201e-10	chr17_7282460_C_A_b38	793	chr17	7282460	C	A	1	rs117643180	32	33	0.0233711	1	1.98999e-11	-0.495071	0.0724862	9.999e-05	1.60176e-07	1.44576e-07	0.000113473	-0.796086	-1.24593	-0.648487
Muscle_Skeletal	ENSG00000171298.12	GAA	chr17	80101556	80119879	+	9997	1.04438	1764.27	569.869	2.53797e-51	chr17_80101429_C_T_b38	-127	chr17	80101429	C	T	1	rs2304850	283	311	0.220255	1	4.49656e-57	-0.508657	0.0288092	9.999e-05	3.47934e-50	2.29238e-49	9.08827e-05	-0.431316	-0.483957	-0.383563
Muscle_Skeletal	ENSG00000178127.12	NDUFV2	chr18	9102630	9134345	+	9030	1.03463	1580.24	572.105	7.74283e-13	chr18_9110318_G_A_b38	7688	chr18	9110318	G	A	1	rs4798771	249	266	0.188385	-1	4.17202e-14	0.136969	0.0177159	9.999e-05	5.92222e-10	6.49608e-10	9.90968e-05	0.117279	0.097187	0.148477
Muscle_Skeletal	ENSG00000099795.6	NDUFB7	chr19	14566078	14572062	-	7506	1.04231	1234.78	565.382	1.15494e-10	chr19_14570682_T_C_b38	-1380	chr19	14570682	T	C	1	rs7250334	497	649	0.459632	-1	8.13532e-12	-0.0698513	0.0100268	9.999e-05	7.18582e-08	6.68633e-08	0.000129205	-0.08163	-0.103724	-0.057539
Muscle_Skeletal	ENSG00000105329.9	TGFB1	chr19	41301705	41353911	-	6467	1.04083	856.828	561.702	1.2595e-26	chr19_41319286_C_T_b38	-34625	chr19	41319286	C	T	1	rs73045269	175	194	0.137394	1	6.22901e-30	0.36905	0.0308245	9.999e-05	1.2238e-24	3.11177e-24	0.000185528	0.393212	0.348714	0.463733
Muscle_Skeletal	ENSG00000170906.15	NDUFA3	chr19	54102728	54109257	+	12746	1.01655	2825.47	588.642	3.56443e-62	chr19_54108427_A_G_b38	5699	chr19	54108427	A	G	1	rs75622830	145	152	0.107649	1	4.94175e-67	0.442825	0.0226453	9.999e-05	1.09688e-59	9.31244e-59	5.29975e-05	0.458231	0.419356	0.510474
Muscle_Skeletal	ENSG00000160194.17	NDUFV3	chr21	42879644	42913304	+	8344	1.0426	1266.59	566.67	5.65677e-119	chr21_42903610_C_T_b38	23966	chr21	42903610	C	T	1	rs4148974	73	75	0.0531161	1	2.67947e-133	-1.39689	0.0439926	9.999e-05	8.74662e-121	3.9872e-119	0.000126049	-1.63985	-1.81868	-1.46964
Muscle_Skeletal	ENSG00000100030.14	MAPK1	chr22	21754500	21867680	-	8085	1.03014	1240.51	580.334	1.49457e-09	chr22_21758238_T_C_b38	-109442	chr22	21758238	T	C	1	rs9610271	367	444	0.314448	1	2.47613e-10	-0.163612	0.0254372	9.999e-05	1.22941e-06	1.02586e-06	0.000124853	-0.091718	-0.123775	-0.062551
Muscle_Skeletal	ENSG00000100191.5	SLC5A4	chr22	32218476	32255341	-	8455	1.01951	731.74	546.625	1.10472e-52	chr22_32354162_A_C_b38	98821	chr22	32354162	A	C	1	rs5998434	95	97	0.0686969	1	5.2248e-61	1.47189	0.079937	9.999e-05	8.83764e-51	5.87628e-50	0.000206145	3.1276	2.80844	3.30348
Muscle_Skeletal	ENSG00000184983.9	NDUFA6	chr22	42085525	42090930	-	7183	1.0352	538.627	541.765	2.7241e-61	chr22_42155833_T_C_b38	64903	chr22	42155833	T	C	1	rs4822094	52	53	0.0376956	-1	1.21881e-71	-0.757891	0.0371204	9.999e-05	1.33084e-60	1.17318e-59	0.000291104	-0.615632	-0.676016	-0.567852
Muscle_Skeletal	ENSG00000100197.20	CYP2D6	chr22	42126499	42130906	-	7271	1.03832	583.68	542.898	1.37702e-14	chr22_42138592_G_A_b38	7686	chr22	42138592	G	A	1	rs2743450	266	298	0.211048	1	7.87983e-17	0.424533	0.0495414	9.999e-05	2.96955e-12	3.84295e-12	0.000270684	0.592029	0.502804	0.768075
Muscle_Skeletal	ENSG00000147123.10	NDUFB11	chrX	47142216	47144868	-	3948	1.05384	455.453	552.059	9.99885e-20	chrX_47138916_C_T_b38	-5952	chrX	47138916	C	T	1	rs5905590	286	477	0.337819	-1	1.73728e-22	0.122723	0.0121065	9.999e-05	5.86601e-18	1.07935e-17	0.000360027	0.116685	0.095331	0.134391
Muscle_Skeletal	ENSG00000072506.12	HSD17B10	chrX	53431258	53434373	-	2292	1.02985	327.329	567.975	5.52331e-27	chrX_53422619_G_A_b38	-11754	chrX	53422619	G	A	1	rs1264011	386	647	0.458215	-1	5.08504e-30	-0.204736	0.017071	9.999e-05	3.49036e-25	9.07565e-25	0.00047273	-0.16299	-0.185495	-0.139333
Muscle_Skeletal	ENSG00000101966.12	XIAP	chrX	123859724	123913979	+	4159	1.02826	812.442	579.962	5.15874e-10	chrX_123897720_G_A_b38	37996	chrX	123897720	G	A	1	rs6608132	316	513	0.363314	1	7.62885e-11	-0.105098	0.0158752	9.999e-05	2.73405e-07	2.41858e-07	0.000189748	-0.075608	-0.094978	-0.049487
Nerve_Tibial	ENSG00000162551.13	ALPL	chr1	21509372	21578412	+	7957	1.02665	888.09	407.419	2.30737e-07	chr1_21459575_C_T_b38	-49797	chr1	21459575	C	T	1	rs4654748	370	471	0.442669	1	3.61508e-08	-0.202279	0.0360985	9.999e-05	0.00016153	9.79342e-05	0.000175185	-0.350362	-0.493817	-0.214991
Nerve_Tibial	ENSG00000168653.10	NDUFS5	chr1	39026318	39034636	+	6847	1.0283	968.781	414.559	4.64105e-115	chr1_39004692_A_G_b38	-21626	chr1	39004692	A	G	1	rs4147753	259	301	0.282895	1	5.15204e-128	-0.598014	0.0175656	9.999e-05	3.13506e-115	1.72428e-113	0.000161248	-0.47288	-0.50237	-0.434382
Nerve_Tibial	ENSG00000085832.16	EPS15	chr1	51354263	51519328	-	4443	1.04018	248.647	396.433	1.3345e-53	chr1_51370670_G_A_b38	-148658	chr1	51370670	G	A	1	rs148648502	56	57	0.0535714	1	3.54863e-62	0.96134	0.0493287	9.999e-05	3.05553e-53	2.19283e-52	0.00064648	0.470379	0.415323	0.529942
Nerve_Tibial	ENSG00000162692.10	VCAM1	chr1	100719742	100739045	+	7352	1.05074	622.76	403.979	1.80768e-07	chr1_100691849_C_T_b38	-27893	chr1	100691849	C	T	1	rs75376323	191	212	0.199248	1	2.39576e-08	-0.295844	0.0520923	0.00019998	6.94092e-05	4.37537e-05	0.000264779	-0.573934	-0.768527	-0.457911
Nerve_Tibial	ENSG00000243480.7	AMY2A	chr1	103616811	103625780	+	8055	1.04683	435.473	390.309	1.03934e-07	chr1_103559534_A_T_b38	-57277	chr1	103559534	A	T	1	rs17014907	92	95	0.0892857	1	7.11222e-09	0.569978	0.0966379	9.999e-05	2.77574e-05	1.824e-05	0.000375123	1.21811	0.896017	1.71577
Nerve_Tibial	ENSG00000134184.12	GSTM1	chr1	109687814	109693745	+	6623	1.0588	1051.68	414.074	1.08575e-18	chr1_109675302_G_A_b38	-12512	chr1	109675302	G	A	1	rs611951	139	149	0.140038	-1	1.12814e-20	-0.806229	0.0823927	9.999e-05	1.47154e-16	2.20179e-16	0.000159809	-4.59317	-5.16572	-3.91
Nerve_Tibial	ENSG00000131791.7	PRKAB2	chr1	147155106	147172550	-	6380	1.05294	649.617	401.78	3.34965e-10	chr1_147157821_GC_G_b38	-14729	chr1	147157821	GC	G	1	rs3214715	357	457	0.429511	1	1.62207e-11	-0.197839	0.0286338	9.999e-05	9.4375e-08	7.75518e-08	0.000255159	-0.078681	-0.101194	-0.054021
Nerve_Tibial	ENSG00000158864.12	NDUFS2	chr1	161197104	161214395	+	7456	1.00179	903.676	415.191	2.03864e-13	chr1_161210087_G_A_b38	12983	chr1	161210087	G	A	1	rs4656994	200	220	0.206767	1	9.20665e-15	-0.245565	0.0306453	9.999e-05	1.76846e-10	1.80121e-10	0.000161747	-0.146618	-0.184054	-0.112107
Nerve_Tibial	ENSG00000007933.12	FMO3	chr1	171090877	171117819	+	7905	1.01348	704.819	409.529	3.59176e-14	chr1_171099045_A_G_b38	8168	chr1	171099045	A	G	1	rs2204790	210	227	0.213346	1	8.54125e-16	-0.428205	0.0513358	9.999e-05	1.81162e-11	1.97137e-11	0.00021362	-0.659315	-0.858035	-0.577056
Nerve_Tibial	ENSG00000094963.13	FMO2	chr1	171185208	171211230	+	7658	1.03448	653.132	404.205	9.99174e-24	chr1_171168633_C_A_b38	-16575	chr1	171168633	C	A	1	rs7887919	71	76	0.0714286	1	6.86242e-27	-0.908134	0.0793188	9.999e-05	1.29489e-21	2.57364e-21	0.000242804	-1.19756	-1.86888	-1.03426
Nerve_Tibial	ENSG00000115159.15	GPD2	chr2	156435290	156613735	+	5908	1.03582	532.634	401.701	1.62192e-19	chr2_156442679_G_A_b38	7389	chr2	156442679	G	A	1	rs298302	342	422	0.396617	1	3.27695e-22	0.315055	0.0308527	9.999e-05	2.26076e-17	3.56315e-17	0.000298693	0.152825	0.126059	0.177092
Nerve_Tibial	ENSG00000023228.13	NDUFS1	chr2	206114817	206159584	-	6870	1.02928	958.313	413.42	1.47656e-13	chr2_206110228_C_T_b38	-49356	chr2	206110228	C	T	1	rs10169875	379	507	0.476504	1	5.63614e-15	-0.195745	0.0242209	9.999e-05	7.19213e-11	7.5272e-11	0.000163401	-0.089854	-0.109821	-0.065453
Nerve_Tibial	ENSG00000130414.11	NDUFA10	chr2	239892450	240025402	-	10077	1.04947	1691.53	416.601	2.06093e-43	chr2_240014662_G_A_b38	-10740	chr2	240014662	G	A	1	rs11693245	133	143	0.134398	1	5.88946e-48	-0.658682	0.0401702	9.999e-05	3.81167e-42	1.84791e-41	9.71993e-05	-0.270768	-0.317591	-0.244878
Nerve_Tibial	ENSG00000142330.19	CAPN10	chr2	240586716	240617705	+	9651	1.04391	1410.16	412.619	2.39019e-16	chr2_240639120_C_G_b38	52404	chr2	240639120	C	G	1	rs4676407	249	290	0.272556	-1	4.02468e-18	-0.212015	0.0234289	9.999e-05	9.3698e-14	1.17745e-13	0.000115056	-0.111098	-0.133239	-0.086452
Nerve_Tibial	ENSG00000157017.15	GHRL	chr3	10285747	10291451	-	7468	1.04818	1098.21	405.953	1.16182e-12	chr3_10301192_C_T_b38	9741	chr3	10301192	C	T	1	rs696221	353	457	0.429511	-1	3.31635e-14	0.29795	0.0380417	9.999e-05	4.657e-10	4.5816e-10	0.000149249	0.413036	0.330199	0.518244
Nerve_Tibial	ENSG00000180767.9	CHST13	chr3	126524283	126543291	+	9352	1.03473	794.386	401.848	4.82578e-53	chr3_126524031_A_G_b38	-252	chr3	126524031	A	G	1	rs1388097	369	502	0.471804	1	1.01301e-60	-0.768782	0.0400915	9.999e-05	7.25772e-52	4.96294e-51	0.000199756	-1.7745	-1.94196	-1.54526
Nerve_Tibial	ENSG00000114770.16	ABCC5	chr3	183919934	184018015	-	7604	1.06921	982.69	404.081	3.26765e-17	chr3_183989836_C_G_b38	-28179	chr3	183989836	C	G	1	rs7635948	361	453	0.425752	-1	1.85263e-19	0.151234	0.0160215	9.999e-05	3.62638e-15	4.97021e-15	0.000175214	0.149257	0.125818	0.179444
Nerve_Tibial	ENSG00000073792.15	IGF2BP2	chr3	185643739	185825056	-	6466	1.01764	970.088	419.849	3.41458e-09	chr3_185764830_T_C_b38	-60226	chr3	185764830	T	C	1	rs6763887	279	329	0.309211	-1	5.63787e-10	-0.179514	0.0283367	9.999e-05	2.63159e-06	1.91116e-06	0.000156836	-0.144707	-0.1864	-0.106412
Nerve_Tibial	ENSG00000109390.11	NDUFC1	chr4	139289917	139302551	-	6947	1.02853	1028.4	413.679	1.22007e-07	chr4_139494003_G_C_b38	191452	chr4	139494003	G	C	1	rs11730829	373	514	0.483083	-1	2.25423e-08	-0.122326	0.021497	9.999e-05	9.59087e-05	5.94595e-05	0.000151987	-0.076118	-0.09698	-0.05746
Nerve_Tibial	ENSG00000164258.11	NDUFS4	chr5	53560633	53683340	+	8298	1.0382	759.873	406.664	1.0561e-10	chr5_53633966_G_A_b38	73333	chr5	53633966	G	A	1	rs2636993	270	310	0.291353	1	5.7944e-12	-0.176755	0.0250042	9.999e-05	4.22886e-08	3.58254e-08	0.000210591	-0.082623	-0.106089	-0.064017
Nerve_Tibial	ENSG00000170606.14	HSPA4	chr5	133051962	133106449	+	6836	1.03174	891.59	408.581	5.06284e-15	chr5_133080500_A_G_b38	28538	chr5	133080500	A	G	1	rs74492166	82	85	0.0798872	1	8.66642e-17	0.286861	0.0331687	9.999e-05	1.94294e-12	2.24605e-12	0.000176689	0.192742	0.152927	0.223021
Nerve_Tibial	ENSG00000133710.15	SPINK5	chr5	148025683	148137289	+	7805	1.03764	869.073	409.213	1.54661e-10	chr5_148076052_C_CTG_b38	50369	chr5	148076052	C	CTG	1	rs59597252	73	80	0.075188	1	1.03541e-11	-0.569536	0.0816037	9.999e-05	7.2898e-08	6.05191e-08	0.000183884	-1.54069	-2.0093	-0.93554
Nerve_Tibial	ENSG00000112164.5	GLP1R	chr6	39048798	39087743	+	7753	1.04117	876.763	409.326	2.87461e-17	chr6_39009073_G_A_b38	-39725	chr6	39009073	G	A	1	rs28360624	169	181	0.170113	1	2.71975e-19	-0.444029	0.0472804	9.999e-05	6.81998e-15	9.19127e-15	0.00018383	-1.9933	-2.81988	-1.38998
Nerve_Tibial	ENSG00000123545.5	NDUFAF4	chr6	96889313	96897881	-	7110	1.04911	574.51	405.378	5.25949e-23	chr6_96795165_C_T_b38	-102716	chr6	96795165	C	T	1	rs1206073	130	134	0.12594	1	5.38042e-26	0.385139	0.03433	9.999e-05	3.25295e-21	6.31968e-21	0.000285904	0.305356	0.260577	0.352246
Nerve_Tibial	ENSG00000146477.5	SLC22A3	chr6	160348268	160452581	+	8277	1.02576	878.825	410.127	2.20875e-27	chr6_160429241_C_T_b38	80973	chr6	160429241	C	T	1	rs3106164	274	348	0.327068	1	1.22212e-30	0.244488	0.0197328	9.999e-05	4.70274e-25	1.11371e-24	0.000176644	0.380449	0.31105	0.42264
Nerve_Tibial	ENSG00000240583.11	AQP1	chr7	30911694	30925516	+	7383	1.04545	1039.19	411.063	5.87248e-08	chr7_30831768_A_T_b38	-79926	chr7	30831768	A	T	1	rs74432030	105	113	0.106203	1	8.96712e-09	-0.297137	0.0507333	9.999e-05	3.84897e-05	2.4938e-05	0.0001567	-0.365122	-0.480129	-0.261949
Nerve_Tibial	ENSG00000257335.8	MGAM	chr7	141907813	142106747	+	6643	1.02184	900.018	423.887	2.26131e-11	chr7_141802143_G_C_b38	-105670	chr7	141802143	G	C	1	rs17524275	379	502	0.471804	1	2.89751e-12	-0.373603	0.0520701	9.999e-05	1.36938e-08	1.20956e-08	0.000170822	-0.598612	-0.747558	-0.431228
Nerve_Tibial	ENSG00000257743.8	MGAM2	chr7	142111749	142222324	+	6778	1.03077	757.819	408.604	1.30825e-20	chr7_142065610_T_C_b38	-46139	chr7	142065610	T	C	1	rs62477626	169	185	0.173872	1	4.25895e-23	-0.59871	0.0572791	9.999e-05	2.93275e-18	4.88281e-18	0.000207382	-4.06783	-4.6148	-3.20657
Nerve_Tibial	ENSG00000175445.14	LPL	chr8	19901717	19967258	+	10336	1.04848	1234.5	402.299	5.21507e-15	chr8_19966137_A_T_b38	64420	chr8	19966137	A	T	1	rs3208305	285	347	0.326128	1	5.17822e-17	0.208418	0.0239102	9.999e-05	1.80687e-12	2.09521e-12	0.000132868	0.2716	0.227504	0.360125
Nerve_Tibial	ENSG00000165078.12	CPA6	chr8	67422038	67746385	-	6040	1.04902	577.866	396.569	3.39583e-10	chr8_67587218_A_G_b38	-159167	chr8	67587218	A	G	1	rs115659681	24	24	0.0225564	1	1.21506e-11	1.21248	0.174347	9.999e-05	9.00849e-08	7.41985e-08	0.000284183	2.15905	1.4943	2.52227
Nerve_Tibial	ENSG00000165264.10	NDUFB6	chr9	32553011	32573184	-	8951	1.07552	762.633	397.573	2.4109e-18	chr9_32573149_C_G_b38	-35	chr9	32573149	C	G	1	rs631678	15	15	0.0140977	1	4.58442e-21	0.868077	0.0877308	9.999e-05	1.3708e-16	2.05539e-16	0.000229056	0.518165	0.44375	0.575071
Nerve_Tibial	ENSG00000196730.12	DAPK1	chr9	87497228	87708633	+	8691	1.03294	1128.85	413.341	1.97787e-07	chr9_87367112_T_A_b38	-130116	chr9	87367112	T	A	1	rs4878069	383	488	0.458647	-1	3.81097e-08	-0.186974	0.0334256	0.00029997	0.000166851	0.000101035	0.000139965	-0.175415	-0.241448	-0.122277
Nerve_Tibial	ENSG00000136877.14	FPGS	chr9	127794597	127814327	+	5342	1.03297	633.276	403.957	5.33397e-13	chr9_127795399_A_C_b38	802	chr9	127795399	A	C	1	rs4836582	350	446	0.419173	1	1.18017e-14	-0.1259	0.0157802	9.999e-05	1.62231e-10	1.65765e-10	0.000249497	-0.092897	-0.111082	-0.072864
Nerve_Tibial	ENSG00000138207.13	RBP4	chr10	93591687	93601744	-	7289	1.05121	767.12	406.427	3.83125e-09	chr10_93585669_A_C_b38	-16075	chr10	93585669	A	C	1	rs10082458	170	187	0.175752	1	3.34983e-10	0.221665	0.0345176	9.999e-05	1.49684e-06	1.11226e-06	0.000215198	0.537178	0.394274	0.690937
Nerve_Tibial	ENSG00000138115.13	CYP2C8	chr10	95036772	95069497	-	7085	1.05787	471.135	397.37	4.04078e-09	chr10_95101813_A_C_b38	32316	chr10	95101813	A	C	1	rs11597170	165	178	0.167293	1	2.24695e-10	-0.479877	0.0739667	9.999e-05	8.66027e-07	6.58395e-07	0.000355905	-0.852208	-1.2654	-0.508363
Nerve_Tibial	ENSG00000174775.16	HRAS	chr11	532242	537287	-	6400	1.03719	857.017	410.239	1.05769e-27	chr11_539080_G_T_b38	1793	chr11	539080	G	T	1	rs11246177	275	331	0.312264	1	5.43542e-31	-0.270942	0.0217165	9.999e-05	1.13825e-25	2.77495e-25	0.000186268	-0.180504	-0.205964	-0.152701
Nerve_Tibial	ENSG00000006071.12	ABCC8	chr11	17392885	17476845	-	6843	1.04364	747.324	406.371	2.69055e-33	chr11_17476247_C_G_b38	-598	chr11	17476247	C	G	1	rs985136	388	521	0.489662	-1	1.25951e-37	0.337337	0.0239949	9.999e-05	9.97809e-32	3.16717e-31	0.000216949	0.737976	0.59799	0.792548
Nerve_Tibial	ENSG00000167792.11	NDUFV1	chr11	67606852	67612535	+	6269	1.07569	506.109	387.421	1.52337e-42	chr11_67607110_T_C_b38	258	chr11	67607110	T	C	1	rs1871043	349	439	0.412594	1	2.1055e-50	0.37199	0.0219636	9.999e-05	8.16464e-43	4.06005e-42	0.00034526	0.138264	0.120036	0.156769
Nerve_Tibial	ENSG00000110717.12	NDUFS8	chr11	68030627	68036644	+	7034	1.0412	611.86	397.482	8.36073e-10	chr11_68022810_C_T_b38	-7817	chr11	68022810	C	T	1	rs3764817	239	275	0.258459	1	3.64296e-11	0.134331	0.0198079	9.999e-05	2.76628e-07	2.18941e-07	0.000263425	0.094542	0.07469	0.1194
Nerve_Tibial	ENSG00000151366.12	NDUFC2	chr11	78068352	78080219	-	7061	1.06883	677.993	398.227	1.85132e-24	chr11_78121423_T_G_b38	41204	chr11	78121423	T	G	1	rs7105633	182	206	0.193609	1	4.06091e-28	-0.266123	0.0226265	9.999e-05	4.43404e-23	9.53139e-23	0.000253721	-0.148343	-0.174114	-0.12016
Nerve_Tibial	ENSG00000134538.2	SLCO1B1	chr12	21131202	21239246	+	9014	1.00865	848.947	408.683	1.30372e-24	chr12_20916115_G_A_b38	-215087	chr12	20916115	G	A	1	rs60571683	64	67	0.0629699	1	1.30172e-27	1.17189	0.100735	9.999e-05	7.26393e-22	1.46751e-21	0.000175208	2.76543	2.39467	3.15544
Nerve_Tibial	ENSG00000184752.12	NDUFA12	chr12	94897055	95003770	-	8936	1.04621	1134.37	410.86	1.03934e-07	chr12_94969242_G_C_b38	-34528	chr12	94969242	G	C	1	rs11107824	259	292	0.274436	1	1.6862e-08	-0.127617	0.0222205	0.00029997	7.60652e-05	4.76856e-05	0.000143814	-0.090039	-0.118197	-0.068078
Nerve_Tibial	ENSG00000111199.10	TRPV4	chr12	109783085	109832735	-	5509	1.0313	546.392	404.983	5.20582e-22	chr12_109838274_A_T_b38	5539	chr12	109838274	A	T	1	rs7139451	369	480	0.451128	-1	6.94245e-25	-0.388206	0.0355215	9.999e-05	7.37322e-20	1.34097e-19	0.000287988	-0.49594	-0.578562	-0.422382
Nerve_Tibial	ENSG00000089250.18	NOS1	chr12	117208142	117452170	-	7654	1.05491	1273.21	415.529	2.48826e-10	chr12_117323839_T_C_b38	-128331	chr12	117323839	T	C	1	rs1843019	392	508	0.477444	1	2.51371e-11	0.187794	0.0274534	9.999e-05	1.3597e-07	1.1055e-07	0.000130805	0.383911	0.269026	0.49582
Nerve_Tibial	ENSG00000111725.10	PRKAB1	chr12	119667753	119681630	+	6702	1.04973	885.03	411.525	3.34014e-19	chr12_119667935_C_A_b38	182	chr12	119667935	C	A	1	rs6490266	283	336	0.315789	1	2.29038e-21	-0.234346	0.0234846	9.999e-05	4.88697e-17	7.52386e-17	0.000185878	-0.136957	-0.157644	-0.114232
Nerve_Tibial	ENSG00000183648.9	NDUFB1	chr14	92116122	92121917	-	8455	1.04943	1115.87	409.709	5.37711e-11	chr14_92114776_GT_G_b38	-7141	chr14	92114776	GT	G	1	rs35937758	305	359	0.337406	1	3.24597e-12	-0.158058	0.0220822	9.999e-05	2.58089e-08	2.22515e-08	0.000147324	-0.094948	-0.12578	-0.07473
Nerve_Tibial	ENSG00000137806.8	NDUFAF1	chr15	41387349	41402519	-	6332	1.03263	532.599	404.261	1.99316e-59	chr15_41380186_A_G_b38	-22333	chr15	41380186	A	G	1	rs7168431	208	237	0.222744	1	1.15993e-67	0.645156	0.0312215	9.999e-05	1.56175e-58	1.30248e-57	0.000296405	0.388805	0.353573	0.409217
Nerve_Tibial	ENSG00000140443.13	IGF1R	chr15	98648971	98964530	+	9669	1.04691	1554.88	412.078	1.26799e-18	chr15_98957027_G_A_b38	308056	chr15	98957027	G	A	1	rs2593053	335	421	0.395677	1	1.08452e-20	-0.271062	0.0276876	9.999e-05	3.94553e-16	5.74845e-16	0.000105099	-0.155869	-0.181896	-0.129073
Nerve_Tibial	ENSG00000140990.14	NDUFB10	chr16	1959508	1961975	+	8673	1.04902	1411.95	415.36	1.34665e-07	chr16_1961125_A_G_b38	1617	chr16	1961125	A	G	1	rs758335	163	178	0.167293	-1	2.68455e-08	0.158601	0.0280294	9.999e-05	0.000122267	7.4934e-05	0.00011632	0.082403	0.051972	0.109135
Nerve_Tibial	ENSG00000167720.12	SRR	chr17	2303383	2325260	+	8461	1.02961	1490.37	417.875	6.40089e-58	chr17_2304032_G_A_b38	649	chr17	2304032	G	A	1	rs3744270	276	333	0.31297	1	7.52372e-64	-0.751522	0.0378647	9.999e-05	2.36737e-56	1.85551e-55	0.000105156	-0.555543	-0.615195	-0.508112
Nerve_Tibial	ENSG00000142494.13	SLC47A1	chr17	19495385	19579034	+	4687	1.05069	452.991	398.96	1.3138e-31	chr17_19533874_T_C_b38	38489	chr17	19533874	T	C	1	rs2252281	262	317	0.343818	1	2.43497e-36	-0.60513	0.0439835	9.999e-05	2.15916e-30	6.46431e-30	0.000363944	-0.864848	-0.968735	-0.767724
Nerve_Tibial	ENSG00000131095.12	GFAP	chr17	44905391	44916937	-	6261	1.06594	540.226	394.753	2.54326e-08	chr17_44908455_T_C_b38	-8482	chr17	44908455	T	C	1	rs9915329	346	427	0.401316	1	1.67401e-09	0.226762	0.0368689	9.999e-05	6.37756e-06	4.46688e-06	0.00031629	0.532673	0.390667	0.698807
Nerve_Tibial	ENSG00000171298.12	GAA	chr17	80101556	80119879	+	9997	1.01237	1931.3	422.162	7.56727e-42	chr17_80101663_G_C_b38	107	chr17	80101663	G	C	1	rs2304849	202	222	0.208647	1	1.2332e-45	-0.614388	0.038686	9.999e-05	4.9474e-39	2.14432e-38	7.77478e-05	-0.371623	-0.433616	-0.337971
Nerve_Tibial	ENSG00000176105.13	YES1	chr18	721588	812546	-	7891	1.02553	1246.99	419.127	8.84775e-09	chr18_710265_C_T_b38	-102281	chr18	710265	C	T	1	rs11874788	137	147	0.138158	1	1.55277e-09	-0.202314	0.0328251	9.999e-05	8.15415e-06	5.64491e-06	0.000124425	-0.146485	-0.174906	-0.104833
Nerve_Tibial	ENSG00000174886.12	NDUFA11	chr19	5891276	5904006	-	8886	1.01918	1638.83	420.267	5.07775e-25	chr19_5895347_C_T_b38	-8659	chr19	5895347	C	T	1	rs72989070	149	160	0.150376	1	2.40504e-27	-0.298882	0.0258425	9.999e-05	3.25338e-22	6.67628e-22	9.31983e-05	-0.184442	-0.211877	-0.157327
Nerve_Tibial	ENSG00000105329.9	TGFB1	chr19	41301705	41353911	-	6467	1.03123	769.836	403.178	5.47863e-08	chr19_41284181_GTTATGGTA_G_b38	-69730	chr19	41284181	GTTATGGTA	G	1	rs138120077	133	148	0.139098	1	5.93897e-09	0.203748	0.0343588	9.999e-05	3.0379e-05	1.98686e-05	0.000204375	0.147187	0.106013	0.210737
Nerve_Tibial	ENSG00000130203.9	APOE	chr19	44905754	44909393	+	7861	1.07986	979.353	397.46	9.60849e-28	chr19_44935906_C_G_b38	30152	chr19	44935906	C	G	1	rs35136575	220	250	0.234962	1	5.53645e-32	0.560628	0.0440799	9.999e-05	1.09469e-26	2.78807e-26	0.000180146	0.868928	0.715924	0.992035
Nerve_Tibial	ENSG00000171051.8	FPR1	chr19	51745172	51804110	-	10609	1.03529	1694.86	413.928	2.22766e-37	chr19_51751943_A_G_b38	-52167	chr19	51751943	A	G	1	rs4802859	291	345	0.324248	-1	1.59564e-41	0.384943	0.0257401	9.999e-05	2.45945e-35	9.03356e-35	9.37598e-05	1.04	0.907275	1.22189
Nerve_Tibial	ENSG00000170906.15	NDUFA3	chr19	54102728	54109257	+	12746	1.00868	2788.42	427.824	2.65399e-38	chr19_54108427_A_G_b38	5699	chr19	54108427	A	G	1	rs75622830	112	116	0.109023	1	3.15668e-41	0.544054	0.0365442	9.999e-05	3.72614e-35	1.35922e-34	5.33504e-05	0.353534	0.319301	0.394721
Nerve_Tibial	ENSG00000105618.13	PRPF31	chr19	54115676	54131719	+	12708	1.03134	2480.69	419.319	4.48076e-09	chr19_54128561_A_G_b38	12885	chr19	54128561	A	G	1	rs667324	398	527	0.495301	-1	7.41345e-10	0.175583	0.027919	9.999e-05	7.66935e-06	5.32547e-06	6.34463e-05	0.068335	0.049757	0.085098
Nerve_Tibial	ENSG00000160194.17	NDUFV3	chr21	42879644	42913304	+	8344	1.03736	1357.31	416.905	2.1932e-25	chr21_42918300_G_A_b38	38656	chr21	42918300	G	A	1	rs2839606	364	482	0.453008	-1	5.88834e-28	0.428535	0.0365621	9.999e-05	4.59773e-23	9.87661e-23	0.000117664	0.166549	0.148776	0.189982
Nerve_Tibial	ENSG00000100030.14	MAPK1	chr22	21754500	21867680	-	8085	1.04577	1145.81	414.3	3.16639e-09	chr22_21774389_G_A_b38	-93291	chr22	21774389	G	A	1	rs2006893	368	486	0.456767	1	3.98062e-10	0.0913641	0.0142909	9.999e-05	2.00433e-06	1.47153e-06	0.000142229	0.048758	0.035209	0.062525
Nerve_Tibial	ENSG00000100191.5	SLC5A4	chr22	32218476	32255341	-	8455	1.06051	768.285	397.764	1.47984e-29	chr22_32351575_G_A_b38	96234	chr22	32351575	G	A	1	rs5754001	63	64	0.0601504	1	4.60537e-34	1.36877	0.103543	9.999e-05	2.97951e-28	8.15149e-28	0.000219625	1.9162	1.73182	2.02676
Nerve_Tibial	ENSG00000184983.9	NDUFA6	chr22	42085525	42090930	-	7183	1.06908	555.156	394.347	3.39637e-88	chr22_42084417_G_A_b38	-6513	chr22	42084417	G	A	1	rs139043947	40	40	0.037594	1	5.16994e-103	1.38776	0.04901	9.999e-05	2.56683e-91	5.91205e-90	0.000310027	0.889947	0.859527	0.922988
Nerve_Tibial	ENSG00000100197.20	CYP2D6	chr22	42126499	42130906	-	7271	1.03089	556.936	394.121	2.55808e-16	chr22_42138673_C_T_b38	7767	chr22	42138673	C	T	1	rs2743451	386	510	0.479323	-1	7.26112e-19	0.369835	0.0399059	9.999e-05	5.63792e-14	7.15677e-14	0.000282253	0.410885	0.331486	0.529967
Nerve_Tibial	ENSG00000147123.10	NDUFB11	chrX	47142216	47144868	-	3948	1.034	505.358	414.266	3.14827e-11	chrX_47140232_A_T_b38	-4636	chrX	47140232	A	T	1	rs5906341	241	409	0.384398	-1	2.34956e-12	0.107212	0.0148765	9.999e-05	8.51446e-09	7.66289e-09	0.000313423	0.06565	0.048261	0.083422
Nerve_Tibial	ENSG00000072506.12	HSD17B10	chrX	53431258	53434373	-	2292	1.04516	322.838	412.112	3.17752e-16	chrX_53352900_C_T_b38	-81473	chrX	53352900	C	T	1	rs2480441	290	486	0.456767	-1	5.28129e-18	-0.10857	0.0120442	9.999e-05	2.6056e-14	3.38156e-14	0.000503945	-0.090131	-0.112662	-0.076141
Nerve_Tibial	ENSG00000125356.6	NDUFA1	chrX	119871828	119876662	+	4918	1.05012	704.791	411.311	6.15805e-11	chrX_119793322_A_G_b38	-78506	chrX	119793322	A	G	1	rs2496211	309	532	0.5	1	4.16158e-12	-0.0816708	0.011471	9.999e-05	1.8154e-08	1.58227e-08	0.000233622	-0.059212	-0.078072	-0.044002
Nerve_Tibial	ENSG00000101966.12	XIAP	chrX	123859724	123913979	+	4159	1.0388	782.627	418.563	1.53663e-09	chrX_123905415_T_C_b38	45691	chrX	123905415	T	C	1	rs2269178	257	422	0.396617	-1	2.20243e-10	-0.135744	0.0209126	9.999e-05	6.96754e-07	5.35255e-07	0.000204766	-0.059852	-0.07659	-0.046232
Ovary	ENSG00000168653.10	NDUFS5	chr1	39026318	39034636	+	6847	1.03419	947.877	117.314	6.44435e-30	chr1_39028109_C_T_b38	1791	chr1	39028109	C	T	1	rs76289224	89	106	0.317365	1	2.941e-32	-0.748028	0.0467203	9.999e-05	7.6443e-28	8.8731e-26	2.74279e-05	-0.60461	-0.67162	-0.530173
Ovary	ENSG00000131791.7	PRKAB2	chr1	147155106	147172550	-	6380	1.04207	699.711	115.85	4.5679e-08	chr1_147206806_TGATGTAAATGACAAGTTAATG_T_b38	34256	chr1	147206806	TGATGTAAATGACAAGTTAATG	T	1	rs1366775344	122	161	0.482036	1	1.03146e-08	-0.341276	0.0556824	9.999e-05	2.03029e-05	0.00010935	3.83415e-05	-0.197034	-0.265684	-0.148183
Ovary	ENSG00000135917.13	SLC19A3	chr2	227685210	227718012	-	8882	1.04802	927.393	115.825	1.89047e-07	chr2_227718030_G_A_b38	18	chr2	227718030	G	A	1	rs4972919	84	102	0.305389	-1	4.86048e-08	0.412459	0.0710543	0.00029997	0.000113315	0.000521442	2.9615e-05	0.743511	0.536704	1.00481
Ovary	ENSG00000130414.11	NDUFA10	chr2	239892450	240025402	-	10077	1.03168	1708.49	118.579	5.07673e-18	chr2_240002286_C_A_b38	-23116	chr2	240002286	C	A	1	rs7609118	97	117	0.350299	1	3.40476e-19	-0.535013	0.0504742	9.999e-05	3.0677e-15	6.95271e-14	1.50644e-05	-0.236507	-0.278492	-0.18804
Ovary	ENSG00000157017.15	GHRL	chr3	10285747	10291451	-	7468	1.04426	1134.79	115.292	1.39801e-08	chr3_10333673_C_G_b38	42222	chr3	10333673	C	G	1	rs35675	98	115	0.344311	-1	2.58633e-09	0.528565	0.0824445	9.999e-05	9.54076e-06	5.47833e-05	2.38474e-05	0.918405	0.688326	1.18737
Ovary	ENSG00000123545.5	NDUFAF4	chr6	96889313	96897881	-	7110	1.03545	572.315	115.962	7.94852e-11	chr6_96799992_G_A_b38	-97889	chr6	96799992	G	A	1	rs392242	43	46	0.137725	1	1.00903e-11	0.566991	0.0756749	9.999e-05	2.46005e-08	2.17156e-07	4.56557e-05	0.438358	0.373161	0.527983
Ovary	ENSG00000146477.5	SLC22A3	chr6	160348268	160452581	+	8277	1.07061	782.965	112.713	1.22597e-13	chr6_160418318_C_T_b38	70050	chr6	160418318	C	T	1	rs10455782	85	102	0.305389	1	3.49828e-15	0.556131	0.0620796	9.999e-05	1.82485e-11	2.5239e-10	3.82616e-05	0.913287	0.759697	1.06574
Ovary	ENSG00000138207.13	RBP4	chr10	93591687	93601744	-	7289	1.04555	763.385	115.143	9.78841e-14	chr10_93596301_T_A_b38	-5443	chr10	93596301	T	A	1	rs11187544	33	33	0.0993976	1	5.31984e-15	1.32901	0.149616	9.999e-05	2.53236e-11	3.43361e-10	3.56298e-05	2.58883	2.26275	2.84205
Ovary	ENSG00000151366.12	NDUFC2	chr11	78068352	78080219	-	7061	1.04835	694.976	114.846	2.01787e-08	chr11_78157234_T_G_b38	77015	chr11	78157234	T	G	1	rs598282	47	50	0.149701	1	3.6113e-09	-0.423518	0.0667629	9.999e-05	7.99853e-06	4.66393e-05	3.95696e-05	-0.269689	-0.334957	-0.210377
Ovary	ENSG00000167720.12	SRR	chr17	2303383	2325260	+	8461	1.04442	1394.69	116.322	1.10344e-12	chr17_2305580_G_A_b38	2197	chr17	2305580	G	A	1	rs77530532	81	100	0.299401	1	1.02422e-13	-0.423212	0.0507099	9.999e-05	6.12892e-10	6.93271e-09	1.94158e-05	-0.617509	-0.760063	-0.492689
Ovary	ENSG00000142494.13	SLC47A1	chr17	19495385	19579034	+	4687	1.02331	515.609	117.128	1.23558e-10	chr17_19533874_T_C_b38	38489	chr17	19533874	T	C	1	rs2252281	78	93	0.327465	1	2.06042e-11	-0.55198	0.0750289	9.999e-05	4.28688e-08	3.63434e-07	4.82457e-05	-1.17625	-1.46693	-0.884557
Ovary	ENSG00000171298.12	GAA	chr17	80101556	80119879	+	9997	1.02821	1877.44	118.951	1.9323e-17	chr17_80101429_C_T_b38	-127	chr17	80101429	C	T	1	rs2304850	69	79	0.236527	1	1.61009e-18	-0.674432	0.0653162	9.999e-05	1.49685e-14	3.10365e-13	1.35176e-05	-0.781132	-0.897249	-0.620182
Ovary	ENSG00000130203.9	APOE	chr19	44905754	44909393	+	7861	1.01389	1220.45	120.017	3.88026e-14	chr19_44935906_C_G_b38	30152	chr19	44935906	C	G	1	rs35136575	80	92	0.275449	1	7.09639e-15	0.511865	0.0579632	9.999e-05	3.38407e-11	4.48083e-10	1.96059e-05	1.22238	0.973624	1.44237
Ovary	ENSG00000184983.9	NDUFA6	chr22	42085525	42090930	-	7183	1.04304	497.077	110.604	5.18168e-18	chr22_41918388_C_T_b38	-172542	chr22	41918388	C	T	1	rs8140914	9	10	0.0299401	1	1.84775e-20	1.39517	0.125544	9.999e-05	5.95404e-16	1.43312e-14	5.41779e-05	1.03029	0.933535	1.2923
Ovary	ENSG00000072506.12	HSD17B10	chrX	53431258	53434373	-	2292	1.06151	295.961	115.503	1.1968e-09	chrX_53504132_C_A_b38	69759	chrX	53504132	C	A	1	rs4830377	124	163	0.488024	-1	1.8019e-10	-0.276385	0.0398296	9.999e-05	1.38266e-07	1.06795e-06	9.77694e-05	-0.286179	-0.342813	-0.236996
Pancreas	ENSG00000168653.10	NDUFS5	chr1	39026318	39034636	+	6847	1.02561	965.032	226.782	4.82749e-49	chr1_39026790_C_T_b38	472	chr1	39026790	C	T	1	rs3768324	159	186	0.304918	1	6.85726e-54	-0.64637	0.0322708	9.999e-05	3.18125e-47	1.24193e-45	6.47441e-05	-0.405428	-0.437613	-0.360488
Pancreas	ENSG00000117394.20	SLC2A1	chr1	42925375	42959048	-	6088	1.02778	540.436	219.055	1.73149e-08	chr1_42946689_C_CCAAT_b38	-12359	chr1	42946689	C	CCAAT	1	rs145019373	88	97	0.159016	1	1.71499e-09	0.50423	0.0806177	9.999e-05	6.70279e-06	1.33634e-05	0.000116422	0.476122	0.341427	0.583393
Pancreas	ENSG00000085832.16	EPS15	chr1	51354263	51519328	-	4443	1.03685	266.985	218.884	3.96568e-15	chr1_51370670_G_A_b38	-148658	chr1	51370670	G	A	1	rs148648502	35	35	0.057377	1	4.5797e-17	0.751871	0.0832129	9.999e-05	3.77257e-13	1.55768e-12	0.000242598	0.360385	0.310545	0.407809
Pancreas	ENSG00000243480.7	AMY2A	chr1	103616811	103625780	+	8055	1.04777	458.452	214.368	1.09134e-10	chr1_103539198_C_T_b38	-77613	chr1	103539198	C	T	1	rs140234663	79	87	0.142623	1	3.15535e-12	-0.334366	0.0456075	9.999e-05	2.19504e-08	5.80876e-08	0.000146244	-4.031	-6.64386	-0.922345
Pancreas	ENSG00000134184.12	GSTM1	chr1	109687814	109693745	+	6623	1.03934	1009.96	225.098	6.02456e-14	chr1_109675302_G_A_b38	-12512	chr1	109675302	G	A	1	rs611951	86	95	0.155738	-1	2.51685e-15	-0.8437	0.0999121	9.999e-05	2.37082e-11	8.4175e-11	6.46499e-05	-4.87835	-5.53773	-4.06405
Pancreas	ENSG00000007933.12	FMO3	chr1	171090877	171117819	+	7905	1.0342	607.102	216.26	8.79112e-08	chr1_171115021_G_A_b38	24144	chr1	171115021	G	A	1	rs2236872	150	175	0.286885	1	8.75654e-09	0.369065	0.0619728	9.999e-05	3.75602e-05	6.73958e-05	0.0001058	0.695526	0.546181	0.837528
Pancreas	ENSG00000130414.11	NDUFA10	chr2	239892450	240025402	-	10077	1.03764	1669.37	226.904	1.63811e-26	chr2_240022777_C_A_b38	-2625	chr2	240022777	C	A	1	rs11679609	179	215	0.352459	1	4.77119e-29	-0.515764	0.0404241	9.999e-05	3.80677e-24	3.60568e-23	3.8903e-05	-0.220165	-0.259769	-0.193376
Pancreas	ENSG00000180767.9	CHST13	chr3	126524283	126543291	+	9352	1.05435	786.168	219.629	7.80759e-08	chr3_126515183_A_G_b38	-9100	chr3	126515183	A	G	1	rs10804576	208	285	0.467213	-1	9.94417e-09	0.381843	0.0643755	9.999e-05	3.53782e-05	6.3718e-05	8.70501e-05	1.02026	0.682178	1.24
Pancreas	ENSG00000170606.14	HSPA4	chr5	133051962	133106449	+	6836	1.05758	849.57	219.824	6.31536e-09	chr5_133091159_GTT_G_b38	39197	chr5	133091159	GTT	G	1	rs147133967	38	41	0.0672131	1	5.83366e-10	-0.397826	0.0617049	9.999e-05	2.6009e-06	5.41929e-06	8.13611e-05	-0.245897	-0.304492	-0.154904
Pancreas	ENSG00000112164.5	GLP1R	chr6	39048798	39087743	+	7753	1.04762	872.99	221.033	2.70665e-11	chr6_39064045_A_G_b38	15247	chr6	39064045	A	G	1	rs880347	181	212	0.347541	1	1.38336e-12	-0.433333	0.0580493	9.999e-05	1.00289e-08	2.75403e-08	7.6769e-05	-0.480153	-0.58831	-0.417733
Pancreas	ENSG00000122585.7	NPY	chr7	24284163	24291865	+	8395	1.05353	806.128	215.21	7.73335e-12	chr7_24366900_A_C_b38	82737	chr7	24366900	A	C	1	rs1107376	185	222	0.363934	1	1.61894e-13	-0.494857	0.0633961	9.999e-05	2.21489e-09	6.53138e-09	8.46796e-05	-1.61567	-2.04669	-1.31856
Pancreas	ENSG00000090266.12	NDUFB2	chr7	140696821	140706646	+	6210	1.0345	870.051	226.001	8.15301e-16	chr7_140681373_G_A_b38	-15448	chr7	140681373	G	A	1	rs2930319	103	126	0.206557	1	2.46469e-17	-0.480158	0.0526189	9.999e-05	2.66231e-13	1.11465e-12	7.38977e-05	-0.24746	-0.291169	-0.207244
Pancreas	ENSG00000257743.8	MGAM2	chr7	142111749	142222324	+	6778	1.03997	827.955	225.537	7.50394e-11	chr7_142104014_G_A_b38	-7735	chr7	142104014	G	A	1	rs62479375	141	165	0.270492	1	7.13459e-12	-0.387597	0.0538494	9.999e-05	3.14546e-08	8.20363e-08	7.90183e-05	-0.435119	-0.521767	-0.344705
Pancreas	ENSG00000153707.16	PTPRD	chr9	8314246	10612723	-	11646	1.03515	1151.36	220.667	5.16449e-20	chr9_10341235_C_G_b38	-271488	chr9	10341235	C	G	1	rs10809070	116	136	0.222951	1	1.81494e-22	0.810322	0.0752432	9.999e-05	1.57512e-17	9.38861e-17	5.59593e-05	1.27361	1.11011	1.42167
Pancreas	ENSG00000196730.12	DAPK1	chr9	87497228	87708633	+	8691	1.02369	1097.9	224.243	3.68649e-09	chr9_87432931_G_A_b38	-64297	chr9	87432931	G	A	1	rs7857985	212	280	0.459016	-1	4.72764e-10	-0.270512	0.0417177	9.999e-05	2.98538e-06	6.18534e-06	5.6555e-05	-0.196822	-0.281207	-0.128674
Pancreas	ENSG00000136877.14	FPGS	chr9	127794597	127814327	+	5342	1.03007	731.528	226.135	1.84151e-11	chr9_127820895_A_G_b38	26298	chr9	127820895	A	G	1	rs34116890	185	232	0.380328	1	1.61312e-12	0.228519	0.0307144	9.999e-05	7.7107e-09	2.14806e-08	8.66496e-05	0.139279	0.102951	0.163598
Pancreas	ENSG00000171862.10	PTEN	chr10	87863438	87971930	+	5832	1.02584	713.891	222.888	7.1563e-25	chr10_88291278_G_T_b38	427840	chr10	88291278	G	T	1	rs7068821	137	158	0.259016	1	1.05368e-27	0.484772	0.039223	9.999e-05	1.42318e-22	1.19287e-21	8.75844e-05	0.249032	0.215421	0.271027
Pancreas	ENSG00000174775.16	HRAS	chr11	532242	537287	-	6400	1.07466	757.105	216.357	5.01715e-15	chr11_524397_T_C_b38	-12890	chr11	524397	T	C	1	rs4963184	171	206	0.337705	1	3.95341e-17	-0.324078	0.0357827	9.999e-05	5.15906e-13	2.1031e-12	9.61551e-05	-0.20005	-0.239184	-0.15909
Pancreas	ENSG00000187486.5	KCNJ11	chr11	17385859	17389331	-	6662	1.03205	755.465	224.316	7.54455e-12	chr11_17414389_G_A_b38	25058	chr11	17414389	G	A	1	rs4148631	138	165	0.270492	-1	4.86162e-13	0.28579	0.0374454	9.999e-05	3.05938e-09	8.88858e-09	8.44401e-05	0.370076	0.27365	0.435782
Pancreas	ENSG00000167792.11	NDUFV1	chr11	67606852	67612535	+	6269	1.0726	514.935	212.427	1.98973e-09	chr11_67607110_T_C_b38	258	chr11	67607110	T	C	1	rs1871043	202	255	0.418033	1	7.58049e-11	0.230489	0.0338869	9.999e-05	3.64478e-07	8.38325e-07	0.000140499	0.095415	0.073438	0.117955
Pancreas	ENSG00000151366.12	NDUFC2	chr11	78068352	78080219	-	7061	1.04446	658.088	218.079	2.04085e-11	chr11_78072265_C_A_b38	-7954	chr11	78072265	C	A	1	rs546077	89	104	0.170492	-1	7.07706e-13	0.373148	0.0492776	9.999e-05	5.88463e-09	1.65746e-08	0.000100832	0.182475	0.137351	0.21992
Pancreas	ENSG00000076555.15	ACACB	chr12	109116595	109268226	+	6984	1.04947	837.122	222.217	7.05692e-17	chr12_109139930_C_T_b38	23335	chr12	109139930	C	T	1	rs2878960	189	242	0.396721	-1	8.47902e-19	0.353172	0.036766	9.999e-05	1.2811e-14	5.98215e-14	8.0522e-05	0.277336	0.231271	0.338346
Pancreas	ENSG00000089250.18	NOS1	chr12	117208142	117452170	-	7654	1.04726	1180.36	223.389	6.85496e-12	chr12_117408296_A_C_b38	-43874	chr12	117408296	A	C	1	rs12309595	78	87	0.142623	1	3.91e-13	-0.464451	0.0605798	9.999e-05	3.28548e-09	9.50723e-09	5.67151e-05	-0.787764	-0.959709	-0.643376
Pancreas	ENSG00000111725.10	PRKAB1	chr12	119667753	119681630	+	6702	1.06055	887.767	223.364	1.08531e-08	chr12_119709120_G_A_b38	41367	chr12	119709120	G	A	1	rs11064881	39	39	0.0639344	1	1.45926e-09	0.507722	0.0808001	9.999e-05	4.66138e-06	9.46325e-06	7.85739e-05	0.4003	0.296298	0.495694
Pancreas	ENSG00000183648.9	NDUFB1	chr14	92116122	92121917	-	8455	1.04745	1103.33	222.107	1.60941e-14	chr14_92114776_GT_G_b38	-7141	chr14	92114776	GT	G	1	rs35937758	175	210	0.344262	1	3.71798e-16	-0.290948	0.0333308	9.999e-05	5.37333e-12	2.01771e-11	6.07106e-05	-0.186177	-0.223717	-0.137533
Pancreas	ENSG00000137806.8	NDUFAF1	chr15	41387349	41402519	-	6332	1.04206	515.59	217.883	8.45286e-34	chr15_41378210_C_G_b38	-24309	chr15	41378210	C	G	1	rs28584379	129	151	0.247541	1	1.53742e-38	0.827445	0.0532747	9.999e-05	2.26213e-32	3.61718e-31	0.000127727	0.546752	0.484545	0.596601
Pancreas	ENSG00000140675.12	SLC5A2	chr16	31483002	31489338	+	3566	1.04302	345.488	216.846	1.48798e-11	chr16_31484552_G_A_b38	1550	chr16	31484552	G	A	1	rs9934336	139	163	0.267213	1	4.2373e-13	0.566023	0.073951	9.999e-05	2.21977e-09	6.54354e-09	0.000191182	0.93623	0.704004	1.11754
Pancreas	ENSG00000167720.12	SRR	chr17	2303383	2325260	+	8461	1.03957	1532.35	227.612	2.22545e-29	chr17_2304032_G_A_b38	649	chr17	2304032	G	A	1	rs3744270	149	176	0.288525	1	4.13789e-32	-0.826826	0.0605282	9.999e-05	3.29253e-27	3.84572e-26	4.26421e-05	-0.552265	-0.644	-0.461064
Pancreas	ENSG00000171298.12	GAA	chr17	80101556	80119879	+	9997	1.03365	1906.01	228.406	1.12885e-17	chr17_80096472_G_GCTA_b38	-5084	chr17	80096472	G	GCTA	1	rs35306116	138	157	0.257377	1	3.35715e-19	-0.648825	0.0666402	9.999e-05	7.35361e-15	3.5075e-14	3.36421e-05	-0.380003	-0.461774	-0.317145
Pancreas	ENSG00000174886.12	NDUFA11	chr19	5891276	5904006	-	8886	1.03739	1522.84	225.708	7.77862e-12	chr19_5884662_C_T_b38	-19344	chr19	5884662	C	T	1	rs6510861	168	198	0.32459	-1	5.92749e-13	0.249923	0.0328818	9.999e-05	5.89062e-09	1.65861e-08	4.26123e-05	0.118828	0.094041	0.143444
Pancreas	ENSG00000170906.15	NDUFA3	chr19	54102728	54109257	+	12746	1.04501	2429.31	226.611	1.07854e-12	chr19_54109321_G_A_b38	6593	chr19	54109321	G	A	1	rs254262	142	163	0.267213	1	7.47399e-14	0.320133	0.0403876	9.999e-05	1.05572e-09	3.21602e-09	2.73638e-05	0.187345	0.14135	0.220946
Pancreas	ENSG00000160194.17	NDUFV3	chr21	42879644	42913304	+	8344	1.03583	1210.8	223.242	1.4688e-35	chr21_42876059_A_G_b38	-3585	chr21	42876059	A	G	1	rs71320568	101	115	0.188525	1	1.26579e-39	0.822693	0.0519171	9.999e-05	1.27594e-33	2.28003e-32	5.33279e-05	0.453424	0.400543	0.497822
Pancreas	ENSG00000184983.9	NDUFA6	chr22	42085525	42090930	-	7183	1.03934	533.756	213.513	4.55565e-36	chr22_42155833_T_C_b38	64903	chr22	42155833	T	C	1	rs4822094	20	21	0.0347682	-1	5.98781e-42	-1.54243	0.093361	9.999e-05	1.24603e-34	2.34759e-33	0.000122323	-0.851968	-0.948591	-0.802763
Pancreas	ENSG00000100197.20	CYP2D6	chr22	42126499	42130906	-	7271	1.07411	521.549	210.046	1.52668e-18	chr22_42142093_C_T_b38	11187	chr22	42142093	C	T	1	rs3021083	215	270	0.442623	-1	8.90608e-22	0.618484	0.0586009	9.999e-05	5.85774e-17	3.35318e-16	0.000139347	0.838474	0.688978	1.00964
Pancreas	ENSG00000072506.12	HSD17B10	chrX	53431258	53434373	-	2292	1.02011	350.668	232.788	2.36023e-27	chrX_53434412_G_C_b38	39	chrX	53434412	G	C	1	rs1264014	170	284	0.465574	-1	2.94496e-29	-0.287659	0.0224367	9.999e-05	2.69011e-25	2.79548e-24	0.000174995	-0.223391	-0.244174	-0.202021
Pituitary	ENSG00000168653.10	NDUFS5	chr1	39026318	39034636	+	6847	1.03513	916.998	180.455	2.09108e-32	chr1_39026790_C_T_b38	472	chr1	39026790	C	T	1	rs3768324	116	138	0.291139	1	3.14392e-35	-0.578767	0.0379194	9.999e-05	1.85038e-30	5.1629e-29	5.2485e-05	-0.348273	-0.386863	-0.292283
Pituitary	ENSG00000134184.12	GSTM1	chr1	109687814	109693745	+	6623	1.0185	895.597	179.435	6.45766e-08	chr1_109713453_A_G_b38	25639	chr1	109713453	A	G	1	rs2479390	88	105	0.221519	1	1.47253e-08	-0.600101	0.101515	9.999e-05	4.79005e-05	0.000121389	5.06987e-05	-4.67795	-5.21259	-3.93627
Pituitary	ENSG00000007933.12	FMO3	chr1	171090877	171117819	+	7905	1.01372	601.699	177.723	2.96879e-23	chr1_171119633_A_AC_b38	28756	chr1	171119633	A	AC	1	rs56677244	165	208	0.438819	-1	1.31873e-25	0.67464	0.0556893	9.999e-05	9.51428e-21	1.19809e-19	7.41854e-05	1.62755	1.4178	1.85182
Pituitary	ENSG00000023228.13	NDUFS1	chr2	206114817	206159584	-	6870	1.04251	778.11	175.011	6.738e-09	chr2_206088333_A_G_b38	-71251	chr2	206088333	A	G	1	rs12694039	170	227	0.478903	1	7.66451e-10	-0.244849	0.0378542	0.00019998	3.06925e-06	9.35439e-06	6.34389e-05	-0.126934	-0.159408	-0.095386
Pituitary	ENSG00000130414.11	NDUFA10	chr2	239892450	240025402	-	10077	1.05241	1283.51	174.53	3.29409e-18	chr2_240018384_G_A_b38	-7018	chr2	240018384	G	A	1	rs10804402	66	70	0.147679	1	2.34233e-20	-0.758193	0.0731789	9.999e-05	7.29136e-16	6.13755e-15	3.97693e-05	-0.320704	-0.373645	-0.275485
Pituitary	ENSG00000157017.15	GHRL	chr3	10285747	10291451	-	7468	1.03563	1081.13	177.704	7.71295e-12	chr3_10273419_G_T_b38	-18032	chr3	10273419	G	T	1	rs164938	166	204	0.43038	1	5.73051e-13	0.493821	0.0639683	9.999e-05	4.23187e-09	1.86462e-08	4.45941e-05	0.731688	0.60249	0.881026
Pituitary	ENSG00000180767.9	CHST13	chr3	126524283	126543291	+	9352	1.04107	763.215	176.492	6.706e-15	chr3_126524576_A_C_b38	293	chr3	126524576	A	C	1	rs7613347	166	211	0.445148	1	1.85295e-16	-0.580941	0.0645096	9.999e-05	1.72849e-12	1.07659e-11	6.43597e-05	-1.80145	-2.14999	-1.39238
Pituitary	ENSG00000114770.16	ABCC5	chr3	183919934	184018015	-	7604	1.04446	968.577	177.55	2.65852e-08	chr3_183922361_GA_G_b38	-95654	chr3	183922361	GA	G	1	rs60053269	162	216	0.455696	1	4.62533e-09	0.27428	0.0447192	9.999e-05	1.57869e-05	4.31825e-05	5.13039e-05	0.243156	0.176391	0.330301
Pituitary	ENSG00000133710.15	SPINK5	chr5	148025683	148137289	+	7805	1.05069	797.612	177.358	5.16238e-11	chr5_148014061_C_T_b38	-11622	chr5	148014061	C	T	1	rs1422998	155	193	0.407173	-1	4.47885e-12	-0.648076	0.0878823	9.999e-05	1.70063e-08	6.88097e-08	6.36262e-05	-1.42035	-1.83238	-0.967303
Pituitary	ENSG00000123545.5	NDUFAF4	chr6	96889313	96897881	-	7110	1.04197	469.005	173.298	2.01292e-07	chr6_96906443_G_A_b38	8562	chr6	96906443	G	A	1	rs12202527	53	56	0.118143	1	2.97044e-08	0.40311	0.0698109	9.999e-05	6.28229e-05	0.000155864	0.000105052	0.303376	0.24831	0.419511
Pituitary	ENSG00000146477.5	SLC22A3	chr6	160348268	160452581	+	8277	1.06246	742.411	173.241	2.3471e-10	chr6_160414160_C_A_b38	65892	chr6	160414160	C	A	1	rs1112444	112	138	0.291139	1	1.39482e-11	0.364722	0.0507984	9.999e-05	6.41296e-08	2.42184e-07	7.10897e-05	0.846892	0.700746	1.04566
Pituitary	ENSG00000257335.8	MGAM	chr7	141907813	142106747	+	6643	1.03511	713.597	178.012	2.06043e-10	chr7_141787249_T_C_b38	-120564	chr7	141787249	T	C	1	rs13308329	172	233	0.491561	1	2.26087e-11	-0.483212	0.0680944	9.999e-05	8.33501e-08	3.09978e-07	6.74396e-05	-1.03165	-1.21385	-0.749817
Pituitary	ENSG00000174775.16	HRAS	chr11	532242	537287	-	6400	1.03982	819.658	176.761	1.61848e-10	chr11_486414_G_A_b38	-50873	chr11	486414	G	A	1	rs71487293	44	46	0.0970464	1	1.46986e-11	-0.514433	0.0717404	9.999e-05	6.93999e-08	2.60744e-07	5.96723e-05	-0.330273	-0.433821	-0.26548
Pituitary	ENSG00000167792.11	NDUFV1	chr11	67606852	67612535	+	6269	1.04841	548.549	174.395	6.28022e-09	chr11_67616086_C_T_b38	9234	chr11	67616086	C	T	1	rs56092845	168	225	0.474684	-1	6.61057e-10	-0.269959	0.0415624	9.999e-05	1.83451e-06	5.75882e-06	9.18044e-05	-0.095754	-0.118538	-0.071782
Pituitary	ENSG00000151366.12	NDUFC2	chr11	78068352	78080219	-	7061	1.05088	626.505	175.53	7.16539e-16	chr11_78036787_C_T_b38	-43432	chr11	78036787	C	T	1	rs10751279	169	223	0.470464	1	1.25109e-17	0.362097	0.0384414	9.999e-05	1.03324e-13	7.20276e-13	8.10538e-05	0.157809	0.12047	0.192441
Pituitary	ENSG00000167720.12	SRR	chr17	2303383	2325260	+	8461	1.03491	1494.61	182.34	1.43045e-21	chr17_2304032_G_A_b38	649	chr17	2304032	G	A	1	rs3744270	136	164	0.345992	1	3.51545e-23	-0.635148	0.0561535	9.999e-05	5.08764e-19	5.58185e-18	3.21776e-05	-0.567091	-0.637862	-0.489657
Pituitary	ENSG00000171298.12	GAA	chr17	80101556	80119879	+	9997	1.00995	1830.12	183.168	1.0178e-20	chr17_80102793_A_C_b38	1237	chr17	80102793	A	C	1	rs12450199	137	168	0.35443	1	3.62795e-22	-0.541642	0.0493655	9.999e-05	1.26448e-17	1.23148e-16	2.40629e-05	-0.344659	-0.400489	-0.285984
Pituitary	ENSG00000170906.15	NDUFA3	chr19	54102728	54109257	+	12746	1.03167	2417.39	182.533	1.64835e-22	chr19_54108427_A_G_b38	5699	chr19	54108427	A	G	1	rs75622830	52	56	0.118143	1	3.60202e-24	0.687923	0.0591012	9.999e-05	1.02738e-19	1.1939e-18	1.96727e-05	0.417498	0.356589	0.478094
Pituitary	ENSG00000160194.17	NDUFV3	chr21	42879644	42913304	+	8344	1.03769	1099.29	176.607	2.58806e-15	chr21_42903610_C_T_b38	23966	chr21	42903610	C	T	1	rs4148974	26	27	0.056962	1	6.56154e-17	-1.08474	0.118347	9.999e-05	1.02749e-12	6.57865e-12	4.41697e-05	-0.458208	-0.584509	-0.367336
Pituitary	ENSG00000100191.5	SLC5A4	chr22	32218476	32255341	-	8455	1.05657	674.104	171.144	2.8763e-09	chr22_32386141_A_C_b38	130800	chr22	32386141	A	C	1	rs2281034	33	33	0.0696203	1	1.85939e-10	0.917785	0.136478	9.999e-05	8.9867e-07	2.92636e-06	7.6779e-05	2.04493	1.65443	2.40715
Pituitary	ENSG00000184983.9	NDUFA6	chr22	42085525	42090930	-	7183	1.04723	471.667	170.528	7.45918e-44	chr22_42084417_G_A_b38	-6513	chr22	42084417	G	A	1	rs139043947	22	23	0.0485232	1	2.10084e-50	1.58063	0.0775565	9.999e-05	4.23286e-43	2.8548e-41	0.000106342	0.787137	0.754442	0.825185
Pituitary	ENSG00000100197.20	CYP2D6	chr22	42126499	42130906	-	7271	1.0576	496.171	170.797	6.77436e-37	chr22_42138139_T_C_b38	7233	chr22	42138139	T	C	1	rs2743449	168	216	0.455696	-1	2.63995e-42	0.954684	0.0542228	9.999e-05	3.8662e-36	1.61606e-34	0.000104668	1.08521	0.976322	1.19227
Pituitary	ENSG00000147123.10	NDUFB11	chrX	47142216	47144868	-	3948	1.02938	490.573	185.611	3.58069e-09	chrX_47352820_G_A_b38	207952	chrX	47352820	G	A	1	rs2474315	96	167	0.352321	1	1.19181e-09	0.226115	0.0354025	9.999e-05	1.17509e-06	3.77945e-06	9.61656e-05	0.107095	0.070594	0.146986
Prostate	ENSG00000168653.10	NDUFS5	chr1	39026318	39034636	+	6847	1.05749	889.972	162.228	1.07092e-43	chr1_38996470_CT_C_b38	-29848	chr1	38996470	CT	C	1	rs35363657	110	131	0.29638	1	1.45985e-48	-0.681384	0.033542	9.999e-05	4.64843e-43	8.1057e-41	4.65953e-05	-0.620271	-0.675522	-0.571724
Prostate	ENSG00000085832.16	EPS15	chr1	51354263	51519328	-	4443	1.04794	243.442	158.799	2.10972e-08	chr1_51370670_G_A_b38	-148658	chr1	51370670	G	A	1	rs148648502	18	19	0.0429864	1	2.19432e-09	0.62795	0.099667	9.999e-05	2.80523e-06	1.1863e-05	0.00016464	0.319243	0.267376	0.414258
Prostate	ENSG00000094963.13	FMO2	chr1	171185208	171211230	+	7658	1.06158	602.322	158.569	2.57416e-07	chr1_171119633_A_AC_b38	-65575	chr1	171119633	A	AC	1	rs56677244	149	185	0.418552	-1	3.67828e-08	0.372785	0.0647995	9.999e-05	8.79098e-05	0.000287452	6.98416e-05	0.9386	0.662039	1.19455
Prostate	ENSG00000130414.11	NDUFA10	chr2	239892450	240025402	-	10077	1.03404	1649.93	165.216	5.90333e-25	chr2_239959194_A_AT_b38	-66208	chr2	239959194	A	AT	1	rs138899326	57	62	0.140271	1	3.44377e-27	-0.955646	0.0745408	9.999e-05	1.8488e-22	4.40868e-21	2.31026e-05	-0.357414	-0.421294	-0.303214
Prostate	ENSG00000180767.9	CHST13	chr3	126524283	126543291	+	9352	1.04815	750.101	160.726	1.61178e-22	chr3_126524121_G_C_b38	-162	chr3	126524121	G	C	1	rs1388096	150	203	0.459276	1	3.65606e-25	-0.780427	0.0643428	9.999e-05	1.45354e-20	2.93336e-19	5.34799e-05	-2.63097	-2.96147	-2.37809
Prostate	ENSG00000090402.7	SI	chr3	164978898	165078495	-	7407	1.05822	400.997	157.65	5.01233e-08	chr3_165056154_C_T_b38	-22341	chr3	165056154	C	T	1	rs12494492	147	192	0.434389	-1	5.16453e-09	0.398374	0.064909	9.999e-05	1.04374e-05	4.01245e-05	0.000103673	1.53891	1.12826	1.86626
Prostate	ENSG00000146477.5	SLC22A3	chr6	160348268	160452581	+	8277	1.04301	790.18	160.125	2.30931e-07	chr6_160160511_T_TG_b38	-187757	chr6	160160511	T	TG	1	rs4646284	121	137	0.309955	1	3.79021e-08	-0.304507	0.0529863	9.999e-05	0.000123656	0.000393724	4.98381e-05	-0.612378	-0.878563	-0.46316
Prostate	ENSG00000138115.13	CYP2C8	chr10	95036772	95069497	-	7085	1.06384	472.986	158.304	2.60156e-08	chr10_95241720_T_C_b38	172223	chr10	95241720	T	C	1	rs11188247	74	78	0.176471	1	2.63032e-09	-0.508643	0.0811729	0.00019998	5.81269e-06	2.33512e-05	8.96421e-05	-0.894337	-1.33282	-0.607414
Prostate	ENSG00000174775.16	HRAS	chr11	532242	537287	-	6400	1.0396	828.568	162.564	8.56783e-08	chr11_534242_A_G_b38	-3045	chr11	534242	A	G	1	rs12628	115	137	0.309955	1	1.5943e-08	-0.216757	0.0366234	9.999e-05	4.77965e-05	0.000163823	4.6946e-05	-0.197526	-0.252419	-0.145253
Prostate	ENSG00000006071.12	ABCC8	chr11	17392885	17476845	-	6843	1.04734	805.098	164.367	1.13475e-11	chr11_17476510_G_A_b38	-335	chr11	17476510	G	A	1	rs77889556	56	60	0.135747	1	1.045e-12	0.600504	0.0783312	9.999e-05	3.72576e-09	2.42164e-08	4.96825e-05	1.29337	1.0165	1.55879
Prostate	ENSG00000167792.11	NDUFV1	chr11	67606852	67612535	+	6269	1.0413	573.478	160.779	4.88005e-11	chr11_67592132_T_G_b38	-14720	chr11	67592132	T	G	1	rs596603	163	209	0.472851	-1	3.01694e-12	-0.369608	0.0493804	9.999e-05	1.34038e-08	8.04228e-08	6.82461e-05	-0.174512	-0.208065	-0.133438
Prostate	ENSG00000137806.8	NDUFAF1	chr15	41387349	41402519	-	6332	1.0463	477.185	156.961	4.50058e-08	chr15_41388035_G_A_b38	-14484	chr15	41388035	G	A	1	rs8034840	89	105	0.237557	1	4.22407e-09	0.33173	0.0537132	9.999e-05	1.27945e-05	4.85009e-05	8.35083e-05	0.24906	0.182822	0.311908
Prostate	ENSG00000167720.12	SRR	chr17	2303383	2325260	+	8461	1.0504	1420.05	164.791	9.30366e-25	chr17_2304032_G_A_b38	649	chr17	2304032	G	A	1	rs3744270	116	135	0.30543	1	4.87484e-27	-0.845116	0.0661849	9.999e-05	1.14556e-22	2.77923e-21	2.8478e-05	-0.660874	-0.76586	-0.561866
Prostate	ENSG00000171298.12	GAA	chr17	80101556	80119879	+	9997	1.0433	1818.19	166.117	6.78701e-17	chr17_80101429_C_T_b38	-127	chr17	80101429	C	T	1	rs2304850	89	95	0.214932	1	2.83703e-18	-0.677077	0.0695571	9.999e-05	3.34284e-14	3.77975e-13	2.16828e-05	-0.454412	-0.547902	-0.359399
Prostate	ENSG00000174886.12	NDUFA11	chr19	5891276	5904006	-	8886	1.01775	1689.8	169.033	4.16751e-09	chr19_5895347_C_T_b38	-8659	chr19	5895347	C	T	1	rs72989070	68	75	0.169683	1	1.18343e-09	-0.324592	0.0505865	9.999e-05	5.66212e-06	2.27955e-05	2.12317e-05	-0.167284	-0.203252	-0.118856
Prostate	ENSG00000130203.9	APOE	chr19	44905754	44909393	+	7861	1.05161	1155.44	165.286	5.81636e-10	chr19_44996130_T_C_b38	90376	chr19	44996130	T	C	1	rs56784978	128	155	0.350679	1	8.93381e-11	0.456226	0.0662175	9.999e-05	3.1552e-07	1.55874e-06	3.51507e-05	0.984697	0.754735	1.24423
Prostate	ENSG00000170906.15	NDUFA3	chr19	54102728	54109257	+	12746	1.01024	2508.06	168.008	1.04135e-12	chr19_54108427_A_G_b38	5699	chr19	54108427	A	G	1	rs75622830	43	45	0.10181	1	1.403e-13	0.571782	0.0714356	9.999e-05	2.12387e-09	1.41338e-08	1.39028e-05	0.380513	0.286359	0.449638
Prostate	ENSG00000160194.17	NDUFV3	chr21	42879644	42913304	+	8344	1.0235	1350.22	166.135	1.33711e-12	chr21_42903610_C_T_b38	23966	chr21	42903610	C	T	1	rs4148974	24	24	0.0542986	1	1.34424e-13	-0.872191	0.10887	9.999e-05	1.11349e-09	7.65653e-09	2.71509e-05	-0.520504	-0.699584	-0.407949
Prostate	ENSG00000184983.9	NDUFA6	chr22	42085525	42090930	-	7183	1.05381	549.942	158.446	4.0265e-26	chr22_42084417_G_A_b38	-6513	chr22	42084417	G	A	1	rs139043947	17	18	0.040724	1	1.29277e-29	1.08906	0.0798065	9.999e-05	1.30605e-24	3.81558e-23	7.44284e-05	0.777739	0.669266	0.841191
Prostate	ENSG00000100197.20	CYP2D6	chr22	42126499	42130906	-	7271	1.0641	542.121	155.441	9.0634e-26	chr22_42138673_C_T_b38	7767	chr22	42138673	C	T	1	rs2743451	162	210	0.475113	-1	9.54192e-30	0.59321	0.0433277	9.999e-05	1.7742e-24	5.15627e-23	7.82823e-05	0.937722	0.863031	1.05941
Skin_Not_Sun_Exposed_Suprapubic	ENSG00000162551.13	ALPL	chr1	21509372	21578412	+	7957	1.0218	946.976	398.415	1.05844e-15	chr1_21496799_C_T_b38	-12573	chr1	21496799	C	T	1	rs1697421	381	493	0.476789	1	1.9727e-17	-0.232311	0.0262337	9.999e-05	5.43746e-13	8.69545e-13	0.000149119	-0.588482	-0.747343	-0.474146
Skin_Not_Sun_Exposed_Suprapubic	ENSG00000168653.10	NDUFS5	chr1	39026318	39034636	+	6847	1.04312	955.479	399.201	2.74368e-134	chr1_39026790_C_T_b38	472	chr1	39026790	C	T	1	rs3768324	251	296	0.286267	1	3.82515e-150	-0.729454	0.0181937	9.999e-05	6.02754e-137	1.69867e-134	0.00015591	-0.525561	-0.546228	-0.495142
Skin_Not_Sun_Exposed_Suprapubic	ENSG00000117394.20	SLC2A1	chr1	42925375	42959048	-	6088	1.05345	513.778	383.748	9.89509e-11	chr1_43007582_C_T_b38	48534	chr1	43007582	C	T	1	rs6656620	258	307	0.308853	1	2.91098e-12	-0.184541	0.0256989	9.999e-05	2.0239e-08	2.20329e-08	0.000297341	-0.285989	-0.375333	-0.207997
Skin_Not_Sun_Exposed_Suprapubic	ENSG00000085832.16	EPS15	chr1	51354263	51519328	-	4443	1.03795	233.013	377.211	5.78574e-45	chr1_51370670_G_A_b38	-148658	chr1	51370670	G	A	1	rs148648502	52	53	0.0512573	1	5.7827e-53	1.13911	0.0648006	9.999e-05	3.41802e-44	2.45844e-43	0.000630993	0.578352	0.520063	0.663942
Skin_Not_Sun_Exposed_Suprapubic	ENSG00000134184.12	GSTM1	chr1	109687814	109693745	+	6623	1.02645	979.277	398.426	3.23867e-13	chr1_109675302_G_A_b38	-12512	chr1	109675302	G	A	1	rs611951	150	164	0.158607	-1	1.20172e-14	-0.632922	0.0792663	9.999e-05	1.75809e-10	2.29622e-10	0.000145915	-4.32582	-4.97622	-3.62938
Skin_Not_Sun_Exposed_Suprapubic	ENSG00000131791.7	PRKAB2	chr1	147155106	147172550	-	6380	1.02861	703.497	397.324	2.50632e-27	chr1_147197315_T_C_b38	24765	chr1	147197315	T	C	1	rs718369	260	311	0.300774	1	1.53507e-30	-0.254514	0.0205304	9.999e-05	3.64283e-25	1.21167e-24	0.00020422	-0.248707	-0.286536	-0.220834
Skin_Not_Sun_Exposed_Suprapubic	ENSG00000158864.12	NDUFS2	chr1	161197104	161214395	+	7456	1.04321	856.964	394.257	3.05003e-12	chr1_161210087_G_A_b38	12983	chr1	161210087	G	A	1	rs4656994	188	208	0.201161	1	1.10347e-13	-0.233137	0.0304054	9.999e-05	1.09199e-09	1.33117e-09	0.000173869	-0.107377	-0.123595	-0.082126
Skin_Not_Sun_Exposed_Suprapubic	ENSG00000198929.12	NOS1AP	chr1	162069774	162370475	+	7637	1.04867	920.583	394.421	6.39348e-12	chr1_162381664_A_G_b38	311890	chr1	162381664	A	G	1	rs12407972	170	187	0.180851	1	2.57836e-13	-0.416658	0.055233	9.999e-05	2.29065e-09	2.71135e-09	0.00016404	-0.658914	-0.853386	-0.51281
Skin_Not_Sun_Exposed_Suprapubic	ENSG00000007933.12	FMO3	chr1	171090877	171117819	+	7905	1.04598	655.941	391.496	3.08897e-07	chr1_171094410_A_T_b38	3533	chr1	171094410	A	T	1	rs28745584	69	73	0.0705996	1	4.5222e-08	0.478612	0.0860021	0.00019998	0.000134301	9.91623e-05	0.0002287	0.825296	0.622743	1.02876
Skin_Not_Sun_Exposed_Suprapubic	ENSG00000094963.13	FMO2	chr1	171185208	171211230	+	7658	1.03499	568.898	381.358	2.71694e-09	chr1_171179725_T_A_b38	-5483	chr1	171179725	T	A	1	rs79906093	70	76	0.073501	1	1.19441e-10	-0.331108	0.0501968	9.999e-05	9.53193e-07	8.94746e-07	0.000256607	-0.81712	-1.1827	-0.580508
Skin_Not_Sun_Exposed_Suprapubic	ENSG00000135917.13	SLC19A3	chr2	227685210	227718012	-	8882	1.04064	988.342	400.794	4.53938e-08	chr2_227681690_C_T_b38	-36322	chr2	227681690	C	T	1	rs7578746	308	400	0.425532	1	7.67419e-09	-0.222008	0.0377033	9.999e-05	2.93429e-05	2.35411e-05	0.000149805	-0.625894	-0.810794	-0.446241
Skin_Not_Sun_Exposed_Suprapubic	ENSG00000130414.11	NDUFA10	chr2	239892450	240025402	-	10077	1.052	1552.42	398.339	2.16837e-38	chr2_240022777_C_A_b38	-2625	chr2	240022777	C	A	1	rs11679609	274	325	0.314313	1	7.13005e-43	-0.519612	0.0339231	9.999e-05	5.30512e-37	2.90051e-36	9.80729e-05	-0.212823	-0.23958	-0.185137
Skin_Not_Sun_Exposed_Suprapubic	ENSG00000142330.19	CAPN10	chr2	240586716	240617705	+	9651	1.03716	1275.97	393.144	1.38438e-15	chr2_240587445_C_T_b38	729	chr2	240587445	C	T	1	rs67448739	143	152	0.147002	1	1.63758e-17	-0.272734	0.030714	9.999e-05	6.35788e-13	1.01022e-12	0.000115041	-0.199312	-0.22939	-0.154351
Skin_Not_Sun_Exposed_Suprapubic	ENSG00000157017.15	GHRL	chr3	10285747	10291451	-	7468	1.03573	1153.7	396.429	2.08542e-08	chr3_10297453_C_T_b38	6002	chr3	10297453	C	T	1	rs9683165	361	475	0.459381	1	2.64971e-09	0.284084	0.04676	9.999e-05	1.62012e-05	1.34091e-05	0.000126779	0.359286	0.234084	0.480891
Skin_Not_Sun_Exposed_Suprapubic	ENSG00000180767.9	CHST13	chr3	126524283	126543291	+	9352	1.03598	803.977	390.47	9.58516e-24	chr3_126515183_A_G_b38	-9100	chr3	126515183	A	G	1	rs10804576	354	478	0.462282	-1	5.97255e-27	0.564708	0.0491479	9.999e-05	1.43322e-21	3.95811e-21	0.000182034	1.59672	1.40913	1.81424
Skin_Not_Sun_Exposed_Suprapubic	ENSG00000051382.8	PIK3CB	chr3	138652699	138834938	-	5811	1.02698	508.559	386.4	3.41789e-07	chr3_138878115_A_G_b38	43177	chr3	138878115	A	G	1	rs9833586	62	65	0.0628627	-1	4.14481e-08	-0.224725	0.0402636	0.00029997	0.000136012	0.000100342	0.000281327	-0.164122	-0.259613	-0.132614
Skin_Not_Sun_Exposed_Suprapubic	ENSG00000121879.3	PIK3CA	chr3	179148114	179236690	+	6779	1.0298	706.894	393.919	7.54064e-08	chr3_179132544_A_G_b38	-15570	chr3	179132544	A	G	1	rs2677774	373	489	0.472921	-1	1.00963e-08	-0.120259	0.0205949	9.999e-05	3.9249e-05	3.09558e-05	0.00020385	-0.073762	-0.091124	-0.05091
Skin_Not_Sun_Exposed_Suprapubic	ENSG00000136521.12	NDUFB5	chr3	179604702	179627647	+	6792	1.04208	571.097	384.359	8.17453e-27	chr3_179621555_T_TGGTCTCGG_b38	16853	chr3	179621555	T	TGGTCTCGG	1	rs11282225	377	511	0.494197	1	6.42453e-31	-0.269691	0.0215916	9.999e-05	4.78014e-25	1.57727e-24	0.00026016	-0.154216	-0.174799	-0.134212
Skin_Not_Sun_Exposed_Suprapubic	ENSG00000114770.16	ABCC5	chr3	183919934	184018015	-	7604	1.03699	1025.04	395.774	1.41108e-10	chr3_183917929_AG_A_b38	-100086	chr3	183917929	AG	A	1	rs4148597	67	71	0.0686654	1	9.25174e-12	-0.344343	0.0491714	9.999e-05	7.94917e-08	8.24989e-08	0.000143139	-0.397302	-0.554673	-0.316429
Skin_Not_Sun_Exposed_Suprapubic	ENSG00000109390.11	NDUFC1	chr4	139289917	139302551	-	6947	1.06306	982.987	394.748	1.74805e-36	chr4_139284774_T_C_b38	-17777	chr4	139284774	T	C	1	rs59733101	251	295	0.2853	1	4.32683e-41	0.364867	0.0244735	9.999e-05	1.43494e-35	7.44488e-35	0.000159067	0.211775	0.191065	0.238562
Skin_Not_Sun_Exposed_Suprapubic	ENSG00000164258.11	NDUFS4	chr5	53560633	53683340	+	8298	1.04489	747.675	392.129	9.0376e-12	chr5_53575584_T_C_b38	14951	chr5	53575584	T	C	1	rs13164833	253	292	0.282398	1	3.25909e-13	-0.186289	0.0248082	9.999e-05	2.84763e-09	3.34191e-09	0.000200107	-0.10007	-0.121741	-0.075758
Skin_Not_Sun_Exposed_Suprapubic	ENSG00000170606.14	HSPA4	chr5	133051962	133106449	+	6836	1.05702	872.293	392.969	1.11171e-18	chr5_133091159_GTT_G_b38	39197	chr5	133091159	GTT	G	1	rs147133967	65	69	0.0667311	1	4.91361e-21	-0.384951	0.0388721	9.999e-05	1.31736e-16	2.7099e-16	0.000176667	-0.239185	-0.282688	-0.196385
Skin_Not_Sun_Exposed_Suprapubic	ENSG00000204371.11	EHMT2	chr6	31879759	31897684	-	26877	1.05757	550.517	353.268	2.23437e-07	chr6_31931897_CCCCCCCACCTCCCTCCCGGACGGCGCGGCTGGCCGGGCGGGGGGCTGAT_C_b38	34213	chr6	31931897	CCCCCCCACCTCCCTCCCGGACGGCGCGGCTGGCCGGGCGGGGGGCTGAT	C	1	rs1218955129	277	346	0.334623	1	5.66975e-09	-0.143613	0.0241691	9.999e-05	7.14126e-05	5.46278e-05	0.000280281	-0.067482	-0.083627	-0.0413
Skin_Not_Sun_Exposed_Suprapubic	ENSG00000123545.5	NDUFAF4	chr6	96889313	96897881	-	7110	1.05237	528.509	387.24	3.37806e-09	chr6_96840127_A_G_b38	-57754	chr6	96840127	A	G	1	rs6568631	128	129	0.124758	-1	2.11908e-10	-0.250834	0.038576	9.999e-05	8.72358e-07	8.2123e-07	0.000288298	-0.2201	-0.283111	-0.172158
Skin_Not_Sun_Exposed_Suprapubic	ENSG00000146477.5	SLC22A3	chr6	160348268	160452581	+	8277	1.03221	900.248	397.149	2.02647e-22	chr6_160437156_G_A_b38	88888	chr6	160437156	G	A	1	rs2292334	296	380	0.367505	1	4.92383e-25	0.515381	0.046894	9.999e-05	4.48196e-20	1.13839e-19	0.000161044	0.426543	0.364935	0.522862
Skin_Not_Sun_Exposed_Suprapubic	ENSG00000189043.9	NDUFA4	chr7	10931951	10940256	-	10380	1.04772	1007.99	390.732	9.41581e-08	chr7_10929328_A_G_b38	-10928	chr7	10929328	A	G	1	rs12670668	41	46	0.0444874	1	1.13299e-08	-0.329463	0.0566227	9.999e-05	5.97392e-05	4.6079e-05	0.000149469	-0.199372	-0.268316	-0.141428
Skin_Not_Sun_Exposed_Suprapubic	ENSG00000257743.8	MGAM2	chr7	142111749	142222324	+	6778	1.0664	734.629	391.758	1.39084e-07	chr7_142097089_C_T_b38	-14660	chr7	142097089	C	T	1	rs4434539	311	380	0.367505	-1	1.84472e-08	0.209381	0.0365391	9.999e-05	5.38946e-05	4.1784e-05	0.000214537	0.723964	0.506965	0.943661
Skin_Not_Sun_Exposed_Suprapubic	ENSG00000254087.7	LYN	chr8	55879813	56014168	+	7973	1.03889	682.641	389.51	1.21173e-08	chr8_55986299_T_A_b38	106486	chr8	55986299	T	A	1	rs6988731	59	69	0.0667311	1	1.03054e-09	0.363491	0.0582733	9.999e-05	5.1592e-06	4.50966e-06	0.000215943	0.382629	0.29896	0.506116
Skin_Not_Sun_Exposed_Suprapubic	ENSG00000147684.7	NDUFB9	chr8	124543087	124568378	+	7990	1.04281	1108.63	399.572	7.22299e-10	chr8_124539326_C_T_b38	-3761	chr8	124539326	C	T	1	rs7010411	239	278	0.268859	1	7.17469e-11	0.145653	0.0218084	9.999e-05	4.30906e-07	4.17636e-07	0.000134271	0.084198	0.058152	0.11287
Skin_Not_Sun_Exposed_Suprapubic	ENSG00000153707.16	PTPRD	chr9	8314246	10612723	-	11646	1.04937	1154.05	389.881	9.75539e-55	chr9_10613049_C_T_b38	326	chr9	10613049	C	T	1	rs113459207	109	114	0.110251	1	1.68622e-62	1.1145	0.0566666	9.999e-05	3.36123e-54	3.39961e-53	0.000131081	1.76911	1.63069	1.93158
Skin_Not_Sun_Exposed_Suprapubic	ENSG00000196730.12	DAPK1	chr9	87497228	87708633	+	8691	1.03731	1180.07	400.925	6.63886e-11	chr9_87491352_T_C_b38	-5876	chr9	87491352	T	C	1	rs4878081	378	515	0.498066	1	5.42543e-12	-0.179455	0.0253272	9.999e-05	4.18604e-08	4.45018e-08	0.000124435	-0.195664	-0.242282	-0.142324
Skin_Not_Sun_Exposed_Suprapubic	ENSG00000165841.9	CYP2C19	chr10	94762624	94853260	+	7164	1.03798	548.256	391.398	5.35168e-20	chr10_94714894_A_G_b38	-47730	chr10	94714894	A	G	1	rs12570829	166	182	0.176015	1	1.28982e-22	0.503128	0.0486541	9.999e-05	6.79925e-18	1.5235e-17	0.000268258	0.989182	0.818919	1.13758
Skin_Not_Sun_Exposed_Suprapubic	ENSG00000138115.13	CYP2C8	chr10	95036772	95069497	-	7085	1.06959	446.085	380.081	2.72831e-08	chr10_95168931_C_T_b38	99434	chr10	95168931	C	T	1	rs11188220	145	152	0.147002	1	1.65914e-09	-0.479632	0.0779097	9.999e-05	5.36892e-06	4.68176e-06	0.000355957	-0.808324	-1.20284	-0.58732
Skin_Not_Sun_Exposed_Suprapubic	ENSG00000174775.16	HRAS	chr11	532242	537287	-	6400	1.0339	845.71	395.152	1.18091e-11	chr11_528575_A_G_b38	-8712	chr11	528575	A	G	1	rs7931091	263	312	0.301741	1	5.42076e-13	-0.134128	0.0180429	9.999e-05	5.26994e-09	6.03614e-09	0.000172156	-0.111877	-0.134047	-0.086683
Skin_Not_Sun_Exposed_Suprapubic	ENSG00000187486.5	KCNJ11	chr11	17385859	17389331	-	6662	1.04327	717.008	393.57	4.01905e-29	chr11_17385085_T_C_b38	-4246	chr11	17385085	T	C	1	rs10766395	325	402	0.388781	1	7.47322e-33	0.510548	0.0393805	9.999e-05	2.21958e-27	8.18157e-27	0.000207834	0.744287	0.673185	0.856414
Skin_Not_Sun_Exposed_Suprapubic	ENSG00000006071.12	ABCC8	chr11	17392885	17476845	-	6843	1.02107	818.919	403.053	4.83773e-37	chr11_17476510_G_A_b38	-335	chr11	17476510	G	A	1	rs77889556	171	186	0.179884	1	6.75379e-41	0.811432	0.0545901	9.999e-05	7.76701e-35	3.92465e-34	0.000172114	1.73517	1.56117	1.89458
Skin_Not_Sun_Exposed_Suprapubic	ENSG00000167792.11	NDUFV1	chr11	67606852	67612535	+	6269	1.04207	579.333	388.364	1.323e-25	chr11_67600451_C_T_b38	-6401	chr11	67600451	C	T	1	rs11603991	337	404	0.390716	1	3.16302e-29	0.286101	0.0237055	9.999e-05	8.83461e-24	2.74973e-23	0.000256456	0.127454	0.111317	0.15055
Skin_Not_Sun_Exposed_Suprapubic	ENSG00000110717.12	NDUFS8	chr11	68030627	68036644	+	7034	1.05505	646.831	387.382	1.01224e-21	chr11_68010856_A_G_b38	-19771	chr11	68010856	A	G	1	rs3764821	197	216	0.208897	1	8.06486e-25	-0.244899	0.0223986	9.999e-05	6.37574e-20	1.60429e-19	0.000237105	-0.193063	-0.225353	-0.156145
Skin_Not_Sun_Exposed_Suprapubic	ENSG00000151366.12	NDUFC2	chr11	78068352	78080219	-	7061	1.04099	682.414	389.695	1.09803e-08	chr11_78135711_G_A_b38	55492	chr11	78135711	G	A	1	rs10793288	364	470	0.454545	1	9.29173e-10	0.137311	0.0219512	9.999e-05	4.53784e-06	3.98793e-06	0.000217142	0.104605	0.083825	0.126304
Skin_Not_Sun_Exposed_Suprapubic	ENSG00000151704.15	KCNJ1	chr11	128836315	128867373	-	7297	1.04398	1168.03	405.334	9.30154e-13	chr11_128870995_C_T_b38	3622	chr11	128870995	C	T	2	rs12274612	79	86	0.0831721	1	6.43472e-14	-0.470425	0.0607342	9.999e-05	4.29996e-10	5.42968e-10	0.000127811	-1.57146	-2.57624	-0.96091
Skin_Not_Sun_Exposed_Suprapubic	ENSG00000139180.10	NDUFA9	chr12	4649107	4694317	+	7796	1.03988	1523.6	406.338	6.45473e-11	chr12_4660710_C_A_b38	11603	chr12	4660710	C	A	1	rs11614030	260	309	0.298839	1	7.26893e-12	0.152453	0.0216542	9.999e-05	5.07902e-08	5.36273e-08	9.69975e-05	0.07848	0.06162	0.092742
Skin_Not_Sun_Exposed_Suprapubic	ENSG00000184752.12	NDUFA12	chr12	94897055	95003770	-	8936	1.06859	1013.75	388.702	2.26682e-08	chr12_95003776_T_C_b38	6	chr12	95003776	T	C	1	rs835044	289	337	0.325919	-1	2.03018e-09	-0.162423	0.0265332	9.999e-05	1.07145e-05	9.03562e-06	0.000156285	-0.092267	-0.121246	-0.059997
Skin_Not_Sun_Exposed_Suprapubic	ENSG00000111199.10	TRPV4	chr12	109783085	109832735	-	5509	1.05101	508.61	386.509	1.8642e-11	chr12_109833546_A_G_b38	811	chr12	109833546	A	G	1	rs7303725	320	410	0.396518	-1	5.071e-13	-0.206793	0.0277807	9.999e-05	3.61329e-09	4.20229e-09	0.000298585	-0.287018	-0.336051	-0.227588
Skin_Not_Sun_Exposed_Suprapubic	ENSG00000089250.18	NOS1	chr12	117208142	117452170	-	7654	1.02077	1294.35	406.742	3.39745e-51	chr12_117349749_G_T_b38	-102421	chr12	117349749	G	T	1	rs4766845	188	209	0.202128	1	4.32763e-56	-0.884719	0.0484331	9.999e-05	4.52735e-49	3.86101e-48	0.000108815	-2.29263	-3.09296	-1.90407
Skin_Not_Sun_Exposed_Suprapubic	ENSG00000111725.10	PRKAB1	chr12	119667753	119681630	+	6702	1.04577	790.506	390.012	3.45946e-22	chr12_119671479_AGGCACCTCTTCACAGGAC_A_b38	3726	chr12	119671479	AGGCACCTCTTCACAGGAC	A	1	rs138621699	85	89	0.0860735	1	3.38381e-25	0.594976	0.0539255	9.999e-05	3.78932e-20	9.6563e-20	0.000189676	0.337821	0.308963	0.386772
Skin_Not_Sun_Exposed_Suprapubic	ENSG00000183648.9	NDUFB1	chr14	92116122	92121917	-	8455	1.03855	1283.4	407.789	2.49718e-09	chr14_92114383_T_TA_b38	-7534	chr14	92114383	T	TA	1	rs34486350	188	206	0.199226	1	4.31968e-10	-0.159887	0.0250441	9.999e-05	1.93519e-06	1.7673e-06	0.000114771	-0.136613	-0.16754	-0.106637
Skin_Not_Sun_Exposed_Suprapubic	ENSG00000137806.8	NDUFAF1	chr15	41387349	41402519	-	6332	1.03789	527.68	388.451	6.29274e-22	chr15_41402441_G_A_b38	-78	chr15	41402441	G	A	1	rs146883891	33	34	0.032882	1	5.41073e-25	0.881335	0.0802708	9.999e-05	6.51495e-20	1.63865e-19	0.000278654	0.512276	0.446036	0.574706
Skin_Not_Sun_Exposed_Suprapubic	ENSG00000140990.14	NDUFB10	chr16	1959508	1961975	+	8673	1.05259	1296.46	394.333	6.07394e-12	chr16_1964282_A_G_b38	4774	chr16	1964282	A	G	1	rs2286466	161	176	0.170213	-1	2.41843e-13	0.229151	0.0303389	9.999e-05	2.88427e-09	3.38047e-09	0.000117602	0.120091	0.093508	0.14432
Skin_Not_Sun_Exposed_Suprapubic	ENSG00000168447.10	SCNN1B	chr16	23278231	23381299	+	6242	1.01376	1011.36	405.247	5.71095e-15	chr16_23258028_T_C_b38	-20203	chr16	23258028	T	C	1	rs62031946	218	246	0.237911	1	2.34212e-16	0.261959	0.0307218	9.999e-05	4.02193e-12	6.01301e-12	0.000136775	0.30169	0.251363	0.358734
Skin_Not_Sun_Exposed_Suprapubic	ENSG00000167720.12	SRR	chr17	2303383	2325260	+	8461	1.0254	1587.27	407.997	2.09342e-44	chr17_2304032_G_A_b38	649	chr17	2304032	G	A	1	rs3744270	270	326	0.31528	1	1.73743e-48	-0.705035	0.0425122	9.999e-05	3.07989e-42	2.05105e-41	8.9787e-05	-0.53879	-0.612006	-0.464241
Skin_Not_Sun_Exposed_Suprapubic	ENSG00000171298.12	GAA	chr17	80101556	80119879	+	9997	1.0335	1756.9	401.231	9.92717e-66	chr17_80101429_C_T_b38	-127	chr17	80101429	C	T	1	rs2304850	200	222	0.2147	1	5.03467e-73	-0.870067	0.0396272	9.999e-05	1.46694e-64	2.19157e-63	8.27913e-05	-0.70286	-0.786569	-0.622976
Skin_Not_Sun_Exposed_Suprapubic	ENSG00000174886.12	NDUFA11	chr19	5891276	5904006	-	8886	1.03164	1599.76	404.472	1.25502e-24	chr19_5895347_C_T_b38	-8659	chr19	5895347	C	T	1	rs72989070	148	162	0.156673	1	4.76722e-27	-0.30093	0.0261333	9.999e-05	4.38477e-22	1.24934e-21	9.05001e-05	-0.189506	-0.213109	-0.1642
Skin_Not_Sun_Exposed_Suprapubic	ENSG00000130203.9	APOE	chr19	44905754	44909393	+	7861	1.05132	1104.8	395.457	2.78495e-23	chr19_44913221_A_G_b38	7467	chr19	44913221	A	G	1	rs584007	300	359	0.347195	-1	4.15701e-26	-0.304792	0.0270403	9.999e-05	2.99869e-21	8.12937e-21	0.000137576	-0.384262	-0.454203	-0.329187
Skin_Not_Sun_Exposed_Suprapubic	ENSG00000171051.8	FPR1	chr19	51745172	51804110	-	10609	1.04841	1562.05	395.37	3.93155e-11	chr19_51747508_A_G_b38	-56602	chr19	51747508	A	G	1	rs7253284	276	324	0.313346	-1	2.1364e-12	0.283461	0.0392172	9.999e-05	2.69101e-08	2.90464e-08	9.66184e-05	0.889361	0.616597	1.13118
Skin_Not_Sun_Exposed_Suprapubic	ENSG00000170906.15	NDUFA3	chr19	54102728	54109257	+	12746	1.01947	2433.85	405.105	2.52548e-45	chr19_54108427_A_G_b38	5699	chr19	54108427	A	G	1	rs75622830	110	113	0.109284	1	7.81492e-50	0.63191	0.037425	9.999e-05	9.61047e-43	6.51914e-42	5.76787e-05	0.428619	0.382682	0.471567
Skin_Not_Sun_Exposed_Suprapubic	ENSG00000105618.13	PRPF31	chr19	54115676	54131719	+	12708	1.01996	2858.81	414.839	1.59518e-08	chr19_54128691_C_T_b38	13015	chr19	54128691	C	T	1	rs8107970	140	150	0.145068	1	4.45862e-09	0.204125	0.0341096	9.999e-05	3.70376e-05	2.93236e-05	4.91667e-05	0.08192	0.060286	0.100305
Skin_Not_Sun_Exposed_Suprapubic	ENSG00000160194.17	NDUFV3	chr21	42879644	42913304	+	8344	1.02662	1247.55	399.757	1.09206e-34	chr21_42918300_G_A_b38	38656	chr21	42918300	G	A	1	rs2839606	358	478	0.462282	-1	1.36987e-38	0.397157	0.0277168	9.999e-05	2.03124e-32	9.3011e-32	0.000114589	0.202451	0.175128	0.224731
Skin_Not_Sun_Exposed_Suprapubic	ENSG00000100191.5	SLC5A4	chr22	32218476	32255341	-	8455	1.04394	831.13	391.769	3.40453e-13	chr22_32365481_G_A_b38	110140	chr22	32365481	G	A	1	rs16990269	63	64	0.0618956	1	7.60338e-15	0.799962	0.0993853	9.999e-05	1.05635e-10	1.40484e-10	0.000179596	1.43649	1.16886	1.62841
Skin_Not_Sun_Exposed_Suprapubic	ENSG00000184983.9	NDUFA6	chr22	42085525	42090930	-	7183	1.05596	568.046	383.988	4.66923e-65	chr22_42084417_G_A_b38	-6513	chr22	42084417	G	A	1	rs139043947	33	34	0.032882	1	1.93e-75	1.38716	0.0617002	9.999e-05	9.27159e-66	1.46642e-64	0.00027058	0.759958	0.712423	0.800276
Skin_Not_Sun_Exposed_Suprapubic	ENSG00000100197.20	CYP2D6	chr22	42126499	42130906	-	7271	1.04911	527.092	374.81	1.42684e-65	chr22_42142093_C_T_b38	11187	chr22	42142093	C	T	1	rs3021083	359	466	0.450677	-1	7.38185e-78	0.739029	0.0321188	9.999e-05	6.54944e-66	1.04119e-64	0.000286785	1.05984	0.984372	1.14236
Skin_Not_Sun_Exposed_Suprapubic	ENSG00000186951.16	PPARA	chr22	46150521	46243756	+	9539	1.03726	1426.87	394.857	9.98176e-88	chr22_46143780_T_C_b38	-6741	chr22	46143780	T	C	1	rs135560	285	347	0.33559	1	4.51719e-99	0.694732	0.0250768	9.999e-05	1.05311e-87	3.73102e-86	0.000102901	0.706521	0.659888	0.761302
Skin_Not_Sun_Exposed_Suprapubic	ENSG00000147123.10	NDUFB11	chrX	47142216	47144868	-	3948	1.03634	487.524	399.681	9.22452e-11	chrX_47123240_C_T_b38	-21628	chrX	47123240	C	T	1	rs6611333	244	420	0.40619	-1	7.26177e-12	0.116031	0.0164806	9.999e-05	2.39395e-08	2.59529e-08	0.00030044	0.078796	0.059704	0.094461
Skin_Not_Sun_Exposed_Suprapubic	ENSG00000072506.12	HSD17B10	chrX	53431258	53434373	-	2292	1.02894	329.981	400.216	5.11596e-22	chrX_53434412_G_C_b38	39	chrX	53434412	G	C	1	rs1264014	282	472	0.45648	-1	2.0924e-24	-0.172428	0.0159305	9.999e-05	4.77225e-20	1.21014e-19	0.000435686	-0.128204	-0.147837	-0.111217
Skin_Not_Sun_Exposed_Suprapubic	ENSG00000125356.6	NDUFA1	chrX	119871828	119876662	+	4918	1.02136	781.307	407.669	1.85243e-11	chrX_119868320_C_A_b38	-3508	chrX	119868320	C	A	1	rs2428217	277	471	0.455513	-1	2.00479e-12	0.109148	0.0150807	9.999e-05	9.75335e-09	1.09252e-08	0.000180533	0.081671	0.06128	0.09386
Skin_Sun_Exposed_Lower_leg	ENSG00000162551.13	ALPL	chr1	21509372	21578412	+	7957	1.03908	937.506	474.212	1.96443e-15	chr1_21496799_C_T_b38	-12573	chr1	21496799	C	T	1	rs1697421	430	555	0.458678	1	3.23205e-17	-0.239169	0.0273936	9.999e-05	6.29848e-13	7.25985e-13	0.000201139	-0.601511	-0.703404	-0.452206
Skin_Sun_Exposed_Lower_leg	ENSG00000168653.10	NDUFS5	chr1	39026318	39034636	+	6847	1.04301	946.916	478.509	6.88991e-148	chr1_39040469_A_G_b38	14151	chr1	39040469	A	G	1	rs11205599	309	363	0.3	1	4.01074e-165	-0.711574	0.0175651	9.999e-05	4.02646e-151	6.35549e-149	0.000200931	-0.534227	-0.56549	-0.507784
Skin_Sun_Exposed_Lower_leg	ENSG00000117394.20	SLC2A1	chr1	42925375	42959048	-	6088	1.04791	521.964	459.478	1.07754e-11	chr1_43007582_C_T_b38	48534	chr1	43007582	C	T	1	rs6656620	301	362	0.308348	1	2.24127e-13	-0.19318	0.0256703	9.999e-05	2.21694e-09	1.96071e-09	0.000368542	-0.291856	-0.35484	-0.222522
Skin_Sun_Exposed_Lower_leg	ENSG00000085832.16	EPS15	chr1	51354263	51519328	-	4443	1.03484	251.804	460.85	1.51429e-79	chr1_51370670_G_A_b38	-148658	chr1	51370670	G	A	1	rs148648502	68	68	0.0561983	1	4.72681e-92	1.22053	0.0487866	9.999e-05	8.17701e-80	1.18284e-78	0.00074139	0.621261	0.571455	0.680817
Skin_Sun_Exposed_Lower_leg	ENSG00000162692.10	VCAM1	chr1	100719742	100739045	+	7352	1.0314	606.26	464.768	8.64123e-16	chr1_100725310_A_C_b38	5568	chr1	100725310	A	C	1	rs3917010	237	261	0.215702	1	6.03844e-18	-0.289042	0.0323108	9.999e-05	2.12692e-13	2.5298e-13	0.000305575	-0.957057	-1.26252	-0.725935
Skin_Sun_Exposed_Lower_leg	ENSG00000243480.7	AMY2A	chr1	103616811	103625780	+	8055	1.05274	464.432	457.467	1.23631e-11	chr1_103501179_C_G_b38	-115632	chr1	103501179	C	G	1	rs78848391	95	100	0.0826446	1	2.33231e-13	0.715655	0.0951709	9.999e-05	2.06229e-09	1.82906e-09	0.0004187	2.32573	2.02043	2.77138
Skin_Sun_Exposed_Lower_leg	ENSG00000134184.12	GSTM1	chr1	109687814	109693745	+	6623	1.00865	1074.86	484.648	1.81518e-17	chr1_109675302_G_A_b38	-12512	chr1	109675302	G	A	1	rs611951	158	170	0.140496	-1	4.02143e-19	-0.710631	0.0765348	9.999e-05	1.47918e-14	1.89729e-14	0.000163384	-4.85556	-5.50048	-4.27357
Skin_Sun_Exposed_Lower_leg	ENSG00000131791.7	PRKAB2	chr1	147155106	147172550	-	6380	1.04278	720.491	476.341	1.72419e-20	chr1_147176645_C_T_b38	4095	chr1	147176645	C	T	1	rs4950382	304	356	0.294215	1	8.08214e-23	-0.19934	0.0193531	9.999e-05	2.30608e-18	3.76398e-18	0.000263928	-0.196341	-0.232043	-0.162662
Skin_Sun_Exposed_Lower_leg	ENSG00000158864.12	NDUFS2	chr1	161197104	161214395	+	7456	1.04786	883.889	474.447	9.28608e-10	chr1_161216523_C_T_b38	19419	chr1	161216523	C	T	1	rs4379692	311	351	0.290083	1	8.00519e-11	-0.153198	0.0230922	9.999e-05	4.11033e-07	3.02589e-07	0.000217632	-0.066588	-0.085868	-0.044764
Skin_Sun_Exposed_Lower_leg	ENSG00000198929.12	NOS1AP	chr1	162069774	162370475	+	7637	1.04567	940.614	472.932	1.9429e-17	chr1_162381664_A_G_b38	311890	chr1	162381664	A	G	1	rs12407972	208	230	0.190083	1	1.59403e-19	-0.497052	0.0528834	9.999e-05	4.22452e-15	5.62291e-15	0.0002035	-0.742163	-0.908796	-0.60977
Skin_Sun_Exposed_Lower_leg	ENSG00000007933.12	FMO3	chr1	171090877	171117819	+	7905	1.04488	687.768	471.286	2.54791e-08	chr1_171248042_G_A_b38	157165	chr1	171248042	G	A	1	rs2064078	440	585	0.483471	1	2.94001e-09	-0.221408	0.036676	9.999e-05	1.05109e-05	6.70572e-06	0.000277803	-0.511759	-0.636791	-0.33107
Skin_Sun_Exposed_Lower_leg	ENSG00000094963.13	FMO2	chr1	171185208	171211230	+	7658	1.01506	704.753	478.039	7.95534e-15	chr1_171185820_A_G_b38	612	chr1	171185820	A	G	1	rs2020870	85	90	0.0743802	1	2.05996e-16	-0.40735	0.0479852	9.999e-05	3.77065e-12	4.12807e-12	0.000253011	-1.09424	-1.40127	-0.91368
Skin_Sun_Exposed_Lower_leg	ENSG00000125538.11	IL1B	chr2	112829751	112836903	-	6905	1.04192	692.621	468.282	7.53087e-10	chr2_112884955_G_T_b38	48052	chr2	112884955	G	T	1	rs12990810	344	415	0.342975	1	4.74309e-11	0.31001	0.0461507	9.999e-05	2.79269e-07	2.08275e-07	0.00027401	0.89886	0.712457	1.17681
Skin_Sun_Exposed_Lower_leg	ENSG00000023228.13	NDUFS1	chr2	206114817	206159584	-	6870	1.04643	954.921	474.029	3.86421e-08	chr2_206088333_A_G_b38	-71251	chr2	206088333	A	G	1	rs12694039	442	588	0.48595	1	5.21618e-09	-0.125256	0.0210964	0.00029997	2.25098e-05	1.39254e-05	0.000200796	-0.063881	-0.082966	-0.042645
Skin_Sun_Exposed_Lower_leg	ENSG00000135917.13	SLC19A3	chr2	227685210	227718012	-	8882	1.00828	1023.18	487.09	4.90856e-08	chr2_227685582_T_G_b38	-32430	chr2	227685582	T	G	1	rs34020562	400	525	0.433884	1	1.08538e-08	-0.192323	0.0331134	0.00019998	4.61085e-05	2.74852e-05	0.000171484	-0.504953	-0.608478	-0.35269
Skin_Sun_Exposed_Lower_leg	ENSG00000130414.11	NDUFA10	chr2	239892450	240025402	-	10077	1.0258	1581.02	478.548	1.44136e-50	chr2_240027895_G_A_b38	2493	chr2	240027895	G	A	1	rs10166776	342	431	0.356198	1	2.51099e-56	-0.46311	0.0259233	9.999e-05	1.41145e-48	7.7531e-48	0.000115675	-0.19366	-0.213446	-0.171633
[truncated: 324 more rows]

## Sheet: ESM T3. Positive control MR
ESM Table 3. Effect of the expression level of anti-diabetic target genes on glycaemic traits
[truncated: 6,432 more rows]

[truncated: 8 more sheets: ESM T4. Genetic correlation, ESM T5. target_aging MR, ESM T6. Step1 target_CpG MR, ESM T7. CpG sites_IVs, ESM T8. Step2 CpG_aging MR, ESM T9. Mediation analysis, ESM T10. EWAS, ESM T11. TWAS]
