# Supplementary material for: The tissue-specific effects of glucose-lowering drug targets on aging mediated through DNA methylation: a multi-omics genetic study
Source: Research Square preprint supplement (doi:10.21203/rs.3.rs-7798894/v1), 2025-10-21
Supplement: Supplementary file 5 [file efc5368526a2c96262280509.xlsx]

## Sheet: Table 3
Target genes	Tissue_MR_Res	Bulk Tissue Expression （mean TPM）	Sample Size	Enrichment Analyze
EHMT2	Brain_Caudate_basal_ganglia	37.25	300	Not Enriched
EHMT2	Brain_Nucleus_accumbens_basal_ganglia	49.31	285	Not Enriched
EHMT2	Brain_Putamen_basal_ganglia	32.36	254	Not Enriched
HSPA4	Brain_Caudate_basal_ganglia	25.96	300	Not Enriched
HSPA4	Brain_Nucleus_accumbens_basal_ganglia	28.54	285	Not Enriched
HSPA4	Lung	40.69	604	Not Enriched
HSPA4	Testis	94.5	414	Not Enriched
IGF2BP2	Thyroid	13.53	684	Not Enriched
IRS1	Adipose_Visceral_Omentum	8.688	587	Not Enriched
LPL	Nerve_Tibial	339.9	670	Not Enriched
NDUFAF1	Cells_Cultured_fibroblasts	17.06	652	Not Enriched
NDUFAF1	Cells_EBV-transformed_lymphocytes	14.7	327	Not Enriched
NDUFS3	Brain_Cerebellar_Hemisphere	108.9	277	Not Enriched
NDUFS3	Cells_Cultured_fibroblasts	72.29	652	Not Enriched
SLC22A3	Adipose_Subcutaneous	12.04	714	Not Enriched
SLC22A3	Heart_Left_Ventricle	0.8593	452	Not Enriched
SLC22A3	Liver	25.77	262	Not Enriched
SLC22A3	Nerve_Tibial	167.8	670	Not Enriched
SLC22A3	Ovary	43.43	193	Not Enriched
SLC22A3	Testis	5.779	414	Not Enriched
TCF7L2	Artery_Aorta	30.65	472	Not Enriched
KCNJ11	Esophagus_Muscularis	0.7175	614	Not Enriched
Target genes	Tissue_Analyses_Outputs	Enrichment Analyze
IRS1	Cells - Cultured fibroblasts	Tissue enriched
IGF2BP2	Cells - Cultured fibroblasts	Tissue enriched
HSPA4	NA	Low tissue specificity
EHMT2	NA	Low tissue specificity
SLC22A3	Artery - Aorta	Tissue enriched
LPL	Adipose - Visceral (Omentum)	Tissue enriched
TCF7L2	NA	Low tissue specificity
KCNJ11	Muscle - Skeletal	Tissue enriched
NDUFS3	NA	Low tissue specificity
NDUFAF1	NA	Low tissue specificity
